# Supplementary material for: Modulation of gene expression via overlapping binding sites exerted by ZNF143, Notch1 and THAP11
Source: PubMed Central journal article supplement — Nucleic Acids Res. 2013 Feb 12;41(7):4000–14. doi: 10.1093/nar/gkt088 (PMC3627581; doi:10.1093/nar/gkt088), 2013-02-12
Supplement: supp_gkt088_nar-03313-x-2012-File009.pdf [file supp_gkt088_nar-03313-x-2012-File009.pdf]

|                                   | <b>ZNF143</b>    |                  |                |             |                 | <b>ZNF143-HA</b> | <b>ZNF76</b> | <b>ICN1</b>    |
|-----------------------------------|------------------|------------------|----------------|-------------|-----------------|------------------|--------------|----------------|
|                                   | <b>HeLa rep1</b> | <b>HeLa rep2</b> | <b>HPB-ALL</b> | <b>K562</b> | <b>293T-rex</b> | <b>FLP143-HA</b> | <b>FLP76</b> | <b>HPB-ALL</b> |
| <b>Number of reads</b>            | 25680120         | 27890160         | 30950880       | 31759080    | 33242640        | 26253249         | 26523782     | 44174782       |
| <b>Mapped reads</b>               | 20140058         | 22064111         | 24563873       | 24630672    | 26617590        | 19908969         | 20025151     | 33293640       |
| <b>Peaks</b>                      | 4250             | 2388             | 2823           | 6329        | 2570            | 4071             | 3134         | 18686          |
| <b>Peak at &lt;= 2kb from TSS</b> | 2502             | 1632             | 1886           | 2797        | 1518            | 2016             | 1424         | 8467           |
| <b>Peak at &gt; 2kb from TSS</b>  | 1748             | 756              | 937            | 3532        | 1052            | 2055             | 1710         | 10219          |

|                                   | <b>Zfp143</b>    |               |            |
|-----------------------------------|------------------|---------------|------------|
|                                   | <b>mES cells</b> | <b>NIH3T3</b> | <b>MEF</b> |
| <b>Number of reads</b>            | 30617537         | 36603053      | 27806809   |
| <b>Mapped reads</b>               | 22023766         | 24518391      | 19759166   |
| <b>Peaks</b>                      | 6119             | 5453          | 2736       |
| <b>Peak at &lt;= 2kb from TSS</b> | 2150             | 2744          | 1697       |
| <b>Peak at &gt; 2kb from TSS</b>  | 3969             | 2709          | 1039       |

Table S1 : Total number of reads obtained from sequencing. Number of reads mapped on human hg19 and mouse mm9 genomes. Number of peaks obtained with MACS software (p-value of 10<sup>-5</sup> and minimum height of 20 reads for all except ICN1; For ICN1 p-value of 10<sup>-5</sup>, FDR of 0.01 and minimum height of 50 reads).
