# Supplementary material for: Modulation of gene expression via overlapping binding sites exerted by ZNF143, Notch1 and THAP11
Source: PubMed Central journal article supplement — Nucleic Acids Res. 2013 Feb 12;41(7):4000–14. doi: 10.1093/nar/gkt088 (PMC3627581; doi:10.1093/nar/gkt088), 2013-02-12
Supplement: supp_gkt088_nar-03313-x-2012-File010.pdf [file supp_gkt088_nar-03313-x-2012-File010.pdf]

HeLa cells

| ZNF143 peaks <= 2kb from TSS |          |          | Repeats from repeatMasker (USCS) table |          |          |          |                |                |
|------------------------------|----------|----------|----------------------------------------|----------|----------|----------|----------------|----------------|
| Chromosome                   | Start    | End      | Chromosome                             | Start    | End      | repName  | repClass       | repFamily      |
| chr1                         | 762622   | 763023   | chr1                                   | 762942   | 763009   | G-rich   | Low_complexity | Low_complexity |
| chr1                         | 894412   | 894813   | chr1                                   | 894684   | 894732   | (CCCCG)n | Simple_repeat  | Simple_repeat  |
| chr1                         | 1051396  | 1051797  | chr1                                   | 1051521  | 1051549  | GC_rich  | Low_complexity | Low_complexity |
| chr1                         | 1051396  | 1051797  | chr1                                   | 1051615  | 1051653  | GC_rich  | Low_complexity | Low_complexity |
| chr1                         | 1310613  | 1311014  | .                                      | .        | .        | .        | .              | .              |
| chr1                         | 1334717  | 1335118  | .                                      | .        | .        | .        | .              | .              |
| chr1                         | 1342523  | 1342924  | .                                      | .        | .        | .        | .              | .              |
| chr1                         | 1447147  | 1447548  | .                                      | .        | .        | .        | .              | .              |
| chr1                         | 1551000  | 1551401  | .                                      | .        | .        | .        | .              | .              |
| chr1                         | 2457466  | 2457867  | chr1                                   | 2457796  | 2457883  | C-rich   | Low_complexity | Low_complexity |
| chr1                         | 3566493  | 3566894  | chr1                                   | 3566853  | 3567001  | MER53    | DNA            | hAT            |
| chr1                         | 3663726  | 3664127  | chr1                                   | 3663887  | 3663909  | GC_rich  | Low_complexity | Low_complexity |
| chr1                         | 3712829  | 3713230  | .                                      | .        | .        | .        | .              | .              |
| chr1                         | 3773804  | 3774205  | .                                      | .        | .        | .        | .              | .              |
| chr1                         | 3816982  | 3817383  | .                                      | .        | .        | .        | .              | .              |
| chr1                         | 6259526  | 6259927  | .                                      | .        | .        | .        | .              | .              |
| chr1                         | 6662469  | 6662870  | .                                      | .        | .        | .        | .              | .              |
| chr1                         | 6673450  | 6673851  | chr1                                   | 6673413  | 6673570  | C-rich   | Low_complexity | Low_complexity |
| chr1                         | 6761695  | 6762096  | .                                      | .        | .        | .        | .              | .              |
| chr1                         | 10490577 | 10490978 | chr1                                   | 10490722 | 10490748 | GC_rich  | Low_complexity | Low_complexity |
| chr1                         | 10532444 | 10532845 | .                                      | .        | .        | .        | .              | .              |
| chr1                         | 10534799 | 10535200 | .                                      | .        | .        | .        | .              | .              |
| chr1                         | 11072978 | 11073379 | chr1                                   | 11073269 | 11073572 | L2c      | LINE           | L2             |
| chr1                         | 11866642 | 11867043 | .                                      | .        | .        | .        | .              | .              |
| chr1                         | 12040055 | 12040456 | .                                      | .        | .        | .        | .              | .              |
| chr1                         | 15852903 | 15853304 | chr1                                   | 15852854 | 15852972 | MIR3     | SINE           | MIR            |
| chr1                         | 16302363 | 16302764 | chr1                                   | 16302758 | 16302980 | MIRb     | SINE           | MIR            |
| chr1                         | 16940050 | 16940451 | .                                      | .        | .        | .        | .              | .              |
| chr1                         | 17338302 | 17338703 | chr1                                   | 17338252 | 17338346 | GC_rich  | Low_complexity | Low_complexity |
| chr1                         | 17338302 | 17338703 | chr1                                   | 17338598 | 17338757 | MIRb     | SINE           | MIR            |
| chr1                         | 17380354 | 17380755 | .                                      | .        | .        | .        | .              | .              |
| chr1                         | 19536690 | 19537091 | chr1                                   | 19536672 | 19536740 | (CCG)n   | Simple_repeat  | Simple_repeat  |
| chr1                         | 19577945 | 19578346 | .                                      | .        | .        | .        | .              | .              |
| chr1                         | 20834348 | 20834749 | .                                      | .        | .        | .        | .              | .              |
| chr1                         | 20987707 | 20988108 | .                                      | .        | .        | .        | .              | .              |
| chr1                         | 22109969 | 22110370 | .                                      | .        | .        | .        | .              | .              |
| chr1                         | 22778168 | 22778569 | .                                      | .        | .        | .        | .              | .              |
| chr1                         | 23345627 | 23346028 | chr1                                   | 23345582 | 23345685 | L2c      | LINE           | L2             |
| chr1                         | 23670660 | 23671061 | .                                      | .        | .        | .        | .              | .              |
| chr1                         | 23695189 | 23695590 | chr1                                   | 23695435 | 23695462 | GC_rich  | Low_complexity | Low_complexity |
| chr1                         | 24018062 | 24018463 | .                                      | .        | .        | .        | .              | .              |
| chr1                         | 24151695 | 24152096 | chr1                                   | 24151967 | 24151990 | GC_rich  | Low_complexity | Low_complexity |
| chr1                         | 24151695 | 24152096 | chr1                                   | 24152043 | 24152111 | L2b      | LINE           | L2             |
| chr1                         | 24285934 | 24286335 | .                                      | .        | .        | .        | .              | .              |
| chr1                         | 24648200 | 24648601 | .                                      | .        | .        | .        | .              | .              |
| chr1                         | 24969593 | 24969994 | .                                      | .        | .        | .        | .              | .              |
| chr1                         | 26146256 | 26146657 | .                                      | .        | .        | .        | .              | .              |
| chr1                         | 26232856 | 26233257 | .                                      | .        | .        | .        | .              | .              |
| chr1                         | 26324477 | 26324878 | .                                      | .        | .        | .        | .              | .              |
| chr1                         | 26633019 | 26633420 | chr1                                   | 26633411 | 26633572 | MIRb     | SINE           | MIR            |
| chr1                         | 27560645 | 27561046 | .                                      | .        | .        | .        | .              | .              |
| chr1                         | 27930529 | 27930930 | chr1                                   | 27930528 | 27930633 | C-rich   | Low_complexity | Low_complexity |
| chr1                         | 27930529 | 27930930 | chr1                                   | 27930734 | 27930781 | GC_rich  | Low_complexity | Low_complexity |
| chr1                         | 28157092 | 28157493 | .                                      | .        | .        | .        | .              | .              |
| chr1                         | 28414933 | 28415334 | .                                      | .        | .        | .        | .              | .              |
| chr1                         | 28585646 | 28586047 | .                                      | .        | .        | .        | .              | .              |
| chr1                         | 28695975 | 28696376 | .                                      | .        | .        | .        | .              | .              |
| chr1                         | 28832213 | 28832614 | chr1                                   | 28831924 | 28832223 | Alu5z6   | SINE           | Alu            |
| chr1                         | 28908267 | 28908668 | .                                      | .        | .        | .        | .              | .              |
| chr1                         | 28969671 | 28970072 | chr1                                   | 28970067 | 28970230 | MIRb     | SINE           | MIR            |
| chr1                         | 28974676 | 28975077 | .                                      | .        | .        | .        | .              | .              |
| chr1                         | 29063068 | 29063469 | chr1                                   | 29063346 | 29063368 | GC_rich  | Low_complexity | Low_complexity |
| chr1                         | 29508476 | 29508877 | chr1                                   | 29508728 | 29508950 | MIRb     | SINE           | MIR            |
| chr1                         | 31796978 | 31797079 | .                                      | .        | .        | .        | .              | .              |
| chr1                         | 32110076 | 32110477 | .                                      | .        | .        | .        | .              | .              |
| chr1                         | 32645047 | 32645448 | .                                      | .        | .        | .        | .              | .              |
| chr1                         | 32859828 | 32860229 | .                                      | .        | .        | .        | .              | .              |
| chr1                         | 33502359 | 33502760 | .                                      | .        | .        | .        | .              | .              |
| chr1                         | 33937981 | 33938382 | .                                      | .        | .        | .        | .              | .              |
| chr1                         | 35325215 | 35325616 | chr1                                   | 35325578 | 35325668 | L2c      | LINE           | L2             |
| chr1                         | 35497343 | 35497744 | chr1                                   | 35497731 | 35497911 | AluSx    | SINE           | Alu            |
| chr1                         | 35544760 | 35545161 | chr1                                   | 35544620 | 35544780 | MIR      | SINE           | MIR            |
| chr1                         | 36023056 | 36023457 | .                                      | .        | .        | .        | .              | .              |
| chr1                         | 36235627 | 36236028 | chr1                                   | 36236021 | 36236132 | (TA)n    | Simple_repeat  | Simple_repeat  |
| chr1                         | 36554177 | 36554578 | .                                      | .        | .        | .        | .              | .              |
| chr1                         | 36615005 | 36615406 | .                                      | .        | .        | .        | .              | .              |
| chr1                         | 36689751 | 36690152 | .                                      | .        | .        | .        | .              | .              |
| chr1                         | 36863355 | 36863756 | chr1                                   | 36863630 | 36863946 | L2a      | LINE           | L2             |
| chr1                         | 38019732 | 38020133 | chr1                                   | 38020043 | 38020340 | Alu5z6   | SINE           | Alu            |
| chr1                         | 38156075 | 38156476 | .                                      | .        | .        | .        | .              | .              |
| chr1                         | 38412534 | 38412935 | .                                      | .        | .        | .        | .              | .              |
| chr1                         | 38455530 | 38455931 | .                                      | .        | .        | .        | .              | .              |
| chr1                         | 38478049 | 38478450 | .                                      | .        | .        | .        | .              | .              |
| chr1                         | 40506263 | 40506664 | .                                      | .        | .        | .        | .              | .              |
| chr1                         | 40723551 | 40723952 | .                                      | .        | .        | .        | .              | .              |
| chr1                         | 40915477 | 40915878 | .                                      | .        | .        | .        | .              | .              |
| chr1                         | 40974187 | 40974588 | .                                      | .        | .        | .        | .              | .              |
| chr1                         | 40997026 | 40997427 | .                                      | .        | .        | .        | .              | .              |
| chr1                         | 42800695 | 42801096 | chr1                                   | 42800686 | 42800723 | GC_rich  | Low_complexity | Low_complexity |
| chr1                         | 43123883 | 43124284 | .                                      | .        | .        | .        | .              | .              |
| chr1                         | 43311922 | 43312323 | .                                      | .        | .        | .        | .              | .              |
| chr1                         | 43855348 | 43855749 | .                                      | .        | .        | .        | .              | .              |
| chr1                         | 44412191 | 44412592 | .                                      | .        | .        | .        | .              | .              |
| chr1                         | 44435312 | 44435713 | chr1                                   | 44435051 | 44435336 | AluJb    | SINE           | Alu            |
| chr1                         | 44440292 | 44440693 | .                                      | .        | .        | .        | .              | .              |
| chr1                         | 44678888 | 44679289 | chr1                                   | 44678750 | 44678916 | MIRb     | SINE           | MIR            |
| chr1                         | 44820835 | 44821236 | .                                      | .        | .        | .        | .              | .              |
| chr1                         | 44870623 | 44871024 | chr1                                   | 44870837 | 44870898 | (TG)n    | Simple_repeat  | Simple_repeat  |
| chr1                         | 45205160 | 45205561 | chr1                                   | 45205152 | 45205246 | MIRb     | SINE           | MIR            |
| chr1                         | 45241003 | 45241404 | chr1                                   | 45240565 | 45241008 | L2       | LINE           | L2             |
| chr1                         | 45452103 | 45452504 | chr1                                   | 45452456 | 45452550 | L2b      | LINE           | L2             |
| chr1                         | 45769391 | 45769792 | chr1                                   | 45769777 | 45769798 | GC_rich  | Low_complexity | Low_complexity |

| repName count | repClass count | repFamily count |
|---------------|----------------|-----------------|
| GC_rich       | 342            | Low_complexity  |
| C-rich        | 49             | Simple_repeat   |
| (CGG)n        | 43             | SINE            |
| MIRb          | 42             | LINE            |
| (CCG)n        | 40             | LTR             |
| G-rich        | 39             | DNA             |
| MIRc          | 29             | rRNA            |
| MIR3          | 27             | Satellite       |
| L2a           | 25             | rRNA            |
| (CGGGG)n      | 22             | snRNA           |
| (CCCCG)n      | 21             | srrpRNA         |
| MIR           | 20             | rRNA            |
| L2c           | 20             | TcMar-Tigge     |
| L2b           | 19             | Satellite       |
| AluJb         | 15             | hAT-Blackjac    |
| AluSx         | 12             | rRNA            |
| AluSx1        | 11             | hAT-Tip100      |
| (CA)n         | 11             | snRNA           |
| (TG)n         | 10             | hAT             |
| (T)n          | 9              | srrpRNA         |
| AluSp         | 9              |                 |
| L2            | 7              |                 |
| AluS2         | 7              |                 |
| (TCC)n        | 7              |                 |
| AluS2         | 7              |                 |
| CT-rich       | 7              |                 |
| FRAM          | 6              |                 |
| (A)n          | 6              |                 |
| AluJr         | 6              |                 |
| MERSA         | 6              |                 |
| AT_rich       | 6              |                 |
| MLT1J         | 5              |                 |
| (CAG)n        | 5              |                 |
| (CGCGG)n      | 5              |                 |
| AluY          | 5              |                 |
| FLAM_C        | 5              |                 |
| L3            | 4              |                 |
| T-rich        | 4              |                 |
| AluJo         | 4              |                 |
| (CGGGG)n      | 4              |                 |
| AluSc         | 4              |                 |
| (CAGC)n       | 4              |                 |
| AluS6         | 3              |                 |
| (TCCC)n       | 3              |                 |
| (CCCG)n       | 3              |                 |
| (CCCCG)n      | 3              |                 |
| (CTGGG)n      | 3              |                 |
| AluSg         | 3              |                 |
| (GGA)n        | 3              |                 |
| SSU-rRNA_H    | 3              |                 |
| MLT1J1        | 3              |                 |
| (CTG)n        | 3              |                 |
| AluSc8        | 3              |                 |
| MERSB         | 2              |                 |
| (GGCTG)n      | 2              |                 |
| (CCTCG)n      | 2              |                 |
| MER81         | 2              |                 |
| GA-rich       | 2              |                 |
| AluSq         | 2              |                 |
| (GA)n         | 2              |                 |
| L1M5          | 2              |                 |
| (CGAGG)n      | 2              |                 |
| (TCCC)n       | 2              |                 |
| AluS3         | 2              |                 |
| (CGT)n        | 2              |                 |
| (TGAA)n       | 2              |                 |
| L3b           | 2              |                 |
| LTR41         | 2              |                 |
| MER33         | 2              |                 |
| MERSA1        | 2              |                 |
| (TCCC)n       | 2              |                 |
| A-rich        | 2              |                 |
| (CCCCAG)n     | 2              |                 |
| MERS3         | 1              |                 |
| MER67A        | 1              |                 |
| (TA)n         | 1              |                 |
| (TGGG)n       | 1              |                 |
| L1M1          | 1              |                 |
| (TTTA)n       | 1              |                 |
| (GCTG)n       | 1              |                 |
| U2            | 1              |                 |
| L1MA3         | 1              |                 |
| (AGGGGG)n     | 1              |                 |
| L1ME2z        | 1              |                 |
| LTR34         | 1              |                 |
| MER67C        | 1              |                 |
| L1MEg         | 1              |                 |
| MLT1D         | 1              |                 |
| tRNA-Leu-CT   | 1              |                 |
| X7C_LINE      | 1              |                 |
| Zaphod3       | 1              |                 |
| (CTCG)n       | 1              |                 |
| FAM           | 1              |                 |
| MER82         | 1              |                 |
| AluYb8        | 1              |                 |
| tRNA-Asn-AA   | 1              |                 |
| L1MB7         | 1              |                 |
| L1M4          | 1              |                 |
| LTR10D        | 1              |                 |
| CR1_Mam       | 1              |                 |
| (TCCA)n       | 1              |                 |
| BSR/Beta      | 1              |                 |



|       |           |           |       |           |           |           |                |                |   |
|-------|-----------|-----------|-------|-----------|-----------|-----------|----------------|----------------|---|
| chr1  | 169763980 | 169764381 | .     | .         | .         | .         | .              | .              | . |
| chr1  | 169862947 | 169863348 | .     | .         | .         | .         | .              | .              | . |
| chr1  | 172412990 | 172413391 | .     | .         | .         | .         | .              | .              | . |
| chr1  | 172501695 | 172502096 | .     | .         | .         | .         | .              | .              | . |
| chr1  | 173683845 | 173684246 | .     | .         | .         | .         | .              | .              | . |
| chr1  | 173793362 | 173793763 | .     | .         | .         | .         | .              | .              | . |
| chr1  | 173837309 | 173837710 | .     | .         | .         | .         | .              | .              | . |
| chr1  | 179846797 | 179847198 | .     | .         | .         | .         | .              | .              | . |
| chr1  | 179851674 | 179852075 | .     | .         | .         | .         | .              | .              | . |
| chr1  | 179923648 | 179924049 | chr1  | 179923897 | 179923930 | (CCG)n    | Simple_repeat  | Simple_repeat  |   |
| chr1  | 182758637 | 182759038 | .     | .         | .         | .         | .              | .              | . |
| chr1  | 182991864 | 182992265 | chr1  | 182992221 | 182992284 | (TCCCC)n  | Simple_repeat  | Simple_repeat  |   |
| chr1  | 183441013 | 183441414 | .     | .         | .         | .         | .              | .              | . |
| chr1  | 184020649 | 184021050 | .     | .         | .         | .         | .              | .              | . |
| chr1  | 184724048 | 184724449 | .     | .         | .         | .         | .              | .              | . |
| chr1  | 185126099 | 185126500 | .     | .         | .         | .         | .              | .              | . |
| chr1  | 186344289 | 186344690 | .     | .         | .         | .         | .              | .              | . |
| chr1  | 193028310 | 193028711 | .     | .         | .         | .         | .              | .              | . |
| chr1  | 198125890 | 198126291 | chr1  | 198126071 | 198126102 | GC_rich   | Low_complexity | Low_complexity |   |
| chr1  | 198125890 | 198126291 | chr1  | 198126250 | 198126271 | GC_rich   | Low_complexity | Low_complexity |   |
| chr1  | 200378988 | 200379389 | chr1  | 200379078 | 200379104 | (CCG)n    | Simple_repeat  | Simple_repeat  |   |
| chr1  | 201924417 | 201924818 | .     | .         | .         | .         | .              | .              | . |
| chr1  | 201979210 | 201979611 | .     | .         | .         | .         | .              | .              | . |
| chr1  | 202310888 | 202311289 | .     | .         | .         | .         | .              | .              | . |
| chr1  | 202317522 | 202317923 | .     | .         | .         | .         | .              | .              | . |
| chr1  | 203764513 | 203764914 | chr1  | 203764486 | 203764560 | MIR       | SINE           | MIR            |   |
| chr1  | 203830547 | 203830948 | .     | .         | .         | .         | .              | .              | . |
| chr1  | 205091197 | 205091598 | .     | .         | .         | .         | .              | .              | . |
| chr1  | 205180686 | 205181087 | .     | .         | .         | .         | .              | .              | . |
| chr1  | 205744425 | 205744826 | chr1  | 205744671 | 205744734 | X7C_LINE  | LINE           | CR1            |   |
| chr1  | 211848774 | 211849175 | .     | .         | .         | .         | .              | .              | . |
| chr1  | 212588095 | 212588496 | .     | .         | .         | .         | .              | .              | . |
| chr1  | 212965001 | 212965402 | .     | .         | .         | .         | .              | .              | . |
| chr1  | 213188940 | 213189341 | chr1  | 213189337 | 213189648 | AluSq2    | SINE           | Alu            |   |
| chr1  | 213224343 | 213224744 | .     | .         | .         | .         | .              | .              | . |
| chr1  | 222763076 | 222763477 | .     | .         | .         | .         | .              | .              | . |
| chr1  | 224544309 | 224544710 | chr1  | 224544218 | 224544338 | FRAM      | SINE           | Alu            |   |
| chr1  | 225117075 | 225117476 | .     | .         | .         | .         | .              | .              | . |
| chr1  | 226374209 | 226374610 | chr1  | 226374242 | 226374284 | (CGG)n    | Simple_repeat  | Simple_repeat  |   |
| chr1  | 226496688 | 226497089 | chr1  | 226496938 | 226497081 | GC_rich   | Low_complexity | Low_complexity |   |
| chr1  | 227922899 | 227923300 | .     | .         | .         | .         | .              | .              | . |
| chr1  | 228270166 | 228270567 | .     | .         | .         | .         | .              | .              | . |
| chr1  | 231114537 | 231114938 | chr1  | 231114538 | 231114563 | (CAG)n    | Simple_repeat  | Simple_repeat  |   |
| chr1  | 231663912 | 231664313 | .     | .         | .         | .         | .              | .              | . |
| chr1  | 233431271 | 233431672 | chr1  | 233431324 | 233431361 | (CCG)n    | Simple_repeat  | Simple_repeat  |   |
| chr1  | 233431271 | 233431672 | chr1  | 233431600 | 233431759 | T-rich    | Low_complexity | Low_complexity |   |
| chr1  | 234859844 | 234860245 | chr1  | 234859855 | 234859926 | GA-rich   | Low_complexity | Low_complexity |   |
| chr1  | 235491546 | 235491947 | .     | .         | .         | .         | .              | .              | . |
| chr1  | 235667719 | 235668120 | .     | .         | .         | .         | .              | .              | . |
| chr1  | 236445132 | 236445533 | .     | .         | .         | .         | .              | .              | . |
| chr1  | 236958255 | 236958656 | chr1  | 236958136 | 236958290 | MIRc      | SINE           | MIR            |   |
| chr1  | 241682990 | 241683391 | .     | .         | .         | .         | .              | .              | . |
| chr1  | 242011048 | 242011449 | chr1  | 242010931 | 242011088 | MER67A    | LTR            | ERV1           |   |
| chr1  | 243419065 | 243419466 | .     | .         | .         | .         | .              | .              | . |
| chr1  | 244615379 | 244615780 | .     | .         | .         | .         | .              | .              | . |
| chr1  | 244815865 | 244816266 | .     | .         | .         | .         | .              | .              | . |
| chr1  | 246729360 | 246729761 | .     | .         | .         | .         | .              | .              | . |
| chr1  | 247095333 | 247095734 | chr1  | 247095541 | 247095572 | GC_rich   | Low_complexity | Low_complexity |   |
| chr1  | 249153208 | 249153609 | .     | .         | .         | .         | .              | .              | . |
| chr10 | 5708452   | 5708853   | chr10 | 5708548   | 5708635   | G-rich    | Low_complexity | Low_complexity |   |
| chr10 | 5931798   | 5932199   | .     | .         | .         | .         | .              | .              | . |
| chr10 | 6130786   | 6131187   | chr10 | 6130903   | 6130985   | SUBTEL_sa | Satellite      | Satellite      |   |
| chr10 | 12237847  | 12238248  | .     | .         | .         | .         | .              | .              | . |
| chr10 | 13389810  | 13390211  | chr10 | 13389863  | 13389910  | GC_rich   | Low_complexity | Low_complexity |   |
| chr10 | 13389810  | 13390211  | chr10 | 13389972  | 13389995  | GC_rich   | Low_complexity | Low_complexity |   |
| chr10 | 13389810  | 13390211  | chr10 | 13390112  | 13390137  | (CGG)n    | Simple_repeat  | Simple_repeat  |   |
| chr10 | 13389810  | 13390211  | chr10 | 13390137  | 13390233  | GC_rich   | Low_complexity | Low_complexity |   |
| chr10 | 14880143  | 14880544  | .     | .         | .         | .         | .              | .              | . |
| chr10 | 17685899  | 17686300  | .     | .         | .         | .         | .              | .              | . |
| chr10 | 21814654  | 21815055  | .     | .         | .         | .         | .              | .              | . |
| chr10 | 22605132  | 22605533  | chr10 | 22605176  | 22605284  | GC_rich   | Low_complexity | Low_complexity |   |
| chr10 | 26986290  | 26986691  | chr10 | 26986684  | 26986723  | GC_rich   | Low_complexity | Low_complexity |   |
| chr10 | 27149813  | 27150214  | .     | .         | .         | .         | .              | .              | . |
| chr10 | 27443138  | 27443539  | chr10 | 27443491  | 27443668  | AluSx1    | SINE           | Alu            |   |
| chr10 | 27530846  | 27531247  | .     | .         | .         | .         | .              | .              | . |
| chr10 | 27792922  | 27793323  | .     | .         | .         | .         | .              | .              | . |
| chr10 | 29698242  | 29698643  | .     | .         | .         | .         | .              | .              | . |
| chr10 | 32635904  | 32636305  | .     | .         | .         | .         | .              | .              | . |
| chr10 | 35625055  | 35625456  | chr10 | 35625355  | 35625428  | G-rich    | Low_complexity | Low_complexity |   |
| chr10 | 38265432  | 38265833  | chr10 | 38265455  | 38265485  | GC_rich   | Low_complexity | Low_complexity |   |
| chr10 | 38299304  | 38299705  | .     | .         | .         | .         | .              | .              | . |
| chr10 | 38383047  | 38383448  | .     | .         | .         | .         | .              | .              | . |
| chr10 | 43048158  | 43048559  | .     | .         | .         | .         | .              | .              | . |
| chr10 | 43133944  | 43134345  | .     | .         | .         | .         | .              | .              | . |
| chr10 | 43277920  | 43278321  | .     | .         | .         | .         | .              | .              | . |
| chr10 | 44069836  | 44070237  | .     | .         | .         | .         | .              | .              | . |
| chr10 | 44101644  | 44102045  | .     | .         | .         | .         | .              | .              | . |
| chr10 | 44144176  | 44144577  | .     | .         | .         | .         | .              | .              | . |
| chr10 | 46168307  | 46168708  | chr10 | 46168675  | 46168737  | MIRb      | SINE           | MIR            |   |
| chr10 | 58120815  | 58121216  | .     | .         | .         | .         | .              | .              | . |
| chr10 | 60094472  | 60094873  | chr10 | 60094487  | 60094527  | MIRc      | SINE           | MIR            |   |
| chr10 | 60094472  | 60094873  | chr10 | 60094679  | 60094701  | GC_rich   | Low_complexity | Low_complexity |   |
| chr10 | 60145007  | 60145408  | .     | .         | .         | .         | .              | .              | . |
| chr10 | 64564081  | 64564482  | .     | .         | .         | .         | .              | .              | . |
| chr10 | 69597800  | 69598201  | .     | .         | .         | .         | .              | .              | . |
| chr10 | 74114175  | 74114576  | .     | .         | .         | .         | .              | .              | . |
| chr10 | 74385697  | 74386098  | .     | .         | .         | .         | .              | .              | . |
| chr10 | 74870015  | 74870416  | .     | .         | .         | .         | .              | .              | . |
| chr10 | 75012264  | 75012665  | chr10 | 75012648  | 75012865  | L2b       | LINE           | L2             |   |
| chr10 | 75255638  | 75256039  | .     | .         | .         | .         | .              | .              | . |
| chr10 | 75503599  | 75504000  | chr10 | 75503560  | 75503655  | MIR       | SINE           | MIR            |   |
| chr10 | 75541633  | 75542034  | .     | .         | .         | .         | .              | .              | . |
| chr10 | 75544883  | 75545284  | .     | .         | .         | .         | .              | .              | . |
| chr10 | 76817418  | 76817819  | chr10 | 76817573  | 76817624  | MLT1J     | LTR            | ERVL-MaLR      |   |
| chr10 | 76817418  | 76817819  | chr10 | 76817671  | 76817956  | MLT1J     | LTR            | ERVL-MaLR      |   |



|       |           |           |       |           |                     |                |                |
|-------|-----------|-----------|-------|-----------|---------------------|----------------|----------------|
| chr11 | 59382586  | 59382987  | chr11 | 59382931  | 59383151 (CCG)n     | Simple_repeat  | Simple_repeat  |
| chr11 | 60673924  | 60674325  | chr11 | 60674278  | 60674344 MER5A      | DNA            | hAT-Charlie    |
| chr11 | 60681178  | 60681579  | .     | .         | .                   | .              | .              |
| chr11 | 61100391  | 61100792  | .     | .         | .                   | .              | .              |
| chr11 | 61129266  | 61129667  | .     | .         | .                   | .              | .              |
| chr11 | 61560008  | 61560409  | .     | .         | .                   | .              | .              |
| chr11 | 61584277  | 61584678  | .     | .         | .                   | .              | .              |
| chr11 | 61891032  | 61891433  | .     | .         | .                   | .              | .              |
| chr11 | 62358873  | 62359274  | .     | .         | .                   | .              | .              |
| chr11 | 62413880  | 62414281  | .     | .         | .                   | .              | .              |
| chr11 | 62438969  | 62439370  | .     | .         | .                   | .              | .              |
| chr11 | 62495695  | 62496096  | .     | .         | .                   | .              | .              |
| chr11 | 62538925  | 62539326  | chr11 | 62538897  | 62538926 (CCG)n     | Simple_repeat  | Simple_repeat  |
| chr11 | 62609009  | 62609410  | chr11 | 62609095  | 62609281 U2         | snRNA          | snRNA          |
| chr11 | 62623244  | 62623645  | .     | .         | .                   | .              | .              |
| chr11 | 63439031  | 63439432  | chr11 | 63438998  | 63439041 (CGAGG)n   | Simple_repeat  | Simple_repeat  |
| chr11 | 63536139  | 63536540  | chr11 | 63536094  | 63536219 (CGCG)n    | Simple_repeat  | Simple_repeat  |
| chr11 | 63536139  | 63536540  | chr11 | 63536444  | 63536481 GC_rich    | Low_complexity | Low_complexity |
| chr11 | 63741874  | 63742275  | .     | .         | .                   | .              | .              |
| chr11 | 63753744  | 63754145  | .     | .         | .                   | .              | .              |
| chr11 | 63933438  | 63933839  | .     | .         | .                   | .              | .              |
| chr11 | 64014812  | 64015213  | .     | .         | .                   | .              | .              |
| chr11 | 64073441  | 64073842  | .     | .         | .                   | .              | .              |
| chr11 | 64569954  | 64570355  | chr11 | 64570170  | 64570216 MIR        | SINE           | MIR            |
| chr11 | 64577897  | 64578298  | .     | .         | .                   | .              | .              |
| chr11 | 64691884  | 64692285  | .     | .         | .                   | .              | .              |
| chr11 | 64808278  | 64808679  | .     | .         | .                   | .              | .              |
| chr11 | 64863396  | 64863797  | .     | .         | .                   | .              | .              |
| chr11 | 64884975  | 64885376  | .     | .         | .                   | .              | .              |
| chr11 | 65083980  | 65084381  | chr11 | 65084012  | 65084179 MIRb       | SINE           | MIR            |
| chr11 | 65382618  | 65383019  | .     | .         | .                   | .              | .              |
| chr11 | 65479341  | 65479742  | .     | .         | .                   | .              | .              |
| chr11 | 65488087  | 65488488  | chr11 | 65488426  | 65488572 C-rich     | Low_complexity | Low_complexity |
| chr11 | 65625575  | 65625976  | .     | .         | .                   | .              | .              |
| chr11 | 65728887  | 65729288  | chr11 | 65729283  | 65729454 (CGG)n     | Simple_repeat  | Simple_repeat  |
| chr11 | 65769513  | 65769914  | .     | .         | .                   | .              | .              |
| chr11 | 65819454  | 65819855  | .     | .         | .                   | .              | .              |
| chr11 | 66025051  | 66025452  | .     | .         | .                   | .              | .              |
| chr11 | 66035720  | 66036121  | chr11 | 66035712  | 66035804 MIRc       | SINE           | MIR            |
| chr11 | 66112393  | 66112794  | .     | .         | .                   | .              | .              |
| chr11 | 66138701  | 66139102  | .     | .         | .                   | .              | .              |
| chr11 | 66206329  | 66206730  | .     | .         | .                   | .              | .              |
| chr11 | 66726322  | 66726723  | chr11 | 66726469  | 66726546 MIRb       | SINE           | MIR            |
| chr11 | 66726322  | 66726723  | chr11 | 66726619  | 66727294 LTR34      | LTR            | ERV1           |
| chr11 | 67085065  | 67085466  | .     | .         | .                   | .              | .              |
| chr11 | 67195644  | 67196045  | chr11 | 67195984  | 67196016 GC_rich    | Low_complexity | Low_complexity |
| chr11 | 67374064  | 67374465  | .     | .         | .                   | .              | .              |
| chr11 | 68671154  | 68671555  | .     | .         | .                   | .              | .              |
| chr11 | 69489939  | 69490340  | .     | .         | .                   | .              | .              |
| chr11 | 71639515  | 71639916  | .     | .         | .                   | .              | .              |
| chr11 | 71791563  | 71791964  | .     | .         | .                   | .              | .              |
| chr11 | 71823513  | 71823914  | .     | .         | .                   | .              | .              |
| chr11 | 72145457  | 72145858  | chr11 | 72145851  | 72146154 AluSx1     | SINE           | Alu            |
| chr11 | 72433176  | 72433577  | chr11 | 72433196  | 72433241 (GA)n      | Simple_repeat  | Simple_repeat  |
| chr11 | 72433176  | 72433577  | chr11 | 72433241  | 72433295 (TG)n      | Simple_repeat  | Simple_repeat  |
| chr11 | 72504943  | 72505344  | .     | .         | .                   | .              | .              |
| chr11 | 73309433  | 73309834  | chr11 | 73309555  | 73309616 (TC)n      | Simple_repeat  | Simple_repeat  |
| chr11 | 73358372  | 73358773  | .     | .         | .                   | .              | .              |
| chr11 | 73498957  | 73499358  | chr11 | 73499301  | 73499383 MIR3       | SINE           | MIR            |
| chr11 | 73661827  | 73662228  | .     | .         | .                   | .              | .              |
| chr11 | 73881856  | 73882257  | .     | .         | .                   | .              | .              |
| chr11 | 74109658  | 74110059  | .     | .         | .                   | .              | .              |
| chr11 | 74303390  | 74303791  | chr11 | 74303252  | 74303479 MER44A     | DNA            | TcMar-Tigger   |
| chr11 | 74660036  | 74660437  | .     | .         | .                   | .              | .              |
| chr11 | 75110283  | 75110684  | chr11 | 75110251  | 75110398 MIR3       | SINE           | MIR            |
| chr11 | 76091981  | 76092382  | chr11 | 76091935  | 76092020 GC_rich    | Low_complexity | Low_complexity |
| chr11 | 76155764  | 76156165  | .     | .         | .                   | .              | .              |
| chr11 | 77348663  | 77349064  | chr11 | 77349049  | 77349602 LTR8       | LTR            | ERV1           |
| chr11 | 77531690  | 77532091  | chr11 | 77531732  | 77531758 (CCG)n     | Simple_repeat  | Simple_repeat  |
| chr11 | 77705940  | 77706341  | .     | .         | .                   | .              | .              |
| chr11 | 77790752  | 77791153  | .     | .         | .                   | .              | .              |
| chr11 | 77899581  | 77899982  | .     | .         | .                   | .              | .              |
| chr11 | 82782822  | 82783223  | .     | .         | .                   | .              | .              |
| chr11 | 82996902  | 82997303  | .     | .         | .                   | .              | .              |
| chr11 | 85339418  | 85339819  | .     | .         | .                   | .              | .              |
| chr11 | 86012992  | 86013393  | chr11 | 86012849  | 86013059 MIRc       | SINE           | MIR            |
| chr11 | 93394557  | 93394958  | chr11 | 93394269  | 93394611 AluJb      | SINE           | Alu            |
| chr11 | 93517289  | 93517690  | .     | .         | .                   | .              | .              |
| chr11 | 94706524  | 94706925  | .     | .         | .                   | .              | .              |
| chr11 | 95657054  | 95657455  | .     | .         | .                   | .              | .              |
| chr11 | 105892962 | 105893363 | .     | .         | .                   | .              | .              |
| chr11 | 107436268 | 107436669 | .     | .         | .                   | .              | .              |
| chr11 | 111957411 | 111957812 | .     | .         | .                   | .              | .              |
| chr11 | 113644334 | 113644735 | .     | .         | .                   | .              | .              |
| chr11 | 113746442 | 113746843 | .     | .         | .                   | .              | .              |
| chr11 | 114309926 | 114310327 | .     | .         | .                   | .              | .              |
| chr11 | 117186805 | 117187206 | chr11 | 117186840 | 117186865 GC_rich   | Low_complexity | Low_complexity |
| chr11 | 117186805 | 117187206 | chr11 | 117187189 | 117187468 L2b       | LINE           | L2             |
| chr11 | 117198289 | 117198690 | chr11 | 117198184 | 117198317 AluSx     | SINE           | Alu            |
| chr11 | 118868650 | 118869051 | .     | .         | .                   | .              | .              |
| chr11 | 118888893 | 118889294 | .     | .         | .                   | .              | .              |
| chr11 | 120894573 | 120894974 | .     | .         | .                   | .              | .              |
| chr11 | 125439053 | 125439454 | .     | .         | .                   | .              | .              |
| chr11 | 125772935 | 125773336 | .     | .         | .                   | .              | .              |
| chr11 | 130786193 | 130786594 | .     | .         | .                   | .              | .              |
| chr11 | 134123140 | 134123541 | .     | .         | .                   | .              | .              |
| chr12 | 498619    | 499020    | chr12 | 498714    | 498756 (CGAGG)n     | Simple_repeat  | Simple_repeat  |
| chr12 | 510452    | 510853    | .     | .         | .                   | .              | .              |
| chr12 | 861353    | 861754    | chr12 | 861365    | 861407 polypyrimidi | Low_complexity | Low_complexity |
| chr12 | 1058669   | 1059070   | .     | .         | .                   | .              | .              |
| chr12 | 1099967   | 1100368   | chr12 | 1100100   | 1100133 (TG)n       | Simple_repeat  | Simple_repeat  |
| chr12 | 1099967   | 1100368   | chr12 | 1100231   | 1100259 GC_rich     | Low_complexity | Low_complexity |
| chr12 | 1099967   | 1100368   | chr12 | 1100305   | 1100351 GC_rich     | Low_complexity | Low_complexity |
| chr12 | 1799842   | 1800243   | chr12 | 1800161   | 1800228 (CGG)n      | Simple_repeat  | Simple_repeat  |
| chr12 | 2904883   | 2905284   | chr12 | 2905026   | 2905075 GC_rich     | Low_complexity | Low_complexity |

|       |           |                 |           |                    |                |   |                |   |
|-------|-----------|-----------------|-----------|--------------------|----------------|---|----------------|---|
| chr12 | 4758107   | 4758508         | .         | .                  | .              | . | .              | . |
| chr12 | 6602203   | 6602604         | .         | .                  | .              | . | .              | . |
| chr12 | 6641548   | 6641949 chr12   | 6641360   | 6641576 MER20      | DNA            |   | hAT-Charlie    |   |
| chr12 | 6772210   | 6772611         | .         | .                  | .              | . | .              | . |
| chr12 | 6798374   | 6798775         | .         | .                  | .              | . | .              | . |
| chr12 | 6961454   | 6961855         | .         | .                  | .              | . | .              | . |
| chr12 | 9102423   | 9102824         | .         | .                  | .              | . | .              | . |
| chr12 | 9217379   | 9217780 chr12   | 9217739   | 9217769 (C)n       | Simple_repeat  |   | Simple_repeat  |   |
| chr12 | 9217379   | 9217780 chr12   | 9217769   | 9219265 MER52D     | LTR            |   | ERV1           |   |
| chr12 | 11323977  | 11324378        | .         | .                  | .              | . | .              | . |
| chr12 | 12419868  | 12420269        | .         | .                  | .              | . | .              | . |
| chr12 | 12764525  | 12764926        | .         | .                  | .              | . | .              | . |
| chr12 | 12966061  | 12966462        | .         | .                  | .              | . | .              | . |
| chr12 | 13197111  | 13197512 chr12  | 13197068  | 13197165 MIRb      | SINE           |   | MIR            |   |
| chr12 | 22198925  | 22199326 chr12  | 22199102  | 22199144 GC_rich   | Low_complexity |   | Low_complexity |   |
| chr12 | 22777897  | 22778298        | .         | .                  | .              | . | .              | . |
| chr12 | 26111150  | 26111551 chr12  | 26111421  | 26111461 GC_rich   | Low_complexity |   | Low_complexity |   |
| chr12 | 26111150  | 26111551 chr12  | 26111483  | 26111515 GC_rich   | Low_complexity |   | Low_complexity |   |
| chr12 | 31811929  | 31812330 chr12  | 31811889  | 31811953 L2a       | LINE           |   | L2             |   |
| chr12 | 31811929  | 31812330 chr12  | 31812113  | 31812167 GC_rich   | Low_complexity |   | Low_complexity |   |
| chr12 | 31881956  | 31882357        | .         | .                  | .              | . | .              | . |
| chr12 | 32831910  | 32832311        | .         | .                  | .              | . | .              | . |
| chr12 | 32908616  | 32909017 chr12  | 32908991  | 32909118 MIR       | SINE           |   | MIR            |   |
| chr12 | 34175184  | 34175585 chr12  | 34175185  | 34175215 (T)n      | Simple_repeat  |   | Simple_repeat  |   |
| chr12 | 38710327  | 38710728        | .         | .                  | .              | . | .              | . |
| chr12 | 46384436  | 46384837        | .         | .                  | .              | . | .              | . |
| chr12 | 46663035  | 46663436        | .         | .                  | .              | . | .              | . |
| chr12 | 48099634  | 48100035        | .         | .                  | .              | . | .              | . |
| chr12 | 48499853  | 48500254        | .         | .                  | .              | . | .              | . |
| chr12 | 48551072  | 48551473        | .         | .                  | .              | . | .              | . |
| chr12 | 49110465  | 49110866        | .         | .                  | .              | . | .              | . |
| chr12 | 49245821  | 49246222        | .         | .                  | .              | . | .              | . |
| chr12 | 49449748  | 49450149        | .         | .                  | .              | . | .              | . |
| chr12 | 49961712  | 49962113        | .         | .                  | .              | . | .              | . |
| chr12 | 50135191  | 50135592        | .         | .                  | .              | . | .              | . |
| chr12 | 50505490  | 50505891        | .         | .                  | .              | . | .              | . |
| chr12 | 50794387  | 50794788        | .         | .                  | .              | . | .              | . |
| chr12 | 51441936  | 51442337        | .         | .                  | .              | . | .              | . |
| chr12 | 51477254  | 51477655        | .         | .                  | .              | . | .              | . |
| chr12 | 53574260  | 53574661 chr12  | 53574261  | 53574302 GC_rich   | Low_complexity |   | Low_complexity |   |
| chr12 | 53661806  | 53662207        | .         | .                  | .              | . | .              | . |
| chr12 | 53693300  | 53693701        | .         | .                  | .              | . | .              | . |
| chr12 | 53834882  | 53835283 chr12  | 53834780  | 53835035 L2        | LINE           |   | L2             |   |
| chr12 | 53834882  | 53835283 chr12  | 53835136  | 53835284 L2c       | LINE           |   | L2             |   |
| chr12 | 53845565  | 53845966 chr12  | 53845934  | 53845989 (CCCG)n   | Simple_repeat  |   | Simple_repeat  |   |
| chr12 | 53895126  | 53895527        | .         | .                  | .              | . | .              | . |
| chr12 | 54121199  | 54121600 chr12  | 54121569  | 54121804 MIRc      | SINE           |   | MIR            |   |
| chr12 | 54582703  | 54583104        | .         | .                  | .              | . | .              | . |
| chr12 | 56223238  | 56223639 chr12  | 56222948  | 56223260 AluSg     | SINE           |   | Alu            |   |
| chr12 | 56435508  | 56435909        | .         | .                  | .              | . | .              | . |
| chr12 | 56498062  | 56498463 chr12  | 56498343  | 56498423 (CTCG)n   | Simple_repeat  |   | Simple_repeat  |   |
| chr12 | 56509947  | 56510348 chr12  | 56509922  | 56510018 (GAAA)n   | Simple_repeat  |   | Simple_repeat  |   |
| chr12 | 56511754  | 56512155        | .         | .                  | .              | . | .              | . |
| chr12 | 56546126  | 56546527 chr12  | 56546465  | 56546507 (TG)n     | Simple_repeat  |   | Simple_repeat  |   |
| chr12 | 56660419  | 56660820 chr12  | 56660068  | 56660428 MLT2A2    | LTR            |   | ERV1           |   |
| chr12 | 56709954  | 56710355 chr12  | 56710333  | 56710616 AluSg7    | SINE           |   | Alu            |   |
| chr12 | 56727389  | 56727790        | .         | .                  | .              | . | .              | . |
| chr12 | 57081741  | 57082142        | .         | .                  | .              | . | .              | . |
| chr12 | 57118932  | 57119333        | .         | .                  | .              | . | .              | . |
| chr12 | 57146025  | 57146426        | .         | .                  | .              | . | .              | . |
| chr12 | 57623210  | 57623611        | .         | .                  | .              | . | .              | . |
| chr12 | 57881610  | 57882011 chr12  | 57881349  | 57881657 AluSx     | SINE           |   | Alu            |   |
| chr12 | 57916439  | 57916840 chr12  | 57916461  | 57916484 GC_rich   | Low_complexity |   | Low_complexity |   |
| chr12 | 57916439  | 57916840 chr12  | 57916495  | 57916567 (CGG)n    | Simple_repeat  |   | Simple_repeat  |   |
| chr12 | 57916439  | 57916840 chr12  | 57916812  | 57916973 C-rich    | Low_complexity |   | Low_complexity |   |
| chr12 | 57940869  | 57941270        | .         | .                  | .              | . | .              | . |
| chr12 | 58329755  | 58330156        | .         | .                  | .              | . | .              | . |
| chr12 | 62653921  | 62654322        | .         | .                  | .              | . | .              | . |
| chr12 | 62860403  | 62860804        | .         | .                  | .              | . | .              | . |
| chr12 | 64797850  | 64798251 chr12  | 64798189  | 64798213 GC_rich   | Low_complexity |   | Low_complexity |   |
| chr12 | 64797850  | 64798251 chr12  | 64798246  | 64798279 (CGG)n    | Simple_repeat  |   | Simple_repeat  |   |
| chr12 | 65672251  | 65672652 chr12  | 65672225  | 65672336 GA-rich   | Low_complexity |   | Low_complexity |   |
| chr12 | 65672251  | 65672652 chr12  | 65672341  | 65672389 GC_rich   | Low_complexity |   | Low_complexity |   |
| chr12 | 65672251  | 65672652 chr12  | 65672576  | 65672616 (TCTCCC)n | Simple_repeat  |   | Simple_repeat  |   |
| chr12 | 66524340  | 66524741        | .         | .                  | .              | . | .              | . |
| chr12 | 66562966  | 66563367        | .         | .                  | .              | . | .              | . |
| chr12 | 67662439  | 67662840        | .         | .                  | .              | . | .              | . |
| chr12 | 69080529  | 69080930        | .         | .                  | .              | . | .              | . |
| chr12 | 69864001  | 69864402        | .         | .                  | .              | . | .              | . |
| chr12 | 70637003  | 70637404 chr12  | 70637293  | 70637316 GC_rich   | Low_complexity |   | Low_complexity |   |
| chr12 | 75905352  | 75905753 chr12  | 75905734  | 75905806 L2c       | LINE           |   | L2             |   |
| chr12 | 77157855  | 77158256        | .         | .                  | .              | . | .              | . |
| chr12 | 88429048  | 88429449        | .         | .                  | .              | . | .              | . |
| chr12 | 88535815  | 88536216        | .         | .                  | .              | . | .              | . |
| chr12 | 93835568  | 93835969        | .         | .                  | .              | . | .              | . |
| chr12 | 93861066  | 93861467 chr12  | 93860788  | 93861071 AluJr     | SINE           |   | Alu            |   |
| chr12 | 94656064  | 94656465 chr12  | 94655980  | 94656181 MIR3      | SINE           |   | MIR            |   |
| chr12 | 95467135  | 95467536        | .         | .                  | .              | . | .              | . |
| chr12 | 95611305  | 95611706        | .         | .                  | .              | . | .              | . |
| chr12 | 95867642  | 95868043        | .         | .                  | .              | . | .              | . |
| chr12 | 96252528  | 96252929        | .         | .                  | .              | . | .              | . |
| chr12 | 96429274  | 96429675        | .         | .                  | .              | . | .              | . |
| chr12 | 99038544  | 99038945        | .         | .                  | .              | . | .              | . |
| chr12 | 102455720 | 102456121       | .         | .                  | .              | . | .              | . |
| chr12 | 102513711 | 102514112       | .         | .                  | .              | . | .              | . |
| chr12 | 104323339 | 104323740       | .         | .                  | .              | . | .              | . |
| chr12 | 104350813 | 104351214       | .         | .                  | .              | . | .              | . |
| chr12 | 104359324 | 104359725       | .         | .                  | .              | . | .              | . |
| chr12 | 104458129 | 104458530       | .         | .                  | .              | . | .              | . |
| chr12 | 105501216 | 105501617       | .         | .                  | .              | . | .              | . |
| chr12 | 106639548 | 106639949 chr12 | 106639366 | 106639672 AluSx    | SINE           |   | Alu            |   |
| chr12 | 107167774 | 107168175       | .         | .                  | .              | . | .              | . |
| chr12 | 109490141 | 109490542 chr12 | 109490426 | 109490459 (CGG)n   | Simple_repeat  |   | Simple_repeat  |   |
| chr12 | 109531073 | 109531474       | .         | .                  | .              | . | .              | . |
| chr12 | 109915067 | 109915468       | .         | .                  | .              | . | .              | . |

|       |           |           |       |           |           |             |                |                |
|-------|-----------|-----------|-------|-----------|-----------|-------------|----------------|----------------|
| chr12 | 110151157 | 110151558 | chr12 | 110151184 | 110151288 | MIRb        | SINE           | MIR            |
| chr12 | 111021055 | 111021456 | chr12 | 111021084 | 111021105 | GC_rich     | Low_complexity | Low_complexity |
| chr12 | 111051724 | 111052125 | .     | .         | .         | .           | .              | .              |
| chr12 | 112123639 | 112124040 | .     | .         | .         | .           | .              | .              |
| chr12 | 112820133 | 112820534 | chr12 | 112820131 | 112820164 | (CCG)n      | Simple_repeat  | Simple_repeat  |
| chr12 | 112847237 | 112847638 | chr12 | 112847532 | 112847828 | AluSx       | SINE           | Alu            |
| chr12 | 117175668 | 117176069 | chr12 | 117175719 | 117175742 | GC_rich     | Low_complexity | Low_complexity |
| chr12 | 117175668 | 117176069 | chr12 | 117175809 | 117175830 | GC_rich     | Low_complexity | Low_complexity |
| chr12 | 118814061 | 118814462 | .     | .         | .         | .           | .              | .              |
| chr12 | 120632332 | 120632733 | .     | .         | .         | .           | .              | .              |
| chr12 | 120739956 | 120740357 | chr12 | 120739891 | 120739957 | L1MA3       | LINE           | L1             |
| chr12 | 120907329 | 120907730 | chr12 | 120907371 | 120907464 | (CCG)n      | Simple_repeat  | Simple_repeat  |
| chr12 | 120933518 | 120933919 | chr12 | 120933730 | 120933783 | LTR71B      | LTR            | ERV1           |
| chr12 | 120971916 | 120972317 | chr12 | 120972033 | 120972067 | (CAA)n      | Simple_repeat  | Simple_repeat  |
| chr12 | 120971916 | 120972317 | chr12 | 120972297 | 120972319 | GC_rich     | Low_complexity | Low_complexity |
| chr12 | 121454151 | 121454552 | chr12 | 121454465 | 121454589 | MIR3        | SINE           | MIR            |
| chr12 | 121790129 | 121790530 | .     | .         | .         | .           | .              | .              |
| chr12 | 122326325 | 122326726 | chr12 | 122326411 | 122326463 | L2c         | LINE           | L2             |
| chr12 | 122985404 | 122985805 | chr12 | 122985739 | 122986030 | AluJr       | SINE           | Alu            |
| chr12 | 123011314 | 123011715 | .     | .         | .         | .           | .              | .              |
| chr12 | 123868132 | 123868533 | chr12 | 123867846 | 123868159 | AluSp       | SINE           | Alu            |
| chr12 | 124086398 | 124086799 | .     | .         | .         | .           | .              | .              |
| chr12 | 124457109 | 124457510 | chr12 | 124457130 | 124457227 | GC_rich     | Low_complexity | Low_complexity |
| chr12 | 124457109 | 124457510 | chr12 | 124457305 | 124457371 | GC_rich     | Low_complexity | Low_complexity |
| chr12 | 133405331 | 133405732 | .     | .         | .         | .           | .              | .              |
| chr12 | 133532718 | 133533119 | chr12 | 133533114 | 133533291 | AluJo       | SINE           | Alu            |
| chr12 | 133562662 | 133563063 | .     | .         | .         | .           | .              | .              |
| chr12 | 133613683 | 133614084 | chr12 | 133613425 | 133613715 | AluSx1      | SINE           | Alu            |
| chr12 | 133656646 | 133657047 | .     | .         | .         | .           | .              | .              |
| chr12 | 133706695 | 133707096 | .     | .         | .         | .           | .              | .              |
| chr12 | 133757851 | 133758252 | chr12 | 133757762 | 133757906 | L1MEg       | LINE           | L1             |
| chr13 | 21141181  | 21141582  | chr13 | 21141177  | 21141271  | C-rich      | Low_complexity | Low_complexity |
| chr13 | 21476698  | 21477099  | chr13 | 21477067  | 21477115  | GC_rich     | Low_complexity | Low_complexity |
| chr13 | 21750575  | 21750976  | .     | .         | .         | .           | .              | .              |
| chr13 | 25496882  | 25497283  | .     | .         | .         | .           | .              | .              |
| chr13 | 25875438  | 25875839  | .     | .         | .         | .           | .              | .              |
| chr13 | 26796287  | 26796688  | .     | .         | .         | .           | .              | .              |
| chr13 | 26827858  | 26828259  | .     | .         | .         | .           | .              | .              |
| chr13 | 28712114  | 28712515  | .     | .         | .         | .           | .              | .              |
| chr13 | 30424653  | 30425054  | chr13 | 30424715  | 30424739  | (CGG)n      | Simple_repeat  | Simple_repeat  |
| chr13 | 30881084  | 30881485  | .     | .         | .         | .           | .              | .              |
| chr13 | 31191780  | 31192181  | .     | .         | .         | .           | .              | .              |
| chr13 | 31736322  | 31736723  | .     | .         | .         | .           | .              | .              |
| chr13 | 33112798  | 33113199  | .     | .         | .         | .           | .              | .              |
| chr13 | 41345177  | 41345578  | .     | .         | .         | .           | .              | .              |
| chr13 | 41706798  | 41707199  | .     | .         | .         | .           | .              | .              |
| chr13 | 41768532  | 41768933  | chr13 | 41768887  | 41768988  | AluJb       | SINE           | Alu            |
| chr13 | 41837517  | 41837918  | .     | .         | .         | .           | .              | .              |
| chr13 | 46038802  | 46039203  | chr13 | 46039152  | 46039214  | (CGG)n      | Simple_repeat  | Simple_repeat  |
| chr13 | 47371266  | 47371667  | .     | .         | .         | .           | .              | .              |
| chr13 | 50366894  | 50367295  | .     | .         | .         | .           | .              | .              |
| chr13 | 50656012  | 50656413  | .     | .         | .         | .           | .              | .              |
| chr13 | 52157806  | 52158207  | .     | .         | .         | .           | .              | .              |
| chr13 | 53226723  | 53227124  | chr13 | 53226990  | 53227074  | (CGG)n      | Simple_repeat  | Simple_repeat  |
| chr13 | 79980187  | 79980588  | .     | .         | .         | .           | .              | .              |
| chr13 | 92001073  | 92001474  | chr13 | 92001201  | 92001272  | GC_rich     | Low_complexity | Low_complexity |
| chr13 | 98085955  | 98086356  | chr13 | 98086249  | 98086338  | GC_rich     | Low_complexity | Low_complexity |
| chr13 | 98085955  | 98086356  | chr13 | 98086354  | 98086379  | (CGG)n      | Simple_repeat  | Simple_repeat  |
| chr13 | 100153367 | 100153768 | .     | .         | .         | .           | .              | .              |
| chr13 | 101240891 | 101241292 | chr13 | 101241070 | 101241092 | GC_rich     | Low_complexity | Low_complexity |
| chr13 | 103046726 | 103047127 | .     | .         | .         | .           | .              | .              |
| chr13 | 103426028 | 103426429 | chr13 | 103426148 | 103426191 | GC_rich     | Low_complexity | Low_complexity |
| chr13 | 103451241 | 103451642 | .     | .         | .         | .           | .              | .              |
| chr13 | 107220275 | 107220676 | .     | .         | .         | .           | .              | .              |
| chr13 | 111267718 | 111268119 | .     | .         | .         | .           | .              | .              |
| chr13 | 111365090 | 111365491 | .     | .         | .         | .           | .              | .              |
| chr13 | 111521975 | 111522376 | .     | .         | .         | .           | .              | .              |
| chr13 | 111566850 | 111567251 | chr13 | 111566861 | 111566892 | GC_rich     | Low_complexity | Low_complexity |
| chr13 | 113242279 | 113242680 | .     | .         | .         | .           | .              | .              |
| chr13 | 113343958 | 113344359 | chr13 | 113344180 | 113344280 | G-rich      | Low_complexity | Low_complexity |
| chr13 | 113862762 | 113863163 | chr13 | 113863036 | 113863059 | GC_rich     | Low_complexity | Low_complexity |
| chr13 | 113951250 | 113951651 | .     | .         | .         | .           | .              | .              |
| chr13 | 114103454 | 114103855 | .     | .         | .         | .           | .              | .              |
| chr13 | 114144954 | 114145355 | .     | .         | .         | .           | .              | .              |
| chr13 | 115079728 | 115080129 | chr13 | 115079743 | 115079765 | GC_rich     | Low_complexity | Low_complexity |
| chr14 | 20811435  | 20811836  | .     | .         | .         | .           | .              | .              |
| chr14 | 21457925  | 21458326  | chr14 | 21457885  | 21457929  | (CCCCG)n    | Simple_repeat  | Simple_repeat  |
| chr14 | 21571625  | 21572026  | .     | .         | .         | .           | .              | .              |
| chr14 | 23398650  | 23399051  | chr14 | 23398909  | 23398982  | tRNA-Arg-CG | tRNA           | tRNA           |
| chr14 | 23540555  | 23540956  | .     | .         | .         | .           | .              | .              |
| chr14 | 23564572  | 23564973  | .     | .         | .         | .           | .              | .              |
| chr14 | 23789962  | 23790363  | .     | .         | .         | .           | .              | .              |
| chr14 | 24020837  | 24021238  | chr14 | 24020861  | 24020935  | (TCC)n      | Simple_repeat  | Simple_repeat  |
| chr14 | 24025032  | 24025433  | .     | .         | .         | .           | .              | .              |
| chr14 | 24657969  | 24658370  | .     | .         | .         | .           | .              | .              |
| chr14 | 24701612  | 24702013  | .     | .         | .         | .           | .              | .              |
| chr14 | 24911906  | 24912307  | .     | .         | .         | .           | .              | .              |
| chr14 | 31091258  | 31091659  | chr14 | 31091547  | 31091582  | (CAG)n      | Simple_repeat  | Simple_repeat  |
| chr14 | 31495506  | 31495907  | .     | .         | .         | .           | .              | .              |
| chr14 | 32030429  | 32030830  | chr14 | 32030275  | 32030481  | MIRc        | SINE           | MIR            |
| chr14 | 35183621  | 35184022  | .     | .         | .         | .           | .              | .              |
| chr14 | 35451931  | 35452332  | .     | .         | .         | .           | .              | .              |
| chr14 | 35591510  | 35591911  | .     | .         | .         | .           | .              | .              |
| chr14 | 35761403  | 35761804  | .     | .         | .         | .           | .              | .              |
| chr14 | 36295221  | 36295622  | .     | .         | .         | .           | .              | .              |
| chr14 | 37641090  | 37641491  | .     | .         | .         | .           | .              | .              |
| chr14 | 45431118  | 45431519  | .     | .         | .         | .           | .              | .              |
| chr14 | 45722518  | 45722919  | .     | .         | .         | .           | .              | .              |
| chr14 | 50052902  | 50053303  | chr14 | 50053297  | 50053597  | 7SLRNA      | srpRNA         | srpRNA         |
| chr14 | 50100999  | 50101400  | chr14 | 50101150  | 50101171  | GC_rich     | Low_complexity | Low_complexity |
| chr14 | 51134925  | 51135326  | .     | .         | .         | .           | .              | .              |
| chr14 | 53173785  | 53174186  | .     | .         | .         | .           | .              | .              |
| chr14 | 54907904  | 54908305  | chr14 | 54907870  | 54907911  | GC_rich     | Low_complexity | Low_complexity |
| chr14 | 54907904  | 54908305  | chr14 | 54908290  | 54908784  | L2c         | LINE           | L2             |
| chr14 | 55878377  | 55878778  | .     | .         | .         | .           | .              | .              |

|       |           |           |       |           |           |           |                |                |
|-------|-----------|-----------|-------|-----------|-----------|-----------|----------------|----------------|
| chr14 | 58711313  | 58711714  | chr14 | 58711287  | 58711316  | AT_rich   | Low_complexity | Low_complexity |
| chr14 | 59655112  | 59655513  | .     | .         | .         | .         | .              | .              |
| chr14 | 60558598  | 60558999  | .     | .         | .         | .         | .              | .              |
| chr14 | 64108998  | 64109399  | .     | .         | .         | .         | .              | .              |
| chr14 | 64970153  | 64970554  | .     | .         | .         | .         | .              | .              |
| chr14 | 65453686  | 65454087  | .     | .         | .         | .         | .              | .              |
| chr14 | 65569084  | 65569485  | chr14 | 65569094  | 65569126  | (AGGGGG)n | Simple_repeat  | Simple_repeat  |
| chr14 | 65569084  | 65569485  | chr14 | 65569155  | 65569206  | (CTCA)n   | Simple_repeat  | Simple_repeat  |
| chr14 | 65569084  | 65569485  | chr14 | 65569443  | 65569475  | (G)n      | Simple_repeat  | Simple_repeat  |
| chr14 | 68141381  | 68141782  | chr14 | 68141589  | 68141622  | GC_rich   | Low_complexity | Low_complexity |
| chr14 | 68162330  | 68162731  | .     | .         | .         | .         | .              | .              |
| chr14 | 68286246  | 68286647  | chr14 | 68285962  | 68286274  | AluY      | SINE           | Alu            |
| chr14 | 69658050  | 69658451  | .     | .         | .         | .         | .              | .              |
| chr14 | 69865178  | 69865579  | .     | .         | .         | .         | .              | .              |
| chr14 | 70826273  | 70826674  | .     | .         | .         | .         | .              | .              |
| chr14 | 70883622  | 70884023  | chr14 | 70883994  | 70884623  | MER67C    | LTR            | ERV1           |
| chr14 | 73493798  | 73494199  | .     | .         | .         | .         | .              | .              |
| chr14 | 73525034  | 73525435  | .     | .         | .         | .         | .              | .              |
| chr14 | 73957519  | 73957920  | chr14 | 73957679  | 73957702  | GC_rich   | Low_complexity | Low_complexity |
| chr14 | 74111415  | 74111816  | .     | .         | .         | .         | .              | .              |
| chr14 | 75179609  | 75180010  | .     | .         | .         | .         | .              | .              |
| chr14 | 75469434  | 75469835  | .     | .         | .         | .         | .              | .              |
| chr14 | 75530382  | 75530783  | .     | .         | .         | .         | .              | .              |
| chr14 | 75593574  | 75593975  | .     | .         | .         | .         | .              | .              |
| chr14 | 75643170  | 75643571  | .     | .         | .         | .         | .              | .              |
| chr14 | 77787105  | 77787506  | chr14 | 77787168  | 77787292  | (CGGGG)n  | Simple_repeat  | Simple_repeat  |
| chr14 | 77923831  | 77924232  | .     | .         | .         | .         | .              | .              |
| chr14 | 78174183  | 78174584  | .     | .         | .         | .         | .              | .              |
| chr14 | 78227380  | 78227781  | .     | .         | .         | .         | .              | .              |
| chr14 | 78266196  | 78266597  | .     | .         | .         | .         | .              | .              |
| chr14 | 82000281  | 82000682  | .     | .         | .         | .         | .              | .              |
| chr14 | 90797875  | 90798276  | chr14 | 90797858  | 90797908  | MIRc      | SINE           | MIR            |
| chr14 | 90863087  | 90863488  | chr14 | 90863467  | 90863492  | (CAG)n    | Simple_repeat  | Simple_repeat  |
| chr14 | 92506283  | 92506684  | .     | .         | .         | .         | .              | .              |
| chr14 | 93214909  | 93215310  | chr14 | 93215255  | 93215309  | MER5B     | DNA            | hAT-Charlie    |
| chr14 | 95623798  | 95624199  | .     | .         | .         | .         | .              | .              |
| chr14 | 96000797  | 96001198  | .     | .         | .         | .         | .              | .              |
| chr14 | 96968435  | 96968836  | .     | .         | .         | .         | .              | .              |
| chr14 | 97263382  | 97263783  | .     | .         | .         | .         | .              | .              |
| chr14 | 98444268  | 98444669  | .     | .         | .         | .         | .              | .              |
| chr14 | 102430546 | 102430947 | chr14 | 102430573 | 102430631 | L2b       | LINE           | L2             |
| chr14 | 102430546 | 102430947 | chr14 | 102430761 | 102430795 | GC_rich   | Low_complexity | Low_complexity |
| chr14 | 102430546 | 102430947 | chr14 | 102430828 | 102430862 | GC_rich   | Low_complexity | Low_complexity |
| chr14 | 102553767 | 102554168 | chr14 | 102554102 | 102554186 | CR1_Mam   | LINE           | CR1            |
| chr14 | 102829163 | 102829564 | .     | .         | .         | .         | .              | .              |
| chr14 | 103800130 | 103800531 | .     | .         | .         | .         | .              | .              |
| chr14 | 103995247 | 103995648 | chr14 | 103995177 | 103995320 | FLAM_C    | SINE           | Alu            |
| chr14 | 104095284 | 104095685 | chr14 | 104095456 | 104095522 | (CGGGG)n  | Simple_repeat  | Simple_repeat  |
| chr14 | 104387714 | 104388115 | chr14 | 104388046 | 104388159 | MER81     | DNA            | hAT-Blackjack  |
| chr14 | 104394423 | 104394824 | chr14 | 104394641 | 104394665 | GC_rich   | Low_complexity | Low_complexity |
| chr14 | 105487531 | 105487932 | chr14 | 105487626 | 105487670 | (CCCCG)n  | Simple_repeat  | Simple_repeat  |
| chr15 | 25684007  | 25684408  | chr15 | 25684201  | 25684223  | GC_rich   | Low_complexity | Low_complexity |
| chr15 | 31195894  | 31196295  | .     | .         | .         | .         | .              | .              |
| chr15 | 34393890  | 34394291  | .     | .         | .         | .         | .              | .              |
| chr15 | 34502035  | 34502436  | chr15 | 34501985  | 34502051  | GC_rich   | Low_complexity | Low_complexity |
| chr15 | 34502035  | 34502436  | chr15 | 34502265  | 34502291  | GC_rich   | Low_complexity | Low_complexity |
| chr15 | 34630137  | 34630538  | .     | .         | .         | .         | .              | .              |
| chr15 | 352621806 | 35262207  | .     | .         | .         | .         | .              | .              |
| chr15 | 35280363  | 35280764  | .     | .         | .         | .         | .              | .              |
| chr15 | 36871332  | 36871733  | .     | .         | .         | .         | .              | .              |
| chr15 | 38746159  | 38746560  | chr15 | 38746130  | 38746179  | AT_rich   | Low_complexity | Low_complexity |
| chr15 | 40452969  | 40453370  | .     | .         | .         | .         | .              | .              |
| chr15 | 40986742  | 40987143  | chr15 | 40987101  | 40987186  | FAM       | SINE           | Alu            |
| chr15 | 41099512  | 41099913  | chr15 | 41099900  | 41099938  | G-rich    | Low_complexity | Low_complexity |
| chr15 | 41408694  | 41409095  | .     | .         | .         | .         | .              | .              |
| chr15 | 41694497  | 41694898  | .     | .         | .         | .         | .              | .              |
| chr15 | 41836259  | 41836660  | chr15 | 41836645  | 41836947  | AluX1     | SINE           | Alu            |
| chr15 | 43213065  | 43213466  | .     | .         | .         | .         | .              | .              |
| chr15 | 44067609  | 44068010  | .     | .         | .         | .         | .              | .              |
| chr15 | 44093020  | 44093421  | chr15 | 44093173  | 44093266  | L1ME5     | LINE           | L1             |
| chr15 | 44116749  | 44117150  | .     | .         | .         | .         | .              | .              |
| chr15 | 45694271  | 45694672  | .     | .         | .         | .         | .              | .              |
| chr15 | 48623458  | 48623859  | .     | .         | .         | .         | .              | .              |
| chr15 | 49447650  | 49448051  | chr15 | 49447645  | 49447667  | GC_rich   | Low_complexity | Low_complexity |
| chr15 | 49913027  | 49913428  | .     | .         | .         | .         | .              | .              |
| chr15 | 50647167  | 50647568  | .     | .         | .         | .         | .              | .              |
| chr15 | 50716392  | 50716793  | .     | .         | .         | .         | .              | .              |
| chr15 | 52043541  | 52043942  | chr15 | 52043754  | 52043785  | GC_rich   | Low_complexity | Low_complexity |
| chr15 | 52121605  | 52122006  | .     | .         | .         | .         | .              | .              |
| chr15 | 52821151  | 52821552  | chr15 | 52821102  | 52821162  | (CGGGG)n  | Simple_repeat  | Simple_repeat  |
| chr15 | 52821151  | 52821552  | chr15 | 52821256  | 52821329  | (CCG)n    | Simple_repeat  | Simple_repeat  |
| chr15 | 52861208  | 52861609  | .     | .         | .         | .         | .              | .              |
| chr15 | 55488910  | 55489311  | .     | .         | .         | .         | .              | .              |
| chr15 | 55700375  | 55700776  | .     | .         | .         | .         | .              | .              |
| chr15 | 57025624  | 57026025  | chr15 | 57025627  | 57025651  | GC_rich   | Low_complexity | Low_complexity |
| chr15 | 57025624  | 57026025  | chr15 | 57025689  | 57025725  | (GGA)n    | Simple_repeat  | Simple_repeat  |
| chr15 | 59949533  | 59949934  | .     | .         | .         | .         | .              | .              |
| chr15 | 59981290  | 59981691  | chr15 | 59981563  | 59981611  | (CGG)n    | Simple_repeat  | Simple_repeat  |
| chr15 | 63481417  | 63481818  | .     | .         | .         | .         | .              | .              |
| chr15 | 64386014  | 64386415  | .     | .         | .         | .         | .              | .              |
| chr15 | 64455331  | 64455732  | .     | .         | .         | .         | .              | .              |
| chr15 | 64648229  | 64648630  | chr15 | 64648291  | 64648347  | G-rich    | Low_complexity | Low_complexity |
| chr15 | 64679830  | 64680231  | .     | .         | .         | .         | .              | .              |
| chr15 | 64995403  | 64995804  | chr15 | 64995425  | 64995464  | (CCG)n    | Simple_repeat  | Simple_repeat  |
| chr15 | 65477788  | 65478189  | .     | .         | .         | .         | .              | .              |
| chr15 | 65809817  | 65810218  | .     | .         | .         | .         | .              | .              |
| chr15 | 65903256  | 65903657  | .     | .         | .         | .         | .              | .              |
| chr15 | 66161537  | 66161938  | chr15 | 66161732  | 66161753  | GC_rich   | Low_complexity | Low_complexity |
| chr15 | 67834747  | 67835148  | chr15 | 67834873  | 67834895  | GC_rich   | Low_complexity | Low_complexity |
| chr15 | 67834747  | 67835148  | chr15 | 67835059  | 67835096  | (CCG)n    | Simple_repeat  | Simple_repeat  |
| chr15 | 68569436  | 68569837  | chr15 | 68569392  | 68569469  | L2a       | LINE           | L2             |
| chr15 | 69744174  | 69744575  | chr15 | 69744493  | 69744688  | MIRb      | SINE           | MIR            |
| chr15 | 72668227  | 72668628  | .     | .         | .         | .         | .              | .              |
| chr15 | 74611018  | 74611419  | .     | .         | .         | .         | .              | .              |
| chr15 | 74753347  | 74753748  | chr15 | 74753217  | 74753364  | MIRb      | SINE           | MIR            |



|       |           |           |       |           |           |             |                |                |
|-------|-----------|-----------|-------|-----------|-----------|-------------|----------------|----------------|
| chr15 | 74908096  | 74908497  | chr15 | 74908259  | 74908285  | (CGG)n      | Simple_repeat  | Simple_repeat  |
| chr15 | 75182167  | 75182568  | chr15 | 75181678  | 75182250  | L2a         | LINE           | L2             |
| chr15 | 75315653  | 75316054  | chr15 | 75315646  | 75315669  | (A)n        | Simple_repeat  | Simple_repeat  |
| chr15 | 75639716  | 75640117  | .     | .         | .         | .           | .              | .              |
| chr15 | 75918057  | 75918458  | .     | .         | .         | .           | .              | .              |
| chr15 | 77712847  | 77713248  | .     | .         | .         | .           | .              | .              |
| chr15 | 78369927  | 78370328  | chr15 | 78369908  | 78370079  | C-rich      | Low_complexity | Low_complexity |
| chr15 | 78369927  | 78370328  | chr15 | 78370130  | 78370153  | GC_rich     | Low_complexity | Low_complexity |
| chr15 | 78369927  | 78370328  | chr15 | 78370248  | 78370367  | L1ME2z      | LINE           | L1             |
| chr15 | 79164946  | 79165347  | chr15 | 79165058  | 79165097  | GC_rich     | Low_complexity | Low_complexity |
| chr15 | 79164946  | 79165347  | chr15 | 79165133  | 79165170  | GC_rich     | Low_complexity | Low_complexity |
| chr15 | 82554867  | 82555268  | chr15 | 82555046  | 82555074  | GC_rich     | Low_complexity | Low_complexity |
| chr15 | 85143927  | 85144328  | chr15 | 85143883  | 85143982  | MIR3        | SINE           | MIR            |
| chr15 | 85174432  | 85174833  | .     | .         | .         | .           | .              | .              |
| chr15 | 85259203  | 85259604  | .     | .         | .         | .           | .              | .              |
| chr15 | 89010413  | 89010814  | .     | .         | .         | .           | .              | .              |
| chr15 | 89877933  | 89878334  | chr15 | 89878303  | 89878376  | tRNA-Arg-CG | tRNA           | tRNA           |
| chr15 | 90437095  | 90437496  | .     | .         | .         | .           | .              | .              |
| chr15 | 90895180  | 90895581  | .     | .         | .         | .           | .              | .              |
| chr15 | 93447294  | 93447695  | chr15 | 93447518  | 93447541  | GC_rich     | Low_complexity | Low_complexity |
| chr15 | 100273201 | 100273602 | .     | .         | .         | .           | .              | .              |
| chr15 | 101142648 | 101143049 | .     | .         | .         | .           | .              | .              |
| chr15 | 101835247 | 101835648 | .     | .         | .         | .           | .              | .              |
| chr15 | 102192513 | 102192914 | chr15 | 102192585 | 102192609 | GC_rich     | Low_complexity | Low_complexity |
| chr16 | 279287    | 279688    | chr16 | 279682    | 279815    | MIR         | SINE           | MIR            |
| chr16 | 577411    | 577812    | chr16 | 577734    | 577785    | GC_rich     | Low_complexity | Low_complexity |
| chr16 | 577411    | 577812    | chr16 | 577806    | 577865    | GC_rich     | Low_complexity | Low_complexity |
| chr16 | 686227    | 686628    | .     | .         | .         | .           | .              | .              |
| chr16 | 734161    | 734562    | chr16 | 734118    | 734256    | C-rich      | Low_complexity | Low_complexity |
| chr16 | 1401692   | 1402093   | .     | .         | .         | .           | .              | .              |
| chr16 | 1524941   | 1525342   | .     | .         | .         | .           | .              | .              |
| chr16 | 2009290   | 2009691   | chr16 | 2009282   | 2009394   | L2a         | LINE           | L2             |
| chr16 | 2009290   | 2009691   | chr16 | 2009420   | 2009474   | GC_rich     | Low_complexity | Low_complexity |
| chr16 | 2021826   | 2022227   | .     | .         | .         | .           | .              | .              |
| chr16 | 2034006   | 2034407   | chr16 | 2033987   | 2034113   | C-rich      | Low_complexity | Low_complexity |
| chr16 | 2034006   | 2034407   | chr16 | 2034317   | 2034342   | GC_rich     | Low_complexity | Low_complexity |
| chr16 | 2097682   | 2098083   | chr16 | 2098032   | 2098067   | GC_rich     | Low_complexity | Low_complexity |
| chr16 | 2205488   | 2205889   | chr16 | 2205825   | 2205860   | GC_rich     | Low_complexity | Low_complexity |
| chr16 | 2255819   | 2256220   | chr16 | 2255831   | 2255973   | MIRc        | SINE           | MIR            |
| chr16 | 2653229   | 2653630   | .     | .         | .         | .           | .              | .              |
| chr16 | 2732315   | 2732716   | chr16 | 2732577   | 2732619   | GC_rich     | Low_complexity | Low_complexity |
| chr16 | 2802169   | 2802570   | .     | .         | .         | .           | .              | .              |
| chr16 | 2827196   | 2827597   | chr16 | 2827187   | 2827373   | (CCCCG)n    | Simple_repeat  | Simple_repeat  |
| chr16 | 3074113   | 3074514   | .     | .         | .         | .           | .              | .              |
| chr16 | 3162341   | 3162742   | .     | .         | .         | .           | .              | .              |
| chr16 | 3184759   | 3185160   | chr16 | 3185099   | 3185140   | (CGGGGG)n   | Simple_repeat  | Simple_repeat  |
| chr16 | 3285149   | 3285550   | chr16 | 3285518   | 3285929   | C-rich      | Low_complexity | Low_complexity |
| chr16 | 3314385   | 3314786   | .     | .         | .         | .           | .              | .              |
| chr16 | 3332712   | 3333113   | chr16 | 3333095   | 3333220   | MER5A       | DNA            | hAT-Charlie    |
| chr16 | 3450867   | 3451268   | .     | .         | .         | .           | .              | .              |
| chr16 | 4321716   | 4322117   | chr16 | 4321999   | 4322020   | GC_rich     | Low_complexity | Low_complexity |
| chr16 | 4321716   | 4322117   | chr16 | 4322039   | 4322078   | GC_rich     | Low_complexity | Low_complexity |
| chr16 | 4475365   | 4475766   | .     | .         | .         | .           | .              | .              |
| chr16 | 4588430   | 4588831   | chr16 | 4588562   | 4588594   | GC_rich     | Low_complexity | Low_complexity |
| chr16 | 4664754   | 4665155   | chr16 | 4664975   | 4665006   | GC_rich     | Low_complexity | Low_complexity |
| chr16 | 4674520   | 4674921   | .     | .         | .         | .           | .              | .              |
| chr16 | 4784102   | 4784503   | .     | .         | .         | .           | .              | .              |
| chr16 | 4817058   | 4817459   | chr16 | 4817412   | 4817449   | MLT1D       | LTR            | ERV1-MaLR      |
| chr16 | 4817058   | 4817459   | chr16 | 4817449   | 4817717   | AluSp       | SINE           | Alu            |
| chr16 | 4818688   | 4819089   | chr16 | 4819034   | 4819113   | MIRb        | SINE           | MIR            |
| chr16 | 4897115   | 4897516   | .     | .         | .         | .           | .              | .              |
| chr16 | 8891417   | 8891818   | .     | .         | .         | .           | .              | .              |
| chr16 | 9183837   | 9184238   | chr16 | 9183784   | 9184125   | L2a         | LINE           | L2             |
| chr16 | 11038147  | 11038548  | .     | .         | .         | .           | .              | .              |
| chr16 | 11679548  | 11679949  | .     | .         | .         | .           | .              | .              |
| chr16 | 12009775  | 12010176  | .     | .         | .         | .           | .              | .              |
| chr16 | 12070286  | 12070687  | chr16 | 12070548  | 12070574  | GC_rich     | Low_complexity | Low_complexity |
| chr16 | 12070286  | 12070687  | chr16 | 12070600  | 12070648  | (CGG)n      | Simple_repeat  | Simple_repeat  |
| chr16 | 14013865  | 14014266  | .     | .         | .         | .           | .              | .              |
| chr16 | 15149887  | 15150288  | chr16 | 15149882  | 15149952  | (CCCCG)n    | Simple_repeat  | Simple_repeat  |
| chr16 | 15736941  | 15737342  | chr16 | 15736869  | 15737028  | C-rich      | Low_complexity | Low_complexity |
| chr16 | 15736941  | 15737342  | chr16 | 15737119  | 15737147  | GC_rich     | Low_complexity | Low_complexity |
| chr16 | 15981911  | 15982312  | chr16 | 15981682  | 15981950  | AluJr       | SINE           | Alu            |
| chr16 | 15981911  | 15982312  | chr16 | 15981965  | 15982044  | MIRb        | SINE           | MIR            |
| chr16 | 18801474  | 18801875  | chr16 | 18801872  | 18802161  | AluSc       | SINE           | Alu            |
| chr16 | 18812717  | 18813118  | .     | .         | .         | .           | .              | .              |
| chr16 | 18937597  | 18937998  | .     | .         | .         | .           | .              | .              |
| chr16 | 19534934  | 19535335  | .     | .         | .         | .           | .              | .              |
| chr16 | 19729345  | 19729746  | .     | .         | .         | .           | .              | .              |
| chr16 | 20817543  | 20817944  | .     | .         | .         | .           | .              | .              |
| chr16 | 21513419  | 21513820  | .     | .         | .         | .           | .              | .              |
| chr16 | 21964504  | 21964905  | .     | .         | .         | .           | .              | .              |
| chr16 | 22019151  | 22019552  | chr16 | 22019443  | 22019555  | GC_rich     | Low_complexity | Low_complexity |
| chr16 | 22308487  | 22308888  | chr16 | 22308460  | 22308542  | tRNA-Leu-CT | tRNA           | tRNA           |
| chr16 | 22448174  | 22448575  | chr16 | 22448562  | 22448622  | CT-rich     | Low_complexity | Low_complexity |
| chr16 | 23160658  | 23161059  | chr16 | 23160615  | 23160661  | GC_rich     | Low_complexity | Low_complexity |
| chr16 | 23160658  | 23161059  | chr16 | 23160740  | 23160775  | GC_rich     | Low_complexity | Low_complexity |
| chr16 | 23160658  | 23161059  | chr16 | 23160808  | 23160830  | GC_rich     | Low_complexity | Low_complexity |
| chr16 | 23568807  | 23569208  | chr16 | 23569094  | 23569125  | GC_rich     | Low_complexity | Low_complexity |
| chr16 | 23607413  | 23607814  | .     | .         | .         | .           | .              | .              |
| chr16 | 23652548  | 23652949  | .     | .         | .         | .           | .              | .              |
| chr16 | 23689882  | 23690283  | .     | .         | .         | .           | .              | .              |
| chr16 | 24740638  | 24741039  | chr16 | 24740622  | 24740642  | (T)n        | Simple_repeat  | Simple_repeat  |
| chr16 | 24740638  | 24741039  | chr16 | 24740989  | 24741044  | (CGG)n      | Simple_repeat  | Simple_repeat  |
| chr16 | 25042644  | 25043045  | chr16 | 25042654  | 25042726  | MIRb        | SINE           | MIR            |
| chr16 | 25122727  | 25123128  | .     | .         | .         | .           | .              | .              |
| chr16 | 25268839  | 25269240  | chr16 | 25269202  | 25269265  | GC_rich     | Low_complexity | Low_complexity |
| chr16 | 28565026  | 28565427  | chr16 | 28565040  | 28565062  | (TTTA)n     | Simple_repeat  | Simple_repeat  |
| chr16 | 28857708  | 28858109  | .     | .         | .         | .           | .              | .              |
| chr16 | 28874577  | 28874978  | chr16 | 28874569  | 28874615  | C-rich      | Low_complexity | Low_complexity |
| chr16 | 28891054  | 28891455  | .     | .         | .         | .           | .              | .              |
| chr16 | 28961785  | 28962186  | chr16 | 28961637  | 28961906  | AluSz       | SINE           | Alu            |
| chr16 | 30007277  | 30007678  | .     | .         | .         | .           | .              | .              |
| chr16 | 30103107  | 30103508  | .     | .         | .         | .           | .              | .              |
| chr16 | 30198333  | 30198734  | .     | .         | .         | .           | .              | .              |

|       |          |          |       |          |          |             |                |                |   |
|-------|----------|----------|-------|----------|----------|-------------|----------------|----------------|---|
| chr16 | 30366401 | 30366802 | .     | .        | .        | .           | .              | .              | . |
| chr16 | 30546055 | 30546456 | .     | .        | .        | .           | .              | .              | . |
| chr16 | 30569531 | 30569932 | .     | .        | .        | .           | .              | .              | . |
| chr16 | 30596860 | 30597261 | chr16 | 30596901 | 30596930 | GC_rich     | Low_complexity | Low_complexity |   |
| chr16 | 30709193 | 30709594 | chr16 | 30709505 | 30709533 | (TGG)n      | Simple_repeat  | Simple_repeat  |   |
| chr16 | 30797807 | 30798208 | chr16 | 30797923 | 30797947 | GC_rich     | Low_complexity | Low_complexity |   |
| chr16 | 30797807 | 30798208 | chr16 | 30798141 | 30798226 | C-rich      | Low_complexity | Low_complexity |   |
| chr16 | 30908313 | 30908714 | .     | .        | .        | .           | .              | .              | . |
| chr16 | 30933750 | 30934151 | .     | .        | .        | .           | .              | .              | . |
| chr16 | 31045514 | 31045915 | chr16 | 31045867 | 31046036 | MIR3        | SINE           | MIR            |   |
| chr16 | 31085430 | 31085831 | chr16 | 31085809 | 31085870 | C-rich      | Low_complexity | Low_complexity |   |
| chr16 | 31106082 | 31106483 | chr16 | 31106370 | 31106675 | AluX        | SINE           | Alu            |   |
| chr16 | 31119475 | 31119876 | .     | .        | .        | .           | .              | .              | . |
| chr16 | 31128789 | 31129190 | .     | .        | .        | .           | .              | .              | . |
| chr16 | 31453964 | 31454365 | .     | .        | .        | .           | .              | .              | . |
| chr16 | 31470491 | 31470892 | .     | .        | .        | .           | .              | .              | . |
| chr16 | 33963043 | 33963444 | chr16 | 33962496 | 33964361 | SSU-rRNA_Hi | rRNA           | rRNA           |   |
| chr16 | 46917960 | 46918361 | chr16 | 46918263 | 46918295 | GC_rich     | Low_complexity | Low_complexity |   |
| chr16 | 47007423 | 47007824 | .     | .        | .        | .           | .              | .              | . |
| chr16 | 53468102 | 53468503 | chr16 | 53468357 | 53468399 | GC_rich     | Low_complexity | Low_complexity |   |
| chr16 | 53737693 | 53738094 | .     | .        | .        | .           | .              | .              | . |
| chr16 | 54963033 | 54963434 | .     | .        | .        | .           | .              | .              | . |
| chr16 | 56485215 | 56485616 | .     | .        | .        | .           | .              | .              | . |
| chr16 | 56763827 | 56764228 | chr16 | 56763919 | 56763971 | C-rich      | Low_complexity | Low_complexity |   |
| chr16 | 57728511 | 57728912 | chr16 | 57728411 | 57728544 | FLAM_C      | SINE           | Alu            |   |
| chr16 | 58426548 | 58426949 | .     | .        | .        | .           | .              | .              | . |
| chr16 | 58718495 | 58718896 | .     | .        | .        | .           | .              | .              | . |
| chr16 | 67260751 | 67261152 | .     | .        | .        | .           | .              | .              | . |
| chr16 | 67313224 | 67313625 | chr16 | 67313195 | 67313233 | GC_rich     | Low_complexity | Low_complexity |   |
| chr16 | 67313224 | 67313625 | chr16 | 67313361 | 67313396 | GC_rich     | Low_complexity | Low_complexity |   |
| chr16 | 67596071 | 67596472 | chr16 | 67596329 | 67596401 | C-rich      | Low_complexity | Low_complexity |   |
| chr16 | 67700500 | 67700901 | chr16 | 67700398 | 67700577 | C-rich      | Low_complexity | Low_complexity |   |
| chr16 | 67840446 | 67840847 | .     | .        | .        | .           | .              | .              | . |
| chr16 | 67875704 | 67876105 | .     | .        | .        | .           | .              | .              | . |
| chr16 | 67880513 | 67880914 | .     | .        | .        | .           | .              | .              | . |
| chr16 | 68118817 | 68119218 | chr16 | 68119096 | 68119119 | GC_rich     | Low_complexity | Low_complexity |   |
| chr16 | 68344652 | 68345053 | .     | .        | .        | .           | .              | .              | . |
| chr16 | 68482481 | 68482882 | chr16 | 68482876 | 68482911 | MIR3        | SINE           | MIR            |   |
| chr16 | 68572915 | 68573316 | .     | .        | .        | .           | .              | .              | . |
| chr16 | 69364324 | 69364725 | .     | .        | .        | .           | .              | .              | . |
| chr16 | 69419746 | 69420147 | chr16 | 69419758 | 69419794 | GC_rich     | Low_complexity | Low_complexity |   |
| chr16 | 69419746 | 69420147 | chr16 | 69420113 | 69420423 | AluSp       | SINE           | Alu            |   |
| chr16 | 69458348 | 69458749 | .     | .        | .        | .           | .              | .              | . |
| chr16 | 70285682 | 70286083 | .     | .        | .        | .           | .              | .              | . |
| chr16 | 70473063 | 70473464 | chr16 | 70473003 | 70473083 | C-rich      | Low_complexity | Low_complexity |   |
| chr16 | 70488190 | 70488591 | .     | .        | .        | .           | .              | .              | . |
| chr16 | 72127638 | 72128039 | .     | .        | .        | .           | .              | .              | . |
| chr16 | 74330478 | 74330879 | .     | .        | .        | .           | .              | .              | . |
| chr16 | 75019013 | 75019414 | chr16 | 75019372 | 75019656 | AluSq2      | SINE           | Alu            |   |
| chr16 | 75182116 | 75182517 | .     | .        | .        | .           | .              | .              | . |
| chr16 | 75467292 | 75467693 | chr16 | 75467576 | 75468022 | MER82       | DNA            | TcMar-Tigger   |   |
| chr16 | 75657040 | 75657441 | chr16 | 75657418 | 75657541 | AluX        | SINE           | Alu            |   |
| chr16 | 75681433 | 75681834 | .     | .        | .        | .           | .              | .              | . |
| chr16 | 78133041 | 78133442 | .     | .        | .        | .           | .              | .              | . |
| chr16 | 83841367 | 83841768 | .     | .        | .        | .           | .              | .              | . |
| chr16 | 85045018 | 85045419 | .     | .        | .        | .           | .              | .              | . |
| chr16 | 85833077 | 85833478 | chr16 | 85833379 | 85833416 | GC_rich     | Low_complexity | Low_complexity |   |
| chr16 | 87984455 | 87984856 | .     | .        | .        | .           | .              | .              | . |
| chr16 | 89387246 | 89387647 | .     | .        | .        | .           | .              | .              | . |
| chr16 | 89626880 | 89627281 | chr16 | 89627277 | 89627313 | GC_rich     | Low_complexity | Low_complexity |   |
| chr16 | 89753104 | 89753505 | chr16 | 89753335 | 89753371 | GC_rich     | Low_complexity | Low_complexity |   |
| chr16 | 90039043 | 90039444 | chr16 | 90039246 | 90039283 | GC_rich     | Low_complexity | Low_complexity |   |
| chr17 | 617967   | 618368   | .     | .        | .        | .           | .              | .              | . |
| chr17 | 655248   | 655649   | .     | .        | .        | .           | .              | .              | . |
| chr17 | 685379   | 685780   | .     | .        | .        | .           | .              | .              | . |
| chr17 | 900078   | 900479   | .     | .        | .        | .           | .              | .              | . |
| chr17 | 1359411  | 1359812  | chr17 | 1359439  | 1359483  | GC_rich     | Low_complexity | Low_complexity |   |
| chr17 | 1419969  | 1420370  | .     | .        | .        | .           | .              | .              | . |
| chr17 | 1619665  | 1620066  | .     | .        | .        | .           | .              | .              | . |
| chr17 | 1732967  | 1733368  | .     | .        | .        | .           | .              | .              | . |
| chr17 | 2239555  | 2239956  | .     | .        | .        | .           | .              | .              | . |
| chr17 | 2614872  | 2615273  | chr17 | 2614795  | 2614890  | C-rich      | Low_complexity | Low_complexity |   |
| chr17 | 3116917  | 3117318  | chr17 | 3116832  | 3117051  | MLT1J1      | LTR            | ERV1-MaLR      |   |
| chr17 | 3116917  | 3117318  | chr17 | 3117076  | 3117185  | MLT1J1      | LTR            | ERV1-MaLR      |   |
| chr17 | 3116917  | 3117318  | chr17 | 3117225  | 3117409  | L2          | LINE           | L2             |   |
| chr17 | 3539751  | 3540152  | .     | .        | .        | .           | .              | .              | . |
| chr17 | 3571943  | 3572344  | .     | .        | .        | .           | .              | .              | . |
| chr17 | 4634412  | 4634813  | chr17 | 4634205  | 4634481  | AluX1       | SINE           | Alu            |   |
| chr17 | 4699207  | 4699608  | chr17 | 4698992  | 4699233  | AluSg       | SINE           | Alu            |   |
| chr17 | 4843181  | 4843582  | .     | .        | .        | .           | .              | .              | . |
| chr17 | 5323226  | 5323627  | chr17 | 5323248  | 5323312  | L2          | LINE           | L2             |   |
| chr17 | 5372153  | 5372554  | chr17 | 5372496  | 5372810  | AluSp       | SINE           | Alu            |   |
| chr17 | 5389900  | 5390301  | .     | .        | .        | .           | .              | .              | . |
| chr17 | 6543940  | 6544341  | .     | .        | .        | .           | .              | .              | . |
| chr17 | 6554756  | 6555157  | .     | .        | .        | .           | .              | .              | . |
| chr17 | 6915709  | 6916110  | .     | .        | .        | .           | .              | .              | . |
| chr17 | 7122942  | 7123343  | .     | .        | .        | .           | .              | .              | . |
| chr17 | 7142851  | 7143252  | chr17 | 7142819  | 7142880  | CT-rich     | Low_complexity | Low_complexity |   |
| chr17 | 7155577  | 7155978  | .     | .        | .        | .           | .              | .              | . |
| chr17 | 7212053  | 7212454  | .     | .        | .        | .           | .              | .              | . |
| chr17 | 7218505  | 7218906  | chr17 | 7218461  | 7218518  | GC_rich     | Low_complexity | Low_complexity |   |
| chr17 | 7218505  | 7218906  | chr17 | 7218569  | 7218599  | GC_rich     | Low_complexity | Low_complexity |   |
| chr17 | 7338426  | 7338827  | .     | .        | .        | .           | .              | .              | . |
| chr17 | 7387444  | 7387845  | .     | .        | .        | .           | .              | .              | . |
| chr17 | 7591422  | 7591823  | chr17 | 7591167  | 7591442  | L2a         | LINE           | L2             |   |
| chr17 | 7760432  | 7760833  | .     | .        | .        | .           | .              | .              | . |
| chr17 | 8286465  | 8286866  | .     | .        | .        | .           | .              | .              | . |
| chr17 | 12692560 | 12692961 | .     | .        | .        | .           | .              | .              | . |
| chr17 | 15587428 | 15587829 | chr17 | 15587665 | 15587716 | AluYb8      | SINE           | Alu            |   |
| chr17 | 15587428 | 15587829 | chr17 | 15587755 | 15588052 | AluX1       | SINE           | Alu            |   |
| chr17 | 15602789 | 15603190 | .     | .        | .        | .           | .              | .              | . |
| chr17 | 16120332 | 16120733 | .     | .        | .        | .           | .              | .              | . |
| chr17 | 16284187 | 16284588 | .     | .        | .        | .           | .              | .              | . |
| chr17 | 16342058 | 16342459 | chr17 | 16341933 | 16342115 | MIRb        | SINE           | MIR            |   |
| chr17 | 16557008 | 16557409 | .     | .        | .        | .           | .              | .              | . |

|       |          |          |       |          |          |          |                |                |
|-------|----------|----------|-------|----------|----------|----------|----------------|----------------|
| chr17 | 17494862 | 17495263 | .     | .        | .        | .        | .              |                |
| chr17 | 17942412 | 17942813 | chr17 | 17942719 | 17942785 | (TG)n    | Simple_repeat  | Simple_repeat  |
| chr17 | 17990989 | 17991390 | .     | .        | .        | .        | .              | .              |
| chr17 | 18128477 | 18128878 | chr17 | 18128294 | 18128512 | L2b      | LINE           | L2             |
| chr17 | 18128477 | 18128878 | chr17 | 18128449 | 18128525 | MIR      | SINE           | MIR            |
| chr17 | 18128477 | 18128878 | chr17 | 18128830 | 18128973 | GC_rich  | Low_complexity | Low_complexity |
| chr17 | 18218174 | 18218575 | .     | .        | .        | .        | .              | .              |
| chr17 | 18585376 | 18585777 | .     | .        | .        | .        | .              | .              |
| chr17 | 19881016 | 19881417 | .     | .        | .        | .        | .              | .              |
| chr17 | 21117393 | 21117794 | chr17 | 21117623 | 21117651 | GC_rich  | Low_complexity | Low_complexity |
| chr17 | 21904676 | 21905077 | .     | .        | .        | .        | .              | .              |
| chr17 | 22020520 | 22020921 | .     | .        | .        | .        | .              | .              |
| chr17 | 26554581 | 26554982 | .     | .        | .        | .        | .              | .              |
| chr17 | 26662375 | 26662776 | .     | .        | .        | .        | .              | .              |
| chr17 | 26684346 | 26684747 | .     | .        | .        | .        | .              | .              |
| chr17 | 27046708 | 27047109 | chr17 | 27046650 | 27046811 | AluY     | SINE           | Alu            |
| chr17 | 27181826 | 27182227 | .     | .        | .        | .        | .              | .              |
| chr17 | 27279228 | 27279629 | .     | .        | .        | .        | .              | .              |
| chr17 | 27919900 | 27920301 | chr17 | 27920228 | 27920310 | GC_rich  | Low_complexity | Low_complexity |
| chr17 | 28804133 | 28804534 | .     | .        | .        | .        | .              | .              |
| chr17 | 30263568 | 30263969 | chr17 | 30263309 | 30263605 | AluSx3   | SINE           | Alu            |
| chr17 | 30669005 | 30669406 | .     | .        | .        | .        | .              | .              |
| chr17 | 30676954 | 30677355 | .     | .        | .        | .        | .              | .              |
| chr17 | 30771247 | 30771648 | chr17 | 30771498 | 30771563 | (CGG)n   | Simple_repeat  | Simple_repeat  |
| chr17 | 30771247 | 30771648 | chr17 | 30771640 | 30771671 | GC_rich  | Low_complexity | Low_complexity |
| chr17 | 33905424 | 33905825 | .     | .        | .        | .        | .              | .              |
| chr17 | 35969247 | 35969648 | .     | .        | .        | .        | .              | .              |
| chr17 | 36003196 | 36003597 | .     | .        | .        | .        | .              | .              |
| chr17 | 36349798 | 36350199 | chr17 | 36349859 | 36349884 | (TCCA)n  | Simple_repeat  | Simple_repeat  |
| chr17 | 36452952 | 36453353 | .     | .        | .        | .        | .              | .              |
| chr17 | 36858455 | 36858856 | chr17 | 36858604 | 36858642 | GC_rich  | Low_complexity | Low_complexity |
| chr17 | 36858455 | 36858856 | chr17 | 36858834 | 36858987 | MIRb     | SINE           | MIR            |
| chr17 | 36908650 | 36909051 | chr17 | 36908591 | 36908653 | L2a      | LINE           | L2             |
| chr17 | 36981396 | 36981797 | .     | .        | .        | .        | .              | .              |
| chr17 | 37009837 | 37010238 | .     | .        | .        | .        | .              | .              |
| chr17 | 37123615 | 37124016 | .     | .        | .        | .        | .              | .              |
| chr17 | 37617458 | 37617859 | .     | .        | .        | .        | .              | .              |
| chr17 | 37844114 | 37844515 | .     | .        | .        | .        | .              | .              |
| chr17 | 38083723 | 38084124 | chr17 | 38084108 | 38084255 | MIRc     | SINE           | MIR            |
| chr17 | 38136850 | 38137251 | chr17 | 38137239 | 38137260 | GC_rich  | Low_complexity | Low_complexity |
| chr17 | 38210542 | 38210943 | .     | .        | .        | .        | .              | .              |
| chr17 | 38256834 | 38257235 | .     | .        | .        | .        | .              | .              |
| chr17 | 38296564 | 38296965 | chr17 | 38296570 | 38296683 | (CA)n    | Simple_repeat  | Simple_repeat  |
| chr17 | 38296564 | 38296965 | chr17 | 38296869 | 38296939 | (CGG)n   | Simple_repeat  | Simple_repeat  |
| chr17 | 38443656 | 38444057 | chr17 | 38443641 | 38443719 | MIRb     | SINE           | MIR            |
| chr17 | 39844831 | 39845232 | .     | .        | .        | .        | .              | .              |
| chr17 | 40021508 | 40021909 | chr17 | 40021579 | 40021621 | (CCG)n   | Simple_repeat  | Simple_repeat  |
| chr17 | 40021508 | 40021909 | chr17 | 40021707 | 40021742 | GC_rich  | Low_complexity | Low_complexity |
| chr17 | 40075172 | 40075573 | chr17 | 40075434 | 40075458 | GC_rich  | Low_complexity | Low_complexity |
| chr17 | 40117877 | 40118278 | chr17 | 40117977 | 40118172 | MIRb     | SINE           | MIR            |
| chr17 | 40273235 | 40273636 | chr17 | 40273157 | 40273304 | (CTGGG)n | Simple_repeat  | Simple_repeat  |
| chr17 | 40306920 | 40307321 | chr17 | 40307267 | 40307560 | AluSx    | SINE           | Alu            |
| chr17 | 40713982 | 40714383 | .     | .        | .        | .        | .              | .              |
| chr17 | 40925259 | 40925660 | .     | .        | .        | .        | .              | .              |
| chr17 | 40950572 | 40950973 | .     | .        | .        | .        | .              | .              |
| chr17 | 41150205 | 41150606 | .     | .        | .        | .        | .              | .              |
| chr17 | 41277917 | 41278318 | .     | .        | .        | .        | .              | .              |
| chr17 | 41322495 | 41322896 | .     | .        | .        | .        | .              | .              |
| chr17 | 41465998 | 41466399 | chr17 | 41466224 | 41466581 | L2c      | LINE           | L2             |
| chr17 | 41561153 | 41561554 | .     | .        | .        | .        | .              | .              |
| chr17 | 42092204 | 42092605 | chr17 | 42092588 | 42092749 | MIRb     | SINE           | MIR            |
| chr17 | 42147804 | 42148205 | chr17 | 42147815 | 42147857 | (T)n     | Simple_repeat  | Simple_repeat  |
| chr17 | 42264221 | 42264622 | .     | .        | .        | .        | .              | .              |
| chr17 | 42275583 | 42275984 | .     | .        | .        | .        | .              | .              |
| chr17 | 42580794 | 42581195 | chr17 | 42581143 | 42581206 | MIR      | SINE           | MIR            |
| chr17 | 42766955 | 42767356 | chr17 | 42767284 | 42767436 | MIRb     | SINE           | MIR            |
| chr17 | 43138346 | 43138747 | .     | .        | .        | .        | .              | .              |
| chr17 | 43225544 | 43225945 | chr17 | 43225855 | 43225962 | G-rich   | Low_complexity | Low_complexity |
| chr17 | 43238982 | 43239383 | .     | .        | .        | .        | .              | .              |
| chr17 | 44271336 | 44271737 | chr17 | 44271519 | 44271542 | GC_rich  | Low_complexity | Low_complexity |
| chr17 | 45266347 | 45266748 | .     | .        | .        | .        | .              | .              |
| chr17 | 45401153 | 45401554 | chr17 | 45401302 | 45401330 | GC_rich  | Low_complexity | Low_complexity |
| chr17 | 45569675 | 45570076 | .     | .        | .        | .        | .              | .              |
| chr17 | 45726613 | 45727014 | chr17 | 45726473 | 45726623 | MIR3     | SINE           | MIR            |
| chr17 | 45908722 | 45909123 | chr17 | 45908379 | 45908775 | L2b      | LINE           | L2             |
| chr17 | 45918432 | 45918833 | .     | .        | .        | .        | .              | .              |
| chr17 | 45973090 | 45973491 | .     | .        | .        | .        | .              | .              |
| chr17 | 46124961 | 46125362 | .     | .        | .        | .        | .              | .              |
| chr17 | 46178697 | 46179098 | chr17 | 46179030 | 46179331 | AluSx1   | SINE           | Alu            |
| chr17 | 46184898 | 46185299 | .     | .        | .        | .        | .              | .              |
| chr17 | 46908125 | 46908526 | chr17 | 46907850 | 46908169 | AluJb    | SINE           | Alu            |
| chr17 | 46969572 | 46969973 | .     | .        | .        | .        | .              | .              |
| chr17 | 47492211 | 47492612 | .     | .        | .        | .        | .              | .              |
| chr17 | 47865762 | 47866163 | .     | .        | .        | .        | .              | .              |
| chr17 | 48450345 | 48450746 | .     | .        | .        | .        | .              | .              |
| chr17 | 48785080 | 48785481 | chr17 | 48785030 | 48785110 | GC_rich  | Low_complexity | Low_complexity |
| chr17 | 48796743 | 48797144 | .     | .        | .        | .        | .              | .              |
| chr17 | 49230678 | 49231079 | .     | .        | .        | .        | .              | .              |
| chr17 | 53045799 | 53046200 | .     | .        | .        | .        | .              | .              |
| chr17 | 56084777 | 56085178 | .     | .        | .        | .        | .              | .              |
| chr17 | 56429370 | 56429771 | .     | .        | .        | .        | .              | .              |
| chr17 | 57643332 | 57643733 | .     | .        | .        | .        | .              | .              |
| chr17 | 57784622 | 57785023 | .     | .        | .        | .        | .              | .              |
| chr17 | 58754504 | 58754905 | .     | .        | .        | .        | .              | .              |
| chr17 | 61851011 | 61851412 | .     | .        | .        | .        | .              | .              |
| chr17 | 61904501 | 61904902 | .     | .        | .        | .        | .              | .              |
| chr17 | 61920348 | 61920749 | chr17 | 61920720 | 61921017 | AluSq2   | SINE           | Alu            |
| chr17 | 62492723 | 62493124 | .     | .        | .        | .        | .              | .              |
| chr17 | 62502267 | 62502668 | .     | .        | .        | .        | .              | .              |
| chr17 | 65241038 | 65241439 | chr17 | 65241115 | 65241166 | GC_rich  | Low_complexity | Low_complexity |
| chr17 | 65241038 | 65241439 | chr17 | 65241351 | 65241414 | C-rich   | Low_complexity | Low_complexity |
| chr17 | 65713838 | 65714239 | .     | .        | .        | .        | .              | .              |
| chr17 | 66031359 | 66031760 | chr17 | 66031567 | 66031657 | C-rich   | Low_complexity | Low_complexity |
| chr17 | 66243778 | 66244179 | chr17 | 66244120 | 66244204 | (CGCGG)n | Simple_repeat  | Simple_repeat  |
| chr17 | 67410591 | 67410992 | .     | .        | .        | .        | .              | .              |

|       |          |          |       |          |          |             |                |                |
|-------|----------|----------|-------|----------|----------|-------------|----------------|----------------|
| chr17 | 70588882 | 70589283 | chr17 | 70588990 | 70589030 | (CGGGG)n    | Simple_repeat  | Simple_repeat  |
| chr17 | 73285473 | 73285874 | .     | .        | .        | .           | .              | .              |
| chr17 | 73663152 | 73663553 | .     | .        | .        | .           | .              | .              |
| chr17 | 73780567 | 73780968 | .     | .        | .        | .           | .              | .              |
| chr17 | 73841380 | 73841781 | .     | .        | .        | .           | .              | .              |
| chr17 | 73851406 | 73851807 | .     | .        | .        | .           | .              | .              |
| chr17 | 73937010 | 73937411 | .     | .        | .        | .           | .              | .              |
| chr17 | 74068495 | 74068896 | chr17 | 74068483 | 74068548 | (CCG)n      | Simple_repeat  | Simple_repeat  |
| chr17 | 74553579 | 74553980 | chr17 | 74553971 | 74554126 | MIRc        | SINE           | MIR            |
| chr17 | 74733821 | 74734222 | .     | .        | .        | .           | .              | .              |
| chr17 | 76210099 | 76210500 | chr17 | 76209828 | 76210125 | AluSq2      | SINE           | Alu            |
| chr17 | 77005709 | 77006110 | chr17 | 77005640 | 77005737 | G-rich      | Low_complexity | Low_complexity |
| chr17 | 77005709 | 77006110 | chr17 | 77005777 | 77005816 | (GGCTG)n    | Simple_repeat  | Simple_repeat  |
| chr17 | 77005709 | 77006110 | chr17 | 77005946 | 77005996 | T-rich      | Low_complexity | Low_complexity |
| chr17 | 78518443 | 78518844 | .     | .        | .        | .           | .              | .              |
| chr17 | 79670164 | 79670565 | .     | .        | .        | .           | .              | .              |
| chr17 | 79829156 | 79829557 | chr17 | 79829090 | 79829158 | C-rich      | Low_complexity | Low_complexity |
| chr17 | 79884385 | 79884786 | .     | .        | .        | .           | .              | .              |
| chr17 | 79980905 | 79981306 | .     | .        | .        | .           | .              | .              |
| chr17 | 80009586 | 80009987 | chr17 | 80009722 | 80009749 | GC_rich     | Low_complexity | Low_complexity |
| chr17 | 80009586 | 80009987 | chr17 | 80009852 | 80009889 | GC_rich     | Low_complexity | Low_complexity |
| chr17 | 80023585 | 80023986 | chr17 | 80023551 | 80023661 | GC_rich     | Low_complexity | Low_complexity |
| chr17 | 80316861 | 80317262 | .     | .        | .        | .           | .              | .              |
| chr17 | 80709665 | 80710066 | chr17 | 80709486 | 80709744 | (CCCCG)n    | Simple_repeat  | Simple_repeat  |
| chr18 | 108030   | 108431   | chr18 | 105673   | 111670   | BSR/Beta    | Satellite      | Satellite      |
| chr18 | 3447403  | 3447804  | .     | .        | .        | .           | .              | .              |
| chr18 | 9102352  | 9102753  | .     | .        | .        | .           | .              | .              |
| chr18 | 9475146  | 9475547  | .     | .        | .        | .           | .              | .              |
| chr18 | 9913452  | 9913853  | .     | .        | .        | .           | .              | .              |
| chr18 | 12948277 | 12948678 | .     | .        | .        | .           | .              | .              |
| chr18 | 13726379 | 13726780 | chr18 | 13726482 | 13726510 | GC_rich     | Low_complexity | Low_complexity |
| chr18 | 22006381 | 22006782 | .     | .        | .        | .           | .              | .              |
| chr18 | 29522868 | 29523269 | chr18 | 29523261 | 29523294 | (CGGGGG)n   | Simple_repeat  | Simple_repeat  |
| chr18 | 32870130 | 32870531 | .     | .        | .        | .           | .              | .              |
| chr18 | 32923778 | 32924179 | chr18 | 32923814 | 32923841 | GC_rich     | Low_complexity | Low_complexity |
| chr18 | 33552471 | 33552872 | .     | .        | .        | .           | .              | .              |
| chr18 | 34408607 | 34409008 | chr18 | 34408976 | 34409014 | GC_rich     | Low_complexity | Low_complexity |
| chr18 | 43684066 | 43684467 | .     | .        | .        | .           | .              | .              |
| chr18 | 46065130 | 46065531 | chr18 | 46065460 | 46065515 | C-rich      | Low_complexity | Low_complexity |
| chr18 | 46986877 | 46987278 | chr18 | 46987202 | 46987515 | AluSc       | SINE           | Alu            |
| chr18 | 47018627 | 47019028 | .     | .        | .        | .           | .              | .              |
| chr18 | 54305731 | 54306132 | chr18 | 54305837 | 54305900 | G-rich      | Low_complexity | Low_complexity |
| chr18 | 54318666 | 54319067 | .     | .        | .        | .           | .              | .              |
| chr18 | 56806786 | 56807187 | .     | .        | .        | .           | .              | .              |
| chr18 | 57026278 | 57026679 | .     | .        | .        | .           | .              | .              |
| chr18 | 60382108 | 60382509 | .     | .        | .        | .           | .              | .              |
| chr18 | 61089587 | 61089988 | .     | .        | .        | .           | .              | .              |
| chr18 | 67872969 | 67873370 | chr18 | 67873236 | 67873258 | GC_rich     | Low_complexity | Low_complexity |
| chr18 | 71815483 | 71815884 | .     | .        | .        | .           | .              | .              |
| chr18 | 77439292 | 77439693 | .     | .        | .        | .           | .              | .              |
| chr19 | 507746   | 508147   | .     | .        | .        | .           | .              | .              |
| chr19 | 531400   | 531801   | chr19 | 531702   | 531730   | GC_rich     | Low_complexity | Low_complexity |
| chr19 | 531400   | 531801   | chr19 | 531787   | 531835   | (CGG)n      | Simple_repeat  | Simple_repeat  |
| chr19 | 633428   | 633829   | chr19 | 633799   | 633962   | FRAM        | SINE           | Alu            |
| chr19 | 892918   | 893319   | chr19 | 892811   | 893001   | C-rich      | Low_complexity | Low_complexity |
| chr19 | 1021133  | 1021534  | chr19 | 1021520  | 1021627  | U6          | snRNA          | snRNA          |
| chr19 | 1068116  | 1068517  | .     | .        | .        | .           | .              | .              |
| chr19 | 1095352  | 1095753  | .     | .        | .        | .           | .              | .              |
| chr19 | 1241473  | 1241874  | chr19 | 1241387  | 1241531  | FLAM_C      | SINE           | Alu            |
| chr19 | 1241473  | 1241874  | chr19 | 1241784  | 1241945  | (CCG)n      | Simple_repeat  | Simple_repeat  |
| chr19 | 1275206  | 1275607  | chr19 | 1275561  | 1275605  | (CTG)n      | Simple_repeat  | Simple_repeat  |
| chr19 | 1383610  | 1384011  | chr19 | 1383561  | 1383636  | tRNA-Asn-AA | tRNA           | tRNA           |
| chr19 | 1407186  | 1407587  | chr19 | 1407281  | 1407331  | (CAGC)n     | Simple_repeat  | Simple_repeat  |
| chr19 | 1407186  | 1407587  | chr19 | 1407538  | 1407590  | GC_rich     | Low_complexity | Low_complexity |
| chr19 | 1490312  | 1490713  | .     | .        | .        | .           | .              | .              |
| chr19 | 1592278  | 1592679  | chr19 | 1592364  | 1592375  | GC_rich     | Low_complexity | Low_complexity |
| chr19 | 1592278  | 1592679  | chr19 | 1592375  | 1592422  | (CACG)n     | Simple_repeat  | Simple_repeat  |
| chr19 | 1592278  | 1592679  | chr19 | 1592422  | 1592465  | GC_rich     | Low_complexity | Low_complexity |
| chr19 | 1592278  | 1592679  | chr19 | 1592648  | 1592732  | (CCG)n      | Simple_repeat  | Simple_repeat  |
| chr19 | 1905104  | 1905505  | .     | .        | .        | .           | .              | .              |
| chr19 | 2236627  | 2237028  | .     | .        | .        | .           | .              | .              |
| chr19 | 2269146  | 2269547  | .     | .        | .        | .           | .              | .              |
| chr19 | 2328424  | 2328825  | .     | .        | .        | .           | .              | .              |
| chr19 | 2427451  | 2427852  | .     | .        | .        | .           | .              | .              |
| chr19 | 2456844  | 2457245  | chr19 | 2456832  | 2456857  | GC_rich     | Low_complexity | Low_complexity |
| chr19 | 2456844  | 2457245  | chr19 | 2456958  | 2456984  | (CCGCG)n    | Simple_repeat  | Simple_repeat  |
| chr19 | 2456844  | 2457245  | chr19 | 2457083  | 2457134  | MIR         | SINE           | MIR            |
| chr19 | 2456844  | 2457245  | chr19 | 2457200  | 2457228  | L1MB7       | LINE           | L1             |
| chr19 | 2456844  | 2457245  | chr19 | 2457228  | 2457521  | AluSz       | SINE           | Alu            |
| chr19 | 2785331  | 2785732  | chr19 | 2785542  | 2785605  | (CGG)n      | Simple_repeat  | Simple_repeat  |
| chr19 | 2819616  | 2820017  | .     | .        | .        | .           | .              | .              |
| chr19 | 3185644  | 3186045  | chr19 | 3185968  | 3186022  | (CCG)n      | Simple_repeat  | Simple_repeat  |
| chr19 | 3505902  | 3506303  | chr19 | 3506252  | 3506289  | GC_rich     | Low_complexity | Low_complexity |
| chr19 | 3761523  | 3761924  | .     | .        | .        | .           | .              | .              |
| chr19 | 3762441  | 3762842  | .     | .        | .        | .           | .              | .              |
| chr19 | 4065843  | 4066244  | chr19 | 4065794  | 4065942  | GC_rich     | Low_complexity | Low_complexity |
| chr19 | 4182322  | 4182723  | .     | .        | .        | .           | .              | .              |
| chr19 | 4246767  | 4247168  | .     | .        | .        | .           | .              | .              |
| chr19 | 4304355  | 4304756  | chr19 | 4304377  | 4304480  | MIRc        | SINE           | MIR            |
| chr19 | 4304355  | 4304756  | chr19 | 4304621  | 4304656  | GC_rich     | Low_complexity | Low_complexity |
| chr19 | 4304355  | 4304756  | chr19 | 4304699  | 4304726  | GC_rich     | Low_complexity | Low_complexity |
| chr19 | 4723640  | 4724041  | chr19 | 4723569  | 4723720  | (CGGGG)n    | Simple_repeat  | Simple_repeat  |
| chr19 | 4791412  | 4791813  | .     | .        | .        | .           | .              | .              |
| chr19 | 5680458  | 5680859  | .     | .        | .        | .           | .              | .              |
| chr19 | 5690070  | 5690471  | chr19 | 5689983  | 5690079  | MIR         | SINE           | MIR            |
| chr19 | 5790464  | 5790865  | .     | .        | .        | .           | .              | .              |
| chr19 | 5977877  | 5978278  | .     | .        | .        | .           | .              | .              |
| chr19 | 6361339  | 6361740  | chr19 | 6361050  | 6361347  | AluSg4      | SINE           | Alu            |
| chr19 | 6393033  | 6393434  | .     | .        | .        | .           | .              | .              |
| chr19 | 6424674  | 6425075  | chr19 | 6424661  | 6424688  | GC_rich     | Low_complexity | Low_complexity |
| chr19 | 6424674  | 6425075  | chr19 | 6424755  | 6424776  | (CGG)n      | Simple_repeat  | Simple_repeat  |
| chr19 | 6737754  | 6738155  | .     | .        | .        | .           | .              | .              |
| chr19 | 7580707  | 7581108  | chr19 | 7580510  | 7580790  | (CAGAGA)n   | Simple_repeat  | Simple_repeat  |
| chr19 | 7580707  | 7581108  | chr19 | 7580925  | 7580946  | GC_rich     | Low_complexity | Low_complexity |
| chr19 | 7580707  | 7581108  | chr19 | 7581025  | 7581204  | G-rich      | Low_complexity | Low_complexity |

|       |          |          |       |          |          |          |                |   |                |
|-------|----------|----------|-------|----------|----------|----------|----------------|---|----------------|
| chr19 | 7600352  | 7600753  | .     | .        | .        | .        | .              | . | .              |
| chr19 | 8386083  | 8386484  | .     | .        | .        | .        | .              | . | .              |
| chr19 | 9250807  | 9251208  | chr19 | 9250588  | 9250889  | L1MC4    | LINE           |   | L1             |
| chr19 | 9250807  | 9251208  | chr19 | 9250982  | 9251125  | LTR33B   | LTR            |   | ERV1           |
| chr19 | 9938364  | 9938765  | .     | .        | .        | .        | .              | . | .              |
| chr19 | 10197113 | 10197514 | .     | .        | .        | .        | .              | . | .              |
| chr19 | 10305580 | 10305981 | chr19 | 10305934 | 10306060 | MIRb     | SINE           |   | MIR            |
| chr19 | 10363047 | 10363448 | .     | .        | .        | .        | .              | . | .              |
| chr19 | 10399781 | 10400182 | .     | .        | .        | .        | .              | . | .              |
| chr19 | 10443915 | 10444316 | .     | .        | .        | .        | .              | . | .              |
| chr19 | 10811968 | 10812369 | .     | .        | .        | .        | .              | . | .              |
| chr19 | 10827901 | 10828302 | .     | .        | .        | .        | .              | . | .              |
| chr19 | 10947045 | 10947446 | chr19 | 10947427 | 10947544 | MIR      | SINE           |   | MIR            |
| chr19 | 11639755 | 11640156 | .     | .        | .        | .        | .              | . | .              |
| chr19 | 12780184 | 12780585 | .     | .        | .        | .        | .              | . | .              |
| chr19 | 12834659 | 12835060 | .     | .        | .        | .        | .              | . | .              |
| chr19 | 12845280 | 12845681 | chr19 | 12845328 | 12845418 | C-rich   | Low_complexity |   | Low_complexity |
| chr19 | 12845280 | 12845681 | chr19 | 12845669 | 12845980 | AluSp    | SINE           |   | Alu            |
| chr19 | 12917104 | 12917505 | .     | .        | .        | .        | .              | . | .              |
| chr19 | 12992050 | 12992451 | .     | .        | .        | .        | .              | . | .              |
| chr19 | 13056493 | 13056894 | chr19 | 13056664 | 13056685 | GC_rich  | Low_complexity |   | Low_complexity |
| chr19 | 13056493 | 13056894 | chr19 | 13056836 | 13056864 | GC_rich  | Low_complexity |   | Low_complexity |
| chr19 | 13105518 | 13105919 | chr19 | 13105289 | 13105558 | AluJb    | SINE           |   | Alu            |
| chr19 | 13105518 | 13105919 | chr19 | 13105623 | 13105801 | (TG)n    | Simple_repeat  |   | Simple_repeat  |
| chr19 | 13885012 | 13885413 | .     | .        | .        | .        | .              | . | .              |
| chr19 | 14016794 | 14017195 | .     | .        | .        | .        | .              | . | .              |
| chr19 | 14117321 | 14117722 | .     | .        | .        | .        | .              | . | .              |
| chr19 | 14141840 | 14142241 | .     | .        | .        | .        | .              | . | .              |
| chr19 | 14229031 | 14229432 | chr19 | 14229098 | 14229127 | GC_rich  | Low_complexity |   | Low_complexity |
| chr19 | 14229031 | 14229432 | chr19 | 14229348 | 14229443 | MIR      | SINE           |   | MIR            |
| chr19 | 14607978 | 14608379 | chr19 | 14607882 | 14608004 | L2b      | LINE           |   | L2             |
| chr19 | 14682674 | 14683075 | .     | .        | .        | .        | .              | . | .              |
| chr19 | 14800613 | 14801014 | chr19 | 14800905 | 14800936 | (CGCGG)n | Simple_repeat  |   | Simple_repeat  |
| chr19 | 15217791 | 15218192 | chr19 | 15218137 | 15218197 | (CGGGG)n | Simple_repeat  |   | Simple_repeat  |
| chr19 | 15490484 | 15490885 | .     | .        | .        | .        | .              | . | .              |
| chr19 | 16606887 | 16607288 | .     | .        | .        | .        | .              | . | .              |
| chr19 | 16738863 | 16739264 | chr19 | 16738860 | 16738944 | GC_rich  | Low_complexity |   | Low_complexity |
| chr19 | 17378049 | 17378450 | .     | .        | .        | .        | .              | . | .              |
| chr19 | 17416440 | 17416841 | .     | .        | .        | .        | .              | . | .              |
| chr19 | 17419951 | 17420352 | chr19 | 17419779 | 17420043 | AluSq2   | SINE           |   | Alu            |
| chr19 | 17516003 | 17516404 | .     | .        | .        | .        | .              | . | .              |
| chr19 | 17530561 | 17530962 | .     | .        | .        | .        | .              | . | .              |
| chr19 | 17970318 | 17970719 | chr19 | 17970423 | 17970444 | GC_rich  | Low_complexity |   | Low_complexity |
| chr19 | 18043354 | 18043755 | .     | .        | .        | .        | .              | . | .              |
| chr19 | 18304141 | 18304542 | .     | .        | .        | .        | .              | . | .              |
| chr19 | 18334801 | 18335202 | chr19 | 18334842 | 18334955 | L2c      | LINE           |   | L2             |
| chr19 | 18385705 | 18386106 | chr19 | 18385665 | 18385740 | L2c      | LINE           |   | L2             |
| chr19 | 18385705 | 18386106 | chr19 | 18386077 | 18386373 | AluSz    | SINE           |   | Alu            |
| chr19 | 18392402 | 18392803 | chr19 | 18392303 | 18392413 | GC_rich  | Low_complexity |   | Low_complexity |
| chr19 | 18392402 | 18392803 | chr19 | 18392633 | 18392674 | GC_rich  | Low_complexity |   | Low_complexity |
| chr19 | 18392402 | 18392803 | chr19 | 18392738 | 18392806 | GC_rich  | Low_complexity |   | Low_complexity |
| chr19 | 18633274 | 18633675 | chr19 | 18633631 | 18633798 | AluJb    | SINE           |   | Alu            |
| chr19 | 19030126 | 19030527 | .     | .        | .        | .        | .              | . | .              |
| chr19 | 19249182 | 19249583 | .     | .        | .        | .        | .              | . | .              |
| chr19 | 19431270 | 19431671 | chr19 | 19431670 | 19431733 | (CGG)n   | Simple_repeat  |   | Simple_repeat  |
| chr19 | 19495916 | 19496317 | .     | .        | .        | .        | .              | . | .              |
| chr19 | 19887120 | 19887521 | .     | .        | .        | .        | .              | . | .              |
| chr19 | 28284699 | 28285100 | .     | .        | .        | .        | .              | . | .              |
| chr19 | 34663100 | 34663501 | chr19 | 34663338 | 34663379 | (CCG)n   | Simple_repeat  |   | Simple_repeat  |
| chr19 | 35168268 | 35168669 | .     | .        | .        | .        | .              | . | .              |
| chr19 | 35224831 | 35225232 | .     | .        | .        | .        | .              | . | .              |
| chr19 | 35263999 | 35264400 | .     | .        | .        | .        | .              | . | .              |
| chr19 | 35417658 | 35418059 | .     | .        | .        | .        | .              | . | .              |
| chr19 | 36036296 | 36036697 | chr19 | 36036609 | 36036638 | GC_rich  | Low_complexity |   | Low_complexity |
| chr19 | 36208273 | 36208674 | .     | .        | .        | .        | .              | . | .              |
| chr19 | 36236195 | 36236596 | .     | .        | .        | .        | .              | . | .              |
| chr19 | 36239050 | 36239451 | chr19 | 36239007 | 36239095 | MIRb     | SINE           |   | MIR            |
| chr19 | 36249013 | 36249414 | .     | .        | .        | .        | .              | . | .              |
| chr19 | 36485902 | 36486303 | .     | .        | .        | .        | .              | . | .              |
| chr19 | 36630646 | 36631047 | .     | .        | .        | .        | .              | . | .              |
| chr19 | 36705412 | 36705813 | .     | .        | .        | .        | .              | . | .              |
| chr19 | 36869900 | 36870301 | chr19 | 36870008 | 36870036 | GC_rich  | Low_complexity |   | Low_complexity |
| chr19 | 36869900 | 36870301 | chr19 | 36870290 | 36870592 | AluJo    | SINE           |   | Alu            |
| chr19 | 36909380 | 36909781 | .     | .        | .        | .        | .              | . | .              |
| chr19 | 36980320 | 36980721 | .     | .        | .        | .        | .              | . | .              |
| chr19 | 37019406 | 37019807 | .     | .        | .        | .        | .              | . | .              |
| chr19 | 37064035 | 37064436 | .     | .        | .        | .        | .              | . | .              |
| chr19 | 37157578 | 37157979 | .     | .        | .        | .        | .              | . | .              |
| chr19 | 37178199 | 37178600 | .     | .        | .        | .        | .              | . | .              |
| chr19 | 37341471 | 37341872 | chr19 | 37341314 | 37341565 | MER31B   | LTR            |   | ERV1           |
| chr19 | 37569071 | 37569472 | .     | .        | .        | .        | .              | . | .              |
| chr19 | 37825286 | 37825687 | .     | .        | .        | .        | .              | . | .              |
| chr19 | 37861741 | 37862142 | .     | .        | .        | .        | .              | . | .              |
| chr19 | 38085508 | 38085909 | .     | .        | .        | .        | .              | . | .              |
| chr19 | 38210441 | 38210842 | .     | .        | .        | .        | .              | . | .              |
| chr19 | 38270079 | 38270480 | .     | .        | .        | .        | .              | . | .              |
| chr19 | 38397580 | 38397981 | .     | .        | .        | .        | .              | . | .              |
| chr19 | 38714737 | 38715138 | chr19 | 38714906 | 38714935 | GC_rich  | Low_complexity |   | Low_complexity |
| chr19 | 38714737 | 38715138 | chr19 | 38715067 | 38715208 | (CA)n    | Simple_repeat  |   | Simple_repeat  |
| chr19 | 38720285 | 38720686 | chr19 | 38720243 | 38720309 | GC_rich  | Low_complexity |   | Low_complexity |
| chr19 | 38720285 | 38720686 | chr19 | 38720365 | 38720388 | GC_rich  | Low_complexity |   | Low_complexity |
| chr19 | 38720285 | 38720686 | chr19 | 38720435 | 38720465 | GC_rich  | Low_complexity |   | Low_complexity |
| chr19 | 38754435 | 38754836 | chr19 | 38754318 | 38754540 | L2b      | LINE           |   | L2             |
| chr19 | 38754435 | 38754836 | chr19 | 38754550 | 38754638 | L2b      | LINE           |   | L2             |
| chr19 | 38754435 | 38754836 | chr19 | 38754743 | 38754816 | L2b      | LINE           |   | L2             |
| chr19 | 39390220 | 39390621 | .     | .        | .        | .        | .              | . | .              |
| chr19 | 39616467 | 39616868 | .     | .        | .        | .        | .              | . | .              |
| chr19 | 39881550 | 39881951 | .     | .        | .        | .        | .              | . | .              |
| chr19 | 39936021 | 39936422 | .     | .        | .        | .        | .              | . | .              |
| chr19 | 40476821 | 40477222 | .     | .        | .        | .        | .              | . | .              |
| chr19 | 40502753 | 40503154 | .     | .        | .        | .        | .              | . | .              |
| chr19 | 40561962 | 40562363 | .     | .        | .        | .        | .              | . | .              |
| chr19 | 40596673 | 40597074 | .     | .        | .        | .        | .              | . | .              |
| chr19 | 40697095 | 40697496 | chr19 | 40697115 | 40697136 | GC_rich  | Low_complexity |   | Low_complexity |
| chr19 | 40697095 | 40697496 | chr19 | 40697418 | 40697519 | GC_rich  | Low_complexity |   | Low_complexity |

|       |          |          |       |          |          |          |                |                |
|-------|----------|----------|-------|----------|----------|----------|----------------|----------------|
| chr19 | 40791381 | 40791782 | chr19 | 40791705 | 40791850 | MIR      | SINE           | MIR            |
| chr19 | 40948988 | 40949389 | .     | .        | .        | .        | .              | .              |
| chr19 | 41084361 | 41084762 | .     | .        | .        | .        | .              | .              |
| chr19 | 41256883 | 41257284 | .     | .        | .        | .        | .              | .              |
| chr19 | 42007357 | 42007758 | chr19 | 42007381 | 42007780 | L1PA12   | LINE           | L1             |
| chr19 | 42388186 | 42388587 | chr19 | 42388237 | 42388261 | GC_rich  | Low_complexity | Low_complexity |
| chr19 | 42463376 | 42463777 | chr19 | 42463495 | 42463524 | GC_rich  | Low_complexity | Low_complexity |
| chr19 | 42746729 | 42747130 | .     | .        | .        | .        | .              | .              |
| chr19 | 44123415 | 44123816 | .     | .        | .        | .        | .              | .              |
| chr19 | 44145487 | 44145888 | chr19 | 44145837 | 44145945 | MIR3     | SINE           | MIR            |
| chr19 | 44331227 | 44331628 | .     | .        | .        | .        | .              | .              |
| chr19 | 44439271 | 44439672 | .     | .        | .        | .        | .              | .              |
| chr19 | 44455113 | 44455514 | .     | .        | .        | .        | .              | .              |
| chr19 | 44488070 | 44488471 | .     | .        | .        | .        | .              | .              |
| chr19 | 44506832 | 44507233 | .     | .        | .        | .        | .              | .              |
| chr19 | 44529230 | 44529631 | .     | .        | .        | .        | .              | .              |
| chr19 | 44555846 | 44556247 | .     | .        | .        | .        | .              | .              |
| chr19 | 44576060 | 44576461 | .     | .        | .        | .        | .              | .              |
| chr19 | 44598250 | 44598651 | .     | .        | .        | .        | .              | .              |
| chr19 | 44617256 | 44617657 | .     | .        | .        | .        | .              | .              |
| chr19 | 44645476 | 44645877 | .     | .        | .        | .        | .              | .              |
| chr19 | 44668923 | 44669324 | .     | .        | .        | .        | .              | .              |
| chr19 | 44716449 | 44716850 | chr19 | 44716519 | 44716544 | (T)n     | Simple_repeat  | Simple_repeat  |
| chr19 | 44763815 | 44764216 | chr19 | 44763641 | 44763950 | Alu5g    | SINE           | Alu            |
| chr19 | 44809017 | 44809418 | .     | .        | .        | .        | .              | .              |
| chr19 | 44860672 | 44861073 | .     | .        | .        | .        | .              | .              |
| chr19 | 44905571 | 44905972 | .     | .        | .        | .        | .              | .              |
| chr19 | 44952507 | 44952908 | .     | .        | .        | .        | .              | .              |
| chr19 | 45004427 | 45004828 | .     | .        | .        | .        | .              | .              |
| chr19 | 45393600 | 45394001 | .     | .        | .        | .        | .              | .              |
| chr19 | 45908594 | 45908995 | chr19 | 45908657 | 45908701 | MIR3     | SINE           | MIR            |
| chr19 | 46010480 | 46010881 | .     | .        | .        | .        | .              | .              |
| chr19 | 46234043 | 46234444 | .     | .        | .        | .        | .              | .              |
| chr19 | 46366379 | 46366780 | chr19 | 46366371 | 46366391 | (CCG)n   | Simple_repeat  | Simple_repeat  |
| chr19 | 46389927 | 46390328 | .     | .        | .        | .        | .              | .              |
| chr19 | 47287884 | 47288285 | .     | .        | .        | .        | .              | .              |
| chr19 | 47354079 | 47354480 | chr19 | 47354474 | 47354595 | AluJr4   | SINE           | Alu            |
| chr19 | 47551860 | 47552261 | chr19 | 47552226 | 47552354 | T-rich   | Low_complexity | Low_complexity |
| chr19 | 47734889 | 47735290 | .     | .        | .        | .        | .              | .              |
| chr19 | 48111235 | 48111636 | chr19 | 48111147 | 48111244 | L2a      | LINE           | L2             |
| chr19 | 48111235 | 48111636 | chr19 | 48111237 | 48111345 | L2b      | LINE           | L2             |
| chr19 | 48673604 | 48674005 | chr19 | 48673959 | 48674123 | (CGGG)n  | Simple_repeat  | Simple_repeat  |
| chr19 | 48866270 | 48866671 | chr19 | 48866264 | 48866383 | MIRb     | SINE           | MIR            |
| chr19 | 48948861 | 48949262 | .     | .        | .        | .        | .              | .              |
| chr19 | 48965603 | 48966004 | .     | .        | .        | .        | .              | .              |
| chr19 | 49122430 | 49122831 | .     | .        | .        | .        | .              | .              |
| chr19 | 49148009 | 49148410 | chr19 | 49148029 | 49148151 | AluSq10  | SINE           | Alu            |
| chr19 | 49248459 | 49248860 | .     | .        | .        | .        | .              | .              |
| chr19 | 49403092 | 49403493 | chr19 | 49403009 | 49403194 | AluJr    | SINE           | Alu            |
| chr19 | 49469019 | 49469420 | .     | .        | .        | .        | .              | .              |
| chr19 | 49588724 | 49589125 | .     | .        | .        | .        | .              | .              |
| chr19 | 49618176 | 49618577 | .     | .        | .        | .        | .              | .              |
| chr19 | 49954473 | 49954874 | chr19 | 49954278 | 49954585 | AluY     | SINE           | Alu            |
| chr19 | 49956539 | 49956940 | .     | .        | .        | .        | .              | .              |
| chr19 | 50000478 | 50000879 | .     | .        | .        | .        | .              | .              |
| chr19 | 50030835 | 50031236 | chr19 | 50030541 | 50030854 | AluSp    | SINE           | Alu            |
| chr19 | 50030835 | 50031236 | chr19 | 50030856 | 50030908 | (TTTTG)n | Simple_repeat  | Simple_repeat  |
| chr19 | 50083724 | 50084125 | .     | .        | .        | .        | .              | .              |
| chr19 | 50145068 | 50145469 | chr19 | 50145441 | 50145471 | (CCCCG)n | Simple_repeat  | Simple_repeat  |
| chr19 | 50168970 | 50169371 | .     | .        | .        | .        | .              | .              |
| chr19 | 50179999 | 50180400 | .     | .        | .        | .        | .              | .              |
| chr19 | 50314627 | 50315028 | chr19 | 50315005 | 50315082 | MSR1     | Satellite      | Satellite      |
| chr19 | 50321274 | 50321675 | .     | .        | .        | .        | .              | .              |
| chr19 | 50353757 | 50354158 | chr19 | 50353911 | 50353939 | GC_rich  | Low_complexity | Low_complexity |
| chr19 | 50432476 | 50432877 | .     | .        | .        | .        | .              | .              |
| chr19 | 50529048 | 50529449 | .     | .        | .        | .        | .              | .              |
| chr19 | 50553963 | 50554364 | .     | .        | .        | .        | .              | .              |
| chr19 | 50879413 | 50879814 | .     | .        | .        | .        | .              | .              |
| chr19 | 50887390 | 50887791 | .     | .        | .        | .        | .              | .              |
| chr19 | 50979554 | 50979955 | .     | .        | .        | .        | .              | .              |
| chr19 | 51014348 | 51014749 | .     | .        | .        | .        | .              | .              |
| chr19 | 51142386 | 51142787 | .     | .        | .        | .        | .              | .              |
| chr19 | 51152787 | 51153188 | .     | .        | .        | .        | .              | .              |
| chr19 | 51275616 | 51276017 | chr19 | 51275421 | 51275751 | AluJb    | SINE           | Alu            |
| chr19 | 51275616 | 51276017 | chr19 | 51275751 | 51275987 | MLT1J    | LTR            | ERVL-MaLR      |
| chr19 | 51275616 | 51276017 | chr19 | 51275987 | 51276043 | MLT1H    | LTR            | ERVL-MaLR      |
| chr19 | 51611536 | 51611937 | .     | .        | .        | .        | .              | .              |
| chr19 | 52074198 | 52074599 | .     | .        | .        | .        | .              | .              |
| chr19 | 52097573 | 52097974 | .     | .        | .        | .        | .              | .              |
| chr19 | 52193866 | 52194267 | chr19 | 52193928 | 52194065 | MIR3     | SINE           | MIR            |
| chr19 | 52430169 | 52430570 | .     | .        | .        | .        | .              | .              |
| chr19 | 52489908 | 52490309 | .     | .        | .        | .        | .              | .              |
| chr19 | 54023953 | 54024354 | .     | .        | .        | .        | .              | .              |
| chr19 | 54040721 | 54041122 | .     | .        | .        | .        | .              | .              |
| chr19 | 54057086 | 54057487 | .     | .        | .        | .        | .              | .              |
| chr19 | 54605905 | 54606306 | .     | .        | .        | .        | .              | .              |
| chr19 | 54618548 | 54618949 | .     | .        | .        | .        | .              | .              |
| chr19 | 54694205 | 54694606 | .     | .        | .        | .        | .              | .              |
| chr19 | 55628973 | 55629374 | chr19 | 55628968 | 55629001 | GC_rich  | Low_complexity | Low_complexity |
| chr19 | 55677262 | 55677663 | .     | .        | .        | .        | .              | .              |
| chr19 | 55690348 | 55690749 | .     | .        | .        | .        | .              | .              |
| chr19 | 55770127 | 55770528 | .     | .        | .        | .        | .              | .              |
| chr19 | 55791334 | 55791735 | .     | .        | .        | .        | .              | .              |
| chr19 | 55987670 | 55988071 | .     | .        | .        | .        | .              | .              |
| chr19 | 56110791 | 56111192 | chr19 | 56110899 | 56111010 | C-rich   | Low_complexity | Low_complexity |
| chr19 | 56632695 | 56633096 | .     | .        | .        | .        | .              | .              |
| chr19 | 56652167 | 56652568 | .     | .        | .        | .        | .              | .              |
| chr19 | 57106414 | 57106815 | chr19 | 57106402 | 57106485 | C-rich   | Low_complexity | Low_complexity |
| chr19 | 57106414 | 57106815 | chr19 | 57106532 | 57106566 | (CTCGG)n | Simple_repeat  | Simple_repeat  |
| chr19 | 57751684 | 57752085 | .     | .        | .        | .        | .              | .              |
| chr19 | 57791520 | 57791921 | .     | .        | .        | .        | .              | .              |
| chr19 | 57862333 | 57862734 | .     | .        | .        | .        | .              | .              |
| chr19 | 57874504 | 57874905 | chr19 | 57874731 | 57874760 | (CGTG)n  | Simple_repeat  | Simple_repeat  |
| chr19 | 57900945 | 57901346 | .     | .        | .        | .        | .              | .              |
| chr19 | 57922239 | 57922640 | .     | .        | .        | .        | .              | .              |

|       |          |          |       |          |                       |                |                |
|-------|----------|----------|-------|----------|-----------------------|----------------|----------------|
| chr19 | 57946396 | 57946797 | .     | .        | .                     | .              | .              |
| chr19 | 57988835 | 57989236 | .     | .        | .                     | .              | .              |
| chr19 | 57998839 | 57999240 | chr19 | 57998894 | 57998968 (CACCAT)n    | Simple_repeat  | Simple_repeat  |
| chr19 | 58090157 | 58090558 | chr19 | 58090540 | 58091091 MER4D1       | LTR            | ERV1           |
| chr19 | 58110975 | 58111376 | .     | .        | .                     | .              | .              |
| chr19 | 58125324 | 58125725 | .     | .        | .                     | .              | .              |
| chr19 | 58144253 | 58144654 | chr19 | 58144246 | 58144319 Tigger2b_Pri | DNA            | TcMar-Tigger   |
| chr19 | 58257891 | 58258292 | .     | .        | .                     | .              | .              |
| chr19 | 58280724 | 58281125 | .     | .        | .                     | .              | .              |
| chr19 | 58326178 | 58326579 | chr19 | 58326499 | 58326647 FRAM         | SINE           | Alu            |
| chr19 | 58360907 | 58361308 | chr19 | 58361003 | 58361048 L2c          | LINE           | L2             |
| chr19 | 58427851 | 58428252 | chr19 | 58428178 | 58428500 AluY         | SINE           | Alu            |
| chr19 | 58694510 | 58694911 | .     | .        | .                     | .              | .              |
| chr19 | 58740017 | 58740418 | .     | .        | .                     | .              | .              |
| chr19 | 58790109 | 58790510 | .     | .        | .                     | .              | .              |
| chr19 | 58838125 | 58838526 | .     | .        | .                     | .              | .              |
| chr19 | 58873632 | 58874033 | chr19 | 58873697 | 58873771 (TGAA)n      | Simple_repeat  | Simple_repeat  |
| chr19 | 58892240 | 58892641 | .     | .        | .                     | .              | .              |
| chr19 | 58898391 | 58898792 | .     | .        | .                     | .              | .              |
| chr19 | 58919769 | 58920170 | .     | .        | .                     | .              | .              |
| chr19 | 58962720 | 58963121 | .     | .        | .                     | .              | .              |
| chr19 | 58978086 | 58978487 | .     | .        | .                     | .              | .              |
| chr19 | 58987205 | 58987606 | .     | .        | .                     | .              | .              |
| chr19 | 59031082 | 59031483 | .     | .        | .                     | .              | .              |
| chr19 | 59066162 | 59066563 | .     | .        | .                     | .              | .              |
| chr19 | 59084310 | 59084711 | .     | .        | .                     | .              | .              |
| chr19 | 59086562 | 59086963 | chr19 | 59086262 | 59086572 AluYa5       | SINE           | Alu            |
| chr2  | 3622602  | 3623003  | .     | .        | .                     | .              | .              |
| chr2  | 9695790  | 9696191  | .     | .        | .                     | .              | .              |
| chr2  | 11484538 | 11484939 | chr2  | 11484590 | 11484626 GC_rich      | Low_complexity | Low_complexity |
| chr2  | 11484538 | 11484939 | chr2  | 11484660 | 11484827 (CCG)n       | Simple_repeat  | Simple_repeat  |
| chr2  | 11484538 | 11484939 | chr2  | 11484837 | 11484860 (CCCCG)n     | Simple_repeat  | Simple_repeat  |
| chr2  | 11484538 | 11484939 | chr2  | 11484868 | 11484956 CT-rich      | Low_complexity | Low_complexity |
| chr2  | 18741773 | 18742174 | .     | .        | .                     | .              | .              |
| chr2  | 21022658 | 21023059 | .     | .        | .                     | .              | .              |
| chr2  | 24270227 | 24270628 | .     | .        | .                     | .              | .              |
| chr2  | 24299030 | 24299431 | .     | .        | .                     | .              | .              |
| chr2  | 25016063 | 25016464 | .     | .        | .                     | .              | .              |
| chr2  | 26100203 | 26100604 | .     | .        | .                     | .              | .              |
| chr2  | 26205448 | 26205849 | chr2  | 26205443 | 26205518 G-rich       | Low_complexity | Low_complexity |
| chr2  | 26568512 | 26568913 | .     | .        | .                     | .              | .              |
| chr2  | 27070577 | 27070978 | chr2  | 27070814 | 27070836 GC_rich      | Low_complexity | Low_complexity |
| chr2  | 27255556 | 27255957 | chr2  | 27255768 | 27255797 GC_rich      | Low_complexity | Low_complexity |
| chr2  | 27255556 | 27255957 | chr2  | 27255948 | 27255969 GC_rich      | Low_complexity | Low_complexity |
| chr2  | 27579664 | 27580065 | .     | .        | .                     | .              | .              |
| chr2  | 27593167 | 27593568 | .     | .        | .                     | .              | .              |
| chr2  | 27603475 | 27603876 | chr2  | 27603483 | 27603581 GC_rich      | Low_complexity | Low_complexity |
| chr2  | 27886448 | 27886849 | .     | .        | .                     | .              | .              |
| chr2  | 27994571 | 27994972 | chr2  | 27994965 | 27995109 MIR3         | SINE           | MIR            |
| chr2  | 28113050 | 28113451 | .     | .        | .                     | .              | .              |
| chr2  | 32288290 | 32288691 | .     | .        | .                     | .              | .              |
| chr2  | 32390610 | 32391011 | chr2  | 32390572 | 32390673 MIRb         | SINE           | MIR            |
| chr2  | 32852952 | 32853353 | .     | .        | .                     | .              | .              |
| chr2  | 37193585 | 37193986 | chr2  | 37193821 | 37193859 GC_rich      | Low_complexity | Low_complexity |
| chr2  | 37193585 | 37193986 | chr2  | 37193891 | 37193919 GC_rich      | Low_complexity | Low_complexity |
| chr2  | 38152467 | 38152868 | .     | .        | .                     | .              | .              |
| chr2  | 38892830 | 38893231 | .     | .        | .                     | .              | .              |
| chr2  | 39005151 | 39005552 | .     | .        | .                     | .              | .              |
| chr2  | 39102849 | 39103250 | .     | .        | .                     | .              | .              |
| chr2  | 39187902 | 39188303 | .     | .        | .                     | .              | .              |
| chr2  | 43823002 | 43823403 | .     | .        | .                     | .              | .              |
| chr2  | 44000957 | 44001358 | chr2  | 44000953 | 44000974 AT_rich      | Low_complexity | Low_complexity |
| chr2  | 44223234 | 44223635 | .     | .        | .                     | .              | .              |
| chr2  | 44394712 | 44395113 | chr2  | 44394516 | 44394760 L2a          | LINE           | L2             |
| chr2  | 46925671 | 46926072 | .     | .        | .                     | .              | .              |
| chr2  | 53994565 | 53994966 | .     | .        | .                     | .              | .              |
| chr2  | 54013850 | 54014251 | .     | .        | .                     | .              | .              |
| chr2  | 54557852 | 54558253 | .     | .        | .                     | .              | .              |
| chr2  | 54784627 | 54785028 | .     | .        | .                     | .              | .              |
| chr2  | 54950396 | 54950797 | .     | .        | .                     | .              | .              |
| chr2  | 55459285 | 55459686 | .     | .        | .                     | .              | .              |
| chr2  | 55496205 | 55496606 | chr2  | 55496584 | 55496725 T-rich       | Low_complexity | Low_complexity |
| chr2  | 55845818 | 55846219 | chr2  | 55845772 | 55845956 AluSc8       | SINE           | Alu            |
| chr2  | 55920752 | 55921153 | .     | .        | .                     | .              | .              |
| chr2  | 58274232 | 58274633 | .     | .        | .                     | .              | .              |
| chr2  | 60983241 | 60983642 | .     | .        | .                     | .              | .              |
| chr2  | 63815801 | 63816202 | .     | .        | .                     | .              | .              |
| chr2  | 64246338 | 64246739 | chr2  | 64246359 | 64246472 (CCG)n       | Simple_repeat  | Simple_repeat  |
| chr2  | 64246338 | 64246739 | chr2  | 64246563 | 64246623 GC_rich      | Low_complexity | Low_complexity |
| chr2  | 64371497 | 64371898 | .     | .        | .                     | .              | .              |
| chr2  | 64751252 | 64751653 | .     | .        | .                     | .              | .              |
| chr2  | 65357172 | 65357573 | .     | .        | .                     | .              | .              |
| chr2  | 68384532 | 68384933 | .     | .        | .                     | .              | .              |
| chr2  | 68694334 | 68694735 | .     | .        | .                     | .              | .              |
| chr2  | 69240317 | 69240718 | .     | .        | .                     | .              | .              |
| chr2  | 69870914 | 69871315 | .     | .        | .                     | .              | .              |
| chr2  | 70314333 | 70314734 | chr2  | 70314644 | 70314716 C-rich       | Low_complexity | Low_complexity |
| chr2  | 70417691 | 70418092 | .     | .        | .                     | .              | .              |
| chr2  | 71295547 | 71295948 | .     | .        | .                     | .              | .              |
| chr2  | 73053021 | 73053422 | .     | .        | .                     | .              | .              |
| chr2  | 73298735 | 73299136 | .     | .        | .                     | .              | .              |
| chr2  | 73441157 | 73441558 | .     | .        | .                     | .              | .              |
| chr2  | 73461236 | 73461637 | .     | .        | .                     | .              | .              |
| chr2  | 73964365 | 73964766 | chr2  | 73964703 | 73964823 MIR3         | SINE           | MIR            |
| chr2  | 74681920 | 74682321 | chr2  | 74681806 | 74681963 L2c          | LINE           | L2             |
| chr2  | 74699623 | 74700024 | .     | .        | .                     | .              | .              |
| chr2  | 74710050 | 74710451 | .     | .        | .                     | .              | .              |
| chr2  | 74756759 | 74757160 | .     | .        | .                     | .              | .              |
| chr2  | 75873688 | 75874089 | chr2  | 75873485 | 75873781 L2b          | LINE           | L2             |
| chr2  | 84686435 | 84686836 | .     | .        | .                     | .              | .              |
| chr2  | 85581634 | 85582035 | .     | .        | .                     | .              | .              |
| chr2  | 85829740 | 85830141 | .     | .        | .                     | .              | .              |
| chr2  | 86332531 | 86332932 | .     | .        | .                     | .              | .              |
| chr2  | 86421885 | 86422286 | .     | .        | .                     | .              | .              |
| chr2  | 88990878 | 88991279 | chr2  | 88991260 | 88991302 GC_rich      | Low_complexity | Low_complexity |







|       |          |          |       |          |          |           |                |                |
|-------|----------|----------|-------|----------|----------|-----------|----------------|----------------|
| chr21 | 43299338 | 43299739 | chr21 | 43299497 | 43299608 | G-rich    | Low_complexity | Low_complexity |
| chr21 | 45079146 | 45079547 | chr21 | 45078896 | 45079205 | AluJr     | SINE           | Alu            |
| chr21 | 45079146 | 45079547 | chr21 | 45079415 | 45079438 | GC_rich   | Low_complexity | Low_complexity |
| chr21 | 46221552 | 46221953 | .     | .        | .        | .         | .              | .              |
| chr21 | 46359691 | 46360092 | chr21 | 46360034 | 46360098 | GC_rich   | Low_complexity | Low_complexity |
| chr21 | 46962217 | 46962618 | chr21 | 46962362 | 46962399 | GC_rich   | Low_complexity | Low_complexity |
| chr21 | 47878412 | 47878813 | chr21 | 47878459 | 47878494 | GC_rich   | Low_complexity | Low_complexity |
| chr22 | 17640048 | 17640449 | chr22 | 17640042 | 17640089 | GC_rich   | Low_complexity | Low_complexity |
| chr22 | 18560462 | 18560863 | .     | .        | .        | .         | .              | .              |
| chr22 | 19132083 | 19132484 | .     | .        | .        | .         | .              | .              |
| chr22 | 19466887 | 19467288 | .     | .        | .        | .         | .              | .              |
| chr22 | 19842403 | 19842804 | .     | .        | .        | .         | .              | .              |
| chr22 | 20067264 | 20067665 | .     | .        | .        | .         | .              | .              |
| chr22 | 20104703 | 20105104 | .     | .        | .        | .         | .              | .              |
| chr22 | 20748170 | 20748571 | .     | .        | .        | .         | .              | .              |
| chr22 | 20861629 | 20862030 | .     | .        | .        | .         | .              | .              |
| chr22 | 21271471 | 21271872 | chr22 | 21271654 | 21271685 | GC_rich   | Low_complexity | Low_complexity |
| chr22 | 21336262 | 21336663 | .     | .        | .        | .         | .              | .              |
| chr22 | 21921786 | 21922187 | chr22 | 21921814 | 21921918 | L2b       | LINE           | L2             |
| chr22 | 21921786 | 21922187 | chr22 | 21921757 | 21921804 | L2a       | LINE           | L2             |
| chr22 | 22020065 | 22020466 | .     | .        | .        | .         | .              | .              |
| chr22 | 22337008 | 22337409 | .     | .        | .        | .         | .              | .              |
| chr22 | 24059351 | 24059752 | .     | .        | .        | .         | .              | .              |
| chr22 | 24951714 | 24952115 | .     | .        | .        | .         | .              | .              |
| chr22 | 29137702 | 29138103 | .     | .        | .        | .         | .              | .              |
| chr22 | 29168455 | 29168856 | chr22 | 29168411 | 29168508 | MIR       | SINE           | MIR            |
| chr22 | 30162815 | 30163216 | .     | .        | .        | .         | .              | .              |
| chr22 | 30752442 | 30752843 | chr22 | 30752393 | 30752541 | MER5A1    | DNA            | hAT-Charlie    |
| chr22 | 30819845 | 30820246 | .     | .        | .        | .         | .              | .              |
| chr22 | 30987989 | 30988390 | .     | .        | .        | .         | .              | .              |
| chr22 | 31743327 | 31743728 | chr22 | 31743717 | 31743855 | MIRc      | SINE           | MIR            |
| chr22 | 31795235 | 31795636 | .     | .        | .        | .         | .              | .              |
| chr22 | 36903006 | 36903407 | .     | .        | .        | .         | .              | .              |
| chr22 | 36925335 | 36925736 | chr22 | 36925645 | 36925755 | MIRb      | SINE           | MIR            |
| chr22 | 37447552 | 37447953 | chr22 | 37447628 | 37447681 | (CGGGG)n  | Simple_repeat  | Simple_repeat  |
| chr22 | 37447552 | 37447953 | chr22 | 37447824 | 37447856 | GC_rich   | Low_complexity | Low_complexity |
| chr22 | 38245166 | 38245567 | chr22 | 38244999 | 38245287 | AluSp     | SINE           | Alu            |
| chr22 | 38349479 | 38349880 | .     | .        | .        | .         | .              | .              |
| chr22 | 39898172 | 39898573 | .     | .        | .        | .         | .              | .              |
| chr22 | 40766360 | 40766761 | chr22 | 40766061 | 40766379 | AluSx1    | SINE           | Alu            |
| chr22 | 41215017 | 41215418 | .     | .        | .        | .         | .              | .              |
| chr22 | 41600972 | 41601373 | chr22 | 41600983 | 41601045 | L2a       | LINE           | L2             |
| chr22 | 41682155 | 41682556 | .     | .        | .        | .         | .              | .              |
| chr22 | 41844513 | 41844914 | chr22 | 41844472 | 41844523 | C-rich    | Low_complexity | Low_complexity |
| chr22 | 41844513 | 41844914 | chr22 | 41844759 | 41844899 | MIRb      | SINE           | MIR            |
| chr22 | 41864483 | 41864884 | .     | .        | .        | .         | .              | .              |
| chr22 | 42342158 | 42342559 | .     | .        | .        | .         | .              | .              |
| chr22 | 42915576 | 42915977 | .     | .        | .        | .         | .              | .              |
| chr22 | 42977832 | 42978233 | .     | .        | .        | .         | .              | .              |
| chr22 | 43010819 | 43011220 | .     | .        | .        | .         | .              | .              |
| chr22 | 43485275 | 43485676 | chr22 | 43485407 | 43485428 | GC_rich   | Low_complexity | Low_complexity |
| chr22 | 43583503 | 43583904 | chr22 | 43583855 | 43584015 | BLACKJACK | DNA            | hAT-Blackjack  |
| chr22 | 44208145 | 44208546 | .     | .        | .        | .         | .              | .              |
| chr22 | 44351034 | 44351435 | .     | .        | .        | .         | .              | .              |
| chr22 | 46692505 | 46692906 | .     | .        | .        | .         | .              | .              |
| chr22 | 47158578 | 47158979 | .     | .        | .        | .         | .              | .              |
| chr22 | 50624057 | 50624458 | chr22 | 50623959 | 50624156 | MIRc      | SINE           | MIR            |
| chr22 | 50624057 | 50624458 | chr22 | 50624167 | 50624205 | GC_rich   | Low_complexity | Low_complexity |
| chr22 | 50624057 | 50624458 | chr22 | 50624311 | 50624350 | (CCCCG)n  | Simple_repeat  | Simple_repeat  |
| chr22 | 50624057 | 50624458 | chr22 | 50624455 | 50624551 | G-rich    | Low_complexity | Low_complexity |
| chr22 | 50638205 | 50638606 | .     | .        | .        | .         | .              | .              |
| chr22 | 50963509 | 50963910 | .     | .        | .        | .         | .              | .              |
| chr22 | 51020766 | 51021167 | chr22 | 51020832 | 51020891 | GC_rich   | Low_complexity | Low_complexity |
| chr3  | 3221187  | 3221588  | .     | .        | .        | .         | .              | .              |
| chr3  | 4344785  | 4345186  | chr3  | 4345170  | 4345204  | GC_rich   | Low_complexity | Low_complexity |
| chr3  | 4534730  | 4535131  | chr3  | 4535084  | 4535136  | (GGA)n    | Simple_repeat  | Simple_repeat  |
| chr3  | 9004970  | 9005371  | .     | .        | .        | .         | .              | .              |
| chr3  | 9404613  | 9405014  | .     | .        | .        | .         | .              | .              |
| chr3  | 9438548  | 9438949  | .     | .        | .        | .         | .              | .              |
| chr3  | 9958599  | 9959000  | .     | .        | .        | .         | .              | .              |
| chr3  | 11313771 | 11314172 | .     | .        | .        | .         | .              | .              |
| chr3  | 12598242 | 12598643 | .     | .        | .        | .         | .              | .              |
| chr3  | 12882865 | 12883266 | .     | .        | .        | .         | .              | .              |
| chr3  | 14166202 | 14166603 | .     | .        | .        | .         | .              | .              |
| chr3  | 14219693 | 14220094 | .     | .        | .        | .         | .              | .              |
| chr3  | 14692899 | 14693300 | .     | .        | .        | .         | .              | .              |
| chr3  | 15106650 | 15107051 | .     | .        | .        | .         | .              | .              |
| chr3  | 15373616 | 15374017 | chr3  | 15373790 | 15373853 | CT-rich   | Low_complexity | Low_complexity |
| chr3  | 15643309 | 15643710 | .     | .        | .        | .         | .              | .              |
| chr3  | 23958363 | 23958764 | .     | .        | .        | .         | .              | .              |
| chr3  | 25469471 | 25469872 | .     | .        | .        | .         | .              | .              |
| chr3  | 28390395 | 28390796 | chr3  | 28390635 | 28390663 | GC_rich   | Low_complexity | Low_complexity |
| chr3  | 32147726 | 32148127 | chr3  | 32148050 | 32148082 | GC_rich   | Low_complexity | Low_complexity |
| chr3  | 33481999 | 33482400 | .     | .        | .        | .         | .              | .              |
| chr3  | 37217678 | 37218079 | .     | .        | .        | .         | .              | .              |
| chr3  | 37284987 | 37285388 | .     | .        | .        | .         | .              | .              |
| chr3  | 39196005 | 39196406 | chr3  | 39195993 | 39196174 | L2c       | LINE           | L2             |
| chr3  | 39424658 | 39425059 | .     | .        | .        | .         | .              | .              |
| chr3  | 39448247 | 39448648 | .     | .        | .        | .         | .              | .              |
| chr3  | 40350920 | 40351321 | chr3  | 40351234 | 40351276 | (TCC)n    | Simple_repeat  | Simple_repeat  |
| chr3  | 40498478 | 40498879 | chr3  | 40498717 | 40498742 | (CACG)n   | Simple_repeat  | Simple_repeat  |
| chr3  | 41240634 | 41241035 | .     | .        | .        | .         | .              | .              |
| chr3  | 43147410 | 43147811 | .     | .        | .        | .         | .              | .              |
| chr3  | 44802965 | 44803366 | .     | .        | .        | .         | .              | .              |
| chr3  | 45429843 | 45430244 | chr3  | 45429935 | 45429977 | GC_rich   | Low_complexity | Low_complexity |
| chr3  | 46037136 | 46037537 | .     | .        | .        | .         | .              | .              |
| chr3  | 47018035 | 47018436 | chr3  | 47018369 | 47018406 | (CCCCG)n  | Simple_repeat  | Simple_repeat  |
| chr3  | 47422221 | 47422622 | .     | .        | .        | .         | .              | .              |
| chr3  | 47517259 | 47517660 | chr3  | 47517313 | 47517356 | (CGG)n    | Simple_repeat  | Simple_repeat  |
| chr3  | 47517259 | 47517660 | chr3  | 47517573 | 47517596 | (CCGGG)n  | Simple_repeat  | Simple_repeat  |
| chr3  | 47554707 | 47555108 | chr3  | 47554481 | 47554781 | AluSx     | SINE           | Alu            |
| chr3  | 47844390 | 47844791 | .     | .        | .        | .         | .              | .              |
| chr3  | 48229998 | 48230399 | .     | .        | .        | .         | .              | .              |
| chr3  | 48282319 | 48282720 | .     | .        | .        | .         | .              | .              |
| chr3  | 48481356 | 48481757 | chr3  | 48481231 | 48481413 | L2        | LINE           | L2             |

|      |           |           |      |           |           |           |                |                |
|------|-----------|-----------|------|-----------|-----------|-----------|----------------|----------------|
| chr3 | 48936167  | 48936568  | chr3 | 48936537  | 48937014  | L2a       | LINE           | L2             |
| chr3 | 48956099  | 48956500  | .    | .         | .         | .         | .              | .              |
| chr3 | 49203644  | 49204045  | .    | .         | .         | .         | .              | .              |
| chr3 | 49449386  | 49449787  | .    | .         | .         | .         | .              | .              |
| chr3 | 49466525  | 49466926  | chr3 | 49466847  | 49467152  | AluSx1    | SINE           | Alu            |
| chr3 | 49967115  | 49967516  | .    | .         | .         | .         | .              | .              |
| chr3 | 49977246  | 49977647  | .    | .         | .         | .         | .              | .              |
| chr3 | 50126135  | 50126536  | .    | .         | .         | .         | .              | .              |
| chr3 | 50329750  | 50330151  | .    | .         | .         | .         | .              | .              |
| chr3 | 50365571  | 50365972  | .    | .         | .         | .         | .              | .              |
| chr3 | 50388333  | 50388734  | .    | .         | .         | .         | .              | .              |
| chr3 | 50396915  | 50397316  | .    | .         | .         | .         | .              | .              |
| chr3 | 50606644  | 50607045  | .    | .         | .         | .         | .              | .              |
| chr3 | 51534108  | 51534509  | chr3 | 51534132  | 51534168  | (A)n      | Simple_repeat  | Simple_repeat  |
| chr3 | 52007812  | 52008213  | .    | .         | .         | .         | .              | .              |
| chr3 | 52029725  | 52030126  | .    | .         | .         | .         | .              | .              |
| chr3 | 52188538  | 52188939  | chr3 | 52188810  | 52188844  | AluSp     | SINE           | Alu            |
| chr3 | 52312401  | 52312802  | chr3 | 52312377  | 52312472  | (CGGGG)n  | Simple_repeat  | Simple_repeat  |
| chr3 | 52312401  | 52312802  | chr3 | 52312701  | 52312787  | (CGGGG)n  | Simple_repeat  | Simple_repeat  |
| chr3 | 52739888  | 52740289  | .    | .         | .         | .         | .              | .              |
| chr3 | 53381480  | 53381881  | .    | .         | .         | .         | .              | .              |
| chr3 | 57541589  | 57541990  | .    | .         | .         | .         | .              | .              |
| chr3 | 57583209  | 57583610  | .    | .         | .         | .         | .              | .              |
| chr3 | 57741759  | 57742160  | .    | .         | .         | .         | .              | .              |
| chr3 | 58419652  | 58420053  | chr3 | 58419926  | 58420018  | L3        | LINE           | CR1            |
| chr3 | 58419652  | 58420053  | chr3 | 58420042  | 58420179  | MIR       | SINE           | MIR            |
| chr3 | 61235645  | 61236046  | chr3 | 61235607  | 61235664  | (CA)n     | Simple_repeat  | Simple_repeat  |
| chr3 | 67048350  | 67048751  | .    | .         | .         | .         | .              | .              |
| chr3 | 69135458  | 69135859  | .    | .         | .         | .         | .              | .              |
| chr3 | 69788302  | 69788703  | .    | .         | .         | .         | .              | .              |
| chr3 | 75834624  | 75835025  | .    | .         | .         | .         | .              | .              |
| chr3 | 88198802  | 88199203  | .    | .         | .         | .         | .              | .              |
| chr3 | 97483157  | 97483558  | .    | .         | .         | .         | .              | .              |
| chr3 | 98241705  | 98242106  | chr3 | 98241803  | 98241853  | GC-rich   | Low_complexity | Low_complexity |
| chr3 | 98241705  | 98242106  | chr3 | 98242010  | 98242145  | MIR3      | SINE           | MIR            |
| chr3 | 98312309  | 98312710  | .    | .         | .         | .         | .              | .              |
| chr3 | 99979414  | 99979815  | chr3 | 99979587  | 99979610  | GC-rich   | Low_complexity | Low_complexity |
| chr3 | 100119774 | 100120175 | .    | .         | .         | .         | .              | .              |
| chr3 | 101405321 | 101405722 | .    | .         | .         | .         | .              | .              |
| chr3 | 101443563 | 101443964 | .    | .         | .         | .         | .              | .              |
| chr3 | 101497850 | 101498251 | .    | .         | .         | .         | .              | .              |
| chr3 | 112709552 | 112709953 | .    | .         | .         | .         | .              | .              |
| chr3 | 112738070 | 112738471 | .    | .         | .         | .         | .              | .              |
| chr3 | 113464890 | 113465291 | chr3 | 113465097 | 113465129 | GC-rich   | Low_complexity | Low_complexity |
| chr3 | 113775245 | 113775646 | .    | .         | .         | .         | .              | .              |
| chr3 | 119217107 | 119217508 | chr3 | 119216948 | 119217116 | AluSq     | SINE           | Alu            |
| chr3 | 119395788 | 119396189 | chr3 | 119395850 | 119395879 | (CGGGG)n  | Simple_repeat  | Simple_repeat  |
| chr3 | 119395788 | 119396189 | chr3 | 119395884 | 119395972 | G-rich    | Low_complexity | Low_complexity |
| chr3 | 120461013 | 120461414 | chr3 | 120461002 | 120461028 | AT-rich   | Low_complexity | Low_complexity |
| chr3 | 121468630 | 121469031 | .    | .         | .         | .         | .              | .              |
| chr3 | 122233656 | 122234057 | .    | .         | .         | .         | .              | .              |
| chr3 | 122785619 | 122786020 | chr3 | 122785538 | 122785705 | MIRb      | SINE           | MIR            |
| chr3 | 122920599 | 122921000 | .    | .         | .         | .         | .              | .              |
| chr3 | 123304110 | 123304511 | .    | .         | .         | .         | .              | .              |
| chr3 | 124449099 | 124449500 | .    | .         | .         | .         | .              | .              |
| chr3 | 125094018 | 125094419 | chr3 | 125094091 | 125094146 | (TCC)n    | Simple_repeat  | Simple_repeat  |
| chr3 | 126422816 | 126423217 | chr3 | 126423202 | 126423323 | (CGGGG)n  | Simple_repeat  | Simple_repeat  |
| chr3 | 127770910 | 127771311 | chr3 | 127771156 | 127771182 | (CGCGG)n  | Simple_repeat  | Simple_repeat  |
| chr3 | 127770910 | 127771311 | chr3 | 127771236 | 127771260 | (CCGGG)n  | Simple_repeat  | Simple_repeat  |
| chr3 | 127842597 | 127842998 | .    | .         | .         | .         | .              | .              |
| chr3 | 128879906 | 128880307 | .    | .         | .         | .         | .              | .              |
| chr3 | 128902733 | 128903134 | .    | .         | .         | .         | .              | .              |
| chr3 | 129118083 | 129118484 | chr3 | 129117915 | 129118219 | AluSx1    | SINE           | Alu            |
| chr3 | 129409184 | 129409585 | chr3 | 129409328 | 129409481 | MLT11     | LTR            | ERV1-MaLR      |
| chr3 | 130745492 | 130745893 | .    | .         | .         | .         | .              | .              |
| chr3 | 139062623 | 139063024 | .    | .         | .         | .         | .              | .              |
| chr3 | 149470176 | 149470577 | chr3 | 149470412 | 149470519 | L2a       | LINE           | L2             |
| chr3 | 149470176 | 149470577 | chr3 | 149470528 | 149470707 | MIR       | SINE           | MIR            |
| chr3 | 150264346 | 150264747 | .    | .         | .         | .         | .              | .              |
| chr3 | 151986606 | 151987007 | .    | .         | .         | .         | .              | .              |
| chr3 | 155572130 | 155572531 | chr3 | 155572394 | 155572417 | GC-rich   | Low_complexity | Low_complexity |
| chr3 | 156272891 | 156273292 | .    | .         | .         | .         | .              | .              |
| chr3 | 156877793 | 156878194 | chr3 | 156877772 | 156877800 | (TCG)n    | Simple_repeat  | Simple_repeat  |
| chr3 | 158288737 | 158289138 | .    | .         | .         | .         | .              | .              |
| chr3 | 158362101 | 158362502 | .    | .         | .         | .         | .              | .              |
| chr3 | 160117200 | 160117601 | .    | .         | .         | .         | .              | .              |
| chr3 | 160472728 | 160473129 | .    | .         | .         | .         | .              | .              |
| chr3 | 167452563 | 167452964 | .    | .         | .         | .         | .              | .              |
| chr3 | 169939683 | 169940084 | .    | .         | .         | .         | .              | .              |
| chr3 | 178865704 | 178866105 | .    | .         | .         | .         | .              | .              |
| chr3 | 180319693 | 180320094 | .    | .         | .         | .         | .              | .              |
| chr3 | 180630320 | 180630721 | chr3 | 180630373 | 180630423 | C-rich    | Low_complexity | Low_complexity |
| chr3 | 183353121 | 183353522 | .    | .         | .         | .         | .              | .              |
| chr3 | 183602506 | 183602907 | .    | .         | .         | .         | .              | .              |
| chr3 | 183735612 | 183736013 | .    | .         | .         | .         | .              | .              |
| chr3 | 183851823 | 183852224 | chr3 | 183851726 | 183851863 | L3b       | LINE           | CR1            |
| chr3 | 183892379 | 183892780 | chr3 | 183892288 | 183892406 | L1M4b     | LINE           | L1             |
| chr3 | 183892379 | 183892780 | chr3 | 183892599 | 183892642 | GC-rich   | Low_complexity | Low_complexity |
| chr3 | 183903545 | 183903946 | .    | .         | .         | .         | .              | .              |
| chr3 | 184016604 | 184017005 | .    | .         | .         | .         | .              | .              |
| chr3 | 184054650 | 184055051 | .    | .         | .         | .         | .              | .              |
| chr3 | 186524027 | 186524428 | .    | .         | .         | .         | .              | .              |
| chr3 | 196466399 | 196466800 | .    | .         | .         | .         | .              | .              |
| chr3 | 196669196 | 196669597 | .    | .         | .         | .         | .              | .              |
| chr3 | 197676855 | 197677256 | .    | .         | .         | .         | .              | .              |
| chr4 | 667888    | 668289    | chr4 | 667798    | 667960    | G-rich    | Low_complexity | Low_complexity |
| chr4 | 699025    | 699426    | chr4 | 698745    | 699213    | (CCCTAA)n | Simple_repeat  | Simple_repeat  |
| chr4 | 699025    | 699426    | chr4 | 699382    | 699537    | (CCCCG)n  | Simple_repeat  | Simple_repeat  |
| chr4 | 1283429   | 1283830   | chr4 | 1283827   | 1283900   | GC-rich   | Low_complexity | Low_complexity |
| chr4 | 1722731   | 1723132   | chr4 | 1722740   | 1722765   | GC-rich   | Low_complexity | Low_complexity |
| chr4 | 1722731   | 1723132   | chr4 | 1722782   | 1722807   | GC-rich   | Low_complexity | Low_complexity |
| chr4 | 1857830   | 1858231   | chr4 | 1857873   | 1857902   | GC-rich   | Low_complexity | Low_complexity |
| chr4 | 2243665   | 2244066   | chr4 | 2244022   | 2244164   | (CGGGG)n  | Simple_repeat  | Simple_repeat  |
| chr4 | 2420415   | 2420816   | chr4 | 2420399   | 2420533   | GC-rich   | Low_complexity | Low_complexity |
| chr4 | 2470340   | 2470741   | chr4 | 2470617   | 2470640   | GC-rich   | Low_complexity | Low_complexity |

|      |           |           |      |           |           |          |                |                |
|------|-----------|-----------|------|-----------|-----------|----------|----------------|----------------|
| chr4 | 2965048   | 2965449   | chr4 | 2965357   | 2965397   | GC_rich  | Low_complexity | Low_complexity |
| chr4 | 3076215   | 3076616   | chr4 | 3076330   | 3076379   | GC_rich  | Low_complexity | Low_complexity |
| chr4 | 3076215   | 3076616   | chr4 | 3076603   | 3076667   | (CAG)n   | Simple_repeat  | Simple_repeat  |
| chr4 | 3534019   | 3534420   | .    | .         | .         | .        | .              | .              |
| chr4 | 4543606   | 4544007   | .    | .         | .         | .        | .              | .              |
| chr4 | 8160531   | 8160932   | chr4 | 8160482   | 8160644   | C-rich   | Low_complexity | Low_complexity |
| chr4 | 8160531   | 8160932   | chr4 | 8160921   | 8161105   | MIR3     | SINE           | MIR            |
| chr4 | 13629162  | 13629563  | chr4 | 13629121  | 13629194  | (CGG)n   | Simple_repeat  | Simple_repeat  |
| chr4 | 18023619  | 18024020  | .    | .         | .         | .        | .              | .              |
| chr4 | 25161856  | 25162257  | chr4 | 25162105  | 25162140  | (CAAAA)n | Simple_repeat  | Simple_repeat  |
| chr4 | 25314163  | 25314564  | .    | .         | .         | .        | .              | .              |
| chr4 | 25915664  | 25916065  | chr4 | 25915702  | 25915814  | C-rich   | Low_complexity | Low_complexity |
| chr4 | 26585448  | 26585849  | .    | .         | .         | .        | .              | .              |
| chr4 | 41936905  | 41937306  | .    | .         | .         | .        | .              | .              |
| chr4 | 47916623  | 47917024  | .    | .         | .         | .        | .              | .              |
| chr4 | 48832882  | 48833283  | .    | .         | .         | .        | .              | .              |
| chr4 | 52710758  | 52711159  | chr4 | 52710955  | 52710976  | GC_rich  | Low_complexity | Low_complexity |
| chr4 | 56252190  | 56252591  | chr4 | 56251940  | 56252287  | MLT2C1   | LTR            | ERV_L          |
| chr4 | 56252190  | 56252591  | chr4 | 56252292  | 56252750  | MLT1J    | LTR            | ERV_L-MaLR     |
| chr4 | 57333566  | 57333967  | .    | .         | .         | .        | .              | .              |
| chr4 | 57843622  | 57844023  | .    | .         | .         | .        | .              | .              |
| chr4 | 57844832  | 57845233  | .    | .         | .         | .        | .              | .              |
| chr4 | 69215588  | 69215989  | .    | .         | .         | .        | .              | .              |
| chr4 | 71553959  | 71554360  | .    | .         | .         | .        | .              | .              |
| chr4 | 88141601  | 88142002  | chr4 | 88141700  | 88141729  | GC_rich  | Low_complexity | Low_complexity |
| chr4 | 88343542  | 88343943  | .    | .         | .         | .        | .              | .              |
| chr4 | 89444687  | 89445088  | .    | .         | .         | .        | .              | .              |
| chr4 | 99850165  | 99850566  | chr4 | 99850450  | 99850470  | (T)n     | Simple_repeat  | Simple_repeat  |
| chr4 | 100484950 | 100485351 | .    | .         | .         | .        | .              | .              |
| chr4 | 100815380 | 100815781 | chr4 | 100815685 | 100815751 | (CCCCG)n | Simple_repeat  | Simple_repeat  |
| chr4 | 104020845 | 104021246 | .    | .         | .         | .        | .              | .              |
| chr4 | 106395051 | 106395452 | .    | .         | .         | .        | .              | .              |
| chr4 | 106629690 | 106630091 | .    | .         | .         | .        | .              | .              |
| chr4 | 108641354 | 108641755 | .    | .         | .         | .        | .              | .              |
| chr4 | 109541516 | 109541917 | .    | .         | .         | .        | .              | .              |
| chr4 | 119604721 | 119605122 | chr4 | 119604494 | 119605003 | LTR33A   | LTR            | ERV_L          |
| chr4 | 119604721 | 119605122 | chr4 | 119605050 | 119605167 | L2a      | LINE           | L2             |
| chr4 | 123844011 | 123844412 | .    | .         | .         | .        | .              | .              |
| chr4 | 128886250 | 128886651 | .    | .         | .         | .        | .              | .              |
| chr4 | 140004881 | 140005282 | .    | .         | .         | .        | .              | .              |
| chr4 | 140222384 | 140222785 | .    | .         | .         | .        | .              | .              |
| chr4 | 141445194 | 141445595 | .    | .         | .         | .        | .              | .              |
| chr4 | 144105946 | 144106347 | chr4 | 144105927 | 144105983 | G-rich   | Low_complexity | Low_complexity |
| chr4 | 144257050 | 144257451 | chr4 | 144257279 | 144257321 | (TCCC)n  | Simple_repeat  | Simple_repeat  |
| chr4 | 144257050 | 144257451 | chr4 | 144257404 | 144257471 | G-rich   | Low_complexity | Low_complexity |
| chr4 | 146101548 | 146101949 | .    | .         | .         | .        | .              | .              |
| chr4 | 152020491 | 152020892 | .    | .         | .         | .        | .              | .              |
| chr4 | 152681967 | 152682368 | .    | .         | .         | .        | .              | .              |
| chr4 | 159593041 | 159593442 | .    | .         | .         | .        | .              | .              |
| chr4 | 169931355 | 169931756 | chr4 | 169931681 | 169931767 | MER81    | DNA            | hAT-Blackjack  |
| chr4 | 170678867 | 170679268 | .    | .         | .         | .        | .              | .              |
| chr4 | 174255892 | 174256293 | .    | .         | .         | .        | .              | .              |
| chr4 | 174291784 | 174292185 | chr4 | 174291850 | 174291872 | (A)n     | Simple_repeat  | Simple_repeat  |
| chr4 | 184365488 | 184365889 | .    | .         | .         | .        | .              | .              |
| chr4 | 184425262 | 184425663 | .    | .         | .         | .        | .              | .              |
| chr4 | 186316960 | 186317361 | .    | .         | .         | .        | .              | .              |
| chr4 | 186346957 | 186347358 | .    | .         | .         | .        | .              | .              |
| chr4 | 190861721 | 190862122 | .    | .         | .         | .        | .              | .              |
| chr5 | 218935    | 219336    | .    | .         | .         | .        | .              | .              |
| chr5 | 271420    | 271821    | chr5 | 271129    | 271426    | AluIb    | SINE           | Alu            |
| chr5 | 892785    | 893186    | chr5 | 892772    | 892804    | GC_rich  | Low_complexity | Low_complexity |
| chr5 | 1345045   | 1345446   | chr5 | 1344956   | 1345049   | GC_rich  | Low_complexity | Low_complexity |
| chr5 | 1345045   | 1345446   | chr5 | 1345168   | 1345204   | GC_rich  | Low_complexity | Low_complexity |
| chr5 | 1633868   | 1634269   | chr5 | 1633710   | 1633897   | G-rich   | Low_complexity | Low_complexity |
| chr5 | 1708002   | 1708403   | chr5 | 1708131   | 1708164   | (TG)n    | Simple_repeat  | Simple_repeat  |
| chr5 | 1708002   | 1708403   | chr5 | 1708190   | 1708349   | (TG)n    | Simple_repeat  | Simple_repeat  |
| chr5 | 5422160   | 5422561   | .    | .         | .         | .        | .              | .              |
| chr5 | 6378310   | 6378711   | .    | .         | .         | .        | .              | .              |
| chr5 | 6448276   | 6448677   | chr5 | 6448090   | 6448732   | (CA)n    | Simple_repeat  | Simple_repeat  |
| chr5 | 6585022   | 6585423   | chr5 | 6585124   | 6585528   | MLT1C    | LTR            | ERV_L-MaLR     |
| chr5 | 7869337   | 7869738   | .    | .         | .         | .        | .              | .              |
| chr5 | 8458027   | 8458428   | .    | .         | .         | .        | .              | .              |
| chr5 | 10250256  | 10250657  | .    | .         | .         | .        | .              | .              |
| chr5 | 10352012  | 10352413  | .    | .         | .         | .        | .              | .              |
| chr5 | 10353181  | 10353582  | .    | .         | .         | .        | .              | .              |
| chr5 | 14664611  | 14665012  | chr5 | 14664992  | 14665064  | GC_rich  | Low_complexity | Low_complexity |
| chr5 | 16465781  | 16466182  | .    | .         | .         | .        | .              | .              |
| chr5 | 16616285  | 16616686  | .    | .         | .         | .        | .              | .              |
| chr5 | 16935964  | 16936365  | .    | .         | .         | .        | .              | .              |
| chr5 | 17216334  | 17216735  | .    | .         | .         | .        | .              | .              |
| chr5 | 17386834  | 17387235  | chr5 | 17386705  | 17386837  | FLAM_C   | SINE           | Alu            |
| chr5 | 17386834  | 17387235  | chr5 | 17386839  | 17386893  | (GGAA)n  | Simple_repeat  | Simple_repeat  |
| chr5 | 31532131  | 31532532  | .    | .         | .         | .        | .              | .              |
| chr5 | 32173505  | 32173906  | chr5 | 32173864  | 32173913  | GC_rich  | Low_complexity | Low_complexity |
| chr5 | 32444693  | 32445094  | chr5 | 32444926  | 32444968  | GC_rich  | Low_complexity | Low_complexity |
| chr5 | 32444693  | 32445094  | chr5 | 32445015  | 32445044  | GC_rich  | Low_complexity | Low_complexity |
| chr5 | 32710462  | 32710863  | .    | .         | .         | .        | .              | .              |
| chr5 | 32712241  | 32712642  | .    | .         | .         | .        | .              | .              |
| chr5 | 33441020  | 33441421  | chr5 | 33441413  | 33441577  | MIR3     | SINE           | MIR            |
| chr5 | 33984319  | 33984720  | .    | .         | .         | .        | .              | .              |
| chr5 | 34007791  | 34008192  | .    | .         | .         | .        | .              | .              |
| chr5 | 34657555  | 34657956  | .    | .         | .         | .        | .              | .              |
| chr5 | 34839113  | 34839514  | .    | .         | .         | .        | .              | .              |
| chr5 | 34914886  | 34915287  | chr5 | 34915136  | 34915266  | MIRb     | SINE           | MIR            |
| chr5 | 34930104  | 34930505  | .    | .         | .         | .        | .              | .              |
| chr5 | 35618036  | 35618437  | .    | .         | .         | .        | .              | .              |
| chr5 | 36151935  | 36152336  | .    | .         | .         | .        | .              | .              |
| chr5 | 36242295  | 36242696  | .    | .         | .         | .        | .              | .              |
| chr5 | 37249105  | 37249506  | .    | .         | .         | .        | .              | .              |
| chr5 | 37370725  | 37371126  | .    | .         | .         | .        | .              | .              |
| chr5 | 37379115  | 37379516  | chr5 | 37379044  | 37379208  | AluSx    | SINE           | Alu            |
| chr5 | 38557324  | 38557725  | .    | .         | .         | .        | .              | .              |
| chr5 | 38846273  | 38846674  | .    | .         | .         | .        | .              | .              |
| chr5 | 39073483  | 39073884  | .    | .         | .         | .        | .              | .              |
| chr5 | 39424365  | 39424766  | chr5 | 39424572  | 39424630  | (CA)n    | Simple_repeat  | Simple_repeat  |

|      |           |           |      |           |           |           |                |                |
|------|-----------|-----------|------|-----------|-----------|-----------|----------------|----------------|
| chr5 | 40679503  | 40679904  | chr5 | 40679837  | 40679909  | (CCCCG)n  | Simple_repeat  | Simple_repeat  |
| chr5 | 40755891  | 40756292  | .    | .         | .         | .         | .              | .              |
| chr5 | 40835201  | 40835602  | chr5 | 40835582  | 40835614  | (CTG)n    | Simple_repeat  | Simple_repeat  |
| chr5 | 41509557  | 41509958  | .    | .         | .         | .         | .              | .              |
| chr5 | 41870045  | 41870446  | .    | .         | .         | .         | .              | .              |
| chr5 | 41904055  | 41904456  | .    | .         | .         | .         | .              | .              |
| chr5 | 41925646  | 41926047  | .    | .         | .         | .         | .              | .              |
| chr5 | 42757502  | 42757903  | .    | .         | .         | .         | .              | .              |
| chr5 | 43017997  | 43018398  | .    | .         | .         | .         | .              | .              |
| chr5 | 43042599  | 43043000  | .    | .         | .         | .         | .              | .              |
| chr5 | 43066936  | 43067337  | .    | .         | .         | .         | .              | .              |
| chr5 | 43121294  | 43121695  | .    | .         | .         | .         | .              | .              |
| chr5 | 43192624  | 43193025  | chr5 | 43192763  | 43192889  | (CGTG)n   | Simple_repeat  | Simple_repeat  |
| chr5 | 43312876  | 43313277  | .    | .         | .         | .         | .              | .              |
| chr5 | 43483817  | 43484218  | .    | .         | .         | .         | .              | .              |
| chr5 | 43603472  | 43603873  | .    | .         | .         | .         | .              | .              |
| chr5 | 44808994  | 44809395  | .    | .         | .         | .         | .              | .              |
| chr5 | 54528401  | 54528802  | chr5 | 54528560  | 54528691  | MIRb      | SINE           | MIR            |
| chr5 | 54528401  | 54528802  | chr5 | 54528695  | 54528813  | MIRc      | SINE           | MIR            |
| chr5 | 54603614  | 54604015  | chr5 | 54603661  | 54603700  | A-rich    | Low_complexity | Low_complexity |
| chr5 | 55008027  | 55008428  | .    | .         | .         | .         | .              | .              |
| chr5 | 56205699  | 56206100  | .    | .         | .         | .         | .              | .              |
| chr5 | 56468410  | 56468811  | .    | .         | .         | .         | .              | .              |
| chr5 | 57878617  | 57879018  | .    | .         | .         | .         | .              | .              |
| chr5 | 61699638  | 61700039  | .    | .         | .         | .         | .              | .              |
| chr5 | 64919957  | 64920358  | .    | .         | .         | .         | .              | .              |
| chr5 | 68389644  | 68390045  | .    | .         | .         | .         | .              | .              |
| chr5 | 68485208  | 68485609  | .    | .         | .         | .         | .              | .              |
| chr5 | 70751246  | 70751647  | .    | .         | .         | .         | .              | .              |
| chr5 | 74062798  | 74063199  | .    | .         | .         | .         | .              | .              |
| chr5 | 74807503  | 74807904  | chr5 | 74807455  | 74807532  | C-rich    | Low_complexity | Low_complexity |
| chr5 | 78280266  | 78280667  | chr5 | 78280524  | 78280557  | GC-rich   | Low_complexity | Low_complexity |
| chr5 | 78908120  | 78908521  | chr5 | 78908161  | 78908219  | G-rich    | Low_complexity | Low_complexity |
| chr5 | 81267789  | 81268190  | .    | .         | .         | .         | .              | .              |
| chr5 | 81574065  | 81574466  | .    | .         | .         | .         | .              | .              |
| chr5 | 85913485  | 85913886  | .    | .         | .         | .         | .              | .              |
| chr5 | 87564535  | 87564936  | .    | .         | .         | .         | .              | .              |
| chr5 | 89705682  | 89706083  | chr5 | 89706033  | 89706201  | MER5A     | DNA            | hAT-Charlie    |
| chr5 | 93954151  | 93954552  | .    | .         | .         | .         | .              | .              |
| chr5 | 94890606  | 94891007  | .    | .         | .         | .         | .              | .              |
| chr5 | 98264981  | 98265382  | .    | .         | .         | .         | .              | .              |
| chr5 | 102455664 | 102456065 | .    | .         | .         | .         | .              | .              |
| chr5 | 102898439 | 102898840 | chr5 | 102898509 | 102898547 | GC-rich   | Low_complexity | Low_complexity |
| chr5 | 107007741 | 107008142 | .    | .         | .         | .         | .              | .              |
| chr5 | 110427859 | 110428260 | .    | .         | .         | .         | .              | .              |
| chr5 | 111496320 | 111496721 | .    | .         | .         | .         | .              | .              |
| chr5 | 112042827 | 112043228 | chr5 | 112042844 | 112042977 | L2c       | LINE           | L2             |
| chr5 | 114598409 | 114598810 | .    | .         | .         | .         | .              | .              |
| chr5 | 114961606 | 114962007 | chr5 | 114961983 | 114962084 | AluSz6    | SINE           | Alu            |
| chr5 | 118406182 | 118406583 | .    | .         | .         | .         | .              | .              |
| chr5 | 118787917 | 118788318 | .    | .         | .         | .         | .              | .              |
| chr5 | 121297304 | 121297705 | chr5 | 121297393 | 121297442 | (CA)n     | Simple_repeat  | Simple_repeat  |
| chr5 | 125936436 | 125936837 | .    | .         | .         | .         | .              | .              |
| chr5 | 131892445 | 131892846 | .    | .         | .         | .         | .              | .              |
| chr5 | 132112918 | 132113319 | chr5 | 132112985 | 132113042 | GC-rich   | Low_complexity | Low_complexity |
| chr5 | 132361980 | 132362381 | chr5 | 132362362 | 132362480 | G-rich    | Low_complexity | Low_complexity |
| chr5 | 133702700 | 133703101 | chr5 | 133703059 | 133703364 | AluSx     | SINE           | Alu            |
| chr5 | 133747446 | 133747847 | .    | .         | .         | .         | .              | .              |
| chr5 | 133968293 | 133968694 | .    | .         | .         | .         | .              | .              |
| chr5 | 134181480 | 134181881 | .    | .         | .         | .         | .              | .              |
| chr5 | 134734740 | 134735141 | chr5 | 134734863 | 134734906 | GC-rich   | Low_complexity | Low_complexity |
| chr5 | 134734740 | 134735141 | chr5 | 134734979 | 134735030 | GC-rich   | Low_complexity | Low_complexity |
| chr5 | 137514197 | 137514598 | .    | .         | .         | .         | .              | .              |
| chr5 | 137673314 | 137673715 | .    | .         | .         | .         | .              | .              |
| chr5 | 137800179 | 137800580 | .    | .         | .         | .         | .              | .              |
| chr5 | 138533754 | 138534155 | chr5 | 138534121 | 138534144 | GC-rich   | Low_complexity | Low_complexity |
| chr5 | 138609685 | 138610086 | .    | .         | .         | .         | .              | .              |
| chr5 | 138629234 | 138629635 | chr5 | 138629464 | 138629491 | (TCTCCC)n | Simple_repeat  | Simple_repeat  |
| chr5 | 138677762 | 138678163 | .    | .         | .         | .         | .              | .              |
| chr5 | 138775031 | 138775432 | chr5 | 138775286 | 138775493 | MIRc      | SINE           | MIR            |
| chr5 | 139944101 | 139944502 | .    | .         | .         | .         | .              | .              |
| chr5 | 140027232 | 140027633 | chr5 | 140027592 | 140027645 | (TG)n     | Simple_repeat  | Simple_repeat  |
| chr5 | 143550021 | 143550422 | .    | .         | .         | .         | .              | .              |
| chr5 | 145562116 | 145562517 | .    | .         | .         | .         | .              | .              |
| chr5 | 145826471 | 145826872 | .    | .         | .         | .         | .              | .              |
| chr5 | 148520733 | 148521134 | .    | .         | .         | .         | .              | .              |
| chr5 | 148930805 | 148931206 | .    | .         | .         | .         | .              | .              |
| chr5 | 149380037 | 149380438 | .    | .         | .         | .         | .              | .              |
| chr5 | 149736976 | 149737377 | chr5 | 149737041 | 149737063 | GC-rich   | Low_complexity | Low_complexity |
| chr5 | 149736976 | 149737377 | chr5 | 149737177 | 149737198 | GC-rich   | Low_complexity | Low_complexity |
| chr5 | 149829208 | 149829609 | .    | .         | .         | .         | .              | .              |
| chr5 | 150080400 | 150080801 | .    | .         | .         | .         | .              | .              |
| chr5 | 153418297 | 153418698 | .    | .         | .         | .         | .              | .              |
| chr5 | 157170574 | 157170975 | chr5 | 157170791 | 157170828 | GC-rich   | Low_complexity | Low_complexity |
| chr5 | 157170574 | 157170975 | chr5 | 157170958 | 157171007 | GC-rich   | Low_complexity | Low_complexity |
| chr5 | 157286009 | 157286410 | chr5 | 157286323 | 157286441 | MER5A     | DNA            | hAT-Charlie    |
| chr5 | 159435896 | 159436297 | chr5 | 159435566 | 159435911 | AluIb     | SINE           | Alu            |
| chr5 | 159546755 | 159547156 | chr5 | 159547037 | 159547095 | L2a       | LINE           | L2             |
| chr5 | 167913238 | 167913639 | .    | .         | .         | .         | .              | .              |
| chr5 | 168006553 | 168006954 | chr5 | 168006579 | 168006605 | (CCG)n    | Simple_repeat  | Simple_repeat  |
| chr5 | 170288466 | 170288867 | chr5 | 170288798 | 170288874 | (CCCCG)n  | Simple_repeat  | Simple_repeat  |
| chr5 | 171433558 | 171433959 | chr5 | 171433540 | 171433600 | (CGG)n    | Simple_repeat  | Simple_repeat  |
| chr5 | 171615282 | 171615683 | .    | .         | .         | .         | .              | .              |
| chr5 | 173043576 | 173043977 | chr5 | 173043548 | 173043606 | (CGG)n    | Simple_repeat  | Simple_repeat  |
| chr5 | 173043576 | 173043977 | chr5 | 173043955 | 173044064 | MER5A     | DNA            | hAT-Charlie    |
| chr5 | 175395107 | 175395508 | .    | .         | .         | .         | .              | .              |
| chr5 | 175788652 | 175789053 | .    | .         | .         | .         | .              | .              |
| chr5 | 175792231 | 175792632 | .    | .         | .         | .         | .              | .              |
| chr5 | 175815434 | 175815835 | .    | .         | .         | .         | .              | .              |
| chr5 | 176778778 | 176779179 | .    | .         | .         | .         | .              | .              |
| chr5 | 176829343 | 176829744 | .    | .         | .         | .         | .              | .              |
| chr5 | 176943944 | 176944345 | .    | .         | .         | .         | .              | .              |
| chr5 | 176981507 | 176981908 | chr5 | 176981490 | 176981538 | (CCG)n    | Simple_repeat  | Simple_repeat  |
| chr5 | 176981507 | 176981908 | chr5 | 176981843 | 176981957 | MIRc      | SINE           | MIR            |
| chr5 | 177018954 | 177019355 | chr5 | 177018883 | 177019024 | MIR3      | SINE           | MIR            |

|      |           |           |      |           |           |           |                |                |
|------|-----------|-----------|------|-----------|-----------|-----------|----------------|----------------|
| chr5 | 177026870 | 177027271 | chr5 | 177026865 | 177026952 | MIR3      | SINE           | MIR            |
| chr5 | 177026870 | 177027271 | chr5 | 177027060 | 177027172 | GC_rich   | Low_complexity | Low_complexity |
| chr5 | 177580683 | 177581084 | .    | .         | .         | .         | .              | .              |
| chr5 | 178157548 | 178157949 | .    | .         | .         | .         | .              | .              |
| chr5 | 178286719 | 178287120 | .    | .         | .         | .         | .              | .              |
| chr5 | 178322675 | 178323076 | chr5 | 178322422 | 178322707 | AluSq2    | SINE           | Alu            |
| chr5 | 178450520 | 178450921 | .    | .         | .         | .         | .              | .              |
| chr5 | 178487142 | 178487543 | .    | .         | .         | .         | .              | .              |
| chr5 | 179245871 | 179246272 | .    | .         | .         | .         | .              | .              |
| chr5 | 180237756 | 180238157 | .    | .         | .         | .         | .              | .              |
| chr6 | 2765419   | 2765820   | chr6 | 2765416   | 2765446   | GC_rich   | Low_complexity | Low_complexity |
| chr6 | 2765419   | 2765820   | chr6 | 2765819   | 2765856   | GC_rich   | Low_complexity | Low_complexity |
| chr6 | 5003717   | 5004118   | chr6 | 5003983   | 5004034   | GC_rich   | Low_complexity | Low_complexity |
| chr6 | 7590245   | 7590646   | .    | .         | .         | .         | .              | .              |
| chr6 | 11093754  | 11094155  | .    | .         | .         | .         | .              | .              |
| chr6 | 13407013  | 13407414  | chr6 | 13407121  | 13407284  | MLT1J     | LTR            | ERV1-MaLR      |
| chr6 | 13615337  | 13615738  | .    | .         | .         | .         | .              | .              |
| chr6 | 15245474  | 15245875  | chr6 | 15245423  | 15245515  | G-rich    | Low_complexity | Low_complexity |
| chr6 | 17707060  | 17707461  | chr6 | 17706983  | 17707146  | (CCG)n    | Simple_repeat  | Simple_repeat  |
| chr6 | 27342839  | 27343240  | .    | .         | .         | .         | .              | .              |
| chr6 | 27440801  | 27441202  | chr6 | 27440922  | 27440953  | GC_rich   | Low_complexity | Low_complexity |
| chr6 | 27440801  | 27441202  | chr6 | 27441148  | 27441453  | AluSx4    | SINE           | Alu            |
| chr6 | 28048487  | 28048888  | .    | .         | .         | .         | .              | .              |
| chr6 | 30312676  | 30313077  | .    | .         | .         | .         | .              | .              |
| chr6 | 30524867  | 30525268  | .    | .         | .         | .         | .              | .              |
| chr6 | 30594619  | 30595020  | .    | .         | .         | .         | .              | .              |
| chr6 | 30687737  | 30688138  | .    | .         | .         | .         | .              | .              |
| chr6 | 30854087  | 30854488  | .    | .         | .         | .         | .              | .              |
| chr6 | 30875656  | 30876057  | chr6 | 30875957  | 30876011  | CT-rich   | Low_complexity | Low_complexity |
| chr6 | 30881870  | 30882271  | chr6 | 30881997  | 30882020  | GC_rich   | Low_complexity | Low_complexity |
| chr6 | 31165639  | 31166040  | .    | .         | .         | .         | .              | .              |
| chr6 | 31633524  | 31633925  | .    | .         | .         | .         | .              | .              |
| chr6 | 31802137  | 31802538  | chr6 | 31802039  | 31802177  | AluJb     | SINE           | Alu            |
| chr6 | 31802137  | 31802538  | chr6 | 31802331  | 31802354  | GC_rich   | Low_complexity | Low_complexity |
| chr6 | 31866128  | 31866529  | .    | .         | .         | .         | .              | .              |
| chr6 | 31926877  | 31927278  | .    | .         | .         | .         | .              | .              |
| chr6 | 32096043  | 32096444  | .    | .         | .         | .         | .              | .              |
| chr6 | 32097640  | 32098041  | .    | .         | .         | .         | .              | .              |
| chr6 | 33168078  | 33168479  | chr6 | 33168086  | 33168118  | (CCG)n    | Simple_repeat  | Simple_repeat  |
| chr6 | 33239526  | 33239927  | .    | .         | .         | .         | .              | .              |
| chr6 | 33257142  | 33257543  | .    | .         | .         | .         | .              | .              |
| chr6 | 33290624  | 33291025  | .    | .         | .         | .         | .              | .              |
| chr6 | 35227030  | 35227431  | .    | .         | .         | .         | .              | .              |
| chr6 | 36410507  | 36410908  | chr6 | 36410751  | 36410785  | GC_rich   | Low_complexity | Low_complexity |
| chr6 | 36853469  | 36853870  | .    | .         | .         | .         | .              | .              |
| chr6 | 36953725  | 36954126  | chr6 | 36953829  | 36953893  | (CCCCAG)n | Simple_repeat  | Simple_repeat  |
| chr6 | 38670800  | 38671201  | .    | .         | .         | .         | .              | .              |
| chr6 | 41703227  | 41703628  | chr6 | 41703223  | 41703306  | (CCG)n    | Simple_repeat  | Simple_repeat  |
| chr6 | 41703227  | 41703628  | chr6 | 41703307  | 41703329  | GC_rich   | Low_complexity | Low_complexity |
| chr6 | 41747492  | 41747893  | chr6 | 41747478  | 41747508  | (CGCG)n   | Simple_repeat  | Simple_repeat  |
| chr6 | 41747492  | 41747893  | chr6 | 41747518  | 41747590  | (CCCCG)n  | Simple_repeat  | Simple_repeat  |
| chr6 | 41747492  | 41747893  | chr6 | 41747634  | 41747655  | (CCCCG)n  | Simple_repeat  | Simple_repeat  |
| chr6 | 42018099  | 42018500  | chr6 | 42017841  | 42018135  | AluSz     | SINE           | Alu            |
| chr6 | 42018099  | 42018500  | chr6 | 42018204  | 42018228  | (CCCCG)n  | Simple_repeat  | Simple_repeat  |
| chr6 | 42185416  | 42185817  | .    | .         | .         | .         | .              | .              |
| chr6 | 42531441  | 42531842  | chr6 | 42531396  | 42531466  | L2a       | LINE           | L2             |
| chr6 | 42847176  | 42847577  | .    | .         | .         | .         | .              | .              |
| chr6 | 42981676  | 42982077  | .    | .         | .         | .         | .              | .              |
| chr6 | 43445134  | 43445535  | .    | .         | .         | .         | .              | .              |
| chr6 | 43596946  | 43597347  | chr6 | 43596939  | 43596962  | (CCG)n    | Simple_repeat  | Simple_repeat  |
| chr6 | 43603346  | 43603747  | .    | .         | .         | .         | .              | .              |
| chr6 | 43655322  | 43655723  | .    | .         | .         | .         | .              | .              |
| chr6 | 46620502  | 46620903  | .    | .         | .         | .         | .              | .              |
| chr6 | 52149630  | 52150031  | .    | .         | .         | .         | .              | .              |
| chr6 | 52860015  | 52860416  | chr6 | 52859938  | 52860041  | G-rich    | Low_complexity | Low_complexity |
| chr6 | 52929498  | 52929899  | .    | .         | .         | .         | .              | .              |
| chr6 | 56911144  | 56911545  | .    | .         | .         | .         | .              | .              |
| chr6 | 56954611  | 56955012  | .    | .         | .         | .         | .              | .              |
| chr6 | 57036728  | 57037129  | .    | .         | .         | .         | .              | .              |
| chr6 | 71276504  | 71276905  | .    | .         | .         | .         | .              | .              |
| chr6 | 74230641  | 74231042  | .    | .         | .         | .         | .              | .              |
| chr6 | 74363600  | 74364001  | .    | .         | .         | .         | .              | .              |
| chr6 | 79576997  | 79577398  | .    | .         | .         | .         | .              | .              |
| chr6 | 80340750  | 80341151  | .    | .         | .         | .         | .              | .              |
| chr6 | 83777193  | 83777594  | chr6 | 83777055  | 83777201  | MIR3      | SINE           | MIR            |
| chr6 | 84937383  | 84937784  | .    | .         | .         | .         | .              | .              |
| chr6 | 86303722  | 86304123  | .    | .         | .         | .         | .              | .              |
| chr6 | 88182299  | 88182700  | .    | .         | .         | .         | .              | .              |
| chr6 | 88299618  | 88300019  | .    | .         | .         | .         | .              | .              |
| chr6 | 88411902  | 88412303  | .    | .         | .         | .         | .              | .              |
| chr6 | 89673125  | 89673526  | chr6 | 89673460  | 89673501  | (CCCCG)n  | Simple_repeat  | Simple_repeat  |
| chr6 | 90348056  | 90348457  | .    | .         | .         | .         | .              | .              |
| chr6 | 96025466  | 96025867  | .    | .         | .         | .         | .              | .              |
| chr6 | 99873024  | 99873425  | .    | .         | .         | .         | .              | .              |
| chr6 | 105307587 | 105307988 | .    | .         | .         | .         | .              | .              |
| chr6 | 108582270 | 108582671 | .    | .         | .         | .         | .              | .              |
| chr6 | 108615890 | 108616291 | .    | .         | .         | .         | .              | .              |
| chr6 | 109416460 | 109416861 | .    | .         | .         | .         | .              | .              |
| chr6 | 110501113 | 110501514 | .    | .         | .         | .         | .              | .              |
| chr6 | 111136519 | 111136920 | chr6 | 111136526 | 111136555 | (TCC)n    | Simple_repeat  | Simple_repeat  |
| chr6 | 116989737 | 116990138 | chr6 | 116990022 | 116990256 | AluY      | SINE           | Alu            |
| chr6 | 117002192 | 117002593 | chr6 | 117002274 | 117002308 | (CCG)n    | Simple_repeat  | Simple_repeat  |
| chr6 | 135375790 | 135376191 | .    | .         | .         | .         | .              | .              |
| chr6 | 136610884 | 136611285 | .    | .         | .         | .         | .              | .              |
| chr6 | 139094409 | 139094810 | .    | .         | .         | .         | .              | .              |
| chr6 | 143771677 | 143772078 | .    | .         | .         | .         | .              | .              |
| chr6 | 144416674 | 144417075 | chr6 | 144417027 | 144417317 | AluSx3    | SINE           | Alu            |
| chr6 | 146135830 | 146136231 | chr6 | 146135926 | 146135967 | GC_rich   | Low_complexity | Low_complexity |
| chr6 | 146135830 | 146136231 | chr6 | 146136189 | 146136306 | MIR3      | SINE           | MIR            |
| chr6 | 146285229 | 146285630 | .    | .         | .         | .         | .              | .              |
| chr6 | 147523455 | 147523856 | .    | .         | .         | .         | .              | .              |
| chr6 | 150039081 | 150039482 | .    | .         | .         | .         | .              | .              |
| chr6 | 150070669 | 150071070 | chr6 | 150070876 | 150070960 | (CGG)n    | Simple_repeat  | Simple_repeat  |
| chr6 | 151773120 | 151773521 | .    | .         | .         | .         | .              | .              |
| chr6 | 157800914 | 157801315 | chr6 | 157800850 | 157801008 | MIR       | SINE           | MIR            |



|      |           |           |      |           |           |             |                |                |
|------|-----------|-----------|------|-----------|-----------|-------------|----------------|----------------|
| chr7 | 128502550 | 128502951 | chr7 | 128502513 | 128502607 | L2c         | LINE           | L2             |
| chr7 | 128502550 | 128502951 | chr7 | 128502671 | 128502713 | (TGAA)n     | Simple_repeat  | Simple_repeat  |
| chr7 | 128864390 | 128864791 | chr7 | 128864737 | 128864915 | G-rich      | Low_complexity | Low_complexity |
| chr7 | 129592699 | 129593100 | .    | .         | .         | .           | .              | .              |
| chr7 | 129691002 | 129691403 | .    | .         | .         | .           | .              | .              |
| chr7 | 129845099 | 129845500 | .    | .         | .         | .           | .              | .              |
| chr7 | 129932690 | 129933091 | .    | .         | .         | .           | .              | .              |
| chr7 | 132766858 | 132767259 | chr7 | 132767190 | 132767236 | L2c         | LINE           | L2             |
| chr7 | 132937504 | 132937905 | .    | .         | .         | .           | .              | .              |
| chr7 | 133811853 | 133812254 | chr7 | 133811893 | 133811995 | A-rich      | Low_complexity | Low_complexity |
| chr7 | 134001627 | 134002028 | .    | .         | .         | .           | .              | .              |
| chr7 | 134670959 | 134671360 | .    | .         | .         | .           | .              | .              |
| chr7 | 134855314 | 134855715 | .    | .         | .         | .           | .              | .              |
| chr7 | 135194812 | 135195213 | .    | .         | .         | .           | .              | .              |
| chr7 | 135242260 | 135242661 | .    | .         | .         | .           | .              | .              |
| chr7 | 135347040 | 135347441 | .    | .         | .         | .           | .              | .              |
| chr7 | 135661875 | 135662276 | .    | .         | .         | .           | .              | .              |
| chr7 | 139025127 | 139025528 | chr7 | 139025445 | 139025517 | tRNA-Arg-AG | tRNA           | tRNA           |
| chr7 | 140098158 | 140098559 | chr7 | 140098536 | 140098563 | (T)n        | Simple_repeat  | Simple_repeat  |
| chr7 | 140396548 | 140396949 | .    | .         | .         | .           | .              | .              |
| chr7 | 141437929 | 141438330 | .    | .         | .         | .           | .              | .              |
| chr7 | 148787690 | 148788091 | .    | .         | .         | .           | .              | .              |
| chr7 | 148823229 | 148823630 | .    | .         | .         | .           | .              | .              |
| chr7 | 148892497 | 148892898 | chr7 | 148892855 | 148892926 | GC-rich     | Low_complexity | Low_complexity |
| chr7 | 148936477 | 148936878 | .    | .         | .         | .           | .              | .              |
| chr7 | 149157506 | 149157907 | chr7 | 149157408 | 149157606 | GC-rich     | Low_complexity | Low_complexity |
| chr7 | 149194674 | 149195075 | chr7 | 149194667 | 149194709 | GC-rich     | Low_complexity | Low_complexity |
| chr7 | 149194674 | 149195075 | chr7 | 149194955 | 149194984 | (CCCCG)n    | Simple_repeat  | Simple_repeat  |
| chr7 | 149321672 | 149322073 | .    | .         | .         | .           | .              | .              |
| chr7 | 149411654 | 149412055 | chr7 | 149411763 | 149411798 | (CGGGGG)n   | Simple_repeat  | Simple_repeat  |
| chr7 | 149411654 | 149412055 | chr7 | 149411884 | 149411906 | GC-rich     | Low_complexity | Low_complexity |
| chr7 | 149411654 | 149412055 | chr7 | 149411996 | 149412055 | C-rich      | Low_complexity | Low_complexity |
| chr7 | 149535236 | 149535637 | .    | .         | .         | .           | .              | .              |
| chr7 | 150066173 | 150066574 | .    | .         | .         | .           | .              | .              |
| chr7 | 150689789 | 150690190 | .    | .         | .         | .           | .              | .              |
| chr7 | 150725571 | 150725972 | .    | .         | .         | .           | .              | .              |
| chr7 | 150754944 | 150755345 | chr7 | 150755232 | 150755255 | GC-rich     | Low_complexity | Low_complexity |
| chr7 | 150777702 | 150778103 | .    | .         | .         | .           | .              | .              |
| chr7 | 150780432 | 150780833 | chr7 | 150780608 | 150780630 | GC-rich     | Low_complexity | Low_complexity |
| chr7 | 150924204 | 150924605 | .    | .         | .         | .           | .              | .              |
| chr7 | 155437131 | 155437532 | chr7 | 155437289 | 155437328 | GC-rich     | Low_complexity | Low_complexity |
| chr7 | 155437131 | 155437532 | chr7 | 155437347 | 155437372 | GC-rich     | Low_complexity | Low_complexity |
| chr7 | 158649050 | 158649451 | .    | .         | .         | .           | .              | .              |
| chr8 | 182252    | 182653    | chr8 | 182274    | 182336    | C-rich      | Low_complexity | Low_complexity |
| chr8 | 17779998  | 17780399  | .    | .         | .         | .           | .              | .              |
| chr8 | 18067327  | 18067728  | .    | .         | .         | .           | .              | .              |
| chr8 | 19674612  | 19675013  | chr8 | 19674619  | 19674648  | (CCCCCG)n   | Simple_repeat  | Simple_repeat  |
| chr8 | 19674612  | 19675013  | chr8 | 19674949  | 19674987  | (CGG)n      | Simple_repeat  | Simple_repeat  |
| chr8 | 21775794  | 21776195  | chr8 | 21775670  | 21776110  | LTR67B      | LTR            | ERVL           |
| chr8 | 21999781  | 22000182  | .    | .         | .         | .           | .              | .              |
| chr8 | 27631687  | 27632088  | chr8 | 27631683  | 27631745  | AluSc       | SINE           | Alu            |
| chr8 | 28747612  | 28748013  | chr8 | 28748012  | 28748068  | C-rich      | Low_complexity | Low_complexity |
| chr8 | 29120557  | 29120958  | chr8 | 29120621  | 29120679  | G-rich      | Low_complexity | Low_complexity |
| chr8 | 30515622  | 30516023  | chr8 | 30515654  | 30515700  | (CGG)n      | Simple_repeat  | Simple_repeat  |
| chr8 | 30601716  | 30602117  | .    | .         | .         | .           | .              | .              |
| chr8 | 30890884  | 30891285  | chr8 | 30890845  | 30890891  | G-rich      | Low_complexity | Low_complexity |
| chr8 | 30890884  | 30891285  | chr8 | 30891178  | 30891306  | G-rich      | Low_complexity | Low_complexity |
| chr8 | 37707282  | 37707683  | .    | .         | .         | .           | .              | .              |
| chr8 | 37887757  | 37888158  | chr8 | 37888004  | 37888039  | (CGGGG)n    | Simple_repeat  | Simple_repeat  |
| chr8 | 38240328  | 38240729  | .    | .         | .         | .           | .              | .              |
| chr8 | 38326039  | 38326440  | .    | .         | .         | .           | .              | .              |
| chr8 | 42698324  | 42698725  | .    | .         | .         | .           | .              | .              |
| chr8 | 42911058  | 42911459  | chr8 | 42910804  | 42911077  | AluJb       | SINE           | Alu            |
| chr8 | 48872594  | 48872995  | .    | .         | .         | .           | .              | .              |
| chr8 | 48873160  | 48873561  | .    | .         | .         | .           | .              | .              |
| chr8 | 53626826  | 53627227  | .    | .         | .         | .           | .              | .              |
| chr8 | 56986934  | 56987335  | .    | .         | .         | .           | .              | .              |
| chr8 | 63951249  | 63951650  | .    | .         | .         | .           | .              | .              |
| chr8 | 67340933  | 67341334  | .    | .         | .         | .           | .              | .              |
| chr8 | 67525588  | 67525989  | chr8 | 67525584  | 67525717  | G-rich      | Low_complexity | Low_complexity |
| chr8 | 67579411  | 67579812  | .    | .         | .         | .           | .              | .              |
| chr8 | 67782802  | 67783203  | .    | .         | .         | .           | .              | .              |
| chr8 | 74206046  | 74206447  | .    | .         | .         | .           | .              | .              |
| chr8 | 74884496  | 74884897  | .    | .         | .         | .           | .              | .              |
| chr8 | 75262432  | 75262833  | .    | .         | .         | .           | .              | .              |
| chr8 | 80942264  | 80942665  | .    | .         | .         | .           | .              | .              |
| chr8 | 81398296  | 81398697  | chr8 | 81398222  | 81398415  | (CCCCAG)n   | Simple_repeat  | Simple_repeat  |
| chr8 | 82633352  | 82633753  | .    | .         | .         | .           | .              | .              |
| chr8 | 82754849  | 82755250  | .    | .         | .         | .           | .              | .              |
| chr8 | 92082358  | 92082759  | .    | .         | .         | .           | .              | .              |
| chr8 | 94766908  | 94767309  | chr8 | 94766846  | 94766922  | Tigger5     | DNA            | TcMar-Tigger   |
| chr8 | 95565579  | 95565980  | .    | .         | .         | .           | .              | .              |
| chr8 | 95908710  | 95909111  | .    | .         | .         | .           | .              | .              |
| chr8 | 96037041  | 96037442  | .    | .         | .         | .           | .              | .              |
| chr8 | 97247576  | 97247977  | .    | .         | .         | .           | .              | .              |
| chr8 | 99057573  | 99057974  | chr8 | 99057920  | 99058242  | AluJb       | SINE           | Alu            |
| chr8 | 99129252  | 99129653  | .    | .         | .         | .           | .              | .              |
| chr8 | 101734724 | 101735125 | .    | .         | .         | .           | .              | .              |
| chr8 | 103875446 | 103875847 | chr8 | 103875494 | 103875517 | GC-rich     | Low_complexity | Low_complexity |
| chr8 | 103875446 | 103875847 | chr8 | 103875841 | 103875875 | (CCG)n      | Simple_repeat  | Simple_repeat  |
| chr8 | 104427372 | 104427773 | .    | .         | .         | .           | .              | .              |
| chr8 | 109799685 | 109800086 | chr8 | 109799849 | 109799874 | (CGGGG)n    | Simple_repeat  | Simple_repeat  |
| chr8 | 110346185 | 110346586 | .    | .         | .         | .           | .              | .              |
| chr8 | 110552123 | 110552524 | .    | .         | .         | .           | .              | .              |
| chr8 | 117778520 | 117778921 | .    | .         | .         | .           | .              | .              |
| chr8 | 119634026 | 119634427 | chr8 | 119634401 | 119634429 | GC-rich     | Low_complexity | Low_complexity |
| chr8 | 120844783 | 120845184 | .    | .         | .         | .           | .              | .              |
| chr8 | 124053963 | 124054364 | .    | .         | .         | .           | .              | .              |
| chr8 | 124084761 | 124085162 | .    | .         | .         | .           | .              | .              |
| chr8 | 124253464 | 124253865 | .    | .         | .         | .           | .              | .              |
| chr8 | 124286332 | 124286733 | .    | .         | .         | .           | .              | .              |
| chr8 | 125551210 | 125551611 | .    | .         | .         | .           | .              | .              |
| chr8 | 130951841 | 130952242 | .    | .         | .         | .           | .              | .              |
| chr8 | 141521282 | 141521683 | .    | .         | .         | .           | .              | .              |
| chr8 | 143484458 | 143484859 | chr8 | 143484282 | 143484462 | C-rich      | Low_complexity | Low_complexity |



|      |           |           |      |           |           |          |                |                |
|------|-----------|-----------|------|-----------|-----------|----------|----------------|----------------|
| chr8 | 143808507 | 143808908 | chr8 | 143808501 | 143808522 | GC_rich  | Low_complexity | Low_complexity |
| chr8 | 143808507 | 143808908 | chr8 | 143808742 | 143808763 | GC_rich  | Low_complexity | Low_complexity |
| chr8 | 144636430 | 144636831 | chr8 | 144636508 | 144636682 | (CA)n    | Simple_repeat  | Simple_repeat  |
| chr8 | 144636430 | 144636831 | chr8 | 144636697 | 144636782 | (CA)n    | Simple_repeat  | Simple_repeat  |
| chr8 | 144636430 | 144636831 | chr8 | 144636808 | 144636972 | (CA)n    | Simple_repeat  | Simple_repeat  |
| chr8 | 144699634 | 144700035 | chr8 | 144699847 | 144699869 | GC_rich  | Low_complexity | Low_complexity |
| chr8 | 144816078 | 144816479 | chr8 | 144815978 | 144816156 | C-rich   | Low_complexity | Low_complexity |
| chr8 | 144897836 | 144898237 | chr8 | 144898044 | 144898067 | GC_rich  | Low_complexity | Low_complexity |
| chr8 | 144911402 | 144911803 | .    | .         | .         | .        | .              | .              |
| chr8 | 145023686 | 145024087 | .    | .         | .         | .        | .              | .              |
| chr8 | 145133349 | 145133750 | .    | .         | .         | .        | .              | .              |
| chr8 | 145149859 | 145150260 | chr8 | 145149871 | 145149927 | C-rich   | Low_complexity | Low_complexity |
| chr8 | 145149859 | 145150260 | chr8 | 145150040 | 145150082 | GC_rich  | Low_complexity | Low_complexity |
| chr8 | 145149859 | 145150260 | chr8 | 145150140 | 145150171 | GC_rich  | Low_complexity | Low_complexity |
| chr8 | 145159616 | 145160017 | chr8 | 145159669 | 145159759 | C-rich   | Low_complexity | Low_complexity |
| chr8 | 145550441 | 145550842 | .    | .         | .         | .        | .              | .              |
| chr8 | 145597520 | 145597921 | chr8 | 145597897 | 145598179 | Alu/b    | SINE           | Alu            |
| chr8 | 145669863 | 145670264 | chr8 | 145669825 | 145669938 | (CCGG)n  | Simple_repeat  | Simple_repeat  |
| chr8 | 145669863 | 145670264 | chr8 | 145669947 | 145669983 | GC_rich  | Low_complexity | Low_complexity |
| chr8 | 145703258 | 145703659 | chr8 | 145703266 | 145703340 | C-rich   | Low_complexity | Low_complexity |
| chr8 | 145703258 | 145703659 | chr8 | 145703618 | 145703739 | G-rich   | Low_complexity | Low_complexity |
| chr8 | 145734232 | 145734633 | .    | .         | .         | .        | .              | .              |
| chr8 | 145980800 | 145981201 | .    | .         | .         | .        | .              | .              |
| chr8 | 146017664 | 146018065 | .    | .         | .         | .        | .              | .              |
| chr8 | 146176009 | 146176410 | chr8 | 146176001 | 146176090 | C-rich   | Low_complexity | Low_complexity |
| chr9 | 4679458   | 4679859   | .    | .         | .         | .        | .              | .              |
| chr9 | 4984321   | 4984722   | chr9 | 4983831   | 4984345   | L2a      | LINE           | L2             |
| chr9 | 7799622   | 7800023   | chr9 | 7799886   | 7800008   | GC_rich  | Low_complexity | Low_complexity |
| chr9 | 14314842  | 14315243  | .    | .         | .         | .        | .              | .              |
| chr9 | 14693551  | 14693952  | chr9 | 14693756  | 14693908  | MER5A1   | DNA            | hAT-Charlie    |
| chr9 | 15422550  | 15422951  | chr9 | 15422765  | 15422802  | GC_rich  | Low_complexity | Low_complexity |
| chr9 | 19102826  | 19103227  | chr9 | 19103185  | 19103298  | MIRc     | SINE           | MIR            |
| chr9 | 19102826  | 19103227  | chr9 | 19103220  | 19103377  | L2       | LINE           | L2             |
| chr9 | 19379880  | 19380281  | .    | .         | .         | .        | .              | .              |
| chr9 | 21335091  | 21335492  | .    | .         | .         | .        | .              | .              |
| chr9 | 25677436  | 25677837  | .    | .         | .         | .        | .              | .              |
| chr9 | 26947280  | 26947681  | .    | .         | .         | .        | .              | .              |
| chr9 | 32572972  | 32573373  | .    | .         | .         | .        | .              | .              |
| chr9 | 33024909  | 33025310  | .    | .         | .         | .        | .              | .              |
| chr9 | 33290689  | 33291090  | .    | .         | .         | .        | .              | .              |
| chr9 | 34376998  | 34377399  | .    | .         | .         | .        | .              | .              |
| chr9 | 34637820  | 34638221  | chr9 | 34637988  | 34638401  | L2c      | LINE           | L2             |
| chr9 | 34988990  | 34989391  | .    | .         | .         | .        | .              | .              |
| chr9 | 35079835  | 35080236  | .    | .         | .         | .        | .              | .              |
| chr9 | 35096153  | 35096554  | .    | .         | .         | .        | .              | .              |
| chr9 | 35102924  | 35103325  | .    | .         | .         | .        | .              | .              |
| chr9 | 35116398  | 35116799  | .    | .         | .         | .        | .              | .              |
| chr9 | 35161948  | 35162349  | .    | .         | .         | .        | .              | .              |
| chr9 | 35488925  | 35489326  | chr9 | 35488380  | 35488987  | MER5A1   | LTR            | ERV1           |
| chr9 | 35488925  | 35489326  | chr9 | 35488987  | 35489065  | MER50B   | LTR            | ERV1           |
| chr9 | 35488925  | 35489326  | chr9 | 35489065  | 35489412  | THE1D    | LTR            | ERV1-MaLR      |
| chr9 | 35732344  | 35732745  | .    | .         | .         | .        | .              | .              |
| chr9 | 35748950  | 35749351  | chr9 | 35749308  | 35749332  | (CCG)n   | Simple_repeat  | Simple_repeat  |
| chr9 | 37079430  | 37079831  | .    | .         | .         | .        | .              | .              |
| chr9 | 37120015  | 37120416  | .    | .         | .         | .        | .              | .              |
| chr9 | 37485570  | 37485971  | chr9 | 37485572  | 37485712  | MER115   | DNA            | hAT-Tip100     |
| chr9 | 37576211  | 37576612  | chr9 | 37576483  | 37576715  | L3       | LINE           | CR1            |
| chr9 | 37753556  | 37753957  | .    | .         | .         | .        | .              | .              |
| chr9 | 37800496  | 37800897  | .    | .         | .         | .        | .              | .              |
| chr9 | 37903815  | 37904216  | .    | .         | .         | .        | .              | .              |
| chr9 | 40791993  | 40792394  | chr9 | 40792302  | 40792584  | L1MC5    | LINE           | L1             |
| chr9 | 72374814  | 72375215  | chr9 | 72374929  | 72374950  | GC_rich  | Low_complexity | Low_complexity |
| chr9 | 72374814  | 72375215  | chr9 | 72374961  | 72374992  | GC_rich  | Low_complexity | Low_complexity |
| chr9 | 72435384  | 72435785  | chr9 | 72435348  | 72435389  | (CA)n    | Simple_repeat  | Simple_repeat  |
| chr9 | 74526312  | 74526713  | .    | .         | .         | .        | .              | .              |
| chr9 | 82186536  | 82186937  | .    | .         | .         | .        | .              | .              |
| chr9 | 86322725  | 86323126  | .    | .         | .         | .        | .              | .              |
| chr9 | 86571555  | 86571956  | .    | .         | .         | .        | .              | .              |
| chr9 | 88555637  | 88556038  | .    | .         | .         | .        | .              | .              |
| chr9 | 88896856  | 88897257  | .    | .         | .         | .        | .              | .              |
| chr9 | 95432390  | 95432791  | chr9 | 95432674  | 95432794  | MIRc     | SINE           | MIR            |
| chr9 | 95527120  | 95527521  | chr9 | 95527122  | 95527181  | GC_rich  | Low_complexity | Low_complexity |
| chr9 | 95527120  | 95527521  | chr9 | 95527226  | 95527251  | GC_rich  | Low_complexity | Low_complexity |
| chr9 | 97021349  | 97021750  | chr9 | 97021330  | 97021352  | AT_rich  | Low_complexity | Low_complexity |
| chr9 | 98079778  | 98080179  | .    | .         | .         | .        | .              | .              |
| chr9 | 99540202  | 99540603  | .    | .         | .         | .        | .              | .              |
| chr9 | 99616656  | 99617057  | .    | .         | .         | .        | .              | .              |
| chr9 | 100000457 | 100000858 | .    | .         | .         | .        | .              | .              |
| chr9 | 100395493 | 100395894 | .    | .         | .         | .        | .              | .              |
| chr9 | 102861187 | 102861588 | chr9 | 102861159 | 102861205 | (GGCTG)n | Simple_repeat  | Simple_repeat  |
| chr9 | 104160841 | 104161242 | .    | .         | .         | .        | .              | .              |
| chr9 | 111882109 | 111882510 | chr9 | 111882106 | 111882145 | GC_rich  | Low_complexity | Low_complexity |
| chr9 | 114244925 | 114245326 | chr9 | 114245096 | 114245119 | GC_rich  | Low_complexity | Low_complexity |
| chr9 | 114361539 | 114361940 | .    | .         | .         | .        | .              | .              |
| chr9 | 115480222 | 115480623 | chr9 | 115480562 | 115480634 | (CGGG)n  | Simple_repeat  | Simple_repeat  |
| chr9 | 115774314 | 115774715 | .    | .         | .         | .        | .              | .              |
| chr9 | 115818883 | 115819284 | .    | .         | .         | .        | .              | .              |
| chr9 | 115912987 | 115913388 | chr9 | 115913262 | 115913284 | (CGG)n   | Simple_repeat  | Simple_repeat  |
| chr9 | 115983378 | 115983779 | .    | .         | .         | .        | .              | .              |
| chr9 | 116037616 | 116038017 | .    | .         | .         | .        | .              | .              |
| chr9 | 116172726 | 116173127 | .    | .         | .         | .        | .              | .              |
| chr9 | 123342353 | 123342754 | .    | .         | .         | .        | .              | .              |
| chr9 | 123555230 | 123555631 | .    | .         | .         | .        | .              | .              |
| chr9 | 123964210 | 123964611 | chr9 | 123964512 | 123964580 | MIRb     | SINE           | MIR            |
| chr9 | 124855498 | 124855899 | chr9 | 124855455 | 124855526 | (CCG)n   | Simple_repeat  | Simple_repeat  |
| chr9 | 125667636 | 125668037 | .    | .         | .         | .        | .              | .              |
| chr9 | 125675398 | 125675799 | chr9 | 125675462 | 125675488 | (TCC)n   | Simple_repeat  | Simple_repeat  |
| chr9 | 125675398 | 125675799 | chr9 | 125675791 | 125676085 | AluSq2   | SINE           | Alu            |
| chr9 | 125693655 | 125694056 | .    | .         | .         | .        | .              | .              |
| chr9 | 126692285 | 126692686 | chr9 | 126692383 | 126692474 | (CCG)n   | Simple_repeat  | Simple_repeat  |
| chr9 | 126692285 | 126692686 | chr9 | 126692504 | 126692542 | GC_rich  | Low_complexity | Low_complexity |
| chr9 | 127177503 | 127177904 | .    | .         | .         | .        | .              | .              |
| chr9 | 127624055 | 127624456 | .    | .         | .         | .        | .              | .              |
| chr9 | 127703206 | 127703607 | .    | .         | .         | .        | .              | .              |
| chr9 | 127952065 | 127952466 | chr9 | 127952014 | 127952067 | (CGG)n   | Simple_repeat  | Simple_repeat  |

|      |           |           |      |           |           |          |                |                |   |
|------|-----------|-----------|------|-----------|-----------|----------|----------------|----------------|---|
| chr9 | 128003688 | 128004089 | .    | .         | .         | .        | .              | .              | . |
| chr9 | 128023844 | 128024245 | chr9 | 128024119 | 128024178 | (CGG)n   | Simple_repeat  | Simple_repeat  | . |
| chr9 | 128469298 | 128469699 | .    | .         | .         | .        | .              | .              | . |
| chr9 | 128508316 | 128508717 | .    | .         | .         | .        | .              | .              | . |
| chr9 | 129089572 | 129089973 | .    | .         | .         | .        | .              | .              | . |
| chr9 | 129567106 | 129567507 | .    | .         | .         | .        | .              | .              | . |
| chr9 | 129622510 | 129622911 | chr9 | 129622879 | 129623092 | G-rich   | Low_complexity | Low_complexity | . |
| chr9 | 130186198 | 130186599 | .    | .         | .         | .        | .              | .              | . |
| chr9 | 130213603 | 130214004 | .    | .         | .         | .        | .              | .              | . |
| chr9 | 130341109 | 130341510 | chr9 | 130341026 | 130341157 | FRAM     | SINE           | Alu            | . |
| chr9 | 130497400 | 130497801 | .    | .         | .         | .        | .              | .              | . |
| chr9 | 130548033 | 130548434 | chr9 | 130548157 | 130548200 | (CGG)n   | Simple_repeat  | Simple_repeat  | . |
| chr9 | 130548033 | 130548434 | chr9 | 130548256 | 130548432 | (CGG)n   | Simple_repeat  | Simple_repeat  | . |
| chr9 | 130565170 | 130565571 | .    | .         | .         | .        | .              | .              | . |
| chr9 | 130639854 | 130640255 | chr9 | 130640024 | 130640054 | (GGGA)n  | Simple_repeat  | Simple_repeat  | . |
| chr9 | 130639854 | 130640255 | chr9 | 130640163 | 130640346 | MIRc     | SINE           | MIR            | . |
| chr9 | 130699988 | 130700389 | .    | .         | .         | .        | .              | .              | . |
| chr9 | 130828596 | 130828997 | chr9 | 130828494 | 130828752 | L2b      | LINE           | L2             | . |
| chr9 | 130890055 | 130890456 | .    | .         | .         | .        | .              | .              | . |
| chr9 | 130965341 | 130965742 | chr9 | 130965318 | 130965411 | L2       | LINE           | L2             | . |
| chr9 | 130965341 | 130965742 | chr9 | 130965632 | 130965653 | GC_rich  | Low_complexity | Low_complexity | . |
| chr9 | 131038059 | 131038460 | .    | .         | .         | .        | .              | .              | . |
| chr9 | 131084635 | 131085036 | .    | .         | .         | .        | .              | .              | . |
| chr9 | 131102530 | 131102931 | chr9 | 131102742 | 131102763 | GC_rich  | Low_complexity | Low_complexity | . |
| chr9 | 131102530 | 131102931 | chr9 | 131102900 | 131102988 | (CGGGG)n | Simple_repeat  | Simple_repeat  | . |
| chr9 | 131266909 | 131267310 | .    | .         | .         | .        | .              | .              | . |
| chr9 | 131418891 | 131419292 | chr9 | 131418893 | 131418923 | GC_rich  | Low_complexity | Low_complexity | . |
| chr9 | 131446789 | 131447190 | chr9 | 131446958 | 131447189 | L2b      | LINE           | L2             | . |
| chr9 | 131466373 | 131466774 | chr9 | 131466773 | 131466919 | MIR      | SINE           | MIR            | . |
| chr9 | 131534235 | 131534636 | .    | .         | .         | .        | .              | .              | . |
| chr9 | 131789448 | 131789849 | chr9 | 131789389 | 131789479 | MIRb     | SINE           | MIR            | . |
| chr9 | 131789448 | 131789849 | chr9 | 131789493 | 131789700 | MIRb     | SINE           | MIR            | . |
| chr9 | 132586260 | 132586661 | chr9 | 132586596 | 132586874 | Alu5x1   | SINE           | Alu            | . |
| chr9 | 132815936 | 132816337 | .    | .         | .         | .        | .              | .              | . |
| chr9 | 133587900 | 133588301 | .    | .         | .         | .        | .              | .              | . |
| chr9 | 134000788 | 134001189 | .    | .         | .         | .        | .              | .              | . |
| chr9 | 134153446 | 134153847 | chr9 | 134153429 | 134153449 | (CGG)n   | Simple_repeat  | Simple_repeat  | . |
| chr9 | 134164851 | 134165252 | .    | .         | .         | .        | .              | .              | . |
| chr9 | 134406478 | 134406879 | chr9 | 134406701 | 134406722 | GC_rich  | Low_complexity | Low_complexity | . |
| chr9 | 134955118 | 134955519 | .    | .         | .         | .        | .              | .              | . |
| chr9 | 135282051 | 135282452 | .    | .         | .         | .        | .              | .              | . |
| chr9 | 135545267 | 135545668 | .    | .         | .         | .        | .              | .              | . |
| chr9 | 136214909 | 136215310 | .    | .         | .         | .        | .              | .              | . |
| chr9 | 136283039 | 136283440 | .    | .         | .         | .        | .              | .              | . |
| chr9 | 136324936 | 136325337 | .    | .         | .         | .        | .              | .              | . |
| chr9 | 136932989 | 136933390 | chr9 | 136932965 | 136933043 | GC_rich  | Low_complexity | Low_complexity | . |
| chr9 | 136932989 | 136933390 | chr9 | 136933080 | 136933115 | GC_rich  | Low_complexity | Low_complexity | . |
| chr9 | 136932989 | 136933390 | chr9 | 136933210 | 136933386 | GC_rich  | Low_complexity | Low_complexity | . |
| chr9 | 137029840 | 137030241 | .    | .         | .         | .        | .              | .              | . |
| chr9 | 138853120 | 138853521 | chr9 | 138853116 | 138853230 | (CCG)n   | Simple_repeat  | Simple_repeat  | . |
| chr9 | 138853120 | 138853521 | chr9 | 138853448 | 138853682 | MER33    | DNA            | hAT-Charlie    | . |
| chr9 | 138985988 | 138986389 | .    | .         | .         | .        | .              | .              | . |
| chr9 | 139258055 | 139258456 | chr9 | 139258191 | 139258213 | GC_rich  | Low_complexity | Low_complexity | . |
| chr9 | 139294525 | 139294926 | chr9 | 139294823 | 139294943 | MIRb     | SINE           | MIR            | . |
| chr9 | 140117857 | 140118258 | .    | .         | .         | .        | .              | .              | . |
| chr9 | 140149536 | 140149937 | chr9 | 140149744 | 140149881 | (CGGGG)n | Simple_repeat  | Simple_repeat  | . |
| chr9 | 140473151 | 140473552 | chr9 | 140473294 | 140473324 | GC_rich  | Low_complexity | Low_complexity | . |
| chr9 | 140512909 | 140513310 | .    | .         | .         | .        | .              | .              | . |
| chrX | 7895560   | 7895961   | chrX | 7895917   | 7896054   | MIRc     | SINE           | MIR            | . |
| chrX | 11128111  | 11128512  | chrX | 11128416  | 11128718  | LTR16A   | LTR            | ERVL           | . |
| chrX | 11777402  | 11777803  | .    | .         | .         | .        | .              | .              | . |
| chrX | 14890954  | 14891355  | .    | .         | .         | .        | .              | .              | . |
| chrX | 16804128  | 16804529  | .    | .         | .         | .        | .              | .              | . |
| chrX | 39957606  | 39958007  | chrX | 39957675  | 39957741  | (CGG)n   | Simple_repeat  | Simple_repeat  | . |
| chrX | 46404702  | 46405103  | .    | .         | .         | .        | .              | .              | . |
| chrX | 47049891  | 47050292  | chrX | 47049887  | 47049919  | MIRc     | SINE           | MIR            | . |
| chrX | 47078406  | 47078807  | chrX | 47078435  | 47078477  | GC_rich  | Low_complexity | Low_complexity | . |
| chrX | 48334260  | 48334661  | .    | .         | .         | .        | .              | .              | . |
| chrX | 48432462  | 48432863  | .    | .         | .         | .        | .              | .              | . |
| chrX | 48554738  | 48555139  | chrX | 48554929  | 48554965  | (CCG)n   | Simple_repeat  | Simple_repeat  | . |
| chrX | 48814638  | 48815039  | chrX | 48814663  | 48814750  | (CCG)n   | Simple_repeat  | Simple_repeat  | . |
| chrX | 48814638  | 48815039  | chrX | 48814738  | 48814809  | (CGG)n   | Simple_repeat  | Simple_repeat  | . |
| chrX | 48814638  | 48815039  | chrX | 48814977  | 48815021  | (CGG)n   | Simple_repeat  | Simple_repeat  | . |
| chrX | 48931522  | 48931923  | .    | .         | .         | .        | .              | .              | . |
| chrX | 48979974  | 48980375  | chrX | 48980282  | 48980591  | Alu5c8   | SINE           | Alu            | . |
| chrX | 49091707  | 49092108  | .    | .         | .         | .        | .              | .              | . |
| chrX | 53024507  | 53024908  | .    | .         | .         | .        | .              | .              | . |
| chrX | 53077580  | 53077981  | chrX | 53077548  | 53077582  | (CCCCG)n | Simple_repeat  | Simple_repeat  | . |
| chrX | 53077580  | 53077981  | chrX | 53077626  | 53077665  | (TCCC)n  | Simple_repeat  | Simple_repeat  | . |
| chrX | 53449412  | 53449813  | .    | .         | .         | .        | .              | .              | . |
| chrX | 54208725  | 54209126  | chrX | 54208783  | 54208874  | (TAGG)n  | Simple_repeat  | Simple_repeat  | . |
| chrX | 54209918  | 54210319  | chrX | 54210023  | 54210052  | (CGGGG)n | Simple_repeat  | Simple_repeat  | . |
| chrX | 57312977  | 57313378  | chrX | 57312798  | 57312994  | MIRb     | SINE           | MIR            | . |
| chrX | 64196193  | 64196594  | .    | .         | .         | .        | .              | .              | . |
| chrX | 64754585  | 64754986  | .    | .         | .         | .        | .              | .              | . |
| chrX | 67653510  | 67653911  | .    | .         | .         | .        | .              | .              | . |
| chrX | 67718622  | 67719023  | .    | .         | .         | .        | .              | .              | . |
| chrX | 70315422  | 70315823  | .    | .         | .         | .        | .              | .              | . |
| chrX | 71792697  | 71793098  | chrX | 71793074  | 71793094  | (A)n     | Simple_repeat  | Simple_repeat  | . |
| chrX | 74375890  | 74376291  | .    | .         | .         | .        | .              | .              | . |
| chrX | 77154668  | 77155069  | .    | .         | .         | .        | .              | .              | . |
| chrX | 85302423  | 85302824  | .    | .         | .         | .        | .              | .              | . |
| chrX | 100645733 | 100646134 | .    | .         | .         | .        | .              | .              | . |
| chrX | 102884404 | 102884805 | .    | .         | .         | .        | .              | .              | . |
| chrX | 102942850 | 102943251 | .    | .         | .         | .        | .              | .              | . |
| chrX | 106045619 | 106046020 | .    | .         | .         | .        | .              | .              | . |
| chrX | 106361839 | 106362240 | .    | .         | .         | .        | .              | .              | . |
| chrX | 107334744 | 107335145 | .    | .         | .         | .        | .              | .              | . |
| chrX | 118987004 | 118987405 | .    | .         | .         | .        | .              | .              | . |
| chrX | 119005608 | 119006009 | chrX | 119005768 | 119005796 | GC_rich  | Low_complexity | Low_complexity | . |
| chrX | 119763493 | 119763894 | .    | .         | .         | .        | .              | .              | . |
| chrX | 122866768 | 122867169 | .    | .         | .         | .        | .              | .              | . |
| chrX | 129402676 | 129403077 | chrX | 129402773 | 129402808 | (GGA)n   | Simple_repeat  | Simple_repeat  | . |
| chrX | 130037126 | 130037527 | .    | .         | .         | .        | .              | .              | . |
| chrX | 134478472 | 134478873 | chrX | 134478868 | 134478889 | GC_rich  | Low_complexity | Low_complexity | . |

|      |           |           |      |           |           |         |                |                |
|------|-----------|-----------|------|-----------|-----------|---------|----------------|----------------|
| chrX | 135055818 | 135056219 | chrX | 135056164 | 135056353 | G-rich  | Low_complexity | Low_complexity |
| chrX | 148622341 | 148622742 | .    | .         | .         | .       | .              | .              |
| chrX | 149106474 | 149106875 | chrX | 149106697 | 149106847 | (CACG)n | Simple_repeat  | Simple_repeat  |
| chrX | 149736632 | 149737033 | .    | .         | .         | .       | .              | .              |
| chrX | 152110026 | 152110427 | .    | .         | .         | .       | .              | .              |
| chrX | 153775558 | 153775959 | .    | .         | .         | .       | .              | .              |



chr1 205414449 205414450 . . . . .

chr1 207097649 207097650 chr1 207097184 207097924 (TG)n Simple\_repe:Simple\_repeat

chr1 210536672 210536673 . . . . .

chr1 210547813 210547814 . . . . .

chr1 210827361 210827362 . . . . .

chr1 212376159 212376160 . . . . .

chr1 226891302 226891303 . . . . .

chr1 227002971 227002972 . . . . .

chr1 234812137 234812138 chr1 234811720 234812316 L1ME3A LINE L1

chr1 235099141 235099142 . . . . .

chr1 247611476 247611477 . . . . .

chr10 3598606 3598607 . . . . .

chr10 6205808 6205809 . . . . .

chr10 6317397 6317398 . . . . .

chr10 18452852 18452853 . . . . .

chr10 25349167 25349168 . . . . .

chr10 38774500 38774501 chr10 38774489 38774537 (GAATG)n Satellite Satellite

chr10 38776497 38776498 chr10 38776268 38776627 (GAATG)n Satellite Satellite

chr10 38817716 38817717 chr10 38817677 38818632 (GAATG)n Satellite Satellite

chr10 38872161 38872162 chr10 38871825 38872621 (GAATG)n Satellite Satellite

chr10 38881800 38881801 chr10 38881691 38882189 HSATII Satellite Satellite

chr10 39094333 39094334 chr10 39094326 39094504 (CATTG)n Satellite Satellite

chr10 39111272 39111273 chr10 39111231 39111404 (CATTG)n Satellite Satellite

chr10 39138171 39138172 chr10 39138046 39138469 (GAATG)n Satellite Satellite

chr10 42531937 42531938 chr10 42527021 42546685 ALR/Alpha Satellite centr

chr10 42532571 42532572 chr10 42527021 42546685 ALR/Alpha Satellite centr

chr10 42542185 42542186 chr10 42527021 42546685 ALR/Alpha Satellite centr

chr10 42599982 42599983 chr10 42598546 42601361 HSATII Satellite Satellite

chr10 42797315 42797316 chr10 42797274 42797445 (CATTG)n Satellite Satellite

chr10 42800158 42800159 chr10 42799444 42800323 (CATTG)n Satellite Satellite

chr10 42817731 42817732 chr10 42817135 42818362 ALR/Alpha Satellite centr

chr10 43950921 43950922 . . . . .

chr10 47058659 47058660 chr10 47058582 47058924 (CA)n Simple\_repe:Simple\_repeat

chr10 52852335 52852336 . . . . .

chr10 69609230 69609231 . . . . .

chr10 71754252 71754253 chr10 71754203 71754300 MLTIJ LTR ERVL-MaLR

chr10 72288765 72288766 chr10 72288492 72288873 MLTIJ LTR ERVL-MaLR

chr10 73083386 73083387 chr10 73083027 73083494 MLTIJ LTR ERVL-MaLR

chr10 73137256 73137257 . . . . .

chr10 73620304 73620305 . . . . .

chr10 73736070 73736071 . . . . .

chr10 74095324 74095325 . . . . .

chr10 75608937 75608938 . . . . .

chr10 77716624 77716625 chr10 77716380 77716661 MLTIJ LTR ERVL-MaLR

chr10 79706050 79706051 chr10 79705708 79706156 MLTIJ LTR ERVL-MaLR

chr10 90145422 90145423 . . . . .

chr10 94561952 94561953 chr10 94561857 94562339 MLTIJ LTR ERVL-MaLR

chr10 95226250 95226251 . . . . .

chr10 95511780 95511781 . . . . .

chr10 98561469 98561470 chr10 98561361 98561539 GA-rich Low\_comple:Low\_complexity

chr10 99486598 99486599 chr10 99486255 99486610 MLTIJ LTR ERVL-MaLR

chr10 105344802 105344803 . . . . .

chr10 114602987 114602988 chr10 114602587 114603055 LTR33B LTR ERVL

chr10 116571840 116571841 chr10 116571334 116571976 MLT2F LTR ERVL

chr10 118947040 118947041 chr10 118946916 118947196 MLTIJ LTR ERVL-MaLR

chr10 123185965 123185966 chr10 123185882 123186488 LTR67B LTR ERVL

chr10 125705220 125705221 chr10 125705164 125705285 MLTIJ LTR ERVL-MaLR

chr10 126973705 126973706 chr10 126973365 126973794 MLTIJ LTR ERVL-MaLR

chr10 127888063 127888064 . . . . .

chr10 132505897 132505898 . . . . .

chr10 134177915 134177916 chr10 134177891 134178071 C-rich Low\_comple:Low\_complexity

chr10 135500715 135500716 chr10 135500000 135502705 BSR/Beta Satellite Satellite

chr11 919256 919257 chr11 919227 919368 MLTIJ LTR ERVL-MaLR

chr11 3611613 3611614 chr11 3611582 3611963 MLTIJ LTR ERVL-MaLR

chr11 8051851 8051852 . . . . .

chr11 8710555 8710556 . . . . .

chr11 11005975 11005976 chr11 11005957 11006276 MLTIJ LTR ERVL-MaLR

chr11 17725776 17725777 chr11 17725601 17725807 MLTIJ LTR ERVL-MaLR

chr11 27256142 27256143 . . . . .

chr11 28131829 28131830 . . . . .

chr11 33423702 33423703 chr11 33423586 33424074 L2 LINE L2

chr11 33529738 33529739 chr11 33529672 33529834 LTR67B LTR ERVL

chr11 36355730 36355731 chr11 36355474 36355842 MLTIJ LTR ERVL-MaLR

chr11 43665752 43665753 . . . . .

chr11 44394763 44394764 chr11 44394547 44394885 MLTIJ LTR ERVL-MaLR

chr11 45668303 45668304 chr11 45668254 45668606 MLTIJ LTR ERVL-MaLR

chr11 45823442 45823443 chr11 45823376 45823535 MLTIJ LTR ERVL-MaLR

chr11 46134725 46134726 . . . . .

chr11 47879597 47879598 . . . . .

chr11 47976976 47976977 chr11 47976677 47977067 MLTIJ LTR ERVL-MaLR

chr11 48172367 48172368 . . . . .

chr11 48893066 48893067 chr11 48886840 48900993 ALR/Alpha Satellite centr

chr11 51567315 51567316 chr11 51567242 51594205 ALR/Alpha Satellite centr

chr11 51573371 51573372 chr11 51567242 51594205 ALR/Alpha Satellite centr

chr11 51575698 51575699 chr11 51567242 51594205 ALR/Alpha Satellite centr

chr11 51580965 51580966 chr11 51567242 51594205 ALR/Alpha Satellite centr

chr11 51591332 51591333 chr11 51567242 51594205 ALR/Alpha Satellite centr

chr11 54890851 54890852 chr11 54889181 54893528 ALR/Alpha Satellite centr

chr11 55026423 55026424 chr11 55020818 55027630 ALR/Alpha Satellite centr

chr11 61266516 61266517 chr11 61266182 61266558 MLTIJ LTR ERVL-MaLR

chr11 61661558 61661559 chr11 61661280 61661561 Alub SINE Alu

chr11 64027110 64027111 . . . . .

chr11 64038438 64038439 . . . . .

chr11 64212443 64212444 chr11 64212396 64212756 MLTIJ LTR ERVL-MaLR

chr11 64377054 64377055 . . . . .

chr11 64387430 64387431 . . . . .

chr11 64456104 64456105 . . . . .

chr11 64609643 64609644 . . . . .

chr11 65186219 65186220 . . . . .

chr11 65244996 65244997 . . . . .

chr11 65319270 65319271 . . . . .

chr11 65635718 65635719 . . . . .

chr11 65660950 65660951 . . . . .

chr11 66649636 66649637 . . . . .

chr11 66799380 66799381 . . . . .

chr11 67007548 67007549 . . . . .

chr11 67593726 67593727 . . . . .

|               |   |
|---------------|---|
| MER21B        | 1 |
| L1MB8         | 1 |
| LTR40b        | 1 |
| MLT1A-int     | 1 |
| L1MC4         | 1 |
| MER74B        | 1 |
| L1M3a         | 1 |
| (CATG)n       | 1 |
| MER77         | 1 |
| MLT1A1        | 1 |
| LTR16D        | 1 |
| LTR16E1       | 1 |
| MLT1H2        | 1 |
| L1M3e         | 1 |
| LTR86B1       | 1 |
| L1MCc         | 1 |
| L1P3          | 1 |
| MLT1A0-int    | 1 |
| MER103C       | 1 |
| L1MA5         | 1 |
| LTR16B1       | 1 |
| MST-int       | 1 |
| LTR56         | 1 |
| FLAM_C        | 1 |
| AluS6         | 1 |
| L1P8A         | 1 |
| L1P10         | 1 |
| HERV-int      | 1 |
| MER50         | 1 |
| Harlequin-int | 1 |
| L1M2a1        | 1 |
| L1MA2         | 1 |
| L1MA7         | 1 |
| LTR57-int     | 1 |
| LOR1b         | 1 |
| MLT1A1-int    | 1 |
| LTR35A        | 1 |
| MLT1H1        | 1 |
| THE1A-int     | 1 |
| L1P6          | 1 |
| THE1D-int     | 1 |
| MER51A        | 1 |
| THE1C-int     | 1 |
| MER5A1        | 1 |
| LTR12D        | 1 |
| L1M3c         | 1 |
| MER57D        | 1 |
| LTR16C        | 1 |
| AmnSINE1      | 1 |
| L1MA5A        | 1 |
| L1P11         | 1 |
| FordPrefect_a | 1 |
| MER61D        | 1 |
| MER48         | 1 |
| LTR53         | 1 |
| LTR16D2       | 1 |
| MLT1A0        | 1 |
| (TGGG)n       | 1 |
| LTR78B        | 1 |
| THE1C         | 1 |
| (TTGGGG)n     | 1 |
| LTR41         | 1 |
| LTR86B2       | 1 |
| CER           | 1 |
| (CAGG)n       | 1 |
| (TC)n         | 1 |
| L1MD          | 1 |





|       |          |          |       |          |          |                |                           |           |
|-------|----------|----------|-------|----------|----------|----------------|---------------------------|-----------|
| chr16 | 86986561 | 86986562 | chr16 | 86986494 | 86986924 | LTR33A         | LTR                       | ERVL      |
| chr16 | 87009143 | 87009144 | chr16 | 87009026 | 87009535 | MLT1J          | LTR                       | ERVL-MaLR |
| chr16 | 87691449 | 87691450 | chr16 | 87691352 | 87691561 | MLT1J          | LTR                       | ERVL-MaLR |
| chr16 | 88367176 | 88367177 | .     | .        | .        | .              | .                         | .         |
| chr16 | 89572075 | 89572076 | .     | .        | .        | .              | .                         | .         |
| chr16 | 90025215 | 90025216 | .     | .        | .        | .              | .                         | .         |
| chr17 | 1371318  | 1371319  | .     | .        | .        | .              | .                         | .         |
| chr17 | 1572933  | 1572934  | chr17 | 1572698  | 1573773  | L2             | LINE                      | L2        |
| chr17 | 4923092  | 4923093  | .     | .        | .        | .              | .                         | .         |
| chr17 | 5015204  | 5015205  | .     | .        | .        | .              | .                         | .         |
| chr17 | 6231838  | 6231839  | chr17 | 6231525  | 6231922  | MLT1J          | LTR                       | ERVL-MaLR |
| chr17 | 6374139  | 6374140  | .     | .        | .        | .              | .                         | .         |
| chr17 | 6411304  | 6411305  | chr17 | 6411267  | 6411399  | (CTGGGG)n      | Simple_repe:Simple_repeat |           |
| chr17 | 7095000  | 7095001  | .     | .        | .        | .              | .                         | .         |
| chr17 | 7118437  | 7118438  | .     | .        | .        | .              | .                         | .         |
| chr17 | 7358879  | 7358880  | .     | .        | .        | .              | .                         | .         |
| chr17 | 7738755  | 7738756  | .     | .        | .        | .              | .                         | .         |
| chr17 | 8076997  | 8076998  | .     | .        | .        | .              | .                         | .         |
| chr17 | 8750155  | 8750156  | chr17 | 8750073  | 8750260  | MLT1J1         | LTR                       | ERVL-MaLR |
| chr17 | 12280122 | 12280123 | chr17 | 12280057 | 12280151 | MLT1J1         | LTR                       | ERVL-MaLR |
| chr17 | 12530688 | 12530689 | .     | .        | .        | .              | .                         | .         |
| chr17 | 15401663 | 15401664 | chr17 | 15401346 | 15401753 | MLT1J2         | LTR                       | ERVL-MaLR |
| chr17 | 16439126 | 16439127 | .     | .        | .        | .              | .                         | .         |
| chr17 | 17319611 | 17319612 | chr17 | 17319253 | 17319718 | MLT1J          | LTR                       | ERVL-MaLR |
| chr17 | 17512633 | 17512634 | chr17 | 17512580 | 17512960 | MLT1J2         | LTR                       | ERVL-MaLR |
| chr17 | 17598171 | 17598172 | .     | .        | .        | .              | .                         | .         |
| chr17 | 17653464 | 17653465 | chr17 | 17653396 | 17653528 | MLT1J2         | LTR                       | ERVL-MaLR |
| chr17 | 17743726 | 17743727 | .     | .        | .        | .              | .                         | .         |
| chr17 | 17753482 | 17753483 | .     | .        | .        | .              | .                         | .         |
| chr17 | 17936919 | 17936920 | .     | .        | .        | .              | .                         | .         |
| chr17 | 18601306 | 18601307 | .     | .        | .        | .              | .                         | .         |
| chr17 | 19912594 | 19912595 | .     | .        | .        | .              | .                         | .         |
| chr17 | 21002430 | 21002431 | .     | .        | .        | .              | .                         | .         |
| chr17 | 21226481 | 21226482 | chr17 | 21226436 | 21226514 | MLT1J          | LTR                       | ERVL-MaLR |
| chr17 | 22253223 | 22253224 | chr17 | 22241551 | 22263006 | ALR/Alpha      | Satellite                 | centr     |
| chr17 | 22260080 | 22260081 | chr17 | 22241551 | 22263006 | ALR/Alpha      | Satellite                 | centr     |
| chr17 | 22261583 | 22261584 | chr17 | 22241551 | 22263006 | ALR/Alpha      | Satellite                 | centr     |
| chr17 | 25265149 | 25265150 | chr17 | 25265028 | 25265260 | (GAATG)n       | Satellite                 | Satellite |
| chr17 | 25574584 | 25574585 | .     | .        | .        | .              | .                         | .         |
| chr17 | 25783411 | 25783412 | .     | .        | .        | .              | .                         | .         |
| chr17 | 26543776 | 26543777 | chr17 | 26543633 | 26543894 | MLT1J          | LTR                       | ERVL-MaLR |
| chr17 | 27139815 | 27139816 | .     | .        | .        | .              | .                         | .         |
| chr17 | 27482789 | 27482790 | .     | .        | .        | .              | .                         | .         |
| chr17 | 28927301 | 28927302 | .     | .        | .        | .              | .                         | .         |
| chr17 | 29058408 | 29058409 | .     | .        | .        | .              | .                         | .         |
| chr17 | 31149685 | 31149686 | chr17 | 31149606 | 31149693 | GC_rich        | Low_comple:Low_complexity |           |
| chr17 | 32013391 | 32013392 | .     | .        | .        | .              | .                         | .         |
| chr17 | 33478160 | 33478161 | chr17 | 33478114 | 33478275 | LSU-rRNA_HrRNA | rRNA                      | rRNA      |
| chr17 | 34114329 | 34114330 | .     | .        | .        | .              | .                         | .         |
| chr17 | 36607700 | 36607701 | .     | .        | .        | .              | .                         | .         |
| chr17 | 37029122 | 37029123 | .     | .        | .        | .              | .                         | .         |
| chr17 | 37379455 | 37379456 | .     | .        | .        | .              | .                         | .         |
| chr17 | 37769379 | 37769380 | .     | .        | .        | .              | .                         | .         |
| chr17 | 38269661 | 38269662 | .     | .        | .        | .              | .                         | .         |
| chr17 | 38527749 | 38527750 | chr17 | 38527662 | 38527794 | MLT1J1         | LTR                       | ERVL-MaLR |
| chr17 | 39808065 | 39808066 | .     | .        | .        | .              | .                         | .         |
| chr17 | 40559725 | 40559726 | .     | .        | .        | .              | .                         | .         |
| chr17 | 40776409 | 40776410 | .     | .        | .        | .              | .                         | .         |
| chr17 | 41116480 | 41116481 | .     | .        | .        | .              | .                         | .         |
| chr17 | 41381966 | 41381967 | chr17 | 41381806 | 41382224 | ERV3.6A3_H     | LTR                       | ERVL      |
| chr17 | 41400981 | 41400982 | chr17 | 41400485 | 41401528 | LTR13          | LTR                       | ERVK      |
| chr17 | 41438829 | 41438830 | .     | .        | .        | .              | .                         | .         |
| chr17 | 41445584 | 41445585 | .     | .        | .        | .              | .                         | .         |
| chr17 | 41798225 | 41798226 | .     | .        | .        | .              | .                         | .         |
| chr17 | 42600726 | 42600727 | .     | .        | .        | .              | .                         | .         |
| chr17 | 43205138 | 43205139 | chr17 | 43205116 | 43205198 | (TG)n          | Simple_repe:Simple_repeat |           |
| chr17 | 45214563 | 45214564 | .     | .        | .        | .              | .                         | .         |
| chr17 | 45221272 | 45221273 | .     | .        | .        | .              | .                         | .         |
| chr17 | 45234375 | 45234376 | .     | .        | .        | .              | .                         | .         |
| chr17 | 45235645 | 45235646 | .     | .        | .        | .              | .                         | .         |
| chr17 | 45249333 | 45249334 | .     | .        | .        | .              | .                         | .         |
| chr17 | 45258962 | 45258963 | .     | .        | .        | .              | .                         | .         |
| chr17 | 48105281 | 48105282 | .     | .        | .        | .              | .                         | .         |
| chr17 | 48201546 | 48201547 | .     | .        | .        | .              | .                         | .         |
| chr17 | 48255583 | 48255584 | .     | .        | .        | .              | .                         | .         |
| chr17 | 49450193 | 49450194 | chr17 | 49449875 | 49450301 | MLT1J1         | LTR                       | ERVL-MaLR |
| chr17 | 55612781 | 55612782 | .     | .        | .        | .              | .                         | .         |
| chr17 | 55852476 | 55852477 | chr17 | 55852401 | 55852584 | MLT1J1         | LTR                       | ERVL-MaLR |
| chr17 | 56736815 | 56736816 | .     | .        | .        | .              | .                         | .         |
| chr17 | 61044429 | 61044430 | .     | .        | .        | .              | .                         | .         |
| chr17 | 62127452 | 62127453 | chr17 | 62127378 | 62127555 | MIRc           | SINE                      | MIR       |
| chr17 | 63319346 | 63319347 | chr17 | 63319041 | 63319399 | MLT1J2         | LTR                       | ERVL-MaLR |
| chr17 | 64927358 | 64927359 | chr17 | 64926980 | 64927449 | MLT1N2         | LTR                       | ERVL-MaLR |
| chr17 | 65477403 | 65477404 | chr17 | 65477365 | 65477607 | MLT1J          | LTR                       | ERVL-MaLR |
| chr17 | 66016023 | 66016024 | chr17 | 66016015 | 66016083 | tRNA-Arg-AG    | tRNA                      | tRNA      |
| chr17 | 70405990 | 70405991 | chr17 | 70405847 | 70406322 | MLT1J          | LTR                       | ERVL-MaLR |
| chr17 | 72186504 | 72186505 | chr17 | 72186445 | 72186545 | MLT1J          | LTR                       | ERVL-MaLR |
| chr17 | 72389166 | 72389167 | chr17 | 72389081 | 72389524 | MLT1J2         | LTR                       | ERVL-MaLR |
| chr17 | 72564814 | 72564815 | chr17 | 72564548 | 72564864 | (TG)n          | Simple_repe:Simple_repeat |           |
| chr17 | 75734977 | 75734978 | .     | .        | .        | .              | .                         | .         |
| chr17 | 75945130 | 75945131 | chr17 | 75944792 | 75945153 | MLT1J2         | LTR                       | ERVL-MaLR |
| chr17 | 76250653 | 76250654 | .     | .        | .        | .              | .                         | .         |
| chr17 | 76480447 | 76480448 | chr17 | 76480344 | 76480453 | L2a            | LINE                      | L2        |
| chr17 | 76579451 | 76579452 | chr17 | 76579350 | 76579467 | MLT1J          | LTR                       | ERVL-MaLR |
| chr17 | 76879268 | 76879269 | .     | .        | .        | .              | .                         | .         |
| chr17 | 77702553 | 77702554 | chr17 | 77702398 | 77702638 | MLT1J          | LTR                       | ERVL-MaLR |
| chr17 | 78428566 | 78428567 | .     | .        | .        | .              | .                         | .         |
| chr17 | 79392933 | 79392934 | .     | .        | .        | .              | .                         | .         |
| chr17 | 79544482 | 79544483 | .     | .        | .        | .              | .                         | .         |
| chr17 | 79701749 | 79701750 | .     | .        | .        | .              | .                         | .         |
| chr17 | 80225830 | 80225831 | .     | .        | .        | .              | .                         | .         |
| chr18 | 10520276 | 10520277 | .     | .        | .        | .              | .                         | .         |
| chr18 | 11962850 | 11962851 | .     | .        | .        | .              | .                         | .         |
| chr18 | 18512292 | 18512293 | chr18 | 18510901 | 18520342 | ALR/Alpha      | Satellite                 | centr     |
| chr18 | 18518132 | 18518133 | chr18 | 18510901 | 18520342 | ALR/Alpha      | Satellite                 | centr     |
| chr18 | 19494930 | 19494931 | .     | .        | .        | .              | .                         | .         |
| chr18 | 22264091 | 22264092 | chr18 | 22263874 | 22264238 | MLT1J2         | LTR                       | ERVL-MaLR |



|       |          |          |       |          |          |                |                           |           |
|-------|----------|----------|-------|----------|----------|----------------|---------------------------|-----------|
| chr18 | 23083782 | 23083783 | chr18 | 23083326 | 23083899 | MLT2F          | LTR                       | ERVL      |
| chr18 | 26728031 | 26728032 | chr18 | 26728001 | 26728097 | LTR67B         | LTR                       | ERVL      |
| chr18 | 32227484 | 32227485 | chr18 | 32227229 | 32227546 | MLT1J2         | LTR                       | ERVL-MaLR |
| chr18 | 43904790 | 43904791 | chr18 | 43904437 | 43904907 | MLT1J          | LTR                       | ERVL-MaLR |
| chr18 | 46333154 | 46333155 | .     | .        | .        | .              | .                         | .         |
| chr18 | 50319180 | 50319181 | chr18 | 50319112 | 50319228 | (CATT)n        | Simple_repe:Simple_repeat |           |
| chr18 | 57084258 | 57084259 | chr18 | 57084008 | 57084364 | MLT1J          | LTR                       | ERVL-MaLR |
| chr18 | 74608907 | 74608908 | .     | .        | .        | .              | .                         | .         |
| chr18 | 74822594 | 74822595 | .     | .        | .        | .              | .                         | .         |
| chr18 | 76252428 | 76252429 | .     | .        | .        | .              | .                         | .         |
| chr18 | 77331352 | 77331353 | .     | .        | .        | .              | .                         | .         |
| chr19 | 489051   | 489052   | .     | .        | .        | .              | .                         | .         |
| chr19 | 524185   | 524186   | .     | .        | .        | .              | .                         | .         |
| chr19 | 1311902  | 1311903  | .     | .        | .        | .              | .                         | .         |
| chr19 | 1848544  | 1848545  | .     | .        | .        | .              | .                         | .         |
| chr19 | 2494509  | 2494510  | .     | .        | .        | .              | .                         | .         |
| chr19 | 2524469  | 2524470  | chr19 | 2524327  | 2524485  | (TG)n          | Simple_repe:Simple_repeat |           |
| chr19 | 2950601  | 2950602  | .     | .        | .        | .              | .                         | .         |
| chr19 | 3036265  | 3036266  | .     | .        | .        | .              | .                         | .         |
| chr19 | 3244518  | 3244519  | chr19 | 3244343  | 3244785  | (TG)n          | Simple_repe:Simple_repeat |           |
| chr19 | 3369639  | 3369640  | .     | .        | .        | .              | .                         | .         |
| chr19 | 3435315  | 3435316  | .     | .        | .        | .              | .                         | .         |
| chr19 | 3743737  | 3743738  | chr19 | 3743648  | 3743890  | MLT1J          | LTR                       | ERVL-MaLR |
| chr19 | 3990342  | 3990343  | .     | .        | .        | .              | .                         | .         |
| chr19 | 4180299  | 4180300  | chr19 | 4180281  | 4180351  | MLT1J          | LTR                       | ERVL-MaLR |
| chr19 | 4577572  | 4577573  | .     | .        | .        | .              | .                         | .         |
| chr19 | 4815759  | 4815760  | chr19 | 4815667  | 4815837  | MLT1J          | LTR                       | ERVL-MaLR |
| chr19 | 5058101  | 5058102  | chr19 | 5057947  | 5058147  | MLT1J1         | LTR                       | ERVL-MaLR |
| chr19 | 5308883  | 5308884  | .     | .        | .        | .              | .                         | .         |
| chr19 | 5352360  | 5352361  | .     | .        | .        | .              | .                         | .         |
| chr19 | 5407561  | 5407562  | chr19 | 5407536  | 5407635  | MLT1J1         | LTR                       | ERVL-MaLR |
| chr19 | 5453039  | 5453040  | chr19 | 5452957  | 5453326  | MLT1J          | LTR                       | ERVL-MaLR |
| chr19 | 6604188  | 6604189  | chr19 | 6604075  | 6604286  | MLT1J          | LTR                       | ERVL-MaLR |
| chr19 | 6761207  | 6761208  | chr19 | 6761121  | 6761519  | MLT1J2         | LTR                       | ERVL-MaLR |
| chr19 | 6812112  | 6812113  | chr19 | 6811786  | 6812216  | MLT1J2         | LTR                       | ERVL-MaLR |
| chr19 | 7515791  | 7515792  | .     | .        | .        | .              | .                         | .         |
| chr19 | 7616409  | 7616410  | .     | .        | .        | .              | .                         | .         |
| chr19 | 8989208  | 8989209  | chr19 | 8989109  | 8989305  | LTR33A_        | LTR                       | ERVL      |
| chr19 | 10028101 | 10028102 | chr19 | 10028053 | 10028462 | LTR33A         | LTR                       | ERVL      |
| chr19 | 10155253 | 10155254 | chr19 | 10155236 | 10155398 | MLT1J          | LTR                       | ERVL-MaLR |
| chr19 | 10156255 | 10156256 | chr19 | 10155856 | 10156346 | LTR33B         | LTR                       | ERVL      |
| chr19 | 10479287 | 10479288 | chr19 | 10479267 | 10479349 | MLT1J2         | LTR                       | ERVL-MaLR |
| chr19 | 10990015 | 10990016 | chr19 | 10989762 | 10990113 | MLT1J          | LTR                       | ERVL-MaLR |
| chr19 | 11513084 | 11513085 | .     | .        | .        | .              | .                         | .         |
| chr19 | 11602018 | 11602019 | chr19 | 11601971 | 11602102 | MLT1J1         | LTR                       | ERVL-MaLR |
| chr19 | 13283418 | 13283419 | .     | .        | .        | .              | .                         | .         |
| chr19 | 13507632 | 13507633 | chr19 | 13507572 | 13507728 | LTR33          | LTR                       | ERVL      |
| chr19 | 13512361 | 13512362 | chr19 | 13512331 | 13512658 | MLT1J1         | LTR                       | ERVL-MaLR |
| chr19 | 13668754 | 13668755 | chr19 | 13668721 | 13668783 | MLT1J2         | LTR                       | ERVL-MaLR |
| chr19 | 13800129 | 13800130 | chr19 | 13800087 | 13800390 | MLT1J1         | LTR                       | ERVL-MaLR |
| chr19 | 13817029 | 13817030 | chr19 | 13817023 | 13817085 | MLT1J2         | LTR                       | ERVL-MaLR |
| chr19 | 13842561 | 13842562 | .     | .        | .        | .              | .                         | .         |
| chr19 | 13898818 | 13898819 | .     | .        | .        | .              | .                         | .         |
| chr19 | 13954455 | 13954456 | .     | .        | .        | .              | .                         | .         |
| chr19 | 14032150 | 14032151 | chr19 | 14031816 | 14032253 | MLT1J          | LTR                       | ERVL-MaLR |
| chr19 | 14192299 | 14192300 | .     | .        | .        | .              | .                         | .         |
| chr19 | 14593275 | 14593276 | .     | .        | .        | .              | .                         | .         |
| chr19 | 14743281 | 14743282 | chr19 | 14743153 | 14743585 | MLT1J          | LTR                       | ERVL-MaLR |
| chr19 | 17721442 | 17721443 | chr19 | 17721332 | 17721557 | MLT1J          | LTR                       | ERVL-MaLR |
| chr19 | 17782847 | 17782848 | chr19 | 17782711 | 17783139 | MLT1J          | LTR                       | ERVL-MaLR |
| chr19 | 18279183 | 18279184 | .     | .        | .        | .              | .                         | .         |
| chr19 | 19477757 | 19477758 | .     | .        | .        | .              | .                         | .         |
| chr19 | 24184068 | 24184069 | chr19 | 24183459 | 24184250 | LSU-rRNA_HrRNA | rRNA                      | centr     |
| chr19 | 24526186 | 24526187 | chr19 | 24515480 | 24529460 | ALR/Alpha      | Satellite                 | centr     |
| chr19 | 27732142 | 27732143 | chr19 | 27731784 | 27741731 | ALR/Alpha      | Satellite                 | centr     |
| chr19 | 27738489 | 27738490 | chr19 | 27731784 | 27741731 | ALR/Alpha      | Satellite                 | centr     |
| chr19 | 27967140 | 27967141 | chr19 | 27960649 | 27972538 | ALR/Alpha      | Satellite                 | centr     |
| chr19 | 30023205 | 30023206 | chr19 | 30023089 | 30023218 | MLT1J1         | LTR                       | ERVL-MaLR |
| chr19 | 30336203 | 30336204 | .     | .        | .        | .              | .                         | .         |
| chr19 | 34625480 | 34625481 | .     | .        | .        | .              | .                         | .         |
| chr19 | 36066539 | 36066540 | chr19 | 36066505 | 36066675 | LSU-rRNA_HrRNA | rRNA                      |           |
| chr19 | 36099360 | 36099361 | chr19 | 36099332 | 36099562 | MLT1J2         | LTR                       | ERVL-MaLR |
| chr19 | 36363264 | 36363265 | .     | .        | .        | .              | .                         | .         |
| chr19 | 36422612 | 36422613 | .     | .        | .        | .              | .                         | .         |
| chr19 | 36618831 | 36618832 | .     | .        | .        | .              | .                         | .         |
| chr19 | 37709060 | 37709061 | .     | .        | .        | .              | .                         | .         |
| chr19 | 38510142 | 38510143 | chr19 | 38509783 | 38510229 | MLT1J          | LTR                       | ERVL-MaLR |
| chr19 | 38640427 | 38640428 | chr19 | 38640351 | 38640540 | MLT1J          | LTR                       | ERVL-MaLR |
| chr19 | 38653536 | 38653537 | chr19 | 38653246 | 38653614 | MLT1J2         | LTR                       | ERVL-MaLR |
| chr19 | 39174942 | 39174943 | .     | .        | .        | .              | .                         | .         |
| chr19 | 41571051 | 41571052 | chr19 | 41570924 | 41571310 | MLT1J          | LTR                       | ERVL-MaLR |
| chr19 | 41755857 | 41755858 | chr19 | 41755680 | 41755905 | LTR33A         | LTR                       | ERVL      |
| chr19 | 42748974 | 42748975 | .     | .        | .        | .              | .                         | .         |
| chr19 | 42772935 | 42772936 | .     | .        | .        | .              | .                         | .         |
| chr19 | 44711624 | 44711625 | .     | .        | .        | .              | .                         | .         |
| chr19 | 45216573 | 45216574 | .     | .        | .        | .              | .                         | .         |
| chr19 | 45316983 | 45316984 | .     | .        | .        | .              | .                         | .         |
| chr19 | 45829608 | 45829609 | chr19 | 45829466 | 45829645 | MLT1N2         | LTR                       | ERVL-MaLR |
| chr19 | 45894751 | 45894752 | chr19 | 45894728 | 45895071 | MLT1J          | LTR                       | ERVL-MaLR |
| chr19 | 45982018 | 45982019 | .     | .        | .        | .              | .                         | .         |
| chr19 | 45988745 | 45988746 | .     | .        | .        | .              | .                         | .         |
| chr19 | 46027205 | 46027206 | .     | .        | .        | .              | .                         | .         |
| chr19 | 46220901 | 46220902 | .     | .        | .        | .              | .                         | .         |
| chr19 | 46431107 | 46431108 | chr19 | 46431009 | 46431177 | LTR67B         | LTR                       | ERVL      |
| chr19 | 47049963 | 47049964 | chr19 | 47049903 | 47050044 | MLT1J2         | LTR                       | ERVL-MaLR |
| chr19 | 47402252 | 47402253 | chr19 | 47402072 | 47402363 | LTR33A         | LTR                       | ERVL      |
| chr19 | 47867490 | 47867491 | chr19 | 47867322 | 47867608 | MLT1J2         | LTR                       | ERVL-MaLR |
| chr19 | 47942250 | 47942251 | chr19 | 47942168 | 47942438 | MLT1J2         | LTR                       | ERVL-MaLR |
| chr19 | 48707318 | 48707319 | .     | .        | .        | .              | .                         | .         |
| chr19 | 48832907 | 48832908 | .     | .        | .        | .              | .                         | .         |
| chr19 | 48848341 | 48848342 | .     | .        | .        | .              | .                         | .         |
| chr19 | 48903854 | 48903855 | .     | .        | .        | .              | .                         | .         |
| chr19 | 48907041 | 48907042 | .     | .        | .        | .              | .                         | .         |
| chr19 | 48922683 | 48922684 | .     | .        | .        | .              | .                         | .         |
| chr19 | 49013945 | 49013946 | .     | .        | .        | .              | .                         | .         |
| chr19 | 49228292 | 49228293 | .     | .        | .        | .              | .                         | .         |
| chr19 | 49238377 | 49238378 | .     | .        | .        | .              | .                         | .         |

|       |           |           |       |           |           |           |               |               |   |
|-------|-----------|-----------|-------|-----------|-----------|-----------|---------------|---------------|---|
| chr19 | 49262561  | 49262562  | .     | .         | .         | .         | .             | .             | . |
| chr19 | 49298786  | 49298787  | .     | .         | .         | .         | .             | .             | . |
| chr19 | 49310056  | 49310057  | .     | .         | .         | .         | .             | .             | . |
| chr19 | 49355695  | 49355696  | .     | .         | .         | .         | .             | .             | . |
| chr19 | 49362071  | 49362072  | .     | .         | .         | .         | .             | .             | . |
| chr19 | 49385180  | 49385181  | .     | .         | .         | .         | .             | .             | . |
| chr19 | 49416567  | 49416568  | .     | .         | .         | .         | .             | .             | . |
| chr19 | 49422160  | 49422161  | .     | .         | .         | .         | .             | .             | . |
| chr19 | 49447990  | 49447991  | .     | .         | .         | .         | .             | .             | . |
| chr19 | 49479652  | 49479653  | .     | .         | .         | .         | .             | .             | . |
| chr19 | 49485753  | 49485754  | .     | .         | .         | .         | .             | .             | . |
| chr19 | 49486905  | 49486906  | .     | .         | .         | .         | .             | .             | . |
| chr19 | 49490394  | 49490395  | .     | .         | .         | .         | .             | .             | . |
| chr19 | 49835072  | 49835073  | chr19 | 49834909  | 49835121  | MLT1J2    | LTR           | ERVL-MaLR     |   |
| chr19 | 49851199  | 49851200  | chr19 | 49851134  | 49851535  | MLT1J2    | LTR           | ERVL-MaLR     |   |
| chr19 | 49947116  | 49947117  | .     | .         | .         | .         | .             | .             | . |
| chr19 | 49968817  | 49968818  | .     | .         | .         | .         | .             | .             | . |
| chr19 | 50163200  | 50163201  | .     | .         | .         | .         | .             | .             | . |
| chr19 | 50252787  | 50252788  | chr19 | 50252717  | 50252872  | MLT1J     | LTR           | ERVL-MaLR     |   |
| chr19 | 50339838  | 50339839  | .     | .         | .         | .         | .             | .             | . |
| chr19 | 50501087  | 50501088  | chr19 | 50500985  | 50501447  | MLT1J     | LTR           | ERVL-MaLR     |   |
| chr19 | 50651571  | 50651572  | .     | .         | .         | .         | .             | .             | . |
| chr19 | 50836864  | 50836865  | .     | .         | .         | .         | .             | .             | . |
| chr19 | 51263307  | 51263308  | chr19 | 51263195  | 51263433  | MLT1J     | LTR           | ERVL-MaLR     |   |
| chr19 | 51963873  | 51963874  | chr19 | 51963819  | 51964016  | MLT2F     | LTR           | ERVL          |   |
| chr19 | 53400861  | 53400862  | .     | .         | .         | .         | .             | .             | . |
| chr19 | 54382751  | 54382752  | .     | .         | .         | .         | .             | .             | . |
| chr19 | 54396440  | 54396441  | .     | .         | .         | .         | .             | .             | . |
| chr19 | 54411542  | 54411543  | .     | .         | .         | .         | .             | .             | . |
| chr19 | 54480888  | 54480889  | .     | .         | .         | .         | .             | .             | . |
| chr19 | 54503165  | 54503166  | .     | .         | .         | .         | .             | .             | . |
| chr19 | 54682411  | 54682412  | .     | .         | .         | .         | .             | .             | . |
| chr19 | 55577677  | 55577678  | .     | .         | .         | .         | .             | .             | . |
| chr19 | 55607080  | 55607081  | .     | .         | .         | .         | .             | .             | . |
| chr19 | 55709071  | 55709072  | .     | .         | .         | .         | .             | .             | . |
| chr19 | 55800724  | 55800725  | .     | .         | .         | .         | .             | .             | . |
| chr19 | 55817031  | 55817032  | .     | .         | .         | .         | .             | .             | . |
| chr19 | 55831338  | 55831339  | .     | .         | .         | .         | .             | .             | . |
| chr19 | 56028902  | 56028903  | .     | .         | .         | .         | .             | .             | . |
| chr19 | 56826316  | 56826317  | .     | .         | .         | .         | .             | .             | . |
| chr19 | 58071240  | 58071241  | .     | .         | .         | .         | .             | .             | . |
| chr19 | 58330976  | 58330977  | .     | .         | .         | .         | .             | .             | . |
| chr19 | 58666551  | 58666552  | .     | .         | .         | .         | .             | .             | . |
| chr19 | 58816644  | 58816645  | .     | .         | .         | .         | .             | .             | . |
| chr19 | 59010936  | 59010937  | .     | .         | .         | .         | .             | .             | . |
| chr2  | 1018168   | 1018169   | .     | .         | .         | .         | .             | .             | . |
| chr2  | 2617345   | 2617346   | chr2  | 2617318   | 2617363   | L1M6      | LINE          | L1            |   |
| chr2  | 10552734  | 10552735  | chr2  | 10552532  | 10552786  | MLT1J2    | LTR           | ERVL-MaLR     |   |
| chr2  | 20550673  | 20550674  | .     | .         | .         | .         | .             | .             | . |
| chr2  | 23598513  | 23598514  | .     | .         | .         | .         | .             | .             | . |
| chr2  | 24694712  | 24694713  | chr2  | 24694638  | 24694867  | MLT1J1    | LTR           | ERVL-MaLR     |   |
| chr2  | 26296434  | 26296435  | chr2  | 26296350  | 26296544  | LTR33B    | LTR           | ERVL          |   |
| chr2  | 26992075  | 26992076  | .     | .         | .         | .         | .             | .             | . |
| chr2  | 26995744  | 26995745  | chr2  | 26995708  | 26995868  | MER117    | DNA           | hAT-Charlie   |   |
| chr2  | 27304227  | 27304228  | .     | .         | .         | .         | .             | .             | . |
| chr2  | 27319318  | 27319319  | .     | .         | .         | .         | .             | .             | . |
| chr2  | 28384016  | 28384017  | .     | .         | .         | .         | .             | .             | . |
| chr2  | 28497845  | 28497846  | .     | .         | .         | .         | .             | .             | . |
| chr2  | 28624944  | 28624945  | .     | .         | .         | .         | .             | .             | . |
| chr2  | 36845642  | 36845643  | chr2  | 36845622  | 36846012  | MLT1J1    | LTR           | ERVL-MaLR     |   |
| chr2  | 37552153  | 37552154  | .     | .         | .         | .         | .             | .             | . |
| chr2  | 43172092  | 43172093  | chr2  | 43171997  | 43172164  | LTR33B    | LTR           | ERVL          |   |
| chr2  | 43370347  | 43370348  | chr2  | 43370002  | 43370437  | MLT1N2    | LTR           | ERVL-MaLR     |   |
| chr2  | 46219454  | 46219455  | .     | .         | .         | .         | .             | .             | . |
| chr2  | 70704700  | 70704701  | chr2  | 70704621  | 70705022  | MLT1J2    | LTR           | ERVL-MaLR     |   |
| chr2  | 70974631  | 70974632  | .     | .         | .         | .         | .             | .             | . |
| chr2  | 71938857  | 71938858  | .     | .         | .         | .         | .             | .             | . |
| chr2  | 85645703  | 85645704  | .     | .         | .         | .         | .             | .             | . |
| chr2  | 85728579  | 85728580  | chr2  | 85728173  | 85728663  | LTR33A    | LTR           | ERVL          |   |
| chr2  | 88844874  | 88844875  | chr2  | 88844752  | 88844960  | MLT1J     | LTR           | ERVL-MaLR     |   |
| chr2  | 89867468  | 89867469  | chr2  | 89867359  | 89867538  | (CATT)n   | Satellite     | Satellite     |   |
| chr2  | 91760761  | 91760762  | chr2  | 91760681  | 91760813  | (CA)n     | Simple_repeat | Simple_repeat |   |
| chr2  | 91793937  | 91793938  | .     | .         | .         | .         | .             | .             | . |
| chr2  | 92267644  | 92267645  | chr2  | 92267522  | 92268924  | HSATII    | Satellite     | Satellite     |   |
| chr2  | 92269347  | 92269348  | chr2  | 92268957  | 92270058  | HSATII    | Satellite     | Satellite     |   |
| chr2  | 92275945  | 92275946  | chr2  | 92274434  | 92312482  | ALR/Alpha | Satellite     | centr         |   |
| chr2  | 92281336  | 92281337  | chr2  | 92274434  | 92312482  | ALR/Alpha | Satellite     | centr         |   |
| chr2  | 92290538  | 92290539  | chr2  | 92274434  | 92312482  | ALR/Alpha | Satellite     | centr         |   |
| chr2  | 92296854  | 92296855  | chr2  | 92274434  | 92312482  | ALR/Alpha | Satellite     | centr         |   |
| chr2  | 92305757  | 92305758  | chr2  | 92274434  | 92312482  | ALR/Alpha | Satellite     | centr         |   |
| chr2  | 92317747  | 92317748  | chr2  | 92315719  | 92326171  | ALR/Alpha | Satellite     | centr         |   |
| chr2  | 92323578  | 92323579  | chr2  | 92315719  | 92326171  | ALR/Alpha | Satellite     | centr         |   |
| chr2  | 95873244  | 95873245  | .     | .         | .         | .         | .             | .             | . |
| chr2  | 95999571  | 95999572  | .     | .         | .         | .         | .             | .             | . |
| chr2  | 97198153  | 97198154  | .     | .         | .         | .         | .             | .             | . |
| chr2  | 104995367 | 104995368 | chr2  | 104995282 | 104995711 | LTR33A    | LTR           | ERVL          |   |
| chr2  | 107405909 | 107405910 | chr2  | 107405701 | 107405923 | MLT1J1    | LTR           | ERVL-MaLR     |   |
| chr2  | 110970133 | 110970134 | .     | .         | .         | .         | .             | .             | . |
| chr2  | 118955071 | 118955072 | chr2  | 118954696 | 118955181 | MLT1J     | LTR           | ERVL-MaLR     |   |
| chr2  | 132996331 | 132996332 | chr2  | 132994855 | 133000000 | ALR/Alpha | Satellite     | centr         |   |
| chr2  | 132997520 | 132997521 | chr2  | 132994855 | 133000000 | ALR/Alpha | Satellite     | centr         |   |
| chr2  | 133003326 | 133003327 | chr2  | 133000001 | 133006070 | ALR/Alpha | Satellite     | centr         |   |
| chr2  | 133023216 | 133023217 | .     | .         | .         | .         | .             | .             | . |
| chr2  | 133090114 | 133090115 | .     | .         | .         | .         | .             | .             | . |
| chr2  | 133105026 | 133105027 | .     | .         | .         | .         | .             | .             | . |
| chr2  | 150600621 | 150600622 | .     | .         | .         | .         | .             | .             | . |
| chr2  | 161098389 | 161098390 | .     | .         | .         | .         | .             | .             | . |
| chr2  | 162138987 | 162138988 | .     | .         | .         | .         | .             | .             | . |
| chr2  | 189494211 | 189494212 | .     | .         | .         | .         | .             | .             | . |
| chr2  | 191885185 | 191885186 | .     | .         | .         | .         | .             | .             | . |
| chr2  | 200324821 | 200324822 | .     | .         | .         | .         | .             | .             | . |
| chr2  | 200524152 | 200524153 | .     | .         | .         | .         | .             | .             | . |
| chr2  | 207288120 | 207288121 | chr2  | 207287796 | 207288207 | MLT1J2    | LTR           | ERVL-MaLR     |   |
| chr2  | 210791656 | 210791657 | .     | .         | .         | .         | .             | .             | . |
| chr2  | 218515074 | 218515075 | chr2  | 218515050 | 218515463 | MLT1J1    | LTR           | ERVL-MaLR     |   |
| chr2  | 219260956 | 219260957 | .     | .         | .         | .         | .             | .             | . |
| chr2  | 220151017 | 220151018 | .     | .         | .         | .         | .             | .             | . |





|      |          |          |      |          |          |            |                           |             |   |
|------|----------|----------|------|----------|----------|------------|---------------------------|-------------|---|
| chr5 | 1653102  | 1653103  | .    | .        | .        | .          | .                         | .           | . |
| chr5 | 1662862  | 1662863  | chr5 | 1662841  | 1663069  | (TG)n      | Simple_repe:Simple_repeat |             |   |
| chr5 | 1692889  | 1692890  | chr5 | 1692393  | 1693187  | LTR1D      | LTR                       | ERV1        |   |
| chr5 | 1929987  | 1929988  | chr5 | 1929896  | 1930335  | (TG)n      | Simple_repe:Simple_repeat |             |   |
| chr5 | 1960621  | 1960622  | chr5 | 1960542  | 1960791  | (CA)n      | Simple_repe:Simple_repeat |             |   |
| chr5 | 1986029  | 1986030  | .    | .        | .        | .          | .                         | .           | . |
| chr5 | 2031978  | 2031979  | .    | .        | .        | .          | .                         | .           | . |
| chr5 | 2082970  | 2082971  | .    | .        | .        | .          | .                         | .           | . |
| chr5 | 2227761  | 2227762  | .    | .        | .        | .          | .                         | .           | . |
| chr5 | 2291695  | 2291696  | .    | .        | .        | .          | .                         | .           | . |
| chr5 | 2531684  | 2531685  | chr5 | 2531477  | 2531735  | (CA)n      | Simple_repe:Simple_repeat |             |   |
| chr5 | 2541948  | 2541949  | chr5 | 2541822  | 2542011  | (TG)n      | Simple_repe:Simple_repeat |             |   |
| chr5 | 2568874  | 2568875  | chr5 | 2568690  | 2569056  | LTR33      | LTR                       | ERVL        |   |
| chr5 | 2669475  | 2669476  | chr5 | 2669445  | 2669623  | (CA)n      | Simple_repe:Simple_repeat |             |   |
| chr5 | 2764763  | 2764764  | .    | .        | .        | .          | .                         | .           | . |
| chr5 | 2767425  | 2767426  | chr5 | 2767266  | 2767611  | MER74B     | LTR                       | ERVL        |   |
| chr5 | 2889098  | 2889099  | chr5 | 2889006  | 2889295  | (TG)n      | Simple_repe:Simple_repeat |             |   |
| chr5 | 3042724  | 3042725  | .    | .        | .        | .          | .                         | .           | . |
| chr5 | 3238638  | 3238639  | .    | .        | .        | .          | .                         | .           | . |
| chr5 | 3324311  | 3324312  | chr5 | 3324150  | 3324313  | (TG)n      | Simple_repe:Simple_repeat |             |   |
| chr5 | 3373587  | 3373588  | chr5 | 3373569  | 3373728  | L1M3a      | LINE                      | L1          |   |
| chr5 | 3481428  | 3481429  | .    | .        | .        | .          | .                         | .           | . |
| chr5 | 3727349  | 3727350  | .    | .        | .        | .          | .                         | .           | . |
| chr5 | 4080828  | 4080829  | chr5 | 4080438  | 4080857  | (CA)n      | Simple_repe:Simple_repeat |             |   |
| chr5 | 4080828  | 4080829  | chr5 | 4080771  | 4080899  | (CATG)n    | Simple_repe:Simple_repeat |             |   |
| chr5 | 4114785  | 4114786  | .    | .        | .        | .          | .                         | .           | . |
| chr5 | 4133069  | 4133070  | .    | .        | .        | .          | .                         | .           | . |
| chr5 | 4145282  | 4145283  | .    | .        | .        | .          | .                         | .           | . |
| chr5 | 4155095  | 4155096  | .    | .        | .        | .          | .                         | .           | . |
| chr5 | 4580920  | 4580921  | .    | .        | .        | .          | .                         | .           | . |
| chr5 | 4905128  | 4905129  | .    | .        | .        | .          | .                         | .           | . |
| chr5 | 4987961  | 4987962  | chr5 | 4987632  | 4987968  | MER77      | LTR                       | ERVL        |   |
| chr5 | 5017296  | 5017297  | chr5 | 5017268  | 5017664  | L2a        | LINE                      | L2          |   |
| chr5 | 5081236  | 5081237  | .    | .        | .        | .          | .                         | .           | . |
| chr5 | 5175914  | 5175915  | chr5 | 5174945  | 5176223  | L1M1       | LINE                      | L1          |   |
| chr5 | 5183396  | 5183397  | .    | .        | .        | .          | .                         | .           | . |
| chr5 | 5340562  | 5340563  | .    | .        | .        | .          | .                         | .           | . |
| chr5 | 5470167  | 5470168  | .    | .        | .        | .          | .                         | .           | . |
| chr5 | 5491106  | 5491107  | .    | .        | .        | .          | .                         | .           | . |
| chr5 | 5514677  | 5514678  | chr5 | 5514493  | 5514944  | MLT1G      | LTR                       | ERVL-MaLR   |   |
| chr5 | 5600372  | 5600373  | chr5 | 5599139  | 5600661  | ERV3.6A3_H | LTR                       | ERVL        |   |
| chr5 | 5667703  | 5667704  | .    | .        | .        | .          | .                         | .           | . |
| chr5 | 5677809  | 5677810  | .    | .        | .        | .          | .                         | .           | . |
| chr5 | 6045348  | 6045349  | .    | .        | .        | .          | .                         | .           | . |
| chr5 | 6081050  | 6081051  | chr5 | 6080965  | 6081110  | (CA)n      | Simple_repe:Simple_repeat |             |   |
| chr5 | 6409143  | 6409144  | chr5 | 6409118  | 6409516  | MLT1A1     | LTR                       | ERVL-MaLR   |   |
| chr5 | 6550985  | 6550986  | .    | .        | .        | .          | .                         | .           | . |
| chr5 | 6615055  | 6615056  | .    | .        | .        | .          | .                         | .           | . |
| chr5 | 6686254  | 6686255  | chr5 | 6686165  | 6686320  | L2a        | LINE                      | L2          |   |
| chr5 | 6805401  | 6805402  | .    | .        | .        | .          | .                         | .           | . |
| chr5 | 6837096  | 6837097  | .    | .        | .        | .          | .                         | .           | . |
| chr5 | 6858765  | 6858766  | chr5 | 6858548  | 6859147  | LTR16D     | LTR                       | ERVL        |   |
| chr5 | 6904166  | 6904167  | .    | .        | .        | .          | .                         | .           | . |
| chr5 | 6934045  | 6934046  | chr5 | 6934019  | 6934259  | LTR16E1    | LTR                       | ERVL        |   |
| chr5 | 6961418  | 6961419  | chr5 | 6961217  | 6961652  | (CA)n      | Simple_repe:Simple_repeat |             |   |
| chr5 | 7068497  | 7068498  | chr5 | 7068344  | 7068523  | MER20      | DNA                       | hAT-Charlie |   |
| chr5 | 7315228  | 7315229  | .    | .        | .        | .          | .                         | .           | . |
| chr5 | 7384591  | 7384592  | .    | .        | .        | .          | .                         | .           | . |
| chr5 | 7459344  | 7459345  | chr5 | 7459275  | 7459368  | MLT1H2     | LTR                       | ERVL-MaLR   |   |
| chr5 | 7520436  | 7520437  | .    | .        | .        | .          | .                         | .           | . |
| chr5 | 7597412  | 7597413  | .    | .        | .        | .          | .                         | .           | . |
| chr5 | 7674423  | 7674424  | .    | .        | .        | .          | .                         | .           | . |
| chr5 | 7718721  | 7718722  | .    | .        | .        | .          | .                         | .           | . |
| chr5 | 7727156  | 7727157  | .    | .        | .        | .          | .                         | .           | . |
| chr5 | 7881522  | 7881523  | chr5 | 7881287  | 7881642  | ERV3.6A3_H | LTR                       | ERVL        |   |
| chr5 | 7927516  | 7927517  | .    | .        | .        | .          | .                         | .           | . |
| chr5 | 8121281  | 8121282  | chr5 | 8121030  | 8121727  | L1M3e      | LINE                      | L1          |   |
| chr5 | 8143829  | 8143830  | chr5 | 8143784  | 8143965  | MLT1J2     | LTR                       | ERVL-MaLR   |   |
| chr5 | 8209117  | 8209118  | chr5 | 8209059  | 8209295  | (TG)n      | Simple_repe:Simple_repeat |             |   |
| chr5 | 8543240  | 8543241  | .    | .        | .        | .          | .                         | .           | . |
| chr5 | 8615485  | 8615486  | chr5 | 8615251  | 8615661  | (CA)n      | Simple_repe:Simple_repeat |             |   |
| chr5 | 8806236  | 8806237  | chr5 | 8805263  | 8806363  | THE1B-int  | LTR                       | ERVL-MaLR   |   |
| chr5 | 8844056  | 8844057  | .    | .        | .        | .          | .                         | .           | . |
| chr5 | 8935940  | 8935941  | chr5 | 8935592  | 8937853  | L1PA13     | LINE                      | L1          |   |
| chr5 | 8974087  | 8974088  | chr5 | 8969526  | 8975304  | L1MA4A     | LINE                      | L1          |   |
| chr5 | 8981414  | 8981415  | chr5 | 8981166  | 8981844  | MER54A     | LTR                       | ERVL        |   |
| chr5 | 9271840  | 9271841  | chr5 | 9271724  | 9278082  | L1PA7      | LINE                      | L1          |   |
| chr5 | 9332277  | 9332278  | .    | .        | .        | .          | .                         | .           | . |
| chr5 | 9346796  | 9346797  | chr5 | 9346037  | 9346949  | LTR1D      | LTR                       | ERV1        |   |
| chr5 | 9372648  | 9372649  | .    | .        | .        | .          | .                         | .           | . |
| chr5 | 9933075  | 9933076  | chr5 | 9933012  | 9933182  | MLT1J2     | LTR                       | ERVL-MaLR   |   |
| chr5 | 10126632 | 10126633 | chr5 | 10126319 | 10126754 | MLT1C      | LTR                       | ERVL-MaLR   |   |
| chr5 | 10140465 | 10140466 | .    | .        | .        | .          | .                         | .           | . |
| chr5 | 10233176 | 10233177 | .    | .        | .        | .          | .                         | .           | . |
| chr5 | 10278090 | 10278091 | chr5 | 10278005 | 10278171 | LTR86B1    | LTR                       | ERVL        |   |
| chr5 | 10290260 | 10290261 | .    | .        | .        | .          | .                         | .           | . |
| chr5 | 10331704 | 10331705 | .    | .        | .        | .          | .                         | .           | . |
| chr5 | 10373775 | 10373776 | .    | .        | .        | .          | .                         | .           | . |
| chr5 | 10377194 | 10377195 | .    | .        | .        | .          | .                         | .           | . |
| chr5 | 10432613 | 10432614 | .    | .        | .        | .          | .                         | .           | . |
| chr5 | 10503529 | 10503530 | .    | .        | .        | .          | .                         | .           | . |
| chr5 | 10537922 | 10537923 | .    | .        | .        | .          | .                         | .           | . |
| chr5 | 10595215 | 10595216 | .    | .        | .        | .          | .                         | .           | . |
| chr5 | 10601485 | 10601486 | chr5 | 10601465 | 10601777 | L2c        | LINE                      | L2          |   |
| chr5 | 10638817 | 10638818 | .    | .        | .        | .          | .                         | .           | . |
| chr5 | 10777363 | 10777364 | chr5 | 10777280 | 10777467 | (CA)n      | Simple_repe:Simple_repeat |             |   |
| chr5 | 11174098 | 11174099 | chr5 | 11173999 | 11174534 | L2b        | LINE                      | L2          |   |
| chr5 | 11181833 | 11181834 | chr5 | 11181761 | 11182374 | (TG)n      | Simple_repe:Simple_repeat |             |   |
| chr5 | 11192078 | 11192079 | chr5 | 11191581 | 11192189 | MLT2F      | LTR                       | ERVL        |   |
| chr5 | 11240840 | 11240841 | chr5 | 11240813 | 11241292 | (CA)n      | Simple_repe:Simple_repeat |             |   |
| chr5 | 11258317 | 11258318 | .    | .        | .        | .          | .                         | .           | . |
| chr5 | 11373203 | 11373204 | .    | .        | .        | .          | .                         | .           | . |
| chr5 | 11467163 | 11467164 | .    | .        | .        | .          | .                         | .           | . |
| chr5 | 11484275 | 11484276 | .    | .        | .        | .          | .                         | .           | . |
| chr5 | 11561036 | 11561037 | .    | .        | .        | .          | .                         | .           | . |
| chr5 | 11642646 | 11642647 | chr5 | 11642271 | 11642739 | L2a        | LINE                      | L2          |   |
| chr5 | 11721871 | 11721872 | chr5 | 11721593 | 11722062 | MLT1G1     | LTR                       | ERVL-MaLR   |   |

|      |          |          |      |          |          |             |         |             |
|------|----------|----------|------|----------|----------|-------------|---------|-------------|
| chr5 | 11786127 | 11786128 | .    | .        | .        | .           | .       | .           |
| chr5 | 12050184 | 12050185 | chr5 | 12050159 | 12051107 | L1MCc       | LINE    | L1          |
| chr5 | 12132951 | 12132952 | chr5 | 12131916 | 12138444 | L1PA15      | LINE    | L1          |
| chr5 | 12299736 | 12299737 | .    | .        | .        | .           | .       | .           |
| chr5 | 12320724 | 12320725 | chr5 | 12320382 | 12321184 | L1PA13      | LINE    | L1          |
| chr5 | 12385281 | 12385282 | chr5 | 12382084 | 12385987 | L1PA13      | LINE    | L1          |
| chr5 | 12468142 | 12468143 | chr5 | 12467336 | 12474027 | L1PREC2     | LINE    | L1          |
| chr5 | 12488737 | 12488738 | .    | .        | .        | .           | .       | .           |
| chr5 | 12532648 | 12532649 | chr5 | 12531999 | 12533869 | L1PB4       | LINE    | L1          |
| chr5 | 12674697 | 12674698 | chr5 | 12672681 | 12674833 | L1P3        | LINE    | L1          |
| chr5 | 12717804 | 12717805 | chr5 | 12716890 | 12718465 | MERS2A      | LTR     | ERV1        |
| chr5 | 12805704 | 12805705 | chr5 | 12804876 | 12805784 | LTR1D       | LTR     | ERV1        |
| chr5 | 12846126 | 12846127 | chr5 | 12845574 | 12846452 | L1M2c       | LINE    | L1          |
| chr5 | 12877325 | 12877326 | chr5 | 12876677 | 12877731 | LTR1D       | LTR     | ERV1        |
| chr5 | 12883805 | 12883806 | chr5 | 12883622 | 12883944 | MER1B       | DNA     | hAT-Charlie |
| chr5 | 12935400 | 12935401 | chr5 | 12935264 | 12936108 | HERVL18-int | LTR     | ERVL        |
| chr5 | 12995306 | 12995307 | .    | .        | .        | .           | .       | .           |
| chr5 | 13070818 | 13070819 | chr5 | 13070329 | 13071923 | MSTA-int    | LTR     | ERVL-MaLR   |
| chr5 | 13190019 | 13190020 | .    | .        | .        | .           | .       | .           |
| chr5 | 13214541 | 13214542 | chr5 | 13214376 | 13214611 | L2c         | LINE    | L2          |
| chr5 | 13218784 | 13218785 | chr5 | 13217668 | 13219326 | MLT1A0-int  | LTR     | ERVL-MaLR   |
| chr5 | 13231247 | 13231248 | chr5 | 13230910 | 13231477 | MLT2B3      | LTR     | ERVL        |
| chr5 | 13331859 | 13331860 | .    | .        | .        | .           | .       | .           |
| chr5 | 13383058 | 13383059 | chr5 | 13381400 | 13384624 | L1PA16      | LINE    | L1          |
| chr5 | 13410317 | 13410318 | chr5 | 13409411 | 13411488 | L1M2a       | LINE    | L1          |
| chr5 | 13494322 | 13494323 | chr5 | 13492445 | 13494628 | L1PA15      | LINE    | L1          |
| chr5 | 13538064 | 13538065 | chr5 | 13537730 | 13538192 | MLT1C       | LTR     | ERVL-MaLR   |
| chr5 | 13554187 | 13554188 | .    | .        | .        | .           | .       | .           |
| chr5 | 13663687 | 13663688 | .    | .        | .        | .           | .       | .           |
| chr5 | 13888207 | 13888208 | chr5 | 13887577 | 13888636 | L2a         | LINE    | L2          |
| chr5 | 13894186 | 13894187 | chr5 | 13894120 | 13894321 | MER103C     | DNA     | hAT-Charlie |
| chr5 | 13955009 | 13955010 | .    | .        | .        | .           | .       | .           |
| chr5 | 13986324 | 13986325 | .    | .        | .        | .           | .       | .           |
| chr5 | 14006417 | 14006418 | chr5 | 14006229 | 14006438 | MIRb        | SINE    | MIR         |
| chr5 | 14011329 | 14011330 | .    | .        | .        | .           | .       | .           |
| chr5 | 14061416 | 14061417 | chr5 | 14061400 | 14061479 | MLT1N2      | LTR     | ERVL-MaLR   |
| chr5 | 14083426 | 14083427 | .    | .        | .        | .           | .       | .           |
| chr5 | 14094858 | 14094859 | .    | .        | .        | .           | .       | .           |
| chr5 | 14125574 | 14125575 | chr5 | 14125549 | 14125647 | MLT1J2      | LTR     | ERVL-MaLR   |
| chr5 | 14157359 | 14157360 | .    | .        | .        | .           | .       | .           |
| chr5 | 14262215 | 14262216 | .    | .        | .        | .           | .       | .           |
| chr5 | 14268524 | 14268525 | .    | .        | .        | .           | .       | .           |
| chr5 | 14394590 | 14394591 | .    | .        | .        | .           | .       | .           |
| chr5 | 14452230 | 14452231 | .    | .        | .        | .           | .       | .           |
| chr5 | 14491564 | 14491565 | .    | .        | .        | .           | .       | .           |
| chr5 | 14542854 | 14542855 | chr5 | 14542740 | 14543439 | L1M2        | LINE    | L1          |
| chr5 | 14751363 | 14751364 | .    | .        | .        | .           | .       | .           |
| chr5 | 14802330 | 14802331 | chr5 | 14802188 | 14802739 | L2a         | LINE    | L2          |
| chr5 | 14869097 | 14869098 | .    | .        | .        | .           | .       | .           |
| chr5 | 14889004 | 14889005 | chr5 | 14888927 | 14889353 | MLT1C       | LTR     | ERVL-MaLR   |
| chr5 | 14917675 | 14917676 | .    | .        | .        | .           | .       | .           |
| chr5 | 14927127 | 14927128 | .    | .        | .        | .           | .       | .           |
| chr5 | 14960856 | 14960857 | .    | .        | .        | .           | .       | .           |
| chr5 | 15008827 | 15008828 | .    | .        | .        | .           | .       | .           |
| chr5 | 15057293 | 15057294 | chr5 | 15050505 | 1507959  | L1MA5       | LINE    | L1          |
| chr5 | 15077963 | 15077964 | chr5 | 15076890 | 15078610 | MSTD-int    | LTR     | ERVL-MaLR   |
| chr5 | 15103414 | 15103415 | .    | .        | .        | .           | .       | .           |
| chr5 | 15132202 | 15132203 | chr5 | 15126664 | 15133381 | L1PA15      | LINE    | L1          |
| chr5 | 15155439 | 15155440 | .    | .        | .        | .           | .       | .           |
| chr5 | 15174112 | 15174113 | chr5 | 15173573 | 15179065 | L1M1        | LINE    | L1          |
| chr5 | 15270032 | 15270033 | chr5 | 15269646 | 15270121 | MLT1F2      | LTR     | ERVL-MaLR   |
| chr5 | 15451627 | 15451628 | .    | .        | .        | .           | .       | .           |
| chr5 | 15492841 | 15492842 | chr5 | 15492815 | 15492915 | MLT1J1      | LTR     | ERVL-MaLR   |
| chr5 | 15793110 | 15793111 | .    | .        | .        | .           | .       | .           |
| chr5 | 16204295 | 16204296 | .    | .        | .        | .           | .       | .           |
| chr5 | 16403388 | 16403389 | chr5 | 16403077 | 16403501 | MSTA        | LTR     | ERVL-MaLR   |
| chr5 | 16505878 | 16505879 | .    | .        | .        | .           | .       | .           |
| chr5 | 16690660 | 16690661 | .    | .        | .        | .           | .       | .           |
| chr5 | 16701317 | 16701318 | .    | .        | .        | .           | .       | .           |
| chr5 | 16785301 | 16785302 | .    | .        | .        | .           | .       | .           |
| chr5 | 16790426 | 16790427 | .    | .        | .        | .           | .       | .           |
| chr5 | 16812486 | 16812487 | .    | .        | .        | .           | .       | .           |
| chr5 | 16820402 | 16820403 | .    | .        | .        | .           | .       | .           |
| chr5 | 16886042 | 16886043 | .    | .        | .        | .           | .       | .           |
| chr5 | 16906496 | 16906497 | chr5 | 16906424 | 16906609 | MER20       | DNA     | hAT-Charlie |
| chr5 | 16965115 | 16965116 | .    | .        | .        | .           | .       | .           |
| chr5 | 16983365 | 16983366 | .    | .        | .        | .           | .       | .           |
| chr5 | 17181974 | 17181975 | .    | .        | .        | .           | .       | .           |
| chr5 | 17232730 | 17232731 | .    | .        | .        | .           | .       | .           |
| chr5 | 17241797 | 17241798 | .    | .        | .        | .           | .       | .           |
| chr5 | 17252185 | 17252186 | chr5 | 17251741 | 17252204 | L2          | LINE    | L2          |
| chr5 | 17279324 | 17279325 | .    | .        | .        | .           | .       | .           |
| chr5 | 17287954 | 17287955 | .    | .        | .        | .           | .       | .           |
| chr5 | 17300597 | 17300598 | .    | .        | .        | .           | .       | .           |
| chr5 | 17316872 | 17316873 | .    | .        | .        | .           | .       | .           |
| chr5 | 17368254 | 17368255 | .    | .        | .        | .           | .       | .           |
| chr5 | 17380423 | 17380424 | chr5 | 17380281 | 17380486 | MamRep605   | Unknown | Unknown     |
| chr5 | 17413095 | 17413096 | chr5 | 17412942 | 17413389 | LTR16B1     | LTR     | ERVL        |
| chr5 | 17512427 | 17512428 | .    | .        | .        | .           | .       | .           |
| chr5 | 17517843 | 17517844 | .    | .        | .        | .           | .       | .           |
| chr5 | 17526849 | 17526850 | .    | .        | .        | .           | .       | .           |
| chr5 | 17625918 | 17625919 | .    | .        | .        | .           | .       | .           |
| chr5 | 17655836 | 17655837 | .    | .        | .        | .           | .       | .           |
| chr5 | 17772625 | 17772626 | chr5 | 17772314 | 17773009 | L1MDa       | LINE    | L1          |
| chr5 | 17786272 | 17786273 | .    | .        | .        | .           | .       | .           |
| chr5 | 17790280 | 17790281 | .    | .        | .        | .           | .       | .           |
| chr5 | 17845232 | 17845233 | chr5 | 17844338 | 17845549 | L1PA12      | LINE    | L1          |
| chr5 | 17886114 | 17886115 | chr5 | 17885002 | 17886282 | THE18-int   | LTR     | ERVL-MaLR   |
| chr5 | 18198091 | 18198092 | chr5 | 18197342 | 18198958 | MST-int     | LTR     | ERVL-MaLR   |
| chr5 | 18483828 | 18483829 | chr5 | 18483701 | 18483873 | L1M6        | LINE    | L1          |
| chr5 | 18496288 | 18496289 | chr5 | 18495898 | 18497045 | L1MDa       | LINE    | L1          |
| chr5 | 18564283 | 18564284 | chr5 | 18564086 | 18564556 | LTR56       | LTR     | ERV1        |
| chr5 | 18947424 | 18947425 | chr5 | 18947064 | 18952908 | L1MA4A      | LINE    | L1          |
| chr5 | 19045190 | 19045191 | chr5 | 19044485 | 19046003 | L1Pba       | LINE    | L1          |
| chr5 | 19184717 | 19184718 | chr5 | 19184198 | 19187174 | L1PA15.6    | LINE    | L1          |
| chr5 | 19200384 | 19200385 | .    | .        | .        | .           | .       | .           |
| chr5 | 19209696 | 19209697 | chr5 | 19208543 | 19210083 | MERS2A      | LTR     | ERV1        |



|      |          |          |      |          |          |              |             |               |
|------|----------|----------|------|----------|----------|--------------|-------------|---------------|
| chr5 | 30070338 | 30070339 | chr5 | 30069262 | 30070533 | L1PA13       | LINE        | L1            |
| chr5 | 30106578 | 30106579 | chr5 | 30106113 | 30106965 | LTR1D        | LTR         | ERV1          |
| chr5 | 30125995 | 30125996 | .    | .        | .        | .            | .           | .             |
| chr5 | 30161288 | 30161289 | chr5 | 30161048 | 30161639 | MERS1A       | LTR         | ERV1          |
| chr5 | 30173050 | 30173051 | chr5 | 30172847 | 30173303 | MLT1C        | LTR         | ERV1-MaLR     |
| chr5 | 30226814 | 30226815 | .    | .        | .        | .            | .           | .             |
| chr5 | 30289144 | 30289145 | chr5 | 30288728 | 30289184 | L1M2         | LINE        | L1            |
| chr5 | 30393210 | 30393211 | chr5 | 30392901 | 30393428 | MLT1G        | LTR         | ERV1-MaLR     |
| chr5 | 30457217 | 30457218 | .    | .        | .        | .            | .           | .             |
| chr5 | 30539807 | 30539808 | chr5 | 30538998 | 30541305 | L1MA3        | LINE        | L1            |
| chr5 | 30687861 | 30687862 | .    | .        | .        | .            | .           | .             |
| chr5 | 30701243 | 30701244 | chr5 | 30700354 | 30701948 | THE1C-int    | LTR         | ERV1-MaLR     |
| chr5 | 30857316 | 30857317 | .    | .        | .        | .            | .           | .             |
| chr5 | 30942175 | 30942176 | .    | .        | .        | .            | .           | .             |
| chr5 | 30992648 | 30992649 | chr5 | 30992476 | 30992870 | MLT1C        | LTR         | ERV1-MaLR     |
| chr5 | 31087142 | 31087143 | .    | .        | .        | .            | .           | .             |
| chr5 | 31273659 | 31273660 | .    | .        | .        | .            | .           | .             |
| chr5 | 31294378 | 31294379 | .    | .        | .        | .            | .           | .             |
| chr5 | 31317979 | 31317980 | .    | .        | .        | .            | .           | .             |
| chr5 | 31496045 | 31496046 | .    | .        | .        | .            | .           | .             |
| chr5 | 31503736 | 31503737 | .    | .        | .        | .            | .           | .             |
| chr5 | 31513365 | 31513366 | .    | .        | .        | .            | .           | .             |
| chr5 | 31559281 | 31559282 | chr5 | 31559249 | 31559334 | MIRb         | SINE        | MIR           |
| chr5 | 31630913 | 31630914 | chr5 | 31630743 | 31630985 | L2b          | LINE        | L2            |
| chr5 | 31672369 | 31672370 | chr5 | 31672293 | 31672452 | MERSA1       | DNA         | hAT-Charlie   |
| chr5 | 31782105 | 31782106 | .    | .        | .        | .            | .           | .             |
| chr5 | 31855631 | 31855632 | .    | .        | .        | .            | .           | .             |
| chr5 | 31860764 | 31860765 | .    | .        | .        | .            | .           | .             |
| chr5 | 31981773 | 31981774 | .    | .        | .        | .            | .           | .             |
| chr5 | 31988179 | 31988180 | .    | .        | .        | .            | .           | .             |
| chr5 | 32003113 | 32003114 | chr5 | 32002673 | 32003186 | (CA)n        | Simple_repe | Simple_repeat |
| chr5 | 32037118 | 32037119 | .    | .        | .        | .            | .           | .             |
| chr5 | 32089523 | 32089524 | .    | .        | .        | .            | .           | .             |
| chr5 | 32101142 | 32101143 | .    | .        | .        | .            | .           | .             |
| chr5 | 32168763 | 32168764 | .    | .        | .        | .            | .           | .             |
| chr5 | 32204053 | 32204054 | chr5 | 32203840 | 32204608 | MERS4A       | LTR         | ERVL          |
| chr5 | 32330001 | 32330002 | .    | .        | .        | .            | .           | .             |
| chr5 | 32512318 | 32512319 | .    | .        | .        | .            | .           | .             |
| chr5 | 32553216 | 32553217 | chr5 | 32552435 | 32553429 | LTR12D       | LTR         | ERV1          |
| chr5 | 32640627 | 32640628 | .    | .        | .        | .            | .           | .             |
| chr5 | 32704201 | 32704202 | chr5 | 32703137 | 32704476 | L1MA3        | LINE        | L1            |
| chr5 | 32768138 | 32768139 | .    | .        | .        | .            | .           | .             |
| chr5 | 32793817 | 32793818 | .    | .        | .        | .            | .           | .             |
| chr5 | 32890029 | 32890030 | chr5 | 32889799 | 32890309 | MLT1F        | LTR         | ERV1-MaLR     |
| chr5 | 33015109 | 33015110 | chr5 | 33013764 | 33015674 | L1M3c        | LINE        | L1            |
| chr5 | 33042159 | 33042160 | .    | .        | .        | .            | .           | .             |
| chr5 | 33050347 | 33050348 | chr5 | 33049132 | 33051388 | L1M2a        | LINE        | L1            |
| chr5 | 33092902 | 33092903 | chr5 | 33091741 | 33093779 | L1PA16       | LINE        | L1            |
| chr5 | 33166519 | 33166520 | chr5 | 33164561 | 33167892 | L1PBa        | LINE        | L1            |
| chr5 | 33313466 | 33313467 | chr5 | 33313143 | 33313575 | MERS7D       | LTR         | ERV1          |
| chr5 | 33370497 | 33370498 | .    | .        | .        | .            | .           | .             |
| chr5 | 33428636 | 33428637 | chr5 | 33426424 | 33428958 | L1PA15       | LINE        | L1            |
| chr5 | 33458045 | 33458046 | .    | .        | .        | .            | .           | .             |
| chr5 | 33470780 | 33470781 | .    | .        | .        | .            | .           | .             |
| chr5 | 33671932 | 33671933 | chr5 | 33671921 | 33672284 | (CA)n        | Simple_repe | Simple_repeat |
| chr5 | 34035367 | 34035368 | .    | .        | .        | .            | .           | .             |
| chr5 | 34497341 | 34497342 | .    | .        | .        | .            | .           | .             |
| chr5 | 34504197 | 34504198 | .    | .        | .        | .            | .           | .             |
| chr5 | 34532357 | 34532358 | chr5 | 34532239 | 34532469 | MER115       | DNA         | hAT-Tip100    |
| chr5 | 34666416 | 34666417 | .    | .        | .        | .            | .           | .             |
| chr5 | 35303488 | 35303489 | .    | .        | .        | .            | .           | .             |
| chr5 | 35325041 | 35325042 | chr5 | 35323875 | 35330589 | L1PA13       | LINE        | L1            |
| chr5 | 35625878 | 35625879 | .    | .        | .        | .            | .           | .             |
| chr5 | 35651324 | 35651325 | chr5 | 35650934 | 35651397 | MLT1J        | LTR         | ERV1-MaLR     |
| chr5 | 35708770 | 35708771 | chr5 | 35708658 | 35708838 | HAL1-2a_MD   | LINE        | L1            |
| chr5 | 35753993 | 35753994 | .    | .        | .        | .            | .           | .             |
| chr5 | 35810866 | 35810867 | .    | .        | .        | .            | .           | .             |
| chr5 | 35822882 | 35822883 | .    | .        | .        | .            | .           | .             |
| chr5 | 35901195 | 35901196 | .    | .        | .        | .            | .           | .             |
| chr5 | 35919902 | 35919903 | .    | .        | .        | .            | .           | .             |
| chr5 | 35946268 | 35946269 | .    | .        | .        | .            | .           | .             |
| chr5 | 36444656 | 36444657 | chr5 | 36444522 | 36444927 | LTR16C       | LTR         | ERVL          |
| chr5 | 36488319 | 36488320 | chr5 | 36488197 | 36488397 | MLT1J        | LTR         | ERV1-MaLR     |
| chr5 | 36502856 | 36502857 | chr5 | 36502770 | 36502903 | AmnSINE1     | SINE        | Deu           |
| chr5 | 36522170 | 36522171 | .    | .        | .        | .            | .           | .             |
| chr5 | 36584131 | 36584132 | .    | .        | .        | .            | .           | .             |
| chr5 | 36935172 | 36935173 | chr5 | 36935075 | 36935399 | L2b          | LINE        | L2            |
| chr5 | 37233443 | 37233444 | chr5 | 37233066 | 37234935 | L1M2         | LINE        | L1            |
| chr5 | 37630287 | 37630288 | chr5 | 37628324 | 37631370 | L1MA5A       | LINE        | L1            |
| chr5 | 37666126 | 37666127 | .    | .        | .        | .            | .           | .             |
| chr5 | 37685743 | 37685744 | chr5 | 37680094 | 37686154 | L1PA11       | LINE        | L1            |
| chr5 | 37755927 | 37755928 | .    | .        | .        | .            | .           | .             |
| chr5 | 37889564 | 37889565 | .    | .        | .        | .            | .           | .             |
| chr5 | 38273585 | 38273586 | chr5 | 38273047 | 38273644 | L1MA8        | LINE        | L1            |
| chr5 | 38322411 | 38322412 | chr5 | 38321909 | 38322591 | MER115       | DNA         | hAT-Tip100    |
| chr5 | 38409597 | 38409598 | .    | .        | .        | .            | .           | .             |
| chr5 | 38426995 | 38426996 | chr5 | 38426647 | 38427077 | MLT1J2       | LTR         | ERV1-MaLR     |
| chr5 | 38493111 | 38493112 | .    | .        | .        | .            | .           | .             |
| chr5 | 38521908 | 38521909 | chr5 | 38521577 | 38522252 | L1MA4A       | LINE        | L1            |
| chr5 | 38665802 | 38665803 | .    | .        | .        | .            | .           | .             |
| chr5 | 38865995 | 38865996 | chr5 | 38863650 | 38867218 | L1MA4A       | LINE        | L1            |
| chr5 | 38908545 | 38908546 | chr5 | 38907241 | 38910830 | L1PA16       | LINE        | L1            |
| chr5 | 38933699 | 38933700 | .    | .        | .        | .            | .           | .             |
| chr5 | 39092608 | 39092609 | chr5 | 39092463 | 39092675 | MLT2E        | LTR         | ERVL          |
| chr5 | 39226309 | 39226310 | .    | .        | .        | .            | .           | .             |
| chr5 | 39259466 | 39259467 | .    | .        | .        | .            | .           | .             |
| chr5 | 39370891 | 39370892 | .    | .        | .        | .            | .           | .             |
| chr5 | 39376713 | 39376714 | .    | .        | .        | .            | .           | .             |
| chr5 | 39397084 | 39397085 | chr5 | 39397005 | 39397621 | LTR50        | LTR         | ERVL          |
| chr5 | 39448893 | 39448894 | chr5 | 39448590 | 39449147 | MLT2B3       | LTR         | ERVL          |
| chr5 | 39565513 | 39565514 | .    | .        | .        | .            | .           | .             |
| chr5 | 39586857 | 39586858 | chr5 | 39586232 | 39587058 | LTR1         | LTR         | ERV1          |
| chr5 | 39654809 | 39654810 | chr5 | 39654692 | 39654878 | HUERS-P3b-ii | LTR         | ERV1          |
| chr5 | 39656441 | 39656442 | .    | .        | .        | .            | .           | .             |
| chr5 | 39868331 | 39868332 | chr5 | 39867721 | 39868332 | L2a          | LINE        | L2            |
| chr5 | 40165548 | 40165549 | chr5 | 40164850 | 40167715 | L1PA16       | LINE        | L1            |
| chr5 | 40509808 | 40509809 | .    | .        | .        | .            | .           | .             |



|      |           |           |      |           |           |                |                           |             |
|------|-----------|-----------|------|-----------|-----------|----------------|---------------------------|-------------|
| chr5 | 41095117  | 41095118  | chr5 | 41095013  | 41095410  | MLT1J          | LTR                       | ERVL-MaLR   |
| chr5 | 41124660  | 41124661  | .    | .         | .         | .              | .                         | .           |
| chr5 | 41141080  | 41141081  | .    | .         | .         | .              | .                         | .           |
| chr5 | 41149005  | 41149006  | chr5 | 41148948  | 41149108  | FordPrefect    | DNA                       | hAT-Tip100  |
| chr5 | 41241202  | 41241203  | chr5 | 41240282  | 41241389  | L1M2           | LINE                      | L1          |
| chr5 | 41291271  | 41291272  | chr5 | 41290066  | 41291451  | MERS2A         | LTR                       | ERV1        |
| chr5 | 41336878  | 41336879  | chr5 | 41336637  | 41337055  | LTR16A         | LTR                       | ERVL        |
| chr5 | 41541637  | 41541638  | chr5 | 41540421  | 41542620  | L1PA15.6       | LINE                      | L1          |
| chr5 | 41650536  | 41650537  | .    | .         | .         | .              | .                         | .           |
| chr5 | 41696906  | 41696907  | chr5 | 41694059  | 41697490  | L1PB4          | LINE                      | L1          |
| chr5 | 41856584  | 41856585  | .    | .         | .         | .              | .                         | .           |
| chr5 | 42454760  | 42454761  | chr5 | 42454523  | 42455523  | L1PBa          | LINE                      | L1          |
| chr5 | 42583021  | 42583022  | chr5 | 42581818  | 42583247  | MERS2D         | LTR                       | ERV1        |
| chr5 | 42972357  | 42972358  | chr5 | 42972201  | 42972536  | MER1B          | DNA                       | hAT-Charlie |
| chr5 | 42986118  | 42986119  | chr5 | 42985951  | 42986366  | MSTA           | LTR                       | ERVL-MaLR   |
| chr5 | 42993383  | 42993384  | .    | .         | .         | .              | .                         | .           |
| chr5 | 43007739  | 43007740  | chr5 | 43007714  | 43008125  | MER61D         | LTR                       | ERV1        |
| chr5 | 43075510  | 43075511  | chr5 | 43075366  | 43075775  | MER48          | LTR                       | ERV1        |
| chr5 | 43096326  | 43096327  | .    | .         | .         | .              | .                         | .           |
| chr5 | 43105747  | 43105748  | .    | .         | .         | .              | .                         | .           |
| chr5 | 43174933  | 43174934  | .    | .         | .         | .              | .                         | .           |
| chr5 | 43233127  | 43233128  | .    | .         | .         | .              | .                         | .           |
| chr5 | 43631483  | 43631484  | .    | .         | .         | .              | .                         | .           |
| chr5 | 43769841  | 43769842  | .    | .         | .         | .              | .                         | .           |
| chr5 | 44219157  | 44219158  | chr5 | 44219105  | 44219328  | LTR33B         | LTR                       | ERVL        |
| chr5 | 44553457  | 44553458  | chr5 | 44553292  | 44554721  | L1M1           | LINE                      | L1          |
| chr5 | 44638627  | 44638628  | chr5 | 44638600  | 44638884  | LTR53          | LTR                       | ERVL        |
| chr5 | 45262325  | 45262326  | .    | .         | .         | .              | .                         | .           |
| chr5 | 45827585  | 45827586  | .    | .         | .         | .              | .                         | .           |
| chr5 | 49405908  | 49405909  | chr5 | 49405641  | 49431170  | ALR/Alpha      | Satellite                 | centr       |
| chr5 | 49440087  | 49440088  | chr5 | 49438846  | 49441620  | ALR/Alpha      | Satellite                 | centr       |
| chr5 | 49450626  | 49450627  | chr5 | 49447717  | 49451978  | ALR/Alpha      | Satellite                 | centr       |
| chr5 | 58187593  | 58187594  | .    | .         | .         | .              | .                         | .           |
| chr5 | 61390031  | 61390032  | .    | .         | .         | .              | .                         | .           |
| chr5 | 65703207  | 65703208  | .    | .         | .         | .              | .                         | .           |
| chr5 | 66564484  | 66564485  | .    | .         | .         | .              | .                         | .           |
| chr5 | 71146773  | 71146774  | chr5 | 71146744  | 71146942  | LSU-rRNA_HrRNA | rRNA                      | .           |
| chr5 | 71183674  | 71183675  | chr5 | 71183425  | 71183840  | MLT1J          | LTR                       | ERVL-MaLR   |
| chr5 | 71604364  | 71604365  | .    | .         | .         | .              | .                         | .           |
| chr5 | 72484949  | 72484950  | chr5 | 72484576  | 72485051  | MLT1J          | LTR                       | ERVL-MaLR   |
| chr5 | 73969409  | 73969410  | chr5 | 73969337  | 73969520  | LTR67B         | LTR                       | ERVL        |
| chr5 | 73969409  | 73969410  | chr5 | 73969402  | 73969624  | MLTIN2         | LTR                       | ERVL-MaLR   |
| chr5 | 76164089  | 76164090  | .    | .         | .         | .              | .                         | .           |
| chr5 | 88552105  | 88552106  | chr5 | 88551834  | 88552211  | MLT1J2         | LTR                       | ERVL-MaLR   |
| chr5 | 92641826  | 92641827  | chr5 | 92641698  | 92642200  | LTR33B         | LTR                       | ERVL        |
| chr5 | 92868285  | 92868286  | .    | .         | .         | .              | .                         | .           |
| chr5 | 102434899 | 102434900 | chr5 | 102434840 | 102435024 | MLT1J          | LTR                       | ERVL-MaLR   |
| chr5 | 111564491 | 111564492 | .    | .         | .         | .              | .                         | .           |
| chr5 | 114755754 | 114755755 | chr5 | 114755382 | 114755856 | MLT1J          | LTR                       | ERVL-MaLR   |
| chr5 | 125367840 | 125367841 | chr5 | 125367804 | 125368013 | LTR16D2        | LTR                       | ERVL        |
| chr5 | 131526050 | 131526051 | chr5 | 131525954 | 131526120 | LTR50          | LTR                       | ERVL        |
| chr5 | 131590260 | 131590261 | .    | .         | .         | .              | .                         | .           |
| chr5 | 134260269 | 134260270 | .    | .         | .         | .              | .                         | .           |
| chr5 | 137968873 | 137968874 | chr5 | 137968816 | 137968921 | MLT1J          | LTR                       | ERVL-MaLR   |
| chr5 | 138897632 | 138897633 | .    | .         | .         | .              | .                         | .           |
| chr5 | 141126817 | 141126818 | .    | .         | .         | .              | .                         | .           |
| chr5 | 142488400 | 142488401 | .    | .         | .         | .              | .                         | .           |
| chr5 | 147278896 | 147278897 | .    | .         | .         | .              | .                         | .           |
| chr5 | 148779504 | 148779505 | chr5 | 148779425 | 148779606 | LTR67B         | LTR                       | ERVL        |
| chr5 | 149643040 | 149643041 | chr5 | 149642894 | 149643245 | (CA)n          | Simple_repe:Simple_repeat | .           |
| chr5 | 153211706 | 153211707 | chr5 | 153211660 | 153211836 | MLT1J1         | LTR                       | ERVL-MaLR   |
| chr5 | 154136733 | 154136734 | .    | .         | .         | .              | .                         | .           |
| chr5 | 157476629 | 157476630 | chr5 | 157476620 | 157476998 | MLT1J2         | LTR                       | ERVL-MaLR   |
| chr5 | 157640122 | 157640123 | chr5 | 157640015 | 157640462 | MLT1J2         | LTR                       | ERVL-MaLR   |
| chr5 | 159592329 | 159592330 | .    | .         | .         | .              | .                         | .           |
| chr5 | 168447305 | 168447306 | chr5 | 168447215 | 168447642 | MLT1J1         | LTR                       | ERVL-MaLR   |
| chr5 | 168587795 | 168587796 | .    | .         | .         | .              | .                         | .           |
| chr5 | 171730835 | 171730836 | chr5 | 171730713 | 171730842 | MLT1A0         | LTR                       | ERVL-MaLR   |
| chr5 | 171864497 | 171864498 | chr5 | 171864431 | 171864568 | MIRb           | SINE                      | MIR         |
| chr5 | 171930146 | 171930147 | chr5 | 171930129 | 171930424 | MLT1J2         | LTR                       | ERVL-MaLR   |
| chr5 | 172332189 | 172332190 | .    | .         | .         | .              | .                         | .           |
| chr5 | 172347175 | 172347176 | .    | .         | .         | .              | .                         | .           |
| chr5 | 172710938 | 172710939 | .    | .         | .         | .              | .                         | .           |
| chr5 | 173751098 | 173751099 | .    | .         | .         | .              | .                         | .           |
| chr5 | 173959650 | 173959651 | chr5 | 173959516 | 173959655 | MIR            | SINE                      | MIR         |
| chr5 | 175174013 | 175174014 | chr5 | 175173888 | 175174400 | MLT1J          | LTR                       | ERVL-MaLR   |
| chr5 | 178012696 | 178012697 | .    | .         | .         | .              | .                         | .           |
| chr5 | 179189141 | 179189142 | .    | .         | .         | .              | .                         | .           |
| chr6 | 6891003   | 6891004   | chr6 | 6890626   | 6891066   | LTR33A         | LTR                       | ERVL        |
| chr6 | 10147396  | 10147397  | chr6 | 10147359  | 10147434  | L1M6           | LINE                      | L1          |
| chr6 | 10404887  | 10404888  | .    | .         | .         | .              | .                         | .           |
| chr6 | 14800293  | 14800294  | chr6 | 14800206  | 14800434  | MLT1J          | LTR                       | ERVL-MaLR   |
| chr6 | 20000045  | 20000046  | chr6 | 20000011  | 20000385  | MLT1J1         | LTR                       | ERVL-MaLR   |
| chr6 | 21588594  | 21588595  | .    | .         | .         | .              | .                         | .           |
| chr6 | 33553779  | 33553780  | .    | .         | .         | .              | .                         | .           |
| chr6 | 33783849  | 33783850  | chr6 | 33783434  | 33783922  | LTR33A         | LTR                       | ERVL        |
| chr6 | 34039729  | 34039730  | chr6 | 34039536  | 34039802  | (CA)n          | Simple_repe:Simple_repeat | .           |
| chr6 | 36270392  | 36270393  | .    | .         | .         | .              | .                         | .           |
| chr6 | 43215052  | 43215053  | .    | .         | .         | .              | .                         | .           |
| chr6 | 44020369  | 44020370  | chr6 | 44020274  | 44020498  | LTR67B         | LTR                       | ERVL        |
| chr6 | 44101557  | 44101558  | .    | .         | .         | .              | .                         | .           |
| chr6 | 47285286  | 47285287  | chr6 | 47285229  | 47285358  | MLT1J          | LTR                       | ERVL-MaLR   |
| chr6 | 52379503  | 52379504  | .    | .         | .         | .              | .                         | .           |
| chr6 | 58779083  | 58779084  | chr6 | 58775920  | 58780161  | ALR/Alpha      | Satellite                 | centr       |
| chr6 | 64308713  | 64308714  | chr6 | 64308320  | 64308880  | LTR33C         | LTR                       | ERVL        |
| chr6 | 74847954  | 74847955  | chr6 | 74847521  | 74847987  | LTR33B         | LTR                       | ERVL        |
| chr6 | 80889602  | 80889603  | chr6 | 80889537  | 80889628  | MLT1J          | LTR                       | ERVL-MaLR   |
| chr6 | 89745208  | 89745209  | .    | .         | .         | .              | .                         | .           |
| chr6 | 106040488 | 106040489 | .    | .         | .         | .              | .                         | .           |
| chr6 | 108038002 | 108038003 | chr6 | 108037924 | 108038074 | MLT1J          | LTR                       | ERVL-MaLR   |
| chr6 | 109010653 | 109010654 | .    | .         | .         | .              | .                         | .           |
| chr6 | 119558597 | 119558598 | .    | .         | .         | .              | .                         | .           |
| chr6 | 134159104 | 134159105 | .    | .         | .         | .              | .                         | .           |
| chr6 | 150401000 | 150401001 | chr6 | 150400886 | 150401139 | LTR67B         | LTR                       | ERVL        |
| chr6 | 159495543 | 159495544 | chr6 | 159495216 | 159495679 | MLT1J          | LTR                       | ERVL-MaLR   |
| chr6 | 163591539 | 163591540 | .    | .         | .         | .              | .                         | .           |
| chr6 | 167000407 | 167000408 | chr6 | 167000379 | 167000474 | MLT1J2         | LTR                       | ERVL-MaLR   |



|      |           |           |      |           |           |            |                           |           |
|------|-----------|-----------|------|-----------|-----------|------------|---------------------------|-----------|
| chr8 | 133132747 | 133132748 | chr8 | 133132706 | 133133039 | MLT1J2     | LTR                       | ERVL-MaLR |
| chr8 | 134403360 | 134403361 | chr8 | 134403166 | 134403666 | MLT1J      | LTR                       | ERVL-MaLR |
| chr8 | 135346413 | 135346414 | chr8 | 135346371 | 135346727 | MLT1J1     | LTR                       | ERVL-MaLR |
| chr8 | 140688105 | 140688106 | chr8 | 140688056 | 140688474 | MLT1J2     | LTR                       | ERVL-MaLR |
| chr8 | 145180781 | 145180782 | .    | .         | .         | .          | .                         | .         |
| chr8 | 145634763 | 145634764 | .    | .         | .         | .          | .                         | .         |
| chr8 | 145911385 | 145911386 | .    | .         | .         | .          | .                         | .         |
| chr8 | 146071405 | 146071406 | .    | .         | .         | .          | .                         | .         |
| chr9 | 326889    | 326890    | chr9 | 326603    | 326925    | MLT1J1     | LTR                       | ERVL-MaLR |
| chr9 | 1722641   | 1722642   | chr9 | 1722352   | 1722694   | MLT1J2     | LTR                       | ERVL-MaLR |
| chr9 | 4081361   | 4081362   | .    | .         | .         | .          | .                         | .         |
| chr9 | 4713988   | 4713989   | chr9 | 4713888   | 4714195   | (CA)n      | Simple_repe:Simple_repeat |           |
| chr9 | 7243687   | 7243688   | chr9 | 7243662   | 7243700   | LTR67B     | LTR                       | ERVL      |
| chr9 | 7243687   | 7243688   | chr9 | 7243662   | 7243693   | MLT1J      | LTR                       | ERVL-MaLR |
| chr9 | 7320277   | 7320278   | .    | .         | .         | .          | .                         | .         |
| chr9 | 14029875  | 14029876  | .    | .         | .         | .          | .                         | .         |
| chr9 | 16705418  | 16705419  | .    | .         | .         | .          | .                         | .         |
| chr9 | 17614973  | 17614974  | chr9 | 17614923  | 17615019  | LTR86B2    | LTR                       | ERVL      |
| chr9 | 18373822  | 18373823  | .    | .         | .         | .          | .                         | .         |
| chr9 | 18531298  | 18531299  | chr9 | 18530958  | 18531603  | MamRep605  | Unknown                   | Unknown   |
| chr9 | 20684816  | 20684817  | .    | .         | .         | .          | .                         | .         |
| chr9 | 21527928  | 21527929  | chr9 | 21527665  | 21528917  | L1PA13     | LINE                      | L1        |
| chr9 | 21536368  | 21536369  | .    | .         | .         | .          | .                         | .         |
| chr9 | 22012337  | 22012338  | .    | .         | .         | .          | .                         | .         |
| chr9 | 22215567  | 22215568  | .    | .         | .         | .          | .                         | .         |
| chr9 | 33101387  | 33101388  | .    | .         | .         | .          | .                         | .         |
| chr9 | 34049471  | 34049472  | .    | .         | .         | .          | .                         | .         |
| chr9 | 34074396  | 34074397  | .    | .         | .         | .          | .                         | .         |
| chr9 | 35110687  | 35110688  | .    | .         | .         | .          | .                         | .         |
| chr9 | 35646864  | 35646865  | .    | .         | .         | .          | .                         | .         |
| chr9 | 36764077  | 36764078  | chr9 | 36764012  | 36764182  | (TG)n      | Simple_repe:Simple_repeat |           |
| chr9 | 37920567  | 37920568  | chr9 | 37920471  | 37920623  | MLT1J1     | LTR                       | ERVL-MaLR |
| chr9 | 44877991  | 44877992  | chr9 | 44877633  | 44878926  | SST1       | Satellite                 | centr     |
| chr9 | 44993217  | 44993218  | chr9 | 44993212  | 44994530  | SST1       | Satellite                 | centr     |
| chr9 | 66457434  | 66457435  | .    | .         | .         | .          | .                         | .         |
| chr9 | 66833168  | 66833169  | chr9 | 66832948  | 66836542  | ALR/Alpha  | Satellite                 | centr     |
| chr9 | 66858208  | 66858209  | chr9 | 66858041  | 66863340  | CER        | Satellite                 | Satellite |
| chr9 | 68412518  | 68412519  | .    | .         | .         | .          | .                         | .         |
| chr9 | 68419488  | 68419489  | chr9 | 68419062  | 68419642  | (CA)n      | Simple_repe:Simple_repeat |           |
| chr9 | 68424061  | 68424062  | .    | .         | .         | .          | .                         | .         |
| chr9 | 68425704  | 68425705  | .    | .         | .         | .          | .                         | .         |
| chr9 | 69982837  | 69982838  | chr9 | 69948085  | 70000000  | ALR/Alpha  | Satellite                 | centr     |
| chr9 | 72653280  | 72653281  | chr9 | 72653081  | 72653393  | (GAATG)n   | Satellite                 | Satellite |
| chr9 | 73216271  | 73216272  | .    | .         | .         | .          | .                         | .         |
| chr9 | 77805938  | 77805939  | chr9 | 77805767  | 77805967  | LTR33B     | LTR                       | ERVL      |
| chr9 | 79186686  | 79186687  | chr9 | 79186648  | 79186950  | LSU-rRNA_H | rRNA                      | rRNA      |
| chr9 | 79631159  | 79631160  | .    | .         | .         | .          | .                         | .         |
| chr9 | 90060733  | 90060734  | chr9 | 90060621  | 90061102  | MLT1J      | LTR                       | ERVL-MaLR |
| chr9 | 95834045  | 95834046  | chr9 | 95833974  | 95834101  | MLT1J      | LTR                       | ERVL-MaLR |
| chr9 | 99638243  | 99638244  | .    | .         | .         | .          | .                         | .         |
| chr9 | 100904682 | 100904683 | .    | .         | .         | .          | .                         | .         |
| chr9 | 102057318 | 102057319 | chr9 | 102057209 | 102057495 | MLT1J      | LTR                       | ERVL-MaLR |
| chr9 | 103174075 | 103174076 | .    | .         | .         | .          | .                         | .         |
| chr9 | 107730622 | 107730623 | .    | .         | .         | .          | .                         | .         |
| chr9 | 111003835 | 111003836 | chr9 | 111003690 | 111003922 | MLT1J1     | LTR                       | ERVL-MaLR |
| chr9 | 112505552 | 112505553 | chr9 | 112505077 | 112505736 | L1M6       | LINE                      | L1        |
| chr9 | 117731696 | 117731697 | chr9 | 117731678 | 117732155 | MLT1J      | LTR                       | ERVL-MaLR |
| chr9 | 121094006 | 121094007 | .    | .         | .         | .          | .                         | .         |
| chr9 | 122914773 | 122914774 | .    | .         | .         | .          | .                         | .         |
| chr9 | 123295015 | 123295016 | .    | .         | .         | .          | .                         | .         |
| chr9 | 123322712 | 123322713 | .    | .         | .         | .          | .                         | .         |
| chr9 | 123484053 | 123484054 | .    | .         | .         | .          | .                         | .         |
| chr9 | 123837050 | 123837051 | .    | .         | .         | .          | .                         | .         |
| chr9 | 124089162 | 124089163 | .    | .         | .         | .          | .                         | .         |
| chr9 | 124308515 | 124308516 | .    | .         | .         | .          | .                         | .         |
| chr9 | 127533687 | 127533688 | .    | .         | .         | .          | .                         | .         |
| chr9 | 127581051 | 127581052 | .    | .         | .         | .          | .                         | .         |
| chr9 | 129066051 | 129066052 | chr9 | 129065749 | 129066084 | MLT1J1     | LTR                       | ERVL-MaLR |
| chr9 | 129551156 | 129551157 | chr9 | 129551052 | 129551188 | LTR33C     | LTR                       | ERVL      |
| chr9 | 129933215 | 129933216 | .    | .         | .         | .          | .                         | .         |
| chr9 | 130007477 | 130007478 | .    | .         | .         | .          | .                         | .         |
| chr9 | 130597899 | 130597900 | .    | .         | .         | .          | .                         | .         |
| chr9 | 130652825 | 130652826 | .    | .         | .         | .          | .                         | .         |
| chr9 | 131397753 | 131397754 | .    | .         | .         | .          | .                         | .         |
| chr9 | 131938308 | 131938309 | .    | .         | .         | .          | .                         | .         |
| chr9 | 131965240 | 131965241 | .    | .         | .         | .          | .                         | .         |
| chr9 | 132031111 | 132031112 | chr9 | 132031034 | 132031469 | MLT1J2     | LTR                       | ERVL-MaLR |
| chr9 | 132079969 | 132079970 | chr9 | 132079897 | 132080312 | MLT1J2     | LTR                       | ERVL-MaLR |
| chr9 | 132096136 | 132096137 | chr9 | 132095992 | 132096293 | L2b        | LINE                      | L2        |
| chr9 | 132102361 | 132102362 | chr9 | 132102304 | 132102487 | (TG)n      | Simple_repe:Simple_repeat |           |
| chr9 | 132177092 | 132177093 | .    | .         | .         | .          | .                         | .         |
| chr9 | 132196739 | 132196740 | chr9 | 132196382 | 132196777 | MLT1J      | LTR                       | ERVL-MaLR |
| chr9 | 132196739 | 132196740 | chr9 | 132196707 | 132196836 | LTR67B     | LTR                       | ERVL      |
| chr9 | 132258463 | 132258464 | .    | .         | .         | .          | .                         | .         |
| chr9 | 132346548 | 132346549 | chr9 | 132346428 | 132346851 | MLT1J      | LTR                       | ERVL-MaLR |
| chr9 | 133003033 | 133003034 | chr9 | 133002990 | 133003097 | MLT1J      | LTR                       | ERVL-MaLR |
| chr9 | 133263024 | 133263025 | chr9 | 133262630 | 133263088 | MLT1J      | LTR                       | ERVL-MaLR |
| chr9 | 133424680 | 133424681 | chr9 | 133424546 | 133424832 | MLT1J2     | LTR                       | ERVL-MaLR |
| chr9 | 133557857 | 133557858 | chr9 | 133557778 | 133557881 | MIR3       | SINE                      | MIR       |
| chr9 | 134278391 | 134278392 | .    | .         | .         | .          | .                         | .         |
| chr9 | 134917935 | 134917936 | .    | .         | .         | .          | .                         | .         |
| chr9 | 136591770 | 136591771 | .    | .         | .         | .          | .                         | .         |
| chr9 | 136996432 | 136996433 | .    | .         | .         | .          | .                         | .         |
| chr9 | 137739180 | 137739181 | chr9 | 137739119 | 137739382 | (TG)n      | Simple_repe:Simple_repeat |           |
| chr9 | 137983315 | 137983316 | chr9 | 137983255 | 137983759 | (CA)n      | Simple_repe:Simple_repeat |           |
| chr9 | 139525761 | 139525762 | chr9 | 139525724 | 139525799 | (CAGC)n    | Simple_repe:Simple_repeat |           |
| chr9 | 139668322 | 139668323 | chr9 | 139668280 | 139668662 | MLT1J      | LTR                       | ERVL-MaLR |
| chr9 | 140188852 | 140188853 | chr9 | 140188785 | 140189020 | MLT1J      | LTR                       | ERVL-MaLR |
| chr9 | 140250143 | 140250144 | chr9 | 140249860 | 140250183 | GA-rich    | Low_comple:Low_complexity |           |
| chr9 | 140843744 | 140843745 | .    | .         | .         | .          | .                         | .         |
| chrX | 3214009   | 3214010   | .    | .         | .         | .          | .                         | .         |
| chrX | 16790153  | 16790154  | .    | .         | .         | .          | .                         | .         |
| chrX | 17265438  | 17265439  | chrX | 17265431  | 17265571  | MLT1J1     | LTR                       | ERVL-MaLR |
| chrX | 24444602  | 24444603  | chrX | 24444503  | 24444648  | LTR67B     | LTR                       | ERVL      |
| chrX | 39433621  | 39433622  | chrX | 39433547  | 39433826  | MLT1J2     | LTR                       | ERVL-MaLR |
| chrX | 39609144  | 39609145  | chrX | 39609011  | 39609503  | MLT1J      | LTR                       | ERVL-MaLR |
| chrX | 39815066  | 39815067  | chrX | 39814985  | 39815470  | LTR33A     | LTR                       | ERVL      |

|      |           |           |      |           |           |                 |                           |           |
|------|-----------|-----------|------|-----------|-----------|-----------------|---------------------------|-----------|
| chrX | 40856407  | 40856408  | chrX | 40856064  | 40856532  | MLT1J           | LTR                       | ERVL-MaLR |
| chrX | 40869538  | 40869539  | chrX | 40869481  | 40870090  | LTR33C          | LTR                       | ERVL      |
| chrX | 44510868  | 44510869  | chrX | 44510489  | 44510957  | LTR33A          | LTR                       | ERVL      |
| chrX | 48595701  | 48595702  | .    | .         | .         | .               | .                         | .         |
| chrX | 58561410  | 58561411  | chrX | 58544095  | 58582011  | ALR/Alpha       | Satellite                 | centr     |
| chrX | 61685642  | 61685643  | chrX | 61682014  | 61736573  | ALR/Alpha       | Satellite                 | centr     |
| chrX | 61691826  | 61691827  | chrX | 61682014  | 61736573  | ALR/Alpha       | Satellite                 | centr     |
| chrX | 61694711  | 61694712  | chrX | 61682014  | 61736573  | ALR/Alpha       | Satellite                 | centr     |
| chrX | 61717845  | 61717846  | chrX | 61682014  | 61736573  | ALR/Alpha       | Satellite                 | centr     |
| chrX | 61728612  | 61728613  | chrX | 61682014  | 61736573  | ALR/Alpha       | Satellite                 | centr     |
| chrX | 61734032  | 61734033  | chrX | 61682014  | 61736573  | ALR/Alpha       | Satellite                 | centr     |
| chrX | 61839308  | 61839309  | chrX | 61814437  | 61861625  | ALR/Alpha       | Satellite                 | centr     |
| chrX | 61841935  | 61841936  | chrX | 61814437  | 61861625  | ALR/Alpha       | Satellite                 | centr     |
| chrX | 69654348  | 69654349  | .    | .         | .         | .               | .                         | .         |
| chrX | 103401532 | 103401533 | .    | .         | .         | .               | .                         | .         |
| chrX | 108297735 | 108297736 | chrX | 108297348 | 108297830 | LSU-rRNA_H:rRNA | .                         | rRNA      |
| chrX | 111556864 | 111556865 | chrX | 111556835 | 111556890 | (TC)n           | Simple_repe:Simple_repeat | .         |
| chrX | 117359931 | 117359932 | .    | .         | .         | .               | .                         | .         |
| chrX | 129091445 | 129091446 | .    | .         | .         | .               | .                         | .         |
| chrX | 129116497 | 129116498 | .    | .         | .         | .               | .                         | .         |
| chrX | 135268012 | 135268013 | .    | .         | .         | .               | .                         | .         |
| chrX | 136520430 | 136520431 | chrX | 136520007 | 136520477 | L1PA7           | LINE                      | L1        |
| chrX | 139015342 | 139015343 | .    | .         | .         | .               | .                         | .         |
| chrX | 152127486 | 152127487 | .    | .         | .         | .               | .                         | .         |
| chrX | 152201070 | 152201071 | .    | .         | .         | .               | .                         | .         |
| chrY | 9985453   | 9985454   | chrY | 9985256   | 9985468   | MLT1H           | LTR                       | ERVL-MaLR |
| chrY | 10019373  | 10019374  | chrY | 10019144  | 10019435  | L1PREC2         | LINE                      | L1        |
| chrY | 10025235  | 10025236  | chrY | 10025145  | 10025252  | L1MD            | LINE                      | L1        |
| chrY | 10029655  | 10029656  | .    | .         | .         | .               | .                         | .         |
| chrY | 10031855  | 10031856  | chrY | 10031790  | 10031959  | Alu <b>b</b>    | SINE                      | Alu       |
| chrY | 10036121  | 10036122  | chrY | 10034864  | 10036712  | SSU-rRNA_H:rRNA | .                         | rRNA      |
| chrY | 10037848  | 10037849  | .    | .         | .         | .               | .                         | .         |
| chrY | 13137842  | 13137843  | chrY | 13137788  | 13137965  | (CATT)n         | Simple_repe:Simple_repeat | .         |
| chrY | 13466046  | 13466047  | chrY | 13464558  | 13469801  | BSR/Beta        | Satellite                 | Satellite |
| chrY | 13488889  | 13488890  | .    | .         | .         | .               | .                         | .         |
| chrY | 13677783  | 13677784  | chrY | 13677738  | 13678025  | (GAATG)n        | Satellite                 | Satellite |
| chrY | 13680970  | 13680971  | chrY | 13680945  | 13681124  | (GAATG)n        | Satellite                 | Satellite |
| chrY | 13704342  | 13704343  | chrY | 13703974  | 13704585  | (GAATG)n        | Satellite                 | Satellite |
| chrY | 13706078  | 13706079  | chrY | 13705968  | 13706145  | (GAATG)n        | Satellite                 | Satellite |
| chrY | 13810270  | 13810271  | chrY | 13809964  | 13810290  | (GAATG)n        | Satellite                 | Satellite |
| chrY | 13852007  | 13852008  | chrY | 13851756  | 13852108  | (GAATG)n        | Satellite                 | Satellite |
| chrY | 13863120  | 13863121  | chrY | 13862998  | 13863460  | (GAATG)n        | Satellite                 | Satellite |
| chrY | 13869459  | 13869460  | chrY | 13869404  | 13869939  | (GAATG)n        | Satellite                 | Satellite |
| chrY | 58997084  | 58997085  | chrY | 58983270  | 58997782  | BSR/Beta        | Satellite                 | Satellite |
