# Supplementary material for: Modulation of gene expression via overlapping binding sites exerted by ZNF143, Notch1 and THAP11
Source: PubMed Central journal article supplement — Nucleic Acids Res. 2013 Feb 12;41(7):4000–14. doi: 10.1093/nar/gkt088 (PMC3627581; doi:10.1093/nar/gkt088), 2013-02-12
Supplement: supp_gkt088_nar-03313-x-2012-File011.pdf [file supp_gkt088_nar-03313-x-2012-File011.pdf]

## 3T3 cells

| Zfp143 peaks <= 2kb from TSS |           |           | Repeats from repeatMasker (USCS) table |           |           |           |                           |           |
|------------------------------|-----------|-----------|----------------------------------------|-----------|-----------|-----------|---------------------------|-----------|
| Chromosome                   | Start     | End       | Chromosome                             | Start     | End       | repName   | repClass                  | repFamily |
| chr1                         | 6204523   | 6204924   | .                                      | .         | .         | .         | .                         | .         |
| chr1                         | 9535119   | 9535520   | .                                      | .         | .         | .         | .                         | .         |
| chr1                         | 9620524   | 9620925   | .                                      | .         | .         | .         | .                         | .         |
| chr1                         | 9690531   | 9690932   | chr1                                   | 9690510   | 9690675   | G-rich    | Low_comple:Low_complexity |           |
| chr1                         | 9738422   | 9738823   | .                                      | .         | .         | .         | .                         | .         |
| chr1                         | 16094646  | 16095047  | chr1                                   | 16094682  | 16094708  | (T)n      | Simple_repe:Simple_repeat |           |
| chr1                         | 16647066  | 16647467  | .                                      | .         | .         | .         | .                         | .         |
| chr1                         | 16655064  | 16655465  | .                                      | .         | .         | .         | .                         | .         |
| chr1                         | 17135240  | 17135641  | .                                      | .         | .         | .         | .                         | .         |
| chr1                         | 20810367  | 20810768  | chr1                                   | 20810614  | 20810641  | (T)n      | Simple_repe:Simple_repeat |           |
| chr1                         | 20810367  | 20810768  | chr1                                   | 20810726  | 20810812  | B4A       | SINE B4                   |           |
| chr1                         | 24685267  | 24685668  | chr1                                   | 24685526  | 24685557  | (TCCCG)n  | Simple_repe:Simple_repeat |           |
| chr1                         | 26744088  | 26744489  | .                                      | .         | .         | .         | .                         | .         |
| chr1                         | 33871236  | 33871637  | chr1                                   | 33871227  | 33871269  | (CCG)n    | Simple_repe:Simple_repeat |           |
| chr1                         | 34496129  | 34496530  | .                                      | .         | .         | .         | .                         | .         |
| chr1                         | 36301630  | 36302031  | chr1                                   | 36301667  | 36301795  | Lx8       | LINE L1                   |           |
| chr1                         | 36301630  | 36302031  | chr1                                   | 36301866  | 36302144  | B4A       | SINE B4                   |           |
| chr1                         | 36364260  | 36364661  | .                                      | .         | .         | .         | .                         | .         |
| chr1                         | 36526777  | 36527178  | .                                      | .         | .         | .         | .                         | .         |
| chr1                         | 36748096  | 36748497  | .                                      | .         | .         | .         | .                         | .         |
| chr1                         | 37486156  | 37486557  | chr1                                   | 37486528  | 37486618  | MIRb      | SINE MIR                  |           |
| chr1                         | 37929045  | 37929446  | .                                      | .         | .         | .         | .                         | .         |
| chr1                         | 37947149  | 37947550  | .                                      | .         | .         | .         | .                         | .         |
| chr1                         | 38054033  | 38054434  | .                                      | .         | .         | .         | .                         | .         |
| chr1                         | 39424496  | 39424897  | .                                      | .         | .         | .         | .                         | .         |
| chr1                         | 40282444  | 40282845  | chr1                                   | 40282782  | 40282824  | (CA)n     | Simple_repe:Simple_repeat |           |
| chr1                         | 43155378  | 43155779  | .                                      | .         | .         | .         | .                         | .         |
| chr1                         | 43990517  | 43990918  | .                                      | .         | .         | .         | .                         | .         |
| chr1                         | 44159132  | 44159533  | .                                      | .         | .         | .         | .                         | .         |
| chr1                         | 44175556  | 44175957  | chr1                                   | 44175851  | 44175912  | CT-rich   | Low_comple:Low_complexity |           |
| chr1                         | 45852056  | 45852457  | .                                      | .         | .         | .         | .                         | .         |
| chr1                         | 54307341  | 54307742  | .                                      | .         | .         | .         | .                         | .         |
| chr1                         | 54495663  | 54496064  | chr1                                   | 54495995  | 54496203  | B2_Mm2    | SINE B2                   |           |
| chr1                         | 55084168  | 55084569  | chr1                                   | 55084487  | 55084622  | B1_Mm     | SINE Alu                  |           |
| chr1                         | 55144688  | 55145089  | chr1                                   | 55144725  | 55144772  | GC_rich   | Low_comple:Low_complexity |           |
| chr1                         | 55144688  | 55145089  | chr1                                   | 55144804  | 55144825  | GC_rich   | Low_comple:Low_complexity |           |
| chr1                         | 55187782  | 55188183  | chr1                                   | 55188034  | 55188082  | (CCCCG)n  | Simple_repe:Simple_repeat |           |
| chr1                         | 55285060  | 55285461  | .                                      | .         | .         | .         | .                         | .         |
| chr1                         | 57463377  | 57463778  | .                                      | .         | .         | .         | .                         | .         |
| chr1                         | 58052595  | 58052996  | .                                      | .         | .         | .         | .                         | .         |
| chr1                         | 58502142  | 58502543  | .                                      | .         | .         | .         | .                         | .         |
| chr1                         | 58561743  | 58562144  | chr1                                   | 58562124  | 58562146  | (A)n      | Simple_repe:Simple_repeat |           |
| chr1                         | 58643032  | 58643433  | .                                      | .         | .         | .         | .                         | .         |
| chr1                         | 59030139  | 59030540  | .                                      | .         | .         | .         | .                         | .         |
| chr1                         | 59741630  | 59742031  | chr1                                   | 59741675  | 59741696  | (A)n      | Simple_repe:Simple_repeat |           |
| chr1                         | 60154587  | 60154988  | .                                      | .         | .         | .         | .                         | .         |
| chr1                         | 63223391  | 63223792  | .                                      | .         | .         | .         | .                         | .         |
| chr1                         | 64577640  | 64578041  | .                                      | .         | .         | .         | .                         | .         |
| chr1                         | 65232911  | 65233312  | .                                      | .         | .         | .         | .                         | .         |
| chr1                         | 72629575  | 72629976  | .                                      | .         | .         | .         | .                         | .         |
| chr1                         | 74331340  | 74331741  | .                                      | .         | .         | .         | .                         | .         |
| chr1                         | 74552632  | 74553033  | .                                      | .         | .         | .         | .                         | .         |
| chr1                         | 74707884  | 74708285  | chr1                                   | 74708169  | 74708217  | C-rich    | Low_comple:Low_complexity |           |
| chr1                         | 75121417  | 75121818  | .                                      | .         | .         | .         | .                         | .         |
| chr1                         | 75232687  | 75233088  | chr1                                   | 75232487  | 75232703  | L2a       | LINE L2                   |           |
| chr1                         | 75232687  | 75233088  | chr1                                   | 75232965  | 75232993  | (CCCCCG)n | Simple_repe:Simple_repeat |           |
| chr1                         | 75432288  | 75432689  | .                                      | .         | .         | .         | .                         | .         |
| chr1                         | 78485355  | 78485756  | .                                      | .         | .         | .         | .                         | .         |
| chr1                         | 79772411  | 79772812  | .                                      | .         | .         | .         | .                         | .         |
| chr1                         | 84835981  | 84836382  | .                                      | .         | .         | .         | .                         | .         |
| chr1                         | 88051074  | 88051475  | .                                      | .         | .         | .         | .                         | .         |
| chr1                         | 88479233  | 88479634  | .                                      | .         | .         | .         | .                         | .         |
| chr1                         | 88600167  | 88600568  | .                                      | .         | .         | .         | .                         | .         |
| chr1                         | 89904963  | 89905364  | .                                      | .         | .         | .         | .                         | .         |
| chr1                         | 90173999  | 90174400  | .                                      | .         | .         | .         | .                         | .         |
| chr1                         | 91351026  | 91351427  | chr1                                   | 91351314  | 91351356  | GC_rich   | Low_comple:Low_complexity |           |
| chr1                         | 93295219  | 93295620  | chr1                                   | 93295321  | 93295343  | (CGG)n    | Simple_repe:Simple_repeat |           |
| chr1                         | 93295219  | 93295620  | chr1                                   | 93295406  | 93295427  | GC_rich   | Low_comple:Low_complexity |           |
| chr1                         | 93390991  | 93391392  | .                                      | .         | .         | .         | .                         | .         |
| chr1                         | 94830778  | 94831179  | .                                      | .         | .         | .         | .                         | .         |
| chr1                         | 95239918  | 95240319  | .                                      | .         | .         | .         | .                         | .         |
| chr1                         | 95532165  | 95532566  | .                                      | .         | .         | .         | .                         | .         |
| chr1                         | 95581817  | 95582218  | chr1                                   | 95581807  | 95581914  | B3        | SINE B2                   |           |
| chr1                         | 99666529  | 99666930  | .                                      | .         | .         | .         | .                         | .         |
| chr1                         | 108067809 | 108068210 | .                                      | .         | .         | .         | .                         | .         |
| chr1                         | 108693114 | 108693515 | chr1                                   | 108693367 | 108693589 | L1MD3     | LINE L1                   |           |
| chr1                         | 120284656 | 120285057 | chr1                                   | 120284532 | 120284720 | L1MB2     | LINE L1                   |           |
| chr1                         | 120355799 | 120356200 | .                                      | .         | .         | .         | .                         | .         |
| chr1                         | 121809571 | 121809972 | .                                      | .         | .         | .         | .                         | .         |
| chr1                         | 122017599 | 122018000 | .                                      | .         | .         | .         | .                         | .         |
| chr1                         | 122498714 | 122499115 | .                                      | .         | .         | .         | .                         | .         |
| chr1                         | 123464384 | 123464785 | .                                      | .         | .         | .         | .                         | .         |
| chr1                         | 129670321 | 129670722 | .                                      | .         | .         | .         | .                         | .         |
| chr1                         | 129765174 | 129765575 | .                                      | .         | .         | .         | .                         | .         |
| chr1                         | 129999107 | 129999508 | .                                      | .         | .         | .         | .                         | .         |
| chr1                         | 130140464 | 130140865 | .                                      | .         | .         | .         | .                         | .         |
| chr1                         | 133035752 | 133036153 | .                                      | .         | .         | .         | .                         | .         |
| chr1                         | 133587057 | 133587458 | .                                      | .         | .         | .         | .                         | .         |
| chr1                         | 133763551 | 133763952 | chr1                                   | 133763502 | 133763614 | ID_B1     | SINE B4                   |           |
| chr1                         | 134313757 | 134314158 | .                                      | .         | .         | .         | .                         | .         |
| chr1                         | 134373497 | 134373898 | .                                      | .         | .         | .         | .                         | .         |
| chr1                         | 134921812 | 134922213 | chr1                                   | 134922106 | 134922226 | B1_Mus2   | SINE Alu                  |           |

| repName count | repClass count | repFamily count |
|---------------|----------------|-----------------|
| GC_rich       | 191            | Simple repe 314 |
| (CGG)n        | 41             | Low_comple 288  |
| ID_B1         | 26             | Alu 135         |
| AT_rich       | 26             | LTR 53          |
| (A)n          | 25             | LINE 33         |
| (CCG)n        | 24             | DNA 21          |
| B3            | 24             | tRNA 9          |
| (T)n          | 23             | snRNA 8         |
| PB1D10        | 23             | rRNA 2          |
| G-rich        | 22             | Satellite 2     |
| B1_Mus1       | 20             | Unknown 1       |
| GA-rich       | 20             | snpRNA 1        |
| (CCCCG)n      | 16             | scrRNA 1        |
| (CA)n         | 15             | rRNA 1          |
| B1_Mus2       | 15             | ID 8            |
| (CGGG)n       | 15             | ERV1 6          |
| C-rich        | 13             | MER2_type 4     |
| (TG)n         | 13             | AcHobo 2        |
| RSINE1        | 13             | rRNA 2          |
| B2_Mm2        | 11             | hAT 2           |
| (TTTG)n       | 11             | Satellite 2     |
| PB1D7         | 11             | Y-chromosom 1   |
| B1_Mur1       | 11             | snpRNA 1        |
| MIRb          | 9              | Tip100 1        |
| CT-rich       | 9              | scrRNA 1        |
| (GA)n         | 9              | RTE 1           |
| PB1D9         | 9              | Gypsy? 1        |
| (CCCCG)n      | 9              | RNA 1           |
| RLR15         | 9              |                 |
| B4A           | 8              |                 |
| (GGA)n        | 8              |                 |
| B1F           | 8              |                 |
| B1_Mm         | 7              |                 |
| B1_Mur4       | 7              |                 |
| B1_Mur2       | 7              |                 |
| L2a           | 6              |                 |
| PB1           | 6              |                 |
| B4            | 6              |                 |
| MIR           | 6              |                 |
| T-rich        | 5              |                 |
| (TC)n         | 5              |                 |
| B1F2          | 5              |                 |
| (CGCGG)n      | 4              |                 |
| B3A           | 4              |                 |
| L2b           | 4              |                 |
| ID4           | 4              |                 |
| MIRm          | 4              |                 |
| L2            | 4              |                 |
| (CAAAA)n      | 4              |                 |
| (CCGGG)n      | 4              |                 |
| Lx8           | 3              |                 |
| (CCCCCG)n     | 3              |                 |
| URR1B         | 3              |                 |
| B1_Mur3       | 3              |                 |
| (CGAG)n       | 3              |                 |
| (TCC)n        | 3              |                 |
| MIRc          | 3              |                 |
| (CAG)n        | 3              |                 |
| B1F1          | 3              |                 |
| ID            | 3              |                 |
| MT2B2         | 3              |                 |
| MIR3          | 3              |                 |
| (CGGG)n       | 3              |                 |
| tRNA-Ala-GC   | 3              |                 |
| (TCTG)n       | 3              |                 |
| (TAAA)n       | 3              |                 |
| (TTTC)n       | 3              |                 |
| (GGGA)n       | 3              |                 |
| RLR42         | 3              |                 |
| RMER17B       | 3              |                 |
| MLT1J1        | 2              |                 |
| (CACG)n       | 2              |                 |
| (CAGAGA)n     | 2              |                 |
| B2_Mm1t       | 2              |                 |
| (TCTCTG)n     | 2              |                 |
| RMER30        | 2              |                 |
| (CCCCA)n      | 2              |                 |
| (CAAA)n       | 2              |                 |
| U1            | 2              |                 |
| MERSB         | 2              |                 |
| (CTGGGG)n     | 2              |                 |
| (CGTG)n       | 2              |                 |
| (G)n          | 2              |                 |
| LSU-rRNA_H    | 2              |                 |
| MT2B          | 2              |                 |
| (C)n          | 2              |                 |
| A-rich        | 2              |                 |
| MTC           | 2              |                 |
| L2c           | 2              |                 |
| (TTTTG)n      | 2              |                 |
| URR1A         | 2              |                 |
| MERS3         | 2              |                 |

|       |           |           |       |           |           |          |                |             |   |
|-------|-----------|-----------|-------|-----------|-----------|----------|----------------|-------------|---|
| chr1  | 135506651 | 135507052 | .     | .         | .         | .        | .              | GSAT_MM     | 2 |
| chr1  | 135557827 | 135558228 | .     | .         | .         | .        | .              | (CAGCC)n    | 2 |
| chr1  | 136006569 | 136006970 | chr1  | 136006546 | 136006592 | G-rich   | Low_complexity | (CTCG)n     | 2 |
| chr1  | 136006569 | 136006970 | chr1  | 136006701 | 136006745 | (CA)n    | Simple_repeat  | RMER2       | 2 |
| chr1  | 136006569 | 136006970 | chr1  | 136006754 | 136006847 | MLT1J1   | LTR            | Tigger7     | 2 |
| chr1  | 136006569 | 136006970 | chr1  | 136006947 | 136006996 | (TG)n    | Simple_repeat  | (TGG)n      | 2 |
| chr1  | 136302323 | 136302724 | .     | .         | .         | .        | .              | (TCCC)n     | 1 |
| chr1  | 136852430 | 136852831 | .     | .         | .         | .        | .              | L1MD3       | 1 |
| chr1  | 137210179 | 137210580 | chr1  | 137210553 | 137210679 | B1_Mus1  | SINE           | Alu         | 1 |
| chr1  | 137269891 | 137270292 | .     | .         | .         | .        | .              | (CAT)n      | 1 |
| chr1  | 137662520 | 137662921 | .     | .         | .         | .        | .              | RMER4A      | 1 |
| chr1  | 138521296 | 138521697 | chr1  | 138521597 | 138521623 | (CGG)n   | Simple_repeat  | U5          | 1 |
| chr1  | 138521296 | 138521697 | chr1  | 138521640 | 138521762 | (CGGG)n  | Simple_repeat  | U3          | 1 |
| chr1  | 138592413 | 138592814 | .     | .         | .         | .        | .              | U6          | 1 |
| chr1  | 140516147 | 140516548 | .     | .         | .         | .        | .              | tRNA-Asn-AA | 1 |
| chr1  | 145624161 | 145624562 | chr1  | 145624159 | 145624208 | (CCCCG)n | Simple_repeat  | (CTCGG)n    | 1 |
| chr1  | 151807919 | 151808320 | .     | .         | .         | .        | .              | Lx5         | 1 |
| chr1  | 152240147 | 152240548 | .     | .         | .         | .        | .              | CYRA11_Mm   | 1 |
| chr1  | 153275378 | 153275779 | .     | .         | .         | .        | .              | (TCTA)n     | 1 |
| chr1  | 153602005 | 153602406 | .     | .         | .         | .        | .              | RLTR24      | 1 |
| chr1  | 155180156 | 155180557 | .     | .         | .         | .        | .              | L1ME3A      | 1 |
| chr1  | 157820237 | 157820638 | chr1  | 157820327 | 157820360 | (CGG)n   | Simple_repeat  | (GTTTG)n    | 1 |
| chr1  | 157883016 | 157883417 | .     | .         | .         | .        | .              | MER74B      | 1 |
| chr1  | 157887793 | 157888194 | .     | .         | .         | .        | .              | (TAAAA)n    | 1 |
| chr1  | 162964762 | 162965163 | .     | .         | .         | .        | .              | U2          | 1 |
| chr1  | 163000818 | 163001219 | .     | .         | .         | .        | .              | MTE2b       | 1 |
| chr1  | 163061471 | 163061872 | .     | .         | .         | .        | .              | RMER15      | 1 |
| chr1  | 163806958 | 163807359 | .     | .         | .         | .        | .              | (CTAAT)n    | 1 |
| chr1  | 163899140 | 163899541 | .     | .         | .         | .        | .              | ORR1E       | 1 |
| chr1  | 164478512 | 164478913 | .     | .         | .         | .        | .              | 7SLRNA      | 1 |
| chr1  | 165924728 | 165925129 | .     | .         | .         | .        | .              | MER2B       | 1 |
| chr1  | 166178649 | 166179050 | .     | .         | .         | .        | .              | MER81       | 1 |
| chr1  | 166237347 | 166237748 | .     | .         | .         | .        | .              | (CGGGG)n    | 1 |
| chr1  | 167166909 | 167167310 | .     | .         | .         | .        | .              | iD4         | 1 |
| chr1  | 169238671 | 169239072 | .     | .         | .         | .        | .              | (GGGAA)n    | 1 |
| chr1  | 172798590 | 172798991 | chr1  | 172798919 | 172798958 | (CAGC)n  | Simple_repeat  | tRNA-Arg-CG | 1 |
| chr1  | 172798590 | 172798991 | chr1  | 172798958 | 172799016 | (CATA)n  | Simple_repeat  | LTR33B      | 1 |
| chr1  | 173177154 | 173177555 | .     | .         | .         | .        | .              | LTR33A      | 1 |
| chr1  | 173223476 | 173223877 | chr1  | 173223430 | 173223857 | RMER4A   | LTR            | ERVK        | 1 |
| chr1  | 173258921 | 173259322 | .     | .         | .         | .        | .              | RLTR6-int   | 1 |
| chr1  | 173433264 | 173433665 | chr1  | 173433177 | 173433294 | U5       | snRNA          | snRNA       | 1 |
| chr1  | 174412013 | 174412414 | .     | .         | .         | .        | .              | (CG)n       | 1 |
| chr1  | 177555719 | 177556120 | .     | .         | .         | .        | .              | (TAGA)n     | 1 |
| chr1  | 177810459 | 177810860 | .     | .         | .         | .        | .              | MERS7D      | 1 |
| chr1  | 178744725 | 178745126 | .     | .         | .         | .        | .              | MERS4B      | 1 |
| chr1  | 179726767 | 179727168 | .     | .         | .         | .        | .              | (GAAA)n     | 1 |
| chr1  | 180117336 | 180117737 | .     | .         | .         | .        | .              | (TTA)n      | 1 |
| chr1  | 181476233 | 181476634 | .     | .         | .         | .        | .              | (CAGCC)n    | 1 |
| chr1  | 181733828 | 181734229 | .     | .         | .         | .        | .              | tRNA-Gly-GG | 1 |
| chr1  | 182571273 | 182571674 | chr1  | 182571306 | 182571405 | GC-rich  | Low_complexity | (CAAAA)n    | 1 |
| chr1  | 182655903 | 182656304 | .     | .         | .         | .        | .              | L1MC        | 1 |
| chr1  | 182945669 | 182946070 | .     | .         | .         | .        | .              | RLTR42-int  | 1 |
| chr1  | 183074196 | 183074597 | .     | .         | .         | .        | .              | (TCCA)n     | 1 |
| chr1  | 183080837 | 183081238 | .     | .         | .         | .        | .              | MER5A       | 1 |
| chr1  | 192735459 | 192735860 | .     | .         | .         | .        | .              | FordPrefect | 1 |
| chr1  | 192752255 | 192752656 | .     | .         | .         | .        | .              | (CTAA)n     | 1 |
| chr1  | 193149557 | 193149958 | .     | .         | .         | .        | .              | (TGGGG)n    | 1 |
| chr1  | 193645058 | 193645459 | .     | .         | .         | .        | .              | RMER17C     | 1 |
| chr1  | 196957527 | 196957928 | .     | .         | .         | .        | .              | ORR1C2      | 1 |
| chr10 | 7382872   | 7383273   | .     | .         | .         | .        | .              | MLT1B       | 1 |
| chr10 | 7400689   | 7401090   | .     | .         | .         | .        | .              | (TTGG)n     | 1 |
| chr10 | 9621775   | 9622176   | .     | .         | .         | .        | .              | RCHARR1     | 1 |
| chr10 | 12727974  | 12728375  | .     | .         | .         | .        | .              | (TGGG)n     | 1 |
| chr10 | 17954848  | 17955249  | .     | .         | .         | .        | .              | L1MC3       | 1 |
| chr10 | 20031991  | 20032392  | .     | .         | .         | .        | .              | (CATATA)n   | 1 |
| chr10 | 24589511  | 24589912  | .     | .         | .         | .        | .              | BC1_Mm      | 1 |
| chr10 | 33670864  | 33671265  | .     | .         | .         | .        | .              | (CCCCC)n    | 1 |
| chr10 | 39966723  | 39967124  | .     | .         | .         | .        | .              | Lx7         | 1 |
| chr10 | 39978147  | 39978548  | chr10 | 39978272  | 39978485  | U3       | snRNA          | snRNA       | 1 |
| chr10 | 40020388  | 40020789  | .     | .         | .         | .        | .              | L4          | 1 |
| chr10 | 40068830  | 40069231  | .     | .         | .         | .        | .              | tRNA-Arg-AG | 1 |
| chr10 | 40602974  | 40603375  | .     | .         | .         | .        | .              | (CAT)n      | 1 |
| chr10 | 41529274  | 41529675  | .     | .         | .         | .        | .              | U7          | 1 |
| chr10 | 42198187  | 42198588  | .     | .         | .         | .        | .              | (TCCC)n     | 1 |
| chr10 | 42221611  | 42222012  | .     | .         | .         | .        | .              | LR88b       | 1 |
| chr10 | 45297417  | 45297818  | .     | .         | .         | .        | .              | (GGAA)n     | 1 |
| chr10 | 57785592  | 57785993  | .     | .         | .         | .        | .              | (TTG)n      | 1 |
| chr10 | 59165122  | 59165523  | .     | .         | .         | .        | .              | RLTR19      | 1 |
| chr10 | 59342513  | 59342914  | .     | .         | .         | .        | .              | Lx2B        | 1 |
| chr10 | 59465721  | 59466122  | .     | .         | .         | .        | .              | (TTTA)n     | 1 |
| chr10 | 60215167  | 60215568  | .     | .         | .         | .        | .              | MT2A        | 1 |
| chr10 | 62114006  | 62114407  | chr10 | 62114372  | 62114400  | (CCCCG)n | Simple_repeat  | (GGGGA)n    | 1 |
| chr10 | 62845370  | 62845771  | chr10 | 62845746  | 62845808  | B1_Mm    | SINE           | Alu         | 1 |
| chr10 | 67011863  | 67012264  | .     | .         | .         | .        | .              | ORR1C1      | 1 |
| chr10 | 67375283  | 67375684  | .     | .         | .         | .        | .              | tRNA-Arg-CG | 1 |
| chr10 | 70700596  | 70700997  | .     | .         | .         | .        | .              | (CAGA)n     | 1 |
| chr10 | 70747855  | 70748256  | chr10 | 70748029  | 70748050  | GC-rich  | Low_complexity | tRNA-Leu-CT | 1 |
| chr10 | 72117427  | 72117828  | .     | .         | .         | .        | .              | MLT1J       | 1 |
| chr10 | 74980553  | 74980954  | .     | .         | .         | .        | .              | RMER16-int  | 1 |
| chr10 | 75226913  | 75227314  | chr10 | 75227280  | 75227336  | T-rich   | Low_complexity | MMVL30-int  | 1 |
| chr10 | 76495793  | 76496194  | .     | .         | .         | .        | .              | iAPEy-int   | 1 |
| chr10 | 76978377  | 76978778  | .     | .         | .         | .        | .              | RLTR13D3    | 1 |
| chr10 | 77084855  | 77085256  | chr10 | 77085207  | 77085252  | (CGCCG)n | Simple_repeat  | U13         | 1 |
| chr10 | 78054647  | 78055048  | chr10 | 78054638  | 78054719  | GC-rich  | Low_complexity | MER63D      | 1 |
| chr10 | 78054647  | 78055048  | chr10 | 78054758  | 78054785  | (T)n     | Simple_repeat  | (GGGTG)n    | 1 |
| chr10 | 78054647  | 78055048  | chr10 | 78054758  | 78054785  | (T)n     | Simple_repeat  | (TTTTG)n    | 1 |



|       |          |          |       |          |          |           |                           |
|-------|----------|----------|-------|----------|----------|-----------|---------------------------|
| chr11 | 4604383  | 4604784  | .     | .        | .        | .         | .                         |
| chr11 | 4795091  | 4795492  | .     | .        | .        | .         | .                         |
| chr11 | 5442055  | 5442456  | chr11 | 5442392  | 5442524  | ID_B1     | SINE B4                   |
| chr11 | 5661918  | 5662319  | .     | .        | .        | .         | .                         |
| chr11 | 5759995  | 5760396  | .     | .        | .        | .         | .                         |
| chr11 | 5762690  | 5763091  | .     | .        | .        | .         | .                         |
| chr11 | 6100011  | 6100412  | .     | .        | .        | .         | .                         |
| chr11 | 6167646  | 6168047  | .     | .        | .        | .         | .                         |
| chr11 | 6288121  | 6288522  | chr11 | 6287987  | 6288166  | RMER30    | DNA MER1_type             |
| chr11 | 6288121  | 6288522  | chr11 | 6288415  | 6288453  | AT_rich   | Low_comple:Low_complexity |
| chr11 | 6288121  | 6288522  | chr11 | 6288512  | 6288551  | B2_Mm2    | SINE B2                   |
| chr11 | 6446307  | 6446708  | chr11 | 6446261  | 6446347  | PB1D10    | SINE Alu                  |
| chr11 | 11708446 | 11708847 | .     | .        | .        | .         | .                         |
| chr11 | 16851068 | 16851469 | .     | .        | .        | .         | .                         |
| chr11 | 17111676 | 17112077 | .     | .        | .        | .         | .                         |
| chr11 | 20012833 | 20013234 | .     | .        | .        | .         | .                         |
| chr11 | 20101091 | 20101492 | .     | .        | .        | .         | .                         |
| chr11 | 20641401 | 20641802 | chr11 | 20641504 | 20641567 | (CGG)n    | Simple_repe:Simple_repeat |
| chr11 | 20991031 | 20991432 | chr11 | 20991391 | 20991443 | (CAG)n    | Simple_repe:Simple_repeat |
| chr11 | 21138589 | 21138990 | chr11 | 21138911 | 21139098 | (CGG)n    | Simple_repe:Simple_repeat |
| chr11 | 21471714 | 21472115 | .     | .        | .        | .         | .                         |
| chr11 | 23566182 | 23566583 | .     | .        | .        | .         | .                         |
| chr11 | 23795056 | 23795457 | .     | .        | .        | .         | .                         |
| chr11 | 29071824 | 29072225 | .     | .        | .        | .         | .                         |
| chr11 | 29273394 | 29273795 | chr11 | 29273466 | 29273495 | GC_rich   | Low_comple:Low_complexity |
| chr11 | 29426215 | 29426616 | .     | .        | .        | .         | .                         |
| chr11 | 29447988 | 29448389 | .     | .        | .        | .         | .                         |
| chr11 | 29925985 | 29926386 | .     | .        | .        | .         | .                         |
| chr11 | 30854203 | 30854604 | chr11 | 30854123 | 30854275 | (GGA)n    | Simple_repe:Simple_repeat |
| chr11 | 30886213 | 30886614 | .     | .        | .        | .         | .                         |
| chr11 | 31571759 | 31572160 | chr11 | 31571788 | 31571830 | (CGG)n    | Simple_repe:Simple_repeat |
| chr11 | 32124838 | 32125239 | .     | .        | .        | .         | .                         |
| chr11 | 32432938 | 32433339 | chr11 | 32433270 | 32433299 | GC_rich   | Low_comple:Low_complexity |
| chr11 | 32542398 | 32542799 | .     | .        | .        | .         | .                         |
| chr11 | 35582767 | 35583168 | chr11 | 35583108 | 35583131 | (CGG)n    | Simple_repe:Simple_repeat |
| chr11 | 40547111 | 40547512 | .     | .        | .        | .         | .                         |
| chr11 | 40568766 | 40569167 | chr11 | 40569035 | 40569086 | T-rich    | Low_comple:Low_complexity |
| chr11 | 43247055 | 43247456 | chr11 | 43246958 | 43247067 | B2_Mm2    | SINE B2                   |
| chr11 | 43247055 | 43247456 | chr11 | 43247140 | 43247176 | (A)n      | Simple_repe:Simple_repeat |
| chr11 | 43494874 | 43495275 | chr11 | 43494860 | 43494956 | L2a       | LINE L2                   |
| chr11 | 43561370 | 43561771 | .     | .        | .        | .         | .                         |
| chr11 | 45665202 | 45665603 | chr11 | 45665403 | 45665431 | GC_rich   | Low_comple:Low_complexity |
| chr11 | 48613602 | 48614003 | .     | .        | .        | .         | .                         |
| chr11 | 48630545 | 48630946 | .     | .        | .        | .         | .                         |
| chr11 | 50139222 | 50139623 | .     | .        | .        | .         | .                         |
| chr11 | 50641068 | 50641469 | chr11 | 50641433 | 50641527 | B1F1      | SINE Alu                  |
| chr11 | 50654928 | 50655329 | .     | .        | .        | .         | .                         |
| chr11 | 50700975 | 50701376 | .     | .        | .        | .         | .                         |
| chr11 | 50729485 | 50729886 | .     | .        | .        | .         | .                         |
| chr11 | 50744976 | 50745377 | .     | .        | .        | .         | .                         |
| chr11 | 50872530 | 50872931 | chr11 | 50872509 | 50872539 | (A)n      | Simple_repe:Simple_repeat |
| chr11 | 51502250 | 51502651 | .     | .        | .        | .         | .                         |
| chr11 | 51576964 | 51577365 | chr11 | 51576888 | 51576999 | B1_Mur4   | SINE Alu                  |
| chr11 | 51780924 | 51781325 | .     | .        | .        | .         | .                         |
| chr11 | 51817537 | 51817938 | chr11 | 51817597 | 51817630 | (CCCCCA)n | Simple_repe:Simple_repeat |
| chr11 | 53113954 | 53114355 | .     | .        | .        | .         | .                         |
| chr11 | 53137993 | 53138394 | .     | .        | .        | .         | .                         |
| chr11 | 53333014 | 53333415 | chr11 | 53333320 | 53333374 | GC_rich   | Low_comple:Low_complexity |
| chr11 | 53520698 | 53521099 | chr11 | 53520979 | 53521073 | PB1D7     | SINE Alu                  |
| chr11 | 53914148 | 53914549 | chr11 | 53914407 | 53914510 | G-rich    | Low_comple:Low_complexity |
| chr11 | 54674062 | 54674463 | .     | .        | .        | .         | .                         |
| chr11 | 55282369 | 55282770 | .     | .        | .        | .         | .                         |
| chr11 | 57331959 | 57332360 | .     | .        | .        | .         | .                         |
| chr11 | 57917427 | 57917828 | .     | .        | .        | .         | .                         |
| chr11 | 57984910 | 57985311 | chr11 | 57984562 | 57984932 | RLTR24    | LTR ERV1                  |
| chr11 | 58120327 | 58120728 | .     | .        | .        | .         | .                         |
| chr11 | 58752314 | 58752715 | chr11 | 58752266 | 58752322 | GC_rich   | Low_comple:Low_complexity |
| chr11 | 58752314 | 58752715 | chr11 | 58752404 | 58752433 | GC_rich   | Low_comple:Low_complexity |
| chr11 | 58791390 | 58791791 | .     | .        | .        | .         | .                         |
| chr11 | 58793197 | 58793598 | chr11 | 58793485 | 58793678 | B3A       | SINE B2                   |
| chr11 | 59041577 | 59041978 | .     | .        | .        | .         | .                         |
| chr11 | 59285529 | 59285930 | .     | .        | .        | .         | .                         |
| chr11 | 60166622 | 60167023 | .     | .        | .        | .         | .                         |
| chr11 | 60230477 | 60230878 | chr11 | 60230779 | 60230923 | (TG)n     | Simple_repe:Simple_repeat |
| chr11 | 60267863 | 60268264 | .     | .        | .        | .         | .                         |
| chr11 | 60512923 | 60513324 | chr11 | 60513151 | 60513192 | GC_rich   | Low_comple:Low_complexity |
| chr11 | 60541698 | 60542099 | .     | .        | .        | .         | .                         |
| chr11 | 60590630 | 60591031 | .     | .        | .        | .         | .                         |
| chr11 | 60643883 | 60644284 | chr11 | 60643856 | 60643973 | PB1D10    | SINE Alu                  |
| chr11 | 60692181 | 60692582 | .     | .        | .        | .         | .                         |
| chr11 | 61393559 | 61393960 | chr11 | 61393606 | 61393693 | L1ME3A    | LINE L1                   |
| chr11 | 61743530 | 61743931 | chr11 | 61743512 | 61743547 | GC_rich   | Low_comple:Low_complexity |
| chr11 | 61743530 | 61743931 | chr11 | 61743791 | 61743817 | GC_rich   | Low_comple:Low_complexity |
| chr11 | 62363396 | 62363797 | .     | .        | .        | .         | .                         |
| chr11 | 62416064 | 62416465 | chr11 | 62415948 | 62416069 | PB1       | SINE Alu                  |
| chr11 | 64792077 | 64792478 | .     | .        | .        | .         | .                         |
| chr11 | 64976286 | 64976687 | .     | .        | .        | .         | .                         |
| chr11 | 67346124 | 67346525 | chr11 | 67346428 | 67346687 | L2b       | LINE L2                   |
| chr11 | 67399965 | 67400366 | .     | .        | .        | .         | .                         |
| chr11 | 68829373 | 68829774 | chr11 | 68829392 | 68829492 | B1F1      | SINE Alu                  |
| chr11 | 69209371 | 69209772 | .     | .        | .        | .         | .                         |
| chr11 | 69392698 | 69393099 | chr11 | 69393071 | 69393128 | CT-rich   | Low_comple:Low_complexity |
| chr11 | 69572005 | 69572406 | .     | .        | .        | .         | .                         |
| chr11 | 69727254 | 69727655 | .     | .        | .        | .         | .                         |
| chr11 | 69733300 | 69733701 | .     | .        | .        | .         | .                         |

|       |          |          |       |          |          |           |       |                           |   |
|-------|----------|----------|-------|----------|----------|-----------|-------|---------------------------|---|
| chr11 | 69794006 | 69794407 | .     | .        | .        | .         | .     | .                         | . |
| chr11 | 69808971 | 69809372 | chr11 | 69809281 | 69809308 | (GGA)n    | .     | Simple_repe:Simple_repeat | . |
| chr11 | 69828746 | 69829147 | .     | .        | .        | .         | .     | .                         | . |
| chr11 | 70265158 | 70265559 | chr11 | 70265205 | 70265262 | PB1D9     | SINE  | Alu                       | . |
| chr11 | 70338592 | 70338993 | .     | .        | .        | .         | .     | .                         | . |
| chr11 | 70460309 | 70460710 | .     | .        | .        | .         | .     | .                         | . |
| chr11 | 70783746 | 70784147 | .     | .        | .        | .         | .     | .                         | . |
| chr11 | 70796350 | 70796751 | .     | .        | .        | .         | .     | .                         | . |
| chr11 | 70817860 | 70818261 | .     | .        | .        | .         | .     | .                         | . |
| chr11 | 70833141 | 70833542 | .     | .        | .        | .         | .     | .                         | . |
| chr11 | 72028363 | 72028764 | .     | .        | .        | .         | .     | .                         | . |
| chr11 | 72114846 | 72115247 | .     | .        | .        | .         | .     | .                         | . |
| chr11 | 72254634 | 72255035 | .     | .        | .        | .         | .     | .                         | . |
| chr11 | 72951663 | 72952064 | .     | .        | .        | .         | .     | .                         | . |
| chr11 | 72990300 | 72990701 | .     | .        | .        | .         | .     | .                         | . |
| chr11 | 73012391 | 73012792 | .     | .        | .        | .         | .     | .                         | . |
| chr11 | 74462742 | 74463143 | .     | .        | .        | .         | .     | .                         | . |
| chr11 | 75234695 | 75235096 | .     | .        | .        | .         | .     | .                         | . |
| chr11 | 75274596 | 75274997 | .     | .        | .        | .         | .     | .                         | . |
| chr11 | 75444099 | 75444500 | .     | .        | .        | .         | .     | .                         | . |
| chr11 | 75492534 | 75492935 | .     | .        | .        | .         | .     | .                         | . |
| chr11 | 75992954 | 75993355 | .     | .        | .        | .         | .     | .                         | . |
| chr11 | 76220265 | 76220666 | .     | .        | .        | .         | .     | .                         | . |
| chr11 | 76576944 | 76577345 | .     | .        | .        | .         | .     | .                         | . |
| chr11 | 76891736 | 76892137 | .     | .        | .        | .         | .     | .                         | . |
| chr11 | 77303414 | 77303815 | chr11 | 77303394 | 77303424 | GC_rich   | .     | Low_comple:Low_complexity | . |
| chr11 | 77303414 | 77303815 | chr11 | 77303425 | 77303446 | (CCG)n    | .     | Simple_repe:Simple_repeat | . |
| chr11 | 77499191 | 77499592 | chr11 | 77499236 | 77499273 | (CA)n     | .     | Simple_repe:Simple_repeat | . |
| chr11 | 77707198 | 77707599 | .     | .        | .        | .         | .     | .                         | . |
| chr11 | 77795127 | 77795528 | .     | .        | .        | .         | .     | .                         | . |
| chr11 | 77893663 | 77894064 | .     | .        | .        | .         | .     | .                         | . |
| chr11 | 77979694 | 77980095 | .     | .        | .        | .         | .     | .                         | . |
| chr11 | 77996955 | 77997356 | chr11 | 77997256 | 77997279 | (GTTTG)n  | .     | Simple_repe:Simple_repeat | . |
| chr11 | 77996955 | 77997356 | chr11 | 77997326 | 77997382 | B2_Mm2    | SINE  | B2                        | . |
| chr11 | 78325539 | 78325940 | chr11 | 78325687 | 78325710 | GC_rich   | .     | Low_comple:Low_complexity | . |
| chr11 | 78325539 | 78325940 | chr11 | 78325739 | 78325779 | GC_rich   | .     | Low_comple:Low_complexity | . |
| chr11 | 78349634 | 78350035 | .     | .        | .        | .         | .     | .                         | . |
| chr11 | 78959850 | 78960251 | .     | .        | .        | .         | .     | .                         | . |
| chr11 | 79806137 | 79806538 | chr11 | 79806516 | 79806548 | GC_rich   | .     | Low_comple:Low_complexity | . |
| chr11 | 80191230 | 80191631 | chr11 | 80191298 | 80191341 | GC_rich   | .     | Low_comple:Low_complexity | . |
| chr11 | 80196590 | 80196991 | .     | .        | .        | .         | .     | .                         | . |
| chr11 | 80241854 | 80242255 | .     | .        | .        | .         | .     | .                         | . |
| chr11 | 80623636 | 80624037 | .     | .        | .        | .         | .     | .                         | . |
| chr11 | 83105002 | 83105403 | .     | .        | .        | .         | .     | .                         | . |
| chr11 | 83390619 | 83391020 | chr11 | 83390901 | 83391265 | MER74B    | LTR   | ERVL                      | . |
| chr11 | 83566964 | 83567365 | .     | .        | .        | .         | .     | .                         | . |
| chr11 | 83755443 | 83755844 | .     | .        | .        | .         | .     | .                         | . |
| chr11 | 84693491 | 84693892 | .     | .        | .        | .         | .     | .                         | . |
| chr11 | 84729680 | 84730081 | chr11 | 84730016 | 84730106 | PB1D10    | SINE  | Alu                       | . |
| chr11 | 85165989 | 85166390 | .     | .        | .        | .         | .     | .                         | . |
| chr11 | 86497363 | 86497764 | .     | .        | .        | .         | .     | .                         | . |
| chr11 | 86570944 | 86571345 | .     | .        | .        | .         | .     | .                         | . |
| chr11 | 86620359 | 86620760 | .     | .        | .        | .         | .     | .                         | . |
| chr11 | 86900128 | 86900529 | .     | .        | .        | .         | .     | .                         | . |
| chr11 | 87239855 | 87240256 | chr11 | 87239846 | 87239872 | (CAAA)n   | .     | Simple_repe:Simple_repeat | . |
| chr11 | 87239855 | 87240256 | chr11 | 87240217 | 87240381 | U1        | snRNA | snRNA                     | . |
| chr11 | 87550839 | 87551240 | .     | .        | .        | .         | .     | .                         | . |
| chr11 | 87801018 | 87801419 | chr11 | 87801039 | 87801084 | C-rich    | .     | Low_comple:Low_complexity | . |
| chr11 | 87801018 | 87801419 | chr11 | 87801170 | 87801220 | G-rich    | .     | Low_comple:Low_complexity | . |
| chr11 | 87860659 | 87861060 | .     | .        | .        | .         | .     | .                         | . |
| chr11 | 88017735 | 88018136 | .     | .        | .        | .         | .     | .                         | . |
| chr11 | 90499297 | 90499698 | .     | .        | .        | .         | .     | .                         | . |
| chr11 | 93829441 | 93829842 | .     | .        | .        | .         | .     | .                         | . |
| chr11 | 93856433 | 93856834 | .     | .        | .        | .         | .     | .                         | . |
| chr11 | 94183059 | 94183460 | .     | .        | .        | .         | .     | .                         | . |
| chr11 | 94410155 | 94410556 | .     | .        | .        | .         | .     | .                         | . |
| chr11 | 94490822 | 94491223 | chr11 | 94491103 | 94491200 | G-rich    | .     | Low_comple:Low_complexity | . |
| chr11 | 94514856 | 94515257 | .     | .        | .        | .         | .     | .                         | . |
| chr11 | 94850980 | 94851381 | chr11 | 94851080 | 94851149 | G-rich    | .     | Low_comple:Low_complexity | . |
| chr11 | 94902603 | 94903004 | .     | .        | .        | .         | .     | .                         | . |
| chr11 | 95171428 | 95171829 | .     | .        | .        | .         | .     | .                         | . |
| chr11 | 95245614 | 95246015 | .     | .        | .        | .         | .     | .                         | . |
| chr11 | 95527953 | 95528354 | .     | .        | .        | .         | .     | .                         | . |
| chr11 | 95718621 | 95719022 | chr11 | 95718554 | 95718685 | B1_Mus1   | SINE  | Alu                       | . |
| chr11 | 95718621 | 95719022 | chr11 | 95718766 | 95718908 | B4        | SINE  | B4                        | . |
| chr11 | 95895997 | 95896398 | chr11 | 95896298 | 95896322 | GC_rich   | .     | Low_comple:Low_complexity | . |
| chr11 | 95926511 | 95926912 | chr11 | 95926475 | 95926594 | (CCG)n    | .     | Simple_repe:Simple_repeat | . |
| chr11 | 95937164 | 95937565 | .     | .        | .        | .         | .     | .                         | . |
| chr11 | 96638667 | 96639068 | .     | .        | .        | .         | .     | .                         | . |
| chr11 | 96650184 | 96650585 | chr11 | 96650131 | 96650230 | PB1D10    | SINE  | Alu                       | . |
| chr11 | 96839126 | 96839527 | .     | .        | .        | .         | .     | .                         | . |
| chr11 | 96902671 | 96903072 | chr11 | 96902814 | 96902848 | (T)n      | .     | Simple_repe:Simple_repeat | . |
| chr11 | 97049527 | 97049928 | .     | .        | .        | .         | .     | .                         | . |
| chr11 | 97176985 | 97177386 | .     | .        | .        | .         | .     | .                         | . |
| chr11 | 97564387 | 97564788 | .     | .        | .        | .         | .     | .                         | . |
| chr11 | 97627813 | 97628214 | .     | .        | .        | .         | .     | .                         | . |
| chr11 | 97643504 | 97643905 | .     | .        | .        | .         | .     | .                         | . |
| chr11 | 97745314 | 97745715 | chr11 | 97745326 | 97745363 | (TAAAAA)n | .     | Simple_repe:Simple_repeat | . |
| chr11 | 98261400 | 98261801 | .     | .        | .        | .         | .     | .                         | . |
| chr11 | 98299971 | 98300372 | .     | .        | .        | .         | .     | .                         | . |
| chr11 | 98448427 | 98448828 | .     | .        | .        | .         | .     | .                         | . |
| chr11 | 98543668 | 98544069 | .     | .        | .        | .         | .     | .                         | . |
| chr11 | 98590610 | 98591011 | .     | .        | .        | .         | .     | .                         | . |
| chr11 | 98636541 | 98636942 | .     | .        | .        | .         | .     | .                         | . |
| chr11 | 98670897 | 98671298 | chr11 | 98671259 | 98671348 | (CGG)n    | .     | Simple_repe:Simple_repeat | . |

|       |           |           |       |           |           |           |             |                |
|-------|-----------|-----------|-------|-----------|-----------|-----------|-------------|----------------|
| chr11 | 98724775  | 98725176  | chr11 | 98724668  | 98724798  | MER5B     | DNA         | MER1_type      |
| chr11 | 98724775  | 98725176  | chr11 | 98725014  | 98725099  | (GA)n     | Simple_repe | Simple_repeat  |
| chr11 | 98768725  | 98769126  | chr11 | 98768892  | 98768917  | (A)n      | Simple_repe | Simple_repeat  |
| chr11 | 98821402  | 98821803  | chr11 | 98821690  | 98821718  | GC_rich   | Low_comple  | Low_complexity |
| chr11 | 98821402  | 98821803  | chr11 | 98821794  | 98821829  | GC_rich   | Low_comple  | Low_complexity |
| chr11 | 99092173  | 99092574  | .     | .         | .         | .         | .           | .              |
| chr11 | 100259249 | 100259650 | .     | .         | .         | .         | .           | .              |
| chr11 | 100302133 | 100302534 | .     | .         | .         | .         | .           | .              |
| chr11 | 100333916 | 100334317 | chr11 | 100333995 | 100334055 | (CCG)n    | Simple_repe | Simple_repeat  |
| chr11 | 100389155 | 100389556 | .     | .         | .         | .         | .           | .              |
| chr11 | 100483969 | 100484370 | chr11 | 100483920 | 100483974 | ID        | SINE        | ID             |
| chr11 | 100483969 | 100484370 | chr11 | 100483974 | 100483995 | ID4       | SINE        | ID             |
| chr11 | 100573608 | 100574009 | chr11 | 100573554 | 100573657 | (CTGGGG)n | Simple_repe | Simple_repeat  |
| chr11 | 100599425 | 100599826 | .     | .         | .         | .         | .           | .              |
| chr11 | 100800872 | 100801273 | .     | .         | .         | .         | .           | .              |
| chr11 | 100870462 | 100870863 | chr11 | 100870835 | 100870874 | (CGG)n    | Simple_repe | Simple_repeat  |
| chr11 | 100943836 | 100944237 | chr11 | 100943858 | 100943893 | (CCCCG)n  | Simple_repe | Simple_repeat  |
| chr11 | 101114789 | 101115190 | chr11 | 101114830 | 101114854 | GC_rich   | Low_comple  | Low_complexity |
| chr11 | 101140103 | 101140504 | .     | .         | .         | .         | .           | .              |
| chr11 | 101163425 | 101163826 | chr11 | 101163805 | 101163844 | (TTTG)n   | Simple_repe | Simple_repeat  |
| chr11 | 101177088 | 101177489 | .     | .         | .         | .         | .           | .              |
| chr11 | 101303405 | 101303806 | .     | .         | .         | .         | .           | .              |
| chr11 | 101326031 | 101326432 | .     | .         | .         | .         | .           | .              |
| chr11 | 101413439 | 101413840 | .     | .         | .         | .         | .           | .              |
| chr11 | 101488343 | 101488744 | chr11 | 101488679 | 101488866 | U2        | snRNA       | snRNA          |
| chr11 | 101594057 | 101594458 | .     | .         | .         | .         | .           | .              |
| chr11 | 102017469 | 102017870 | .     | .         | .         | .         | .           | .              |
| chr11 | 102050709 | 102051110 | chr11 | 102051063 | 102051086 | GC_rich   | Low_comple  | Low_complexity |
| chr11 | 102146204 | 102146605 | .     | .         | .         | .         | .           | .              |
| chr11 | 102156485 | 102156886 | .     | .         | .         | .         | .           | .              |
| chr11 | 102292318 | 102292719 | chr11 | 102292697 | 102292824 | B1F       | SINE        | Alu            |
| chr11 | 102292318 | 102292719 | chr11 | 102292715 | 102292860 | MT2B2     | LTR         | ERV_L          |
| chr11 | 102417506 | 102417907 | .     | .         | .         | .         | .           | .              |
| chr11 | 102485520 | 102485921 | .     | .         | .         | .         | .           | .              |
| chr11 | 102558819 | 102559220 | .     | .         | .         | .         | .           | .              |
| chr11 | 102786652 | 102787053 | chr11 | 102786745 | 102786871 | B1_Mur1   | SINE        | Alu            |
| chr11 | 102889595 | 102889996 | .     | .         | .         | .         | .           | .              |
| chr11 | 102963960 | 102964361 | .     | .         | .         | .         | .           | .              |
| chr11 | 102977252 | 102977653 | chr11 | 102977579 | 102977666 | GA-rich   | Low_comple  | Low_complexity |
| chr11 | 102994375 | 102994776 | chr11 | 102994439 | 102994486 | (T)n      | Simple_repe | Simple_repeat  |
| chr11 | 104304151 | 104304552 | .     | .         | .         | .         | .           | .              |
| chr11 | 105897623 | 105898024 | .     | .         | .         | .         | .           | .              |
| chr11 | 105927120 | 105927521 | chr11 | 105927084 | 105927137 | MIR3      | SINE        | MIR            |
| chr11 | 105945611 | 105946012 | .     | .         | .         | .         | .           | .              |
| chr11 | 106055242 | 106055643 | .     | .         | .         | .         | .           | .              |
| chr11 | 106077550 | 106077951 | chr11 | 106077675 | 106077703 | GC_rich   | Low_comple  | Low_complexity |
| chr11 | 106117195 | 106117596 | .     | .         | .         | .         | .           | .              |
| chr11 | 106134339 | 106134740 | .     | .         | .         | .         | .           | .              |
| chr11 | 106362695 | 106363096 | chr11 | 106363078 | 106363131 | B1_Mus2   | SINE        | Alu            |
| chr11 | 106577810 | 106578211 | .     | .         | .         | .         | .           | .              |
| chr11 | 106640679 | 106641080 | .     | .         | .         | .         | .           | .              |
| chr11 | 106649667 | 106650068 | .     | .         | .         | .         | .           | .              |
| chr11 | 106860799 | 106861200 | chr11 | 106861175 | 106861266 | P81D9     | SINE        | Alu            |
| chr11 | 106993759 | 106994160 | .     | .         | .         | .         | .           | .              |
| chr11 | 107050420 | 107050821 | .     | .         | .         | .         | .           | .              |
| chr11 | 107330095 | 107330496 | .     | .         | .         | .         | .           | .              |
| chr11 | 107340568 | 107340969 | .     | .         | .         | .         | .           | .              |
| chr11 | 107409085 | 107409486 | chr11 | 107409154 | 107409211 | G-rich    | Low_comple  | Low_complexity |
| chr11 | 109287255 | 109287656 | .     | .         | .         | .         | .           | .              |
| chr11 | 109582271 | 109582672 | .     | .         | .         | .         | .           | .              |
| chr11 | 110260187 | 110260588 | .     | .         | .         | .         | .           | .              |
| chr11 | 113063052 | 113063453 | chr11 | 113063404 | 113063477 | MTE2b     | LTR         | MaLR           |
| chr11 | 113426952 | 113427353 | .     | .         | .         | .         | .           | .              |
| chr11 | 113545272 | 113545673 | .     | .         | .         | .         | .           | .              |
| chr11 | 113612730 | 113613131 | .     | .         | .         | .         | .           | .              |
| chr11 | 114529615 | 114530016 | chr11 | 114529486 | 114529632 | B1_Mm     | SINE        | Alu            |
| chr11 | 114529615 | 114530016 | chr11 | 114529632 | 114529663 | AT_rich   | Low_comple  | Low_complexity |
| chr11 | 115264852 | 115265253 | chr11 | 115264774 | 115264860 | P81D10    | SINE        | Alu            |
| chr11 | 115281164 | 115281565 | chr11 | 115281443 | 115281478 | GC_rich   | Low_comple  | Low_complexity |
| chr11 | 115353065 | 115353466 | .     | .         | .         | .         | .           | .              |
| chr11 | 115397710 | 115398111 | .     | .         | .         | .         | .           | .              |
| chr11 | 115425493 | 115425894 | .     | .         | .         | .         | .           | .              |
| chr11 | 115474649 | 115475050 | chr11 | 115474671 | 115475069 | RMER15    | LTR         | ERV_L          |
| chr11 | 115489432 | 115489833 | .     | .         | .         | .         | .           | .              |
| chr11 | 115626508 | 115626909 | .     | .         | .         | .         | .           | .              |
| chr11 | 115675201 | 115675602 | .     | .         | .         | .         | .           | .              |
| chr11 | 115794669 | 115795070 | .     | .         | .         | .         | .           | .              |
| chr11 | 115872742 | 115873143 | chr11 | 115872643 | 115872754 | B1_Mur2   | SINE        | Alu            |
| chr11 | 115891311 | 115891712 | .     | .         | .         | .         | .           | .              |
| chr11 | 115948273 | 115948674 | .     | .         | .         | .         | .           | .              |
| chr11 | 115970183 | 115970584 | chr11 | 115970461 | 115970512 | (TC)n     | Simple_repe | Simple_repeat  |
| chr11 | 115991809 | 115992210 | .     | .         | .         | .         | .           | .              |
| chr11 | 116029379 | 116029780 | .     | .         | .         | .         | .           | .              |
| chr11 | 116060477 | 116060878 | .     | .         | .         | .         | .           | .              |
| chr11 | 116135282 | 116135683 | chr11 | 116135334 | 116135396 | (CCG)n    | Simple_repe | Simple_repeat  |
| chr11 | 116135282 | 116135683 | chr11 | 116135650 | 116135769 | B4A       | SINE        | B4             |
| chr11 | 116167866 | 116168267 | .     | .         | .         | .         | .           | .              |
| chr11 | 116351740 | 116352141 | .     | .         | .         | .         | .           | .              |
| chr11 | 116453694 | 116454095 | .     | .         | .         | .         | .           | .              |
| chr11 | 116519223 | 116519624 | .     | .         | .         | .         | .           | .              |
| chr11 | 116532704 | 116533105 | .     | .         | .         | .         | .           | .              |
| chr11 | 116704674 | 116705075 | .     | .         | .         | .         | .           | .              |
| chr11 | 116714825 | 116715226 | .     | .         | .         | .         | .           | .              |
| chr11 | 116937896 | 116938297 | .     | .         | .         | .         | .           | .              |
| chr11 | 117192574 | 117192975 | .     | .         | .         | .         | .           | .              |

|       |           |           |       |           |           |          |             |                |   |
|-------|-----------|-----------|-------|-----------|-----------|----------|-------------|----------------|---|
| chr11 | 117515263 | 117515664 | .     | .         | .         | .        | .           | .              | . |
| chr11 | 117642010 | 117642411 | chr11 | 117642395 | 117642469 | MIR      | SINE        | MIR            | . |
| chr11 | 117710368 | 117710769 | .     | .         | .         | .        | .           | .              | . |
| chr11 | 117734633 | 117735034 | .     | .         | .         | .        | .           | .              | . |
| chr11 | 118280301 | 118280702 | .     | .         | .         | .        | .           | .              | . |
| chr11 | 119464105 | 119464506 | .     | .         | .         | .        | .           | .              | . |
| chr11 | 119960087 | 119960488 | .     | .         | .         | .        | .           | .              | . |
| chr11 | 120012344 | 120012745 | .     | .         | .         | .        | .           | .              | . |
| chr11 | 120575024 | 120575425 | .     | .         | .         | .        | .           | .              | . |
| chr11 | 120645379 | 120645780 | chr11 | 120645376 | 120645415 | (CAG)n   | Simple_repe | Simple_repeat  | . |
| chr11 | 120645379 | 120645780 | chr11 | 120645481 | 120645528 | GC_rich  | Low_comple  | Low_complexity | . |
| chr11 | 120645379 | 120645780 | chr11 | 120645712 | 120645752 | (CGGG)n  | Simple_repe | Simple_repeat  | . |
| chr11 | 120794039 | 120794440 | .     | .         | .         | .        | .           | .              | . |
| chr11 | 121313051 | 121313452 | .     | .         | .         | .        | .           | .              | . |
| chr12 | 3235127   | 3235528   | .     | .         | .         | .        | .           | .              | . |
| chr12 | 3364905   | 3365306   | chr12 | 3365271   | 3365293   | GC_rich  | Low_comple  | Low_complexity | . |
| chr12 | 3427650   | 3428051   | chr12 | 3427874   | 3428028   | T-rich   | Low_comple  | Low_complexity | . |
| chr12 | 4233806   | 4234207   | .     | .         | .         | .        | .           | .              | . |
| chr12 | 4849876   | 4850277   | chr12 | 4849811   | 4849937   | B1_Mus2  | SINE        | Alu            | . |
| chr12 | 8214707   | 8215108   | .     | .         | .         | .        | .           | .              | . |
| chr12 | 8680778   | 8681179   | chr12 | 8680899   | 8680940   | GC_rich  | Low_comple  | Low_complexity | . |
| chr12 | 8680778   | 8681179   | chr12 | 8681109   | 8681178   | GA-rich  | Low_comple  | Low_complexity | . |
| chr12 | 8980587   | 8980988   | .     | .         | .         | .        | .           | .              | . |
| chr12 | 9036647   | 9037048   | chr12 | 9036582   | 9036684   | (CTAAT)n | Simple_repe | Simple_repeat  | . |
| chr12 | 10397336  | 10397737  | .     | .         | .         | .        | .           | .              | . |
| chr12 | 11272176  | 11272577  | .     | .         | .         | .        | .           | .              | . |
| chr12 | 17551225  | 17551626  | chr12 | 17551602  | 17551638  | GC_rich  | Low_comple  | Low_complexity | . |
| chr12 | 21379340  | 21379741  | chr12 | 21379558  | 21379583  | GC_rich  | Low_comple  | Low_complexity | . |
| chr12 | 29320665  | 29321066  | .     | .         | .         | .        | .           | .              | . |
| chr12 | 31595680  | 31596081  | chr12 | 31595901  | 31595998  | ORR1E    | LTR         | MaLR           | . |
| chr12 | 32184542  | 32184943  | .     | .         | .         | .        | .           | .              | . |
| chr12 | 32635213  | 32635614  | .     | .         | .         | .        | .           | .              | . |
| chr12 | 40949738  | 40950139  | .     | .         | .         | .        | .           | .              | . |
| chr12 | 41172375  | 41172776  | .     | .         | .         | .        | .           | .              | . |
| chr12 | 52478358  | 52478759  | .     | .         | .         | .        | .           | .              | . |
| chr12 | 52792774  | 52793175  | chr12 | 52792756  | 52792793  | GC_rich  | Low_comple  | Low_complexity | . |
| chr12 | 52792774  | 52793175  | chr12 | 52792928  | 52792962  | (GGA)n   | Simple_repe | Simple_repeat  | . |
| chr12 | 55797406  | 55797807  | chr12 | 55797768  | 55797933  | U1       | snRNA       | snRNA          | . |
| chr12 | 55963509  | 55963910  | chr12 | 55963858  | 55963901  | (CGGG)n  | Simple_repe | Simple_repeat  | . |
| chr12 | 56181240  | 56181641  | .     | .         | .         | .        | .           | .              | . |
| chr12 | 56404008  | 56404409  | .     | .         | .         | .        | .           | .              | . |
| chr12 | 56499596  | 56499997  | .     | .         | .         | .        | .           | .              | . |
| chr12 | 56594448  | 56594849  | .     | .         | .         | .        | .           | .              | . |
| chr12 | 56937001  | 56937402  | .     | .         | .         | .        | .           | .              | . |
| chr12 | 66066452  | 66066853  | .     | .         | .         | .        | .           | .              | . |
| chr12 | 66273604  | 66274005  | .     | .         | .         | .        | .           | .              | . |
| chr12 | 70259947  | 70260348  | chr12 | 70260281  | 70260581  | 7SLRNA   | srpRNA      | srpRNA         | . |
| chr12 | 70269623  | 70270024  | .     | .         | .         | .        | .           | .              | . |
| chr12 | 70397406  | 70397807  | chr12 | 70397710  | 70397738  | GC_rich  | Low_comple  | Low_complexity | . |
| chr12 | 71087869  | 71088270  | chr12 | 71087769  | 71087892  | (CCG)n   | Simple_repe | Simple_repeat  | . |
| chr12 | 71087869  | 71088270  | chr12 | 71088114  | 71088142  | GC_rich  | Low_comple  | Low_complexity | . |
| chr12 | 72931800  | 72932201  | .     | .         | .         | .        | .           | .              | . |
| chr12 | 73636806  | 73637207  | .     | .         | .         | .        | .           | .              | . |
| chr12 | 73765770  | 73766171  | .     | .         | .         | .        | .           | .              | . |
| chr12 | 75065343  | 75065744  | chr12 | 75065217  | 75065355  | B1_Mur1  | SINE        | Alu            | . |
| chr12 | 76770863  | 76771264  | .     | .         | .         | .        | .           | .              | . |
| chr12 | 77470215  | 77470616  | chr12 | 77470608  | 77470656  | (CGTG)n  | Simple_repe | Simple_repeat  | . |
| chr12 | 77938516  | 77938917  | .     | .         | .         | .        | .           | .              | . |
| chr12 | 78063170  | 78063571  | .     | .         | .         | .        | .           | .              | . |
| chr12 | 80273482  | 80273883  | .     | .         | .         | .        | .           | .              | . |
| chr12 | 80292687  | 80293088  | .     | .         | .         | .        | .           | .              | . |
| chr12 | 80309643  | 80310044  | chr12 | 80309572  | 80309692  | PB1      | SINE        | Alu            | . |
| chr12 | 80398042  | 80398443  | .     | .         | .         | .        | .           | .              | . |
| chr12 | 81362256  | 81362657  | chr12 | 81362627  | 81362777  | MER2B    | DNA         | MER2_type      | . |
| chr12 | 81744719  | 81745120  | .     | .         | .         | .        | .           | .              | . |
| chr12 | 81891231  | 81891632  | .     | .         | .         | .        | .           | .              | . |
| chr12 | 82633732  | 82634133  | chr12 | 82634132  | 82634180  | (TG)n    | Simple_repe | Simple_repeat  | . |
| chr12 | 82695790  | 82696191  | .     | .         | .         | .        | .           | .              | . |
| chr12 | 84938075  | 84938476  | .     | .         | .         | .        | .           | .              | . |
| chr12 | 84972943  | 84973344  | .     | .         | .         | .        | .           | .              | . |
| chr12 | 85291381  | 85291782  | chr12 | 85291242  | 85291395  | B1_Mur2  | SINE        | Alu            | . |
| chr12 | 85702698  | 85703099  | .     | .         | .         | .        | .           | .              | . |
| chr12 | 86311648  | 86312049  | chr12 | 86312001  | 86312031  | (TTTG)n  | Simple_repe | Simple_repeat  | . |
| chr12 | 86560266  | 86560667  | .     | .         | .         | .        | .           | .              | . |
| chr12 | 86621337  | 86621738  | .     | .         | .         | .        | .           | .              | . |
| chr12 | 86680159  | 86680560  | .     | .         | .         | .        | .           | .              | . |
| chr12 | 86715713  | 86716114  | .     | .         | .         | .        | .           | .              | . |
| chr12 | 87165649  | 87166050  | .     | .         | .         | .        | .           | .              | . |
| chr12 | 88488442  | 88488843  | .     | .         | .         | .        | .           | .              | . |
| chr12 | 88607153  | 88607554  | .     | .         | .         | .        | .           | .              | . |
| chr12 | 88784620  | 88785021  | .     | .         | .         | .        | .           | .              | . |
| chr12 | 88813108  | 88813509  | .     | .         | .         | .        | .           | .              | . |
| chr12 | 89598740  | 89599141  | .     | .         | .         | .        | .           | .              | . |
| chr12 | 92622728  | 92623129  | .     | .         | .         | .        | .           | .              | . |
| chr12 | 93087650  | 93088051  | .     | .         | .         | .        | .           | .              | . |
| chr12 | 101397692 | 101398093 | .     | .         | .         | .        | .           | .              | . |
| chr12 | 102017113 | 102017514 | chr12 | 102016991 | 102017116 | MER5B    | DNA         | MER1_type      | . |
| chr12 | 103151183 | 103151584 | .     | .         | .         | .        | .           | .              | . |
| chr12 | 103995836 | 103996237 | .     | .         | .         | .        | .           | .              | . |
| chr12 | 104663904 | 104664305 | .     | .         | .         | .        | .           | .              | . |
| chr12 | 105990185 | 105990586 | .     | .         | .         | .        | .           | .              | . |
| chr12 | 106270322 | 106270723 | .     | .         | .         | .        | .           | .              | . |
| chr12 | 107022645 | 107023046 | chr12 | 107022777 | 107022805 | (G)n     | Simple_repe | Simple_repeat  | . |
| chr12 | 107248157 | 107248558 | .     | .         | .         | .        | .           | .              | . |
| chr12 | 110132268 | 110132669 | .     | .         | .         | .        | .           | .              | . |

|       |           |           |       |           |           |             |                           |
|-------|-----------|-----------|-------|-----------|-----------|-------------|---------------------------|
| chr12 | 111839316 | 111839717 | chr12 | 111839618 | 111839651 | GC_rich     | Low_comple:Low_complexity |
| chr12 | 112127247 | 112127648 | .     | .         | .         | .           | .                         |
| chr12 | 112775974 | 112776375 | .     | .         | .         | .           | .                         |
| chr12 | 112916088 | 112916489 | .     | .         | .         | .           | .                         |
| chr12 | 112951242 | 112951643 | chr12 | 112951367 | 112951392 | GC_rich     | Low_comple:Low_complexity |
| chr12 | 112996866 | 112997267 | chr12 | 112997069 | 112997090 | GC_rich     | Low_comple:Low_complexity |
| chr12 | 113205047 | 113205448 | chr12 | 113205386 | 113205476 | MER81       | DNA AcHobo                |
| chr12 | 114067643 | 114068044 | chr12 | 114067738 | 114067761 | GC_rich     | Low_comple:Low_complexity |
| chr12 | 117285633 | 117286034 | .     | .         | .         | .           | .                         |
| chr12 | 117501310 | 117501711 | .     | .         | .         | .           | .                         |
| chr12 | 119540348 | 119540749 | .     | .         | .         | .           | .                         |
| chr13 | 3610370   | 3610771   | .     | .         | .         | .           | .                         |
| chr13 | 3633040   | 3633441   | .     | .         | .         | .           | .                         |
| chr13 | 8870149   | 8870550   | .     | .         | .         | .           | .                         |
| chr13 | 12350343  | 12350744  | .     | .         | .         | .           | .                         |
| chr13 | 12657873  | 12658274  | .     | .         | .         | .           | .                         |
| chr13 | 14046512  | 14046913  | .     | .         | .         | .           | .                         |
| chr13 | 14131776  | 14132177  | chr13 | 14132065  | 14132123  | B1F         | SINE Alu                  |
| chr13 | 14155606  | 14156007  | chr13 | 14155979  | 14156049  | G-rich      | Low_comple:Low_complexity |
| chr13 | 14705233  | 14705634  | .     | .         | .         | .           | .                         |
| chr13 | 18035867  | 18036268  | chr13 | 18035951  | 18035986  | (CGG)n      | Simple_repe:Simple_repeat |
| chr13 | 18035867  | 18036268  | chr13 | 18036066  | 18036096  | GC_rich     | Low_comple:Low_complexity |
| chr13 | 18085006  | 18085407  | .     | .         | .         | .           | .                         |
| chr13 | 18808927  | 18809328  | .     | .         | .         | .           | .                         |
| chr13 | 22036622  | 22037023  | chr13 | 22036550  | 22036632  | ID_B1       | SINE B4                   |
| chr13 | 23523157  | 23523558  | chr13 | 23523153  | 23523188  | (CCCCCA)n   | Simple_repe:Simple_repeat |
| chr13 | 23523157  | 23523558  | chr13 | 23523280  | 23523353  | tRNA-Ala-GC | tRNA tRNA                 |
| chr13 | 23831507  | 23831908  | .     | .         | .         | .           | .                         |
| chr13 | 31065788  | 31066189  | chr13 | 31066090  | 31066263  | GA-rich     | Low_comple:Low_complexity |
| chr13 | 32893629  | 32894030  | .     | .         | .         | .           | .                         |
| chr13 | 34056524  | 34056925  | .     | .         | .         | .           | .                         |
| chr13 | 35997698  | 35998099  | .     | .         | .         | .           | .                         |
| chr13 | 38296557  | 38296958  | .     | .         | .         | .           | .                         |
| chr13 | 41344891  | 41345292  | .     | .         | .         | .           | .                         |
| chr13 | 43493546  | 43493947  | chr13 | 43493555  | 43493580  | (A)n        | Simple_repe:Simple_repeat |
| chr13 | 44825888  | 44826289  | chr13 | 44825883  | 44825925  | GC_rich     | Low_comple:Low_complexity |
| chr13 | 46823263  | 46823664  | chr13 | 46823247  | 46823304  | (CCG)n      | Simple_repe:Simple_repeat |
| chr13 | 47025667  | 47026068  | .     | .         | .         | .           | .                         |
| chr13 | 48608683  | 48609084  | .     | .         | .         | .           | .                         |
| chr13 | 49436612  | 49437013  | chr13 | 49436936  | 49436982  | (CGG)n      | Simple_repe:Simple_repeat |
| chr13 | 49748318  | 49748719  | .     | .         | .         | .           | .                         |
| chr13 | 49777209  | 49777610  | .     | .         | .         | .           | .                         |
| chr13 | 51741226  | 51741627  | .     | .         | .         | .           | .                         |
| chr13 | 54570094  | 54570495  | chr13 | 54570382  | 54570532  | B1_Mus1     | SINE Alu                  |
| chr13 | 54666561  | 54666962  | .     | .         | .         | .           | .                         |
| chr13 | 54676158  | 54676559  | chr13 | 54676124  | 54676203  | MIRm        | SINE MIR                  |
| chr13 | 54691271  | 54691672  | .     | .         | .         | .           | .                         |
| chr13 | 54795733  | 54796134  | .     | .         | .         | .           | .                         |
| chr13 | 55464100  | 55464501  | .     | .         | .         | .           | .                         |
| chr13 | 55637776  | 55638177  | .     | .         | .         | .           | .                         |
| chr13 | 55672349  | 55672750  | chr13 | 55672389  | 55672437  | (CCG)n      | Simple_repe:Simple_repeat |
| chr13 | 55694248  | 55694649  | .     | .         | .         | .           | .                         |
| chr13 | 55701149  | 55701550  | chr13 | 55701405  | 55701427  | GC_rich     | Low_comple:Low_complexity |
| chr13 | 56236681  | 56237082  | chr13 | 56236750  | 56236834  | (CCCCG)n    | Simple_repe:Simple_repeat |
| chr13 | 56236681  | 56237082  | chr13 | 56237043  | 56237067  | GC_rich     | Low_comple:Low_complexity |
| chr13 | 58316864  | 58317265  | .     | .         | .         | .           | .                         |
| chr13 | 59686277  | 59686678  | .     | .         | .         | .           | .                         |
| chr13 | 59871090  | 59871491  | .     | .         | .         | .           | .                         |
| chr13 | 62568028  | 62568429  | .     | .         | .         | .           | .                         |
| chr13 | 63532860  | 63533261  | .     | .         | .         | .           | .                         |
| chr13 | 65379891  | 65380292  | .     | .         | .         | .           | .                         |
| chr13 | 67006043  | 67006444  | .     | .         | .         | .           | .                         |
| chr13 | 67161949  | 67162350  | .     | .         | .         | .           | .                         |
| chr13 | 67182304  | 67182705  | .     | .         | .         | .           | .                         |
| chr13 | 67228929  | 67229330  | .     | .         | .         | .           | .                         |
| chr13 | 67273812  | 67274213  | .     | .         | .         | .           | .                         |
| chr13 | 67295187  | 67295588  | .     | .         | .         | .           | .                         |
| chr13 | 67369904  | 67370305  | .     | .         | .         | .           | .                         |
| chr13 | 67379298  | 67379699  | .     | .         | .         | .           | .                         |
| chr13 | 67407231  | 67407632  | .     | .         | .         | .           | .                         |
| chr13 | 67433359  | 67433760  | .     | .         | .         | .           | .                         |
| chr13 | 67461376  | 67461777  | .     | .         | .         | .           | .                         |
| chr13 | 67476573  | 67476974  | .     | .         | .         | .           | .                         |
| chr13 | 67500562  | 67500963  | .     | .         | .         | .           | .                         |
| chr13 | 67552377  | 67552778  | .     | .         | .         | .           | .                         |
| chr13 | 67585008  | 67585409  | .     | .         | .         | .           | .                         |
| chr13 | 67601283  | 67601684  | .     | .         | .         | .           | .                         |
| chr13 | 67626967  | 67627368  | .     | .         | .         | .           | .                         |
| chr13 | 67653908  | 67654309  | .     | .         | .         | .           | .                         |
| chr13 | 67710444  | 67710845  | chr13 | 67710807  | 67710954  | B1_Mus1     | SINE Alu                  |
| chr13 | 67738537  | 67738938  | .     | .         | .         | .           | .                         |
| chr13 | 67784287  | 67784688  | .     | .         | .         | .           | .                         |
| chr13 | 67829909  | 67830310  | .     | .         | .         | .           | .                         |
| chr13 | 67855962  | 67856363  | .     | .         | .         | .           | .                         |
| chr13 | 67880407  | 67880808  | chr13 | 67880375  | 67880498  | B1_Mus1     | SINE Alu                  |
| chr13 | 67880407  | 67880808  | chr13 | 67880498  | 67880575  | B4          | SINE B4                   |
| chr13 | 67914490  | 67914891  | .     | .         | .         | .           | .                         |
| chr13 | 70776872  | 70777273  | .     | .         | .         | .           | .                         |
| chr13 | 73465693  | 73466094  | .     | .         | .         | .           | .                         |
| chr13 | 73741222  | 73741623  | chr13 | 73741564  | 73741588  | GC_rich     | Low_comple:Low_complexity |
| chr13 | 74075059  | 74075460  | .     | .         | .         | .           | .                         |
| chr13 | 76235910  | 76236311  | .     | .         | .         | .           | .                         |
| chr13 | 77274578  | 77274979  | .     | .         | .         | .           | .                         |
| chr13 | 86186260  | 86186661  | .     | .         | .         | .           | .                         |
| chr13 | 91062384  | 91062785  | .     | .         | .         | .           | .                         |



|       |           |                 |           |           |                  |             |                |   |   |
|-------|-----------|-----------------|-----------|-----------|------------------|-------------|----------------|---|---|
| chr13 | 93614507  | 93614908        | .         | .         | .                | .           | .              | . | . |
| chr13 | 93962179  | 93962580        | .         | .         | .                | .           | .              | . | . |
| chr13 | 96145205  | 96145606        | .         | .         | .                | .           | .              | . | . |
| chr13 | 97312255  | 97312656 chr13  | 97312586  | 97312692  | GA-rich          | Low_comple  | Low_complexity | . | . |
| chr13 | 97907707  | 97908108        | .         | .         | .                | .           | .              | . | . |
| chr13 | 100894580 | 100894981 chr13 | 100894535 | 100894609 | PB1D10           | SINE        | Alu            | . | . |
| chr13 | 101603133 | 101603534       | .         | .         | .                | .           | .              | . | . |
| chr13 | 104968364 | 104968765       | .         | .         | .                | .           | .              | . | . |
| chr13 | 107726810 | 107727211       | .         | .         | .                | .           | .              | . | . |
| chr13 | 107736925 | 107737326       | .         | .         | .                | .           | .              | . | . |
| chr13 | 111070238 | 111070639       | .         | .         | .                | .           | .              | . | . |
| chr13 | 113450683 | 113451084       | .         | .         | .                | .           | .              | . | . |
| chr13 | 113717420 | 113717821       | .         | .         | .                | .           | .              | . | . |
| chr13 | 119175837 | 119176238       | .         | .         | .                | .           | .              | . | . |
| chr13 | 120276390 | 120276791 chr13 | 120276694 | 120276750 | B2_Mm2           | SINE        | B2             | . | . |
| chr14 | 8930404   | 8930805 chr14   | 8930698   | 8930823   | (CGG)n           | Simple_repe | Simple_repeat  | . | . |
| chr14 | 14793587  | 14793988 chr14  | 14793722  | 14793743  | GC-rich          | Low_comple  | Low_complexity | . | . |
| chr14 | 14793587  | 14793988 chr14  | 14793850  | 14793975  | GC-rich          | Low_comple  | Low_complexity | . | . |
| chr14 | 19103381  | 19103782        | .         | .         | .                | .           | .              | . | . |
| chr14 | 21113633  | 21114034 chr14  | 21113522  | 21113658  | B4A              | SINE        | B4             | . | . |
| chr14 | 21365605  | 21366006 chr14  | 21365609  | 21365632  | (CGGGGG)n        | Simple_repe | Simple_repeat  | . | . |
| chr14 | 21365605  | 21366006 chr14  | 21365632  | 21365660  | GC-rich          | Low_comple  | Low_complexity | . | . |
| chr14 | 21522082  | 21522483        | .         | .         | .                | .           | .              | . | . |
| chr14 | 21526273  | 21526674        | .         | .         | .                | .           | .              | . | . |
| chr14 | 22569557  | 22569958        | .         | .         | .                | .           | .              | . | . |
| chr14 | 25063566  | 25063967        | .         | .         | .                | .           | .              | . | . |
| chr14 | 26513437  | 26513838        | .         | .         | .                | .           | .              | . | . |
| chr14 | 26587034  | 26587435        | .         | .         | .                | .           | .              | . | . |
| chr14 | 27354334  | 27354735        | .         | .         | .                | .           | .              | . | . |
| chr14 | 27457265  | 27457666        | .         | .         | .                | .           | .              | . | . |
| chr14 | 28435271  | 28435672 chr14  | 28435594  | 28435695  | (CCCCG)n         | Simple_repe | Simple_repeat  | . | . |
| chr14 | 30781281  | 30781682        | .         | .         | .                | .           | .              | . | . |
| chr14 | 30791320  | 30791721 chr14  | 30791342  | 30791422  | ID4_             | SINE        | ID             | . | . |
| chr14 | 30791320  | 30791721 chr14  | 30791423  | 30791470  | (A)n             | Simple_repe | Simple_repeat  | . | . |
| chr14 | 30791320  | 30791721 chr14  | 30791677  | 30791717  | (GGAGAA)n        | Simple_repe | Simple_repeat  | . | . |
| chr14 | 31292508  | 31292909        | .         | .         | .                | .           | .              | . | . |
| chr14 | 31764344  | 31764745        | .         | .         | .                | .           | .              | . | . |
| chr14 | 31814327  | 31814728        | .         | .         | .                | .           | .              | . | . |
| chr14 | 32454327  | 32454728        | .         | .         | .                | .           | .              | . | . |
| chr14 | 35486767  | 35487168 chr14  | 35486994  | 35487029  | GC-rich          | Low_comple  | Low_complexity | . | . |
| chr14 | 45949353  | 45949754 chr14  | 45949424  | 45949472  | C-rich           | Low_comple  | Low_complexity | . | . |
| chr14 | 47407810  | 47408211        | .         | .         | .                | .           | .              | . | . |
| chr14 | 48187896  | 48188297        | .         | .         | .                | .           | .              | . | . |
| chr14 | 51427311  | 51427712        | .         | .         | .                | .           | .              | . | . |
| chr14 | 52504343  | 52504744        | .         | .         | .                | .           | .              | . | . |
| chr14 | 52639197  | 52639598        | .         | .         | .                | .           | .              | . | . |
| chr14 | 52816730  | 52817131        | .         | .         | .                | .           | .              | . | . |
| chr14 | 55136252  | 55136653 chr14  | 55136532  | 55136605  | tRNA-Arg-CG-tRNA |             | tRNA           | . | . |
| chr14 | 55272298  | 55272699        | .         | .         | .                | .           | .              | . | . |
| chr14 | 55305595  | 55305996        | .         | .         | .                | .           | .              | . | . |
| chr14 | 55711084  | 55711485 chr14  | 55711148  | 55711177  | (TCC)n           | Simple_repe | Simple_repeat  | . | . |
| chr14 | 55713421  | 55713822        | .         | .         | .                | .           | .              | . | . |
| chr14 | 56290799  | 56291200        | .         | .         | .                | .           | .              | . | . |
| chr14 | 57190574  | 57190975        | .         | .         | .                | .           | .              | . | . |
| chr14 | 57286590  | 57286991 chr14  | 57286543  | 57286633  | RSINE1           | SINE        | B4             | . | . |
| chr14 | 57397255  | 57397656        | .         | .         | .                | .           | .              | . | . |
| chr14 | 58042646  | 58043047        | .         | .         | .                | .           | .              | . | . |
| chr14 | 58283571  | 58283972        | .         | .         | .                | .           | .              | . | . |
| chr14 | 60870170  | 60870571        | .         | .         | .                | .           | .              | . | . |
| chr14 | 60883694  | 60884095        | .         | .         | .                | .           | .              | . | . |
| chr14 | 62058754  | 62059155 chr14  | 62058737  | 62058759  | GC-rich          | Low_comple  | Low_complexity | . | . |
| chr14 | 63378523  | 63378924 chr14  | 63378866  | 63378995  | G-rich           | Low_comple  | Low_complexity | . | . |
| chr14 | 63455888  | 63456289        | .         | .         | .                | .           | .              | . | . |
| chr14 | 65271059  | 65271460 chr14  | 65271120  | 65271186  | GA-rich          | Low_comple  | Low_complexity | . | . |
| chr14 | 65568577  | 65568978        | .         | .         | .                | .           | .              | . | . |
| chr14 | 66452824  | 66453225        | .         | .         | .                | .           | .              | . | . |
| chr14 | 70689158  | 70689559 chr14  | 70689155  | 70689211  | GC-rich          | Low_comple  | Low_complexity | . | . |
| chr14 | 71167272  | 71167673 chr14  | 71167396  | 71167593  | LTR33B           | LTR         | ERV1           | . | . |
| chr14 | 76154203  | 76154604 chr14  | 76154329  | 76154357  | GC-rich          | Low_comple  | Low_complexity | . | . |
| chr14 | 76244723  | 76245124        | .         | .         | .                | .           | .              | . | . |
| chr14 | 79797408  | 79797809        | .         | .         | .                | .           | .              | . | . |
| chr14 | 79825995  | 79826396 chr14  | 79825892  | 79826033  | B1_Mur2          | SINE        | Alu            | . | . |
| chr14 | 79851342  | 79851743        | .         | .         | .                | .           | .              | . | . |
| chr14 | 79987278  | 79987679        | .         | .         | .                | .           | .              | . | . |
| chr14 | 99498903  | 99499304        | .         | .         | .                | .           | .              | . | . |
| chr14 | 105576370 | 105576771       | .         | .         | .                | .           | .              | . | . |
| chr14 | 120876494 | 120876895       | .         | .         | .                | .           | .              | . | . |
| chr15 | 3945720   | 3946121         | .         | .         | .                | .           | .              | . | . |
| chr15 | 5066416   | 5066817         | .         | .         | .                | .           | .              | . | . |
| chr15 | 5135346   | 5135747         | .         | .         | .                | .           | .              | . | . |
| chr15 | 8049009   | 8049410         | .         | .         | .                | .           | .              | . | . |
| chr15 | 8059081   | 8059482 chr15   | 8059106   | 8059186   | C-rich           | Low_comple  | Low_complexity | . | . |
| chr15 | 9069984   | 9070385 chr15   | 9070264   | 9070289   | (GGA)n           | Simple_repe | Simple_repeat  | . | . |
| chr15 | 10415547  | 10415948        | .         | .         | .                | .           | .              | . | . |
| chr15 | 10929563  | 10929964 chr15  | 10929657  | 10929688  | (TTTG)n          | Simple_repe | Simple_repeat  | . | . |
| chr15 | 10929563  | 10929964 chr15  | 10929689  | 10929809  | LTR33A           | LTR         | ERV1           | . | . |
| chr15 | 10929563  | 10929964 chr15  | 10929853  | 10929940  | L2b              | LINE        | L2             | . | . |
| chr15 | 12047339  | 12047740        | .         | .         | .                | .           | .              | . | . |
| chr15 | 12754277  | 12754678        | .         | .         | .                | .           | .              | . | . |
| chr15 | 25913852  | 25914253        | .         | .         | .                | .           | .              | . | . |
| chr15 | 27560271  | 27560672 chr15  | 27560265  | 27560306  | GC-rich          | Low_comple  | Low_complexity | . | . |
| chr15 | 34372798  | 34373199        | .         | .         | .                | .           | .              | . | . |
| chr15 | 34424815  | 34425216        | .         | .         | .                | .           | .              | . | . |
| chr15 | 36539140  | 36539541        | .         | .         | .                | .           | .              | . | . |
| chr15 | 38763986  | 38764387 chr15  | 38764060  | 38764156  | MIRb             | SINE        | MIR            | . | . |



|       |           |           |       |           |           |                 |                           |      |   |
|-------|-----------|-----------|-------|-----------|-----------|-----------------|---------------------------|------|---|
| chr15 | 99555810  | 99556211  | .     | .         | .         | .               | .                         | .    | . |
| chr15 | 99802988  | 99803389  | .     | .         | .         | .               | .                         | .    | . |
| chr15 | 100253229 | 100253630 | .     | .         | .         | .               | .                         | .    | . |
| chr15 | 100299330 | 100299731 | chr15 | 100299418 | 100299453 | GC_rich         | Low_comple:Low_complexity |      |   |
| chr15 | 100325586 | 100325987 | .     | .         | .         | .               | .                         | .    | . |
| chr15 | 101114190 | 101114591 | .     | .         | .         | .               | .                         | .    | . |
| chr15 | 101198863 | 101199264 | chr15 | 101198906 | 101198960 | (TCTG)n         | Simple_repe:Simple_repeat |      |   |
| chr15 | 101198863 | 101199264 | chr15 | 101198991 | 101199103 | MIRb            | SINE                      | MIR  |   |
| chr15 | 101903882 | 101904283 | chr15 | 101904239 | 101904260 | GC_rich         | Low_comple:Low_complexity |      |   |
| chr15 | 101975743 | 101976144 | .     | .         | .         | .               | .                         | .    | . |
| chr15 | 102061009 | 102061410 | chr15 | 102060970 | 102061120 | B3              | SINE                      | B2   |   |
| chr15 | 102126437 | 102126838 | .     | .         | .         | .               | .                         | .    | . |
| chr15 | 102161923 | 102162324 | .     | .         | .         | .               | .                         | .    | . |
| chr15 | 102180996 | 102181397 | .     | .         | .         | .               | .                         | .    | . |
| chr15 | 102236157 | 102236558 | .     | .         | .         | .               | .                         | .    | . |
| chr15 | 102300663 | 102301064 | chr15 | 102301018 | 102301073 | (CCCG)n         | Simple_repe:Simple_repeat |      |   |
| chr15 | 102348923 | 102349324 | .     | .         | .         | .               | .                         | .    | . |
| chr15 | 102552450 | 102552851 | .     | .         | .         | .               | .                         | .    | . |
| chr15 | 102993599 | 102994000 | .     | .         | .         | .               | .                         | .    | . |
| chr15 | 103070354 | 103070755 | .     | .         | .         | .               | .                         | .    | . |
| chr16 | 3743485   | 3743886   | .     | .         | .         | .               | .                         | .    | . |
| chr16 | 3846910   | 3847311   | .     | .         | .         | .               | .                         | .    | . |
| chr16 | 3884397   | 3884798   | .     | .         | .         | .               | .                         | .    | . |
| chr16 | 3908445   | 3908846   | .     | .         | .         | .               | .                         | .    | . |
| chr16 | 4558466   | 4558867   | .     | .         | .         | .               | .                         | .    | . |
| chr16 | 4683631   | 4684032   | .     | .         | .         | .               | .                         | .    | . |
| chr16 | 4789772   | 4790173   | .     | .         | .         | .               | .                         | .    | . |
| chr16 | 4879686   | 4880087   | .     | .         | .         | .               | .                         | .    | . |
| chr16 | 4964121   | 4964522   | .     | .         | .         | .               | .                         | .    | . |
| chr16 | 5049772   | 5050173   | .     | .         | .         | .               | .                         | .    | . |
| chr16 | 8637538   | 8637939   | .     | .         | .         | .               | .                         | .    | . |
| chr16 | 10447323  | 10447724  | chr16 | 10447717  | 10447742  | (CAAA)n         | Simple_repe:Simple_repeat |      |   |
| chr16 | 10545212  | 10545613  | .     | .         | .         | .               | .                         | .    | . |
| chr16 | 11008268  | 11008669  | chr16 | 11008189  | 11008332  | B1F             | SINE                      | Alu  |   |
| chr16 | 11203248  | 11203649  | .     | .         | .         | .               | .                         | .    | . |
| chr16 | 11254286  | 11254687  | .     | .         | .         | .               | .                         | .    | . |
| chr16 | 11322719  | 11323120  | chr16 | 11322627  | 11322755  | ID_B1           | SINE                      | B4   |   |
| chr16 | 11322719  | 11323120  | chr16 | 11322681  | 11322768  | PB1D10          | SINE                      | Alu  |   |
| chr16 | 11322719  | 11323120  | chr16 | 11322954  | 11322984  | GC_rich         | Low_comple:Low_complexity |      |   |
| chr16 | 11322719  | 11323120  | chr16 | 11323006  | 11323083  | (CGG)n          | Simple_repe:Simple_repeat |      |   |
| chr16 | 13819037  | 13819438  | chr16 | 13819375  | 13819413  | (CGGG)n         | Simple_repe:Simple_repeat |      |   |
| chr16 | 14159497  | 14159898  | chr16 | 14159425  | 14159614  | CT-rich         | Low_comple:Low_complexity |      |   |
| chr16 | 14360973  | 14361374  | chr16 | 14360843  | 14360986  | B1_Mus1         | SINE                      | Alu  |   |
| chr16 | 14360973  | 14361374  | chr16 | 14360991  | 14361092  | ID_B1           | SINE                      | B4   |   |
| chr16 | 14360973  | 14361374  | chr16 | 14361261  | 14361329  | MIR             | SINE                      | MIR  |   |
| chr16 | 16302849  | 16303250  | .     | .         | .         | .               | .                         | .    | . |
| chr16 | 16358945  | 16359346  | .     | .         | .         | .               | .                         | .    | . |
| chr16 | 16870630  | 16871031  | .     | .         | .         | .               | .                         | .    | . |
| chr16 | 17111182  | 17111583  | .     | .         | .         | .               | .                         | .    | . |
| chr16 | 17201411  | 17201812  | chr16 | 17201671  | 17201835  | L2a             | LINE                      | L2   |   |
| chr16 | 17508830  | 17509231  | .     | .         | .         | .               | .                         | .    | . |
| chr16 | 17722818  | 17723219  | chr16 | 17723095  | 17723197  | GA-rich         | Low_comple:Low_complexity |      |   |
| chr16 | 17722818  | 17723219  | chr16 | 17723181  | 17723307  | (CAGAGA)n       | Simple_repe:Simple_repeat |      |   |
| chr16 | 17911271  | 17911672  | .     | .         | .         | .               | .                         | .    | . |
| chr16 | 17928823  | 17929224  | .     | .         | .         | .               | .                         | .    | . |
| chr16 | 18248718  | 18249119  | .     | .         | .         | .               | .                         | .    | . |
| chr16 | 18289397  | 18289798  | chr16 | 18289538  | 18289559  | GC_rich         | Low_comple:Low_complexity |      |   |
| chr16 | 18498623  | 18499024  | .     | .         | .         | .               | .                         | .    | . |
| chr16 | 18811940  | 18812341  | .     | .         | .         | .               | .                         | .    | . |
| chr16 | 20097358  | 20097759  | .     | .         | .         | .               | .                         | .    | . |
| chr16 | 20302292  | 20302693  | chr16 | 20302467  | 20302490  | (A)n            | Simple_repe:Simple_repeat |      |   |
| chr16 | 20426328  | 20426729  | .     | .         | .         | .               | .                         | .    | . |
| chr16 | 20498678  | 20499079  | chr16 | 20499037  | 20499066  | GC_rich         | Low_comple:Low_complexity |      |   |
| chr16 | 20535212  | 20535613  | .     | .         | .         | .               | .                         | .    | . |
| chr16 | 20651523  | 20651924  | .     | .         | .         | .               | .                         | .    | . |
| chr16 | 23107263  | 23107664  | .     | .         | .         | .               | .                         | .    | . |
| chr16 | 23127600  | 23128001  | .     | .         | .         | .               | .                         | .    | . |
| chr16 | 29579208  | 29579609  | .     | .         | .         | .               | .                         | .    | . |
| chr16 | 30587720  | 30588121  | .     | .         | .         | .               | .                         | .    | . |
| chr16 | 31948368  | 31948769  | .     | .         | .         | .               | .                         | .    | . |
| chr16 | 32003091  | 32003492  | .     | .         | .         | .               | .                         | .    | . |
| chr16 | 32079333  | 32079734  | chr16 | 32079431  | 32079461  | GC_rich         | Low_comple:Low_complexity |      |   |
| chr16 | 32079333  | 32079734  | chr16 | 32079723  | 32079827  | B1_Mur4         | SINE                      | Alu  |   |
| chr16 | 32419694  | 32420095  | .     | .         | .         | .               | .                         | .    | . |
| chr16 | 32430623  | 32431024  | .     | .         | .         | .               | .                         | .    | . |
| chr16 | 32868271  | 32868672  | .     | .         | .         | .               | .                         | .    | . |
| chr16 | 32877599  | 32878000  | .     | .         | .         | .               | .                         | .    | . |
| chr16 | 33056309  | 33056710  | .     | .         | .         | .               | .                         | .    | . |
| chr16 | 33380630  | 33381031  | chr16 | 33380912  | 33380967  | (GGA)n          | Simple_repe:Simple_repeat |      |   |
| chr16 | 35363769  | 35364170  | .     | .         | .         | .               | .                         | .    | . |
| chr16 | 35490812  | 35491213  | .     | .         | .         | .               | .                         | .    | . |
| chr16 | 35938345  | 35938746  | chr16 | 35938442  | 35938509  | ID4             | SINE                      | ID   |   |
| chr16 | 35981622  | 35982023  | chr16 | 35981667  | 35981748  | LSU-rRNA_H:rRNA | rRNA                      | rRNA |   |
| chr16 | 35981622  | 35982023  | chr16 | 35981743  | 35981907  | LSU-rRNA_H:rRNA | rRNA                      | rRNA |   |
| chr16 | 35981622  | 35982023  | chr16 | 35981909  | 35982195  | RLTR6-int       | LTR                       | ERV1 |   |
| chr16 | 35983129  | 35983530  | chr16 | 35983379  | 35983400  | GC_rich         | Low_comple:Low_complexity |      |   |
| chr16 | 36040987  | 36041388  | chr16 | 36040848  | 36041009  | B3              | SINE                      | B2   |   |
| chr16 | 37011602  | 37012003  | .     | .         | .         | .               | .                         | .    | . |
| chr16 | 37539956  | 37540357  | chr16 | 37540243  | 37540425  | MERVL-int       | LTR                       | ERVL |   |
| chr16 | 43889749  | 43890150  | .     | .         | .         | .               | .                         | .    | . |
| chr16 | 44724492  | 44724893  | .     | .         | .         | .               | .                         | .    | . |
| chr16 | 44746326  | 44746727  | .     | .         | .         | .               | .                         | .    | . |
| chr16 | 45742787  | 45743188  | chr16 | 45743144  | 45743167  | GC_rich         | Low_comple:Low_complexity |      |   |
| chr16 | 55934509  | 55934910  | .     | .         | .         | .               | .                         | .    | . |
| chr16 | 55966259  | 55966660  | .     | .         | .         | .               | .                         | .    | . |



|       |          |          |       |          |          |             |             |                |
|-------|----------|----------|-------|----------|----------|-------------|-------------|----------------|
| chr17 | 35372616 | 35373017 | chr17 | 35372937 | 35373020 | B1_Mur3     | SINE        | Alu            |
| chr17 | 35810519 | 35810920 | .     | .        | .        | .           | .           | .              |
| chr17 | 35975161 | 35975562 | .     | .        | .        | .           | .           | .              |
| chr17 | 35997961 | 35998362 | .     | .        | .        | .           | .           | .              |
| chr17 | 36016474 | 36016875 | chr17 | 36016295 | 36016475 | B3          | SINE        | B2             |
| chr17 | 36046663 | 36047064 | .     | .        | .        | .           | .           | .              |
| chr17 | 36053594 | 36053995 | .     | .        | .        | .           | .           | .              |
| chr17 | 36116114 | 36116515 | .     | .        | .        | .           | .           | .              |
| chr17 | 36394635 | 36395036 | .     | .        | .        | .           | .           | .              |
| chr17 | 37088456 | 37088857 | .     | .        | .        | .           | .           | .              |
| chr17 | 37095351 | 37095752 | .     | .        | .        | .           | .           | .              |
| chr17 | 41071183 | 41071584 | chr17 | 41071296 | 41071321 | (CAAAA)n    | Simple_repe | Simple_repeat  |
| chr17 | 43803951 | 43804352 | chr17 | 43804274 | 43804294 | (CAGCC)n    | Simple_repe | Simple_repeat  |
| chr17 | 43803951 | 43804352 | chr17 | 43804307 | 43804338 | (T)n        | Simple_repe | Simple_repeat  |
| chr17 | 45643597 | 45643998 | .     | .        | .        | .           | .           | .              |
| chr17 | 45710646 | 45711047 | .     | .        | .        | .           | .           | .              |
| chr17 | 45733495 | 45733896 | .     | .        | .        | .           | .           | .              |
| chr17 | 46247741 | 46248142 | .     | .        | .        | .           | .           | .              |
| chr17 | 46290273 | 46290674 | .     | .        | .        | .           | .           | .              |
| chr17 | 46297649 | 46298050 | chr17 | 46298018 | 46298089 | (CGG)n      | Simple_repe | Simple_repeat  |
| chr17 | 46419757 | 46420158 | .     | .        | .        | .           | .           | .              |
| chr17 | 46817721 | 46818122 | .     | .        | .        | .           | .           | .              |
| chr17 | 46848175 | 46848576 | .     | .        | .        | .           | .           | .              |
| chr17 | 46909537 | 46909938 | .     | .        | .        | .           | .           | .              |
| chr17 | 47147356 | 47147757 | .     | .        | .        | .           | .           | .              |
| chr17 | 47505628 | 47506029 | chr17 | 47505653 | 47505698 | (TAAA)n     | Simple_repe | Simple_repeat  |
| chr17 | 47505628 | 47506029 | chr17 | 47505699 | 47505728 | AT-rich     | Low_comple  | Low_complexity |
| chr17 | 47639045 | 47639446 | .     | .        | .        | .           | .           | .              |
| chr17 | 47831846 | 47832247 | chr17 | 47832110 | 47832247 | (CGGGG)n    | Simple_repe | Simple_repeat  |
| chr17 | 47873727 | 47874128 | .     | .        | .        | .           | .           | .              |
| chr17 | 48549329 | 48549730 | .     | .        | .        | .           | .           | .              |
| chr17 | 49567423 | 49567824 | chr17 | 49567400 | 49567444 | MT2B        | LTR         | ERVL           |
| chr17 | 49754221 | 49754622 | .     | .        | .        | .           | .           | .              |
| chr17 | 56098259 | 56098660 | chr17 | 56098198 | 56098337 | B1_Mur2     | SINE        | Alu            |
| chr17 | 56218241 | 56218642 | .     | .        | .        | .           | .           | .              |
| chr17 | 56220521 | 56220922 | .     | .        | .        | .           | .           | .              |
| chr17 | 56358173 | 56358574 | chr17 | 56358009 | 56358178 | (CGCGG)n    | Simple_repe | Simple_repeat  |
| chr17 | 56358173 | 56358574 | chr17 | 56358556 | 56358617 | tRNA-Gly-GG | tRNA        | tRNA           |
| chr17 | 56395913 | 56396314 | .     | .        | .        | .           | .           | .              |
| chr17 | 56416261 | 56416662 | chr17 | 56416482 | 56416590 | PB1D7       | SINE        | Alu            |
| chr17 | 56464942 | 56465343 | .     | .        | .        | .           | .           | .              |
| chr17 | 56723768 | 56724169 | chr17 | 56724100 | 56724123 | (C)n        | Simple_repe | Simple_repeat  |
| chr17 | 56749063 | 56749464 | .     | .        | .        | .           | .           | .              |
| chr17 | 56752595 | 56752996 | chr17 | 56752416 | 56752609 | B2_Mm2      | SINE        | B2             |
| chr17 | 56766147 | 56766548 | .     | .        | .        | .           | .           | .              |
| chr17 | 56812527 | 56812928 | chr17 | 56812764 | 56812787 | GC-rich     | Low_comple  | Low_complexity |
| chr17 | 56812527 | 56812928 | chr17 | 56812842 | 56812886 | GC-rich     | Low_comple  | Low_complexity |
| chr17 | 56856991 | 56857392 | .     | .        | .        | .           | .           | .              |
| chr17 | 56904328 | 56904729 | .     | .        | .        | .           | .           | .              |
| chr17 | 57129498 | 57129899 | .     | .        | .        | .           | .           | .              |
| chr17 | 57150691 | 57151092 | .     | .        | .        | .           | .           | .              |
| chr17 | 57170735 | 57171136 | chr17 | 57170670 | 57170798 | GC-rich     | Low_comple  | Low_complexity |
| chr17 | 57387194 | 57387595 | .     | .        | .        | .           | .           | .              |
| chr17 | 59152562 | 59152963 | chr17 | 59152947 | 59152975 | (T)n        | Simple_repe | Simple_repeat  |
| chr17 | 63232183 | 63232584 | chr17 | 63232546 | 63232590 | C-rich      | Low_comple  | Low_complexity |
| chr17 | 65963067 | 65963468 | .     | .        | .        | .           | .           | .              |
| chr17 | 66234155 | 66234556 | .     | .        | .        | .           | .           | .              |
| chr17 | 66450792 | 66451193 | chr17 | 66450868 | 66450916 | GC-rich     | Low_comple  | Low_complexity |
| chr17 | 66868990 | 66869391 | chr17 | 66868981 | 66869007 | (CCG)n      | Simple_repe | Simple_repeat  |
| chr17 | 71876012 | 71876413 | .     | .        | .        | .           | .           | .              |
| chr17 | 71947963 | 71948364 | .     | .        | .        | .           | .           | .              |
| chr17 | 74888617 | 74889018 | .     | .        | .        | .           | .           | .              |
| chr17 | 74927546 | 74927947 | chr17 | 74927934 | 74927970 | GC-rich     | Low_comple  | Low_complexity |
| chr17 | 75116907 | 75117308 | .     | .        | .        | .           | .           | .              |
| chr17 | 79135824 | 79136225 | chr17 | 79135950 | 79135975 | GC-rich     | Low_comple  | Low_complexity |
| chr17 | 79281706 | 79282107 | .     | .        | .        | .           | .           | .              |
| chr17 | 79315810 | 79316211 | .     | .        | .        | .           | .           | .              |
| chr17 | 79336193 | 79336594 | .     | .        | .        | .           | .           | .              |
| chr17 | 79420089 | 79420490 | chr17 | 79420175 | 79420225 | GC-rich     | Low_comple  | Low_complexity |
| chr17 | 80014626 | 80015027 | .     | .        | .        | .           | .           | .              |
| chr17 | 80526584 | 80526985 | chr17 | 80526505 | 80526665 | (GA)n       | Simple_repe | Simple_repeat  |
| chr17 | 80606635 | 80607036 | .     | .        | .        | .           | .           | .              |
| chr17 | 80623567 | 80623968 | .     | .        | .        | .           | .           | .              |
| chr17 | 80689341 | 80689742 | .     | .        | .        | .           | .           | .              |
| chr17 | 83751704 | 83752105 | .     | .        | .        | .           | .           | .              |
| chr17 | 85025556 | 85025957 | chr17 | 85025606 | 85025627 | (CAAAAA)n   | Simple_repe | Simple_repeat  |
| chr17 | 85190009 | 85190410 | .     | .        | .        | .           | .           | .              |
| chr17 | 85489735 | 85490136 | .     | .        | .        | .           | .           | .              |
| chr17 | 87361573 | 87361974 | .     | .        | .        | .           | .           | .              |
| chr17 | 95148806 | 95149207 | .     | .        | .        | .           | .           | .              |
| chr17 | 95233977 | 95234378 | .     | .        | .        | .           | .           | .              |
| chr18 | 4375365  | 4375766  | .     | .        | .        | .           | .           | .              |
| chr18 | 5334550  | 5334951  | chr18 | 5334830  | 5334851  | GC-rich     | Low_comple  | Low_complexity |
| chr18 | 6490642  | 6491043  | chr18 | 6490904  | 6490958  | GC-rich     | Low_comple  | Low_complexity |
| chr18 | 6490642  | 6491043  | chr18 | 6490971  | 6491042  | (CCCG)n     | Simple_repe | Simple_repeat  |
| chr18 | 13130501 | 13130902 | .     | .        | .        | .           | .           | .              |
| chr18 | 21054678 | 21055079 | .     | .        | .        | .           | .           | .              |
| chr18 | 24147932 | 24148333 | .     | .        | .        | .           | .           | .              |
| chr18 | 24178712 | 24179113 | .     | .        | .        | .           | .           | .              |
| chr18 | 24280268 | 24280669 | chr18 | 24280541 | 24280588 | B4A         | SINE        | B4             |
| chr18 | 24280268 | 24280669 | chr18 | 24280588 | 24280738 | B1F2        | SINE        | Alu            |
| chr18 | 25327053 | 25327454 | chr18 | 25327131 | 25327154 | (CGG)n      | Simple_repe | Simple_repeat  |
| chr18 | 31793703 | 31794104 | .     | .        | .        | .           | .           | .              |
| chr18 | 31919045 | 31919446 | .     | .        | .        | .           | .           | .              |
| chr18 | 32227113 | 32227514 | .     | .        | .        | .           | .           | .              |

|       |          |                |          |                          |                           |   |   |   |
|-------|----------|----------------|----------|--------------------------|---------------------------|---|---|---|
| chr18 | 32996672 | 32997073       | .        | .                        | .                         | . | . | . |
| chr18 | 33954297 | 33954698       | .        | .                        | .                         | . | . | . |
| chr18 | 34784066 | 34784467       | .        | .                        | .                         | . | . | . |
| chr18 | 34918539 | 34918940       | .        | .                        | .                         | . | . | . |
| chr18 | 35658330 | 35658731       | .        | .                        | .                         | . | . | . |
| chr18 | 35721665 | 35722066       | .        | .                        | .                         | . | . | . |
| chr18 | 35862596 | 35862997       | .        | .                        | .                         | . | . | . |
| chr18 | 35930850 | 35931251 chr18 | 35931196 | 35931234 GC-rich         | Low_comple:Low_complexity | . | . | . |
| chr18 | 36839027 | 36839428       | .        | .                        | .                         | . | . | . |
| chr18 | 36894876 | 36895277       | .        | .                        | .                         | . | . | . |
| chr18 | 36904142 | 36904543       | .        | .                        | .                         | . | . | . |
| chr18 | 36942668 | 36943069       | .        | .                        | .                         | . | . | . |
| chr18 | 36953276 | 36953677       | .        | .                        | .                         | . | . | . |
| chr18 | 40378859 | 40379260 chr18 | 40378890 | 40378915 (CGG)n          | Simple_repe:Simple_repeat | . | . | . |
| chr18 | 42421671 | 42422072       | .        | .                        | .                         | . | . | . |
| chr18 | 42670733 | 42671134       | .        | .                        | .                         | . | . | . |
| chr18 | 43554446 | 43554847 chr18 | 43554759 | 43554790 (TCTCTG)n       | Simple_repe:Simple_repeat | . | . | . |
| chr18 | 46440317 | 46440718       | .        | .                        | .                         | . | . | . |
| chr18 | 46757061 | 46757462       | .        | .                        | .                         | . | . | . |
| chr18 | 49991765 | 49992166 chr18 | 49991931 | 49991955 GC-rich         | Low_comple:Low_complexity | . | . | . |
| chr18 | 50287638 | 50288039       | .        | .                        | .                         | . | . | . |
| chr18 | 60720191 | 60720592       | .        | .                        | .                         | . | . | . |
| chr18 | 60934055 | 60934456       | .        | .                        | .                         | . | . | . |
| chr18 | 61008426 | 61008827 chr18 | 61008765 | 61008788 (A)n            | Simple_repe:Simple_repeat | . | . | . |
| chr18 | 61336508 | 61336909       | .        | .                        | .                         | . | . | . |
| chr18 | 61714734 | 61715135       | .        | .                        | .                         | . | . | . |
| chr18 | 63137300 | 63137701       | .        | .                        | .                         | . | . | . |
| chr18 | 63851857 | 63852258       | .        | .                        | .                         | . | . | . |
| chr18 | 64676046 | 64676447       | .        | .                        | .                         | . | . | . |
| chr18 | 65959891 | 65960292       | .        | .                        | .                         | . | . | . |
| chr18 | 66162086 | 66162487       | .        | .                        | .                         | . | . | . |
| chr18 | 68459724 | 68460125       | .        | .                        | .                         | . | . | . |
| chr18 | 70631996 | 70632397       | .        | .                        | .                         | . | . | . |
| chr18 | 70690156 | 70690557 chr18 | 70690140 | 70690165 (TTTC)n         | Simple_repe:Simple_repeat | . | . | . |
| chr18 | 70690156 | 70690557 chr18 | 70690170 | 70690375 B3A             | SINE B2                   | . | . | . |
| chr18 | 75159930 | 75160331 chr18 | 75159992 | 75160015 AT-rich         | Low_comple:Low_complexity | . | . | . |
| chr18 | 75178158 | 75178559       | .        | .                        | .                         | . | . | . |
| chr18 | 75857192 | 75857593 chr18 | 75857212 | 75857266 (GGGA)n         | Simple_repe:Simple_repeat | . | . | . |
| chr18 | 77182647 | 77183048       | .        | .                        | .                         | . | . | . |
| chr18 | 78006392 | 78006793       | .        | .                        | .                         | . | . | . |
| chr18 | 78012485 | 78012886 chr18 | 78012607 | 78012648 A-rich          | Low_comple:Low_complexity | . | . | . |
| chr18 | 80666566 | 80666967       | .        | .                        | .                         | . | . | . |
| chr18 | 85120776 | 85121177       | .        | .                        | .                         | . | . | . |
| chr18 | 89141083 | 89141484       | .        | .                        | .                         | . | . | . |
| chr19 | 3282796  | 3283197        | .        | .                        | .                         | . | . | . |
| chr19 | 3576117  | 3576518 chr19  | 3576262  | 3576335 tRNA-Ala-GC tRNA | tRNA                      | . | . | . |
| chr19 | 3912270  | 3912671 chr19  | 3912241  | 3912397 MIR              | SINE MIR                  | . | . | . |
| chr19 | 4012635  | 4013036        | .        | .                        | .                         | . | . | . |
| chr19 | 4125706  | 4126107 chr19  | 4125686  | 4125725 C-rich           | Low_comple:Low_complexity | . | . | . |
| chr19 | 4148363  | 4148764 chr19  | 4148265  | 4148378 PB1D9            | SINE Alu                  | . | . | . |
| chr19 | 4163199  | 4163600        | .        | .                        | .                         | . | . | . |
| chr19 | 4201401  | 4201802        | .        | .                        | .                         | . | . | . |
| chr19 | 4213469  | 4213870        | .        | .                        | .                         | . | . | . |
| chr19 | 4615716  | 4616117 chr19  | 4615797  | 4615857 (CCCCG)n         | Simple_repe:Simple_repeat | . | . | . |
| chr19 | 4793706  | 4794107        | .        | .                        | .                         | . | . | . |
| chr19 | 4877852  | 4878253 chr19  | 4878088  | 4878170 MIR              | SINE MIR                  | . | . | . |
| chr19 | 4961918  | 4962319        | .        | .                        | .                         | . | . | . |
| chr19 | 5024201  | 5024602        | .        | .                        | .                         | . | . | . |
| chr19 | 5041126  | 5041527        | .        | .                        | .                         | . | . | . |
| chr19 | 5050497  | 5050898        | .        | .                        | .                         | . | . | . |
| chr19 | 5088432  | 5088833        | .        | .                        | .                         | . | . | . |
| chr19 | 5106901  | 5107302        | .        | .                        | .                         | . | . | . |
| chr19 | 5118092  | 5118493        | .        | .                        | .                         | . | . | . |
| chr19 | 5295368  | 5295769        | .        | .                        | .                         | . | . | . |
| chr19 | 5366720  | 5367121        | .        | .                        | .                         | . | . | . |
| chr19 | 5388538  | 5388939        | .        | .                        | .                         | . | . | . |
| chr19 | 5408312  | 5408713 chr19  | 5408353  | 5408498 B1_Mur4          | SINE Alu                  | . | . | . |
| chr19 | 5408312  | 5408713 chr19  | 5408530  | 5408632 L2               | LINE L2                   | . | . | . |
| chr19 | 5460410  | 5460811        | .        | .                        | .                         | . | . | . |
| chr19 | 5490248  | 5490649        | .        | .                        | .                         | . | . | . |
| chr19 | 5601625  | 5602026 chr19  | 5601689  | 5601746 ID_B1            | SINE B4                   | . | . | . |
| chr19 | 5688816  | 5689217        | .        | .                        | .                         | . | . | . |
| chr19 | 5724598  | 5724999 chr19  | 5724904  | 5724992 MIRc             | SINE MIR                  | . | . | . |
| chr19 | 5731636  | 5732037        | .        | .                        | .                         | . | . | . |
| chr19 | 6077074  | 6077475        | .        | .                        | .                         | . | . | . |
| chr19 | 6084778  | 6085179        | .        | .                        | .                         | . | . | . |
| chr19 | 6118334  | 6118735        | .        | .                        | .                         | . | . | . |
| chr19 | 6127818  | 6128219        | .        | .                        | .                         | . | . | . |
| chr19 | 6141046  | 6141447        | .        | .                        | .                         | . | . | . |
| chr19 | 6236113  | 6236514        | .        | .                        | .                         | . | . | . |
| chr19 | 6334761  | 6335162        | .        | .                        | .                         | . | . | . |
| chr19 | 6341558  | 6341959        | .        | .                        | .                         | . | . | . |
| chr19 | 6984384  | 6984785        | .        | .                        | .                         | . | . | . |
| chr19 | 7016099  | 7016500        | .        | .                        | .                         | . | . | . |
| chr19 | 7048715  | 7049116        | .        | .                        | .                         | . | . | . |
| chr19 | 7114793  | 7115194        | .        | .                        | .                         | . | . | . |
| chr19 | 7131026  | 7131427        | .        | .                        | .                         | . | . | . |
| chr19 | 7280576  | 7280977        | .        | .                        | .                         | . | . | . |
| chr19 | 7291920  | 7292321        | .        | .                        | .                         | . | . | . |
| chr19 | 7491847  | 7492248 chr19  | 7492160  | 7492253 GC-rich          | Low_comple:Low_complexity | . | . | . |
| chr19 | 7568544  | 7568945        | .        | .                        | .                         | . | . | . |
| chr19 | 8797705  | 8798106 chr19  | 8798026  | 8798069 T-rich           | Low_comple:Low_complexity | . | . | . |
| chr19 | 8797705  | 8798106 chr19  | 8798069  | 8798217 B1_Mm            | SINE Alu                  | . | . | . |
| chr19 | 8810137  | 8810538 chr19  | 8810021  | 8810156 B1_Mur4          | SINE Alu                  | . | . | . |
| chr19 | 8810137  | 8810538 chr19  | 8810168  | 8810213 GA-rich          | Low_comple:Low_complexity | . | . | . |

|       |          |          |       |          |          |           |                |                |
|-------|----------|----------|-------|----------|----------|-----------|----------------|----------------|
| chr19 | 8872822  | 8873223  | chr19 | 8873146  | 8873210  | B1_Mus2   | SINE           | Alu            |
| chr19 | 8872822  | 8873223  | chr19 | 8873213  | 8873270  | A-rich    | Low_complexity | Low_complexity |
| chr19 | 8893356  | 8893757  | .     | .        | .        | .         | .              | .              |
| chr19 | 8924837  | 8925238  | chr19 | 8924772  | 8924872  | PB1D10    | SINE           | Alu            |
| chr19 | 8967240  | 8967641  | chr19 | 8967124  | 8967271  | B1_Mus1   | SINE           | Alu            |
| chr19 | 8994619  | 8995020  | chr19 | 8994946  | 8995005  | GC_rich   | Low_complexity | Low_complexity |
| chr19 | 9003803  | 9004204  | chr19 | 9004103  | 9004132  | GC_rich   | Low_complexity | Low_complexity |
| chr19 | 9028073  | 9028474  | .     | .        | .        | .         | .              | .              |
| chr19 | 9974138  | 9974539  | .     | .        | .        | .         | .              | .              |
| chr19 | 10278347 | 10278748 | .     | .        | .        | .         | .              | .              |
| chr19 | 10630058 | 10630459 | .     | .        | .        | .         | .              | .              |
| chr19 | 10651667 | 10652068 | .     | .        | .        | .         | .              | .              |
| chr19 | 10679826 | 10680227 | .     | .        | .        | .         | .              | .              |
| chr19 | 10969433 | 10969834 | chr19 | 10969553 | 10969573 | (A)n      | Simple_repeat  | Simple_repeat  |
| chr19 | 11023565 | 11023966 | .     | .        | .        | .         | .              | .              |
| chr19 | 11844564 | 11844965 | .     | .        | .        | .         | .              | .              |
| chr19 | 12576506 | 12576907 | chr19 | 12576488 | 12576554 | (CA)n     | Simple_repeat  | Simple_repeat  |
| chr19 | 12870512 | 12870913 | .     | .        | .        | .         | .              | .              |
| chr19 | 14672448 | 14672849 | .     | .        | .        | .         | .              | .              |
| chr19 | 18787413 | 18787814 | .     | .        | .        | .         | .              | .              |
| chr19 | 21727108 | 21727509 | .     | .        | .        | .         | .              | .              |
| chr19 | 23348124 | 23348525 | chr19 | 23348501 | 23348649 | (TG)n     | Simple_repeat  | Simple_repeat  |
| chr19 | 23761637 | 23762038 | chr19 | 23761869 | 23761891 | GC_rich   | Low_complexity | Low_complexity |
| chr19 | 27504319 | 27504720 | .     | .        | .        | .         | .              | .              |
| chr19 | 29064691 | 29065092 | .     | .        | .        | .         | .              | .              |
| chr19 | 29175705 | 29176106 | .     | .        | .        | .         | .              | .              |
| chr19 | 31157257 | 31157658 | .     | .        | .        | .         | .              | .              |
| chr19 | 32284995 | 32285396 | .     | .        | .        | .         | .              | .              |
| chr19 | 32786628 | 32787029 | .     | .        | .        | .         | .              | .              |
| chr19 | 34624926 | 34625327 | .     | .        | .        | .         | .              | .              |
| chr19 | 34996633 | 34997034 | .     | .        | .        | .         | .              | .              |
| chr19 | 36157970 | 36158371 | .     | .        | .        | .         | .              | .              |
| chr19 | 36908377 | 36908778 | .     | .        | .        | .         | .              | .              |
| chr19 | 36993184 | 36993585 | .     | .        | .        | .         | .              | .              |
| chr19 | 37281772 | 37282173 | chr19 | 37281879 | 37281928 | GC_rich   | Low_complexity | Low_complexity |
| chr19 | 37336843 | 37337244 | chr19 | 37337192 | 37337204 | B4A       | SINE           | B4             |
| chr19 | 37336843 | 37337244 | chr19 | 37337204 | 37337347 | B1F       | SINE           | Alu            |
| chr19 | 37338957 | 37339358 | chr19 | 37338868 | 37339291 | L1MC      | LINE           | L1             |
| chr19 | 37450595 | 37450996 | .     | .        | .        | .         | .              | .              |
| chr19 | 40686555 | 40686956 | .     | .        | .        | .         | .              | .              |
| chr19 | 41876528 | 41876929 | .     | .        | .        | .         | .              | .              |
| chr19 | 42007684 | 42008085 | .     | .        | .        | .         | .              | .              |
| chr19 | 42593044 | 42593445 | .     | .        | .        | .         | .              | .              |
| chr19 | 43749281 | 43749682 | chr19 | 43749285 | 43749316 | (CCG)n    | Simple_repeat  | Simple_repeat  |
| chr19 | 43827288 | 43827689 | .     | .        | .        | .         | .              | .              |
| chr19 | 44183447 | 44183848 | chr19 | 44183545 | 44183901 | RLTR15    | LTR            | ERVK           |
| chr19 | 44209919 | 44210320 | .     | .        | .        | .         | .              | .              |
| chr19 | 44367994 | 44368395 | .     | .        | .        | .         | .              | .              |
| chr19 | 44406282 | 44406683 | chr19 | 44406533 | 44406653 | MIRb      | SINE           | MIR            |
| chr19 | 44629829 | 44630230 | .     | .        | .        | .         | .              | .              |
| chr19 | 44637073 | 44637474 | .     | .        | .        | .         | .              | .              |
| chr19 | 45005876 | 45006277 | .     | .        | .        | .         | .              | .              |
| chr19 | 45080766 | 45081167 | .     | .        | .        | .         | .              | .              |
| chr19 | 45122630 | 45123031 | .     | .        | .        | .         | .              | .              |
| chr19 | 45437877 | 45438278 | .     | .        | .        | .         | .              | .              |
| chr19 | 45634850 | 45635251 | .     | .        | .        | .         | .              | .              |
| chr19 | 45858010 | 45858411 | .     | .        | .        | .         | .              | .              |
| chr19 | 46072938 | 46073339 | chr19 | 46073251 | 46073349 | MTC       | LTR            | MaLR           |
| chr19 | 46118818 | 46119219 | .     | .        | .        | .         | .              | .              |
| chr19 | 46130749 | 46131150 | .     | .        | .        | .         | .              | .              |
| chr19 | 46150182 | 46150583 | .     | .        | .        | .         | .              | .              |
| chr19 | 46226799 | 46227200 | .     | .        | .        | .         | .              | .              |
| chr19 | 46402811 | 46403212 | .     | .        | .        | .         | .              | .              |
| chr19 | 46413007 | 46413408 | .     | .        | .        | .         | .              | .              |
| chr19 | 46470121 | 46470522 | .     | .        | .        | .         | .              | .              |
| chr19 | 46673163 | 46673564 | chr19 | 46673557 | 46673708 | GA-rich   | Low_complexity | Low_complexity |
| chr19 | 46764453 | 46764854 | .     | .        | .        | .         | .              | .              |
| chr19 | 47125229 | 47125630 | chr19 | 47125181 | 47125240 | G-rich    | Low_complexity | Low_complexity |
| chr19 | 47251614 | 47252015 | chr19 | 47251712 | 47251759 | (TC)n     | Simple_repeat  | Simple_repeat  |
| chr19 | 47251614 | 47252015 | chr19 | 47251759 | 47251784 | (TG)n     | Simple_repeat  | Simple_repeat  |
| chr19 | 47251614 | 47252015 | chr19 | 47251938 | 47251961 | (CTGGGG)n | Simple_repeat  | Simple_repeat  |
| chr19 | 53403590 | 53403991 | chr19 | 53403962 | 53404062 | GC_rich   | Low_complexity | Low_complexity |
| chr19 | 53465066 | 53465467 | chr19 | 53465404 | 53465521 | B1_Mur1   | SINE           | Alu            |
| chr19 | 54018782 | 54019183 | .     | .        | .        | .         | .              | .              |
| chr19 | 57434941 | 57435342 | chr19 | 57435336 | 57435450 | (CCCCG)n  | Simple_repeat  | Simple_repeat  |
| chr19 | 57527181 | 57527582 | .     | .        | .        | .         | .              | .              |
| chr19 | 60019405 | 60019806 | chr19 | 60019506 | 60019531 | GC_rich   | Low_complexity | Low_complexity |
| chr19 | 60965840 | 60966241 | chr19 | 60966180 | 60966298 | G-rich    | Low_complexity | Low_complexity |
| chr2  | 3429893  | 3430294  | .     | .        | .        | .         | .              | .              |
| chr2  | 4802718  | 4803119  | chr2  | 4802788  | 4802808  | (T)n      | Simple_repeat  | Simple_repeat  |
| chr2  | 4802718  | 4803119  | chr2  | 4803105  | 4803147  | (CCG)n    | Simple_repeat  | Simple_repeat  |
| chr2  | 5766030  | 5766431  | .     | .        | .        | .         | .              | .              |
| chr2  | 6134201  | 6134602  | .     | .        | .        | .         | .              | .              |
| chr2  | 11524724 | 11525125 | .     | .        | .        | .         | .              | .              |
| chr2  | 11699189 | 11699590 | .     | .        | .        | .         | .              | .              |
| chr2  | 13995487 | 13995888 | .     | .        | .        | .         | .              | .              |
| chr2  | 17977929 | 17978330 | .     | .        | .        | .         | .              | .              |
| chr2  | 22750791 | 22751192 | .     | .        | .        | .         | .              | .              |
| chr2  | 22895659 | 22896060 | chr2  | 22895716 | 22895770 | CT-rich   | Low_complexity | Low_complexity |
| chr2  | 22923526 | 22923927 | .     | .        | .        | .         | .              | .              |
| chr2  | 23011800 | 23012201 | .     | .        | .        | .         | .              | .              |
| chr2  | 25283820 | 25284221 | chr2  | 25284192 | 25284288 | (CGCGG)n  | Simple_repeat  | Simple_repeat  |
| chr2  | 25877290 | 25877691 | chr2  | 25877624 | 25877803 | ID_B1     | SINE           | B4             |
| chr2  | 26236014 | 26236415 | .     | .        | .        | .         | .              | .              |
| chr2  | 26495638 | 26496039 | .     | .        | .        | .         | .              | .              |

|      |           |           |      |          |          |            |             |                |   |
|------|-----------|-----------|------|----------|----------|------------|-------------|----------------|---|
| chr2 | 26758241  | 26758642  | .    | .        | .        | .          | .           | .              | . |
| chr2 | 26766156  | 26766557  | .    | .        | .        | .          | .           | .              | . |
| chr2 | 26819691  | 26820092  | .    | .        | .        | .          | .           | .              | . |
| chr2 | 26865298  | 26865699  | chr2 | 26865517 | 26865557 | GC_rich    | Low_comple  | Low_complexity |   |
| chr2 | 27102655  | 27103056  | .    | .        | .        | .          | .           | .              | . |
| chr2 | 27331022  | 27331423  | chr2 | 27331031 | 27331063 | (CCG)n     | Simple_repe | Simple_repeat  |   |
| chr2 | 27331022  | 27331423  | chr2 | 27331326 | 27331385 | (CCCC)n    | Simple_repe | Simple_repeat  |   |
| chr2 | 27370372  | 27370773  | chr2 | 27370769 | 27370798 | GC_rich    | Low_comple  | Low_complexity |   |
| chr2 | 28695652  | 28696053  | .    | .        | .        | .          | .           | .              | . |
| chr2 | 29202090  | 29202491  | .    | .        | .        | .          | .           | .              | . |
| chr2 | 29643061  | 29643462  | chr2 | 29643363 | 29643495 | ID_B1      | SINE        | B4             |   |
| chr2 | 29657909  | 29658310  | .    | .        | .        | .          | .           | .              | . |
| chr2 | 29682668  | 29683069  | .    | .        | .        | .          | .           | .              | . |
| chr2 | 29790729  | 29791130  | .    | .        | .        | .          | .           | .              | . |
| chr2 | 29904266  | 29904667  | .    | .        | .        | .          | .           | .              | . |
| chr2 | 29949357  | 29949758  | chr2 | 29949622 | 29949706 | MIR        | SINE        | MIR            |   |
| chr2 | 30092905  | 30093306  | .    | .        | .        | .          | .           | .              | . |
| chr2 | 30219331  | 30219732  | chr2 | 30219347 | 30219402 | (TG)n      | Simple_repe | Simple_repeat  |   |
| chr2 | 30683665  | 30684066  | .    | .        | .        | .          | .           | .              | . |
| chr2 | 30837463  | 30837864  | .    | .        | .        | .          | .           | .              | . |
| chr2 | 31007660  | 31008061  | .    | .        | .        | .          | .           | .              | . |
| chr2 | 31543535  | 31543936  | .    | .        | .        | .          | .           | .              | . |
| chr2 | 31829755  | 31830156  | .    | .        | .        | .          | .           | .              | . |
| chr2 | 31950834  | 31951235  | .    | .        | .        | .          | .           | .              | . |
| chr2 | 32091930  | 32092331  | .    | .        | .        | .          | .           | .              | . |
| chr2 | 32143609  | 32144010  | .    | .        | .        | .          | .           | .              | . |
| chr2 | 32173049  | 32173450  | .    | .        | .        | .          | .           | .              | . |
| chr2 | 32208738  | 32209139  | .    | .        | .        | .          | .           | .              | . |
| chr2 | 32218397  | 32218798  | .    | .        | .        | .          | .           | .              | . |
| chr2 | 32426105  | 32426506  | .    | .        | .        | .          | .           | .              | . |
| chr2 | 32480735  | 32481136  | chr2 | 32480862 | 32480921 | CT-rich    | Low_comple  | Low_complexity |   |
| chr2 | 32549677  | 32550078  | chr2 | 32549683 | 32549709 | (CCCCG)n   | Simple_repe | Simple_repeat  |   |
| chr2 | 32568162  | 32568563  | chr2 | 32568190 | 32568239 | (CCG)n     | Simple_repe | Simple_repeat  |   |
| chr2 | 32568162  | 32568563  | chr2 | 32568407 | 32568449 | (CCG)n     | Simple_repe | Simple_repeat  |   |
| chr2 | 32612544  | 32612945  | .    | .        | .        | .          | .           | .              | . |
| chr2 | 33323875  | 33324276  | .    | .        | .        | .          | .           | .              | . |
| chr2 | 34609798  | 34610199  | chr2 | 34609951 | 34609972 | GC_rich    | Low_comple  | Low_complexity |   |
| chr2 | 34609798  | 34610199  | chr2 | 34610145 | 34610238 | (TC)n      | Simple_repe | Simple_repeat  |   |
| chr2 | 34627165  | 34627566  | .    | .        | .        | .          | .           | .              | . |
| chr2 | 34726325  | 34726726  | .    | .        | .        | .          | .           | .              | . |
| chr2 | 37278559  | 37278960  | .    | .        | .        | .          | .           | .              | . |
| chr2 | 37286231  | 37286632  | .    | .        | .        | .          | .           | .              | . |
| chr2 | 37298530  | 37298931  | .    | .        | .        | .          | .           | .              | . |
| chr2 | 38142763  | 38143164  | .    | .        | .        | .          | .           | .              | . |
| chr2 | 38499236  | 38499637  | .    | .        | .        | .          | .           | .              | . |
| chr2 | 38860544  | 38860945  | .    | .        | .        | .          | .           | .              | . |
| chr2 | 39081800  | 39082201  | chr2 | 39081775 | 39081828 | (CCG)n     | Simple_repe | Simple_repeat  |   |
| chr2 | 48804747  | 48805148  | .    | .        | .        | .          | .           | .              | . |
| chr2 | 49306841  | 49307242  | chr2 | 49306944 | 49306982 | (GGGA)n    | Simple_repe | Simple_repeat  |   |
| chr2 | 49306841  | 49307242  | chr2 | 49307125 | 49307147 | GC_rich    | Low_comple  | Low_complexity |   |
| chr2 | 50151996  | 50152397  | chr2 | 50151979 | 50152000 | (CCGGG)n   | Simple_repe | Simple_repeat  |   |
| chr2 | 52716519  | 52716920  | chr2 | 52716736 | 52716778 | GC_rich    | Low_comple  | Low_complexity |   |
| chr2 | 52716519  | 52716920  | chr2 | 52716893 | 52716923 | GC_rich    | Low_comple  | Low_complexity |   |
| chr2 | 53050104  | 53050505  | .    | .        | .        | .          | .           | .              | . |
| chr2 | 61430996  | 61431397  | .    | .        | .        | .          | .           | .              | . |
| chr2 | 61549656  | 61550057  | chr2 | 61549710 | 61549730 | (C)n       | Simple_repe | Simple_repeat  |   |
| chr2 | 65506541  | 65506942  | chr2 | 65506767 | 65506796 | AT_rich    | Low_comple  | Low_complexity |   |
| chr2 | 69044145  | 69044546  | .    | .        | .        | .          | .           | .              | . |
| chr2 | 69551404  | 69551805  | chr2 | 69551795 | 69551882 | RSINE1     | SINE        | B4             |   |
| chr2 | 69560640  | 69561041  | .    | .        | .        | .          | .           | .              | . |
| chr2 | 69699461  | 69699862  | chr2 | 69699836 | 69699865 | GC_rich    | Low_comple  | Low_complexity |   |
| chr2 | 69723555  | 69723956  | .    | .        | .        | .          | .           | .              | . |
| chr2 | 70499413  | 70499814  | .    | .        | .        | .          | .           | .              | . |
| chr2 | 70893538  | 70893939  | .    | .        | .        | .          | .           | .              | . |
| chr2 | 71049529  | 71049930  | .    | .        | .        | .          | .           | .              | . |
| chr2 | 73150456  | 73150857  | .    | .        | .        | .          | .           | .              | . |
| chr2 | 73730496  | 73730897  | .    | .        | .        | .          | .           | .              | . |
| chr2 | 74416804  | 74417205  | .    | .        | .        | .          | .           | .              | . |
| chr2 | 75670050  | 75670451  | chr2 | 75670116 | 75670174 | (CGGGG)n   | Simple_repe | Simple_repeat  |   |
| chr2 | 75670050  | 75670451  | chr2 | 75670397 | 75670420 | GC_rich    | Low_comple  | Low_complexity |   |
| chr2 | 75776503  | 75776904  | .    | .        | .        | .          | .           | .              | . |
| chr2 | 75819887  | 75820288  | .    | .        | .        | .          | .           | .              | . |
| chr2 | 76485600  | 76486001  | .    | .        | .        | .          | .           | .              | . |
| chr2 | 76513141  | 76513542  | chr2 | 76513527 | 76513621 | GC_rich    | Low_comple  | Low_complexity |   |
| chr2 | 77784271  | 77784672  | .    | .        | .        | .          | .           | .              | . |
| chr2 | 80155611  | 80156012  | chr2 | 80155825 | 80155856 | GC_rich    | Low_comple  | Low_complexity |   |
| chr2 | 80478750  | 80479151  | chr2 | 80478661 | 80478801 | B1_Mus1    | SINE        | Alu            |   |
| chr2 | 83484444  | 83484845  | .    | .        | .        | .          | .           | .              | . |
| chr2 | 84316769  | 84317170  | chr2 | 84316782 | 84317019 | RLTR42     | LTR         | ERVK           |   |
| chr2 | 84316769  | 84317170  | chr2 | 84317024 | 84318538 | RLTR42-int | LTR         | ERVK           |   |
| chr2 | 84518156  | 84518557  | .    | .        | .        | .          | .           | .              | . |
| chr2 | 84567323  | 84567724  | .    | .        | .        | .          | .           | .              | . |
| chr2 | 84666934  | 84667335  | .    | .        | .        | .          | .           | .              | . |
| chr2 | 90893893  | 90894294  | chr2 | 90893836 | 90893974 | B1_Mus2    | SINE        | Alu            |   |
| chr2 | 90893893  | 90894294  | chr2 | 90893838 | 90894027 | B4         | SINE        | B4             |   |
| chr2 | 90910380  | 90910781  | chr2 | 90910385 | 90910419 | (CCCCG)n   | Simple_repe | Simple_repeat  |   |
| chr2 | 91023350  | 91023751  | .    | .        | .        | .          | .           | .              | . |
| chr2 | 91042770  | 91043171  | .    | .        | .        | .          | .           | .              | . |
| chr2 | 91105279  | 91105680  | .    | .        | .        | .          | .           | .              | . |
| chr2 | 91284686  | 91285087  | .    | .        | .        | .          | .           | .              | . |
| chr2 | 92031972  | 92032373  | .    | .        | .        | .          | .           | .              | . |
| chr2 | 93850802  | 93851203  | .    | .        | .        | .          | .           | .              | . |
| chr2 | 94246668  | 94247069  | .    | .        | .        | .          | .           | .              | . |
| chr2 | 101469033 | 101469434 | .    | .        | .        | .          | .           | .              | . |
| chr2 | 101726160 | 101726561 | .    | .        | .        | .          | .           | .              | . |



|      |           |           |      |           |           |         |                           |           |   |
|------|-----------|-----------|------|-----------|-----------|---------|---------------------------|-----------|---|
| chr2 | 103601346 | 103601747 | .    | .         | .         | .       | .                         | .         | . |
| chr2 | 104430332 | 104430733 | chr2 | 104430672 | 104430701 | (CGG)n  | Simple_repe:Simple_repeat | .         | . |
| chr2 | 104656992 | 104657393 | chr2 | 104656992 | 104657050 | GC_rich | Low_comple:Low_complexity | .         | . |
| chr2 | 104656992 | 104657393 | chr2 | 104657157 | 104657206 | GC_rich | Low_comple:Low_complexity | .         | . |
| chr2 | 104857021 | 104857422 | .    | .         | .         | .       | .                         | .         | . |
| chr2 | 109857779 | 109858180 | .    | .         | .         | .       | .                         | .         | . |
| chr2 | 112101832 | 112102233 | .    | .         | .         | .       | .                         | .         | . |
| chr2 | 112105464 | 112105865 | chr2 | 112105856 | 112105902 | GC_rich | Low_comple:Low_complexity | .         | . |
| chr2 | 112219207 | 112219608 | chr2 | 112219376 | 112219398 | GC_rich | Low_comple:Low_complexity | .         | . |
| chr2 | 112294979 | 112295380 | .    | .         | .         | .       | .                         | .         | . |
| chr2 | 114000872 | 114001273 | .    | .         | .         | .       | .                         | .         | . |
| chr2 | 114027029 | 114027430 | .    | .         | .         | .       | .                         | .         | . |
| chr2 | 115406937 | 115407338 | .    | .         | .         | .       | .                         | .         | . |
| chr2 | 118423698 | 118424099 | .    | .         | .         | .       | .                         | .         | . |
| chr2 | 118938128 | 118938529 | .    | .         | .         | .       | .                         | .         | . |
| chr2 | 118999899 | 119000300 | .    | .         | .         | .       | .                         | .         | . |
| chr2 | 119034467 | 119034868 | .    | .         | .         | .       | .                         | .         | . |
| chr2 | 119114204 | 119114605 | .    | .         | .         | .       | .                         | .         | . |
| chr2 | 120676209 | 120676610 | .    | .         | .         | .       | .                         | .         | . |
| chr2 | 121282666 | 121283067 | .    | .         | .         | .       | .                         | .         | . |
| chr2 | 121299610 | 121300011 | .    | .         | .         | .       | .                         | .         | . |
| chr2 | 121332254 | 121332655 | .    | .         | .         | .       | .                         | .         | . |
| chr2 | 121943985 | 121944386 | .    | .         | .         | .       | .                         | .         | . |
| chr2 | 122456118 | 122456519 | .    | .         | .         | .       | .                         | .         | . |
| chr2 | 125684602 | 125685003 | .    | .         | .         | .       | .                         | .         | . |
| chr2 | 125973446 | 125973847 | chr2 | 125973499 | 125973557 | (TTTG)n | Simple_repe:Simple_repeat | .         | . |
| chr2 | 125973446 | 125973847 | chr2 | 125973571 | 125973681 | PB1D10  | SINE                      | Alu       | . |
| chr2 | 126501067 | 126501468 | .    | .         | .         | .       | .                         | .         | . |
| chr2 | 126532853 | 126533254 | .    | .         | .         | .       | .                         | .         | . |
| chr2 | 127033811 | 127034212 | .    | .         | .         | .       | .                         | .         | . |
| chr2 | 127073334 | 127073735 | .    | .         | .         | .       | .                         | .         | . |
| chr2 | 127410306 | 127410707 | .    | .         | .         | .       | .                         | .         | . |
| chr2 | 128254958 | 128255359 | chr2 | 128254991 | 128255028 | (A)n    | Simple_repe:Simple_repeat | .         | . |
| chr2 | 128512898 | 128513299 | .    | .         | .         | .       | .                         | .         | . |
| chr2 | 128891327 | 128891728 | chr2 | 128891301 | 128891379 | ID      | SINE                      | ID        | . |
| chr2 | 128891327 | 128891728 | chr2 | 128891653 | 128891699 | GC_rich | Low_comple:Low_complexity | .         | . |
| chr2 | 128926509 | 128926910 | chr2 | 128926488 | 128926613 | B1_Mur3 | SINE                      | Alu       | . |
| chr2 | 128926509 | 128926910 | chr2 | 128926613 | 128926631 | ID_B1   | SINE                      | B4        | . |
| chr2 | 128955185 | 128955586 | .    | .         | .         | .       | .                         | .         | . |
| chr2 | 130100320 | 130100721 | chr2 | 130100553 | 130100576 | GC_rich | Low_comple:Low_complexity | .         | . |
| chr2 | 130389268 | 130389669 | .    | .         | .         | .       | .                         | .         | . |
| chr2 | 131000408 | 131000809 | .    | .         | .         | .       | .                         | .         | . |
| chr2 | 131035855 | 131036256 | .    | .         | .         | .       | .                         | .         | . |
| chr2 | 131737027 | 131737428 | chr2 | 131737125 | 131737245 | B1F     | SINE                      | Alu       | . |
| chr2 | 132424871 | 132425272 | chr2 | 132424848 | 132424945 | PB1D10  | SINE                      | Alu       | . |
| chr2 | 136717715 | 136718116 | .    | .         | .         | .       | .                         | .         | . |
| chr2 | 139996118 | 139996519 | .    | .         | .         | .       | .                         | .         | . |
| chr2 | 142888573 | 142888974 | .    | .         | .         | .       | .                         | .         | . |
| chr2 | 144096503 | 144096904 | .    | .         | .         | .       | .                         | .         | . |
| chr2 | 144284839 | 144285240 | .    | .         | .         | .       | .                         | .         | . |
| chr2 | 144353188 | 144353589 | .    | .         | .         | .       | .                         | .         | . |
| chr2 | 144376396 | 144376797 | .    | .         | .         | .       | .                         | .         | . |
| chr2 | 144419568 | 144419969 | .    | .         | .         | .       | .                         | .         | . |
| chr2 | 145728754 | 145729155 | .    | .         | .         | .       | .                         | .         | . |
| chr2 | 145760555 | 145760956 | .    | .         | .         | .       | .                         | .         | . |
| chr2 | 146337852 | 146338253 | .    | .         | .         | .       | .                         | .         | . |
| chr2 | 146681418 | 146681819 | .    | .         | .         | .       | .                         | .         | . |
| chr2 | 146838527 | 146838928 | .    | .         | .         | .       | .                         | .         | . |
| chr2 | 148498073 | 148498474 | .    | .         | .         | .       | .                         | .         | . |
| chr2 | 148558027 | 148558428 | chr2 | 148558386 | 148558458 | (GA)n   | Simple_repe:Simple_repeat | .         | . |
| chr2 | 149962271 | 149962672 | .    | .         | .         | .       | .                         | .         | . |
| chr2 | 150730360 | 150730761 | .    | .         | .         | .       | .                         | .         | . |
| chr2 | 151319736 | 151320137 | .    | .         | .         | .       | .                         | .         | . |
| chr2 | 151566883 | 151567284 | .    | .         | .         | .       | .                         | .         | . |
| chr2 | 152052053 | 152052454 | .    | .         | .         | .       | .                         | .         | . |
| chr2 | 152157954 | 152158355 | .    | .         | .         | .       | .                         | .         | . |
| chr2 | 152221756 | 152222157 | .    | .         | .         | .       | .                         | .         | . |
| chr2 | 152240332 | 152240733 | .    | .         | .         | .       | .                         | .         | . |
| chr2 | 152673357 | 152673758 | chr2 | 152673342 | 152673497 | ID_B1   | SINE                      | B4        | . |
| chr2 | 152788258 | 152788659 | chr2 | 152788600 | 152788676 | (TCCA)n | Simple_repe:Simple_repeat | .         | . |
| chr2 | 152986861 | 152987262 | .    | .         | .         | .       | .                         | .         | . |
| chr2 | 153066903 | 153067304 | chr2 | 153067204 | 153067229 | GC_rich | Low_comple:Low_complexity | .         | . |
| chr2 | 153116976 | 153117377 | .    | .         | .         | .       | .                         | .         | . |
| chr2 | 153171250 | 153171651 | chr2 | 153171577 | 153171616 | (CA)n   | Simple_repe:Simple_repeat | .         | . |
| chr2 | 154438791 | 154439192 | chr2 | 154439175 | 154439261 | GC_rich | Low_comple:Low_complexity | .         | . |
| chr2 | 154482410 | 154482811 | chr2 | 154482734 | 154482849 | G-rich  | Low_comple:Low_complexity | .         | . |
| chr2 | 154718497 | 154718898 | .    | .         | .         | .       | .                         | .         | . |
| chr2 | 154899688 | 154900089 | .    | .         | .         | .       | .                         | .         | . |
| chr2 | 154958977 | 154959378 | chr2 | 154958802 | 154958986 | MER5A   | DNA                       | MER1_type | . |
| chr2 | 154958977 | 154959378 | chr2 | 154959022 | 154959093 | GA-rich | Low_comple:Low_complexity | .         | . |
| chr2 | 155183063 | 155183464 | .    | .         | .         | .       | .                         | .         | . |
| chr2 | 155517980 | 155518381 | .    | .         | .         | .       | .                         | .         | . |
| chr2 | 155555017 | 155555418 | .    | .         | .         | .       | .                         | .         | . |
| chr2 | 155644938 | 155645339 | chr2 | 155645330 | 155645443 | B1F2    | SINE                      | Alu       | . |
| chr2 | 155755605 | 155756006 | .    | .         | .         | .       | .                         | .         | . |
| chr2 | 155969736 | 155970137 | .    | .         | .         | .       | .                         | .         | . |
| chr2 | 156005813 | 156006214 | .    | .         | .         | .       | .                         | .         | . |
| chr2 | 156373098 | 156373499 | .    | .         | .         | .       | .                         | .         | . |
| chr2 | 156547979 | 156548380 | .    | .         | .         | .       | .                         | .         | . |
| chr2 | 156817687 | 156818088 | chr2 | 156817764 | 156817808 | (CAG)n  | Simple_repe:Simple_repeat | .         | . |
| chr2 | 157030099 | 157030500 | .    | .         | .         | .       | .                         | .         | . |
| chr2 | 157193160 | 157193561 | chr2 | 157193124 | 157193204 | PB1D7   | SINE                      | Alu       | . |
| chr2 | 157392235 | 157392636 | chr2 | 157392609 | 157392650 | MIRm    | SINE                      | MIR       | . |
| chr2 | 157854189 | 157854590 | .    | .         | .         | .       | .                         | .         | . |
| chr2 | 158187065 | 158187466 | chr2 | 158187373 | 158187403 | AT-rich | Low_comple:Low_complexity | .         | . |



|      |           |           |      |           |           |          |                           |      |   |
|------|-----------|-----------|------|-----------|-----------|----------|---------------------------|------|---|
| chr3 | 89070247  | 89070648  | .    | .         | .         | .        | .                         | .    | . |
| chr3 | 89215700  | 89216101  | .    | .         | .         | .        | .                         | .    | . |
| chr3 | 89222352  | 89222753  | .    | .         | .         | .        | .                         | .    | . |
| chr3 | 89577051  | 89577452  | chr3 | 89577422  | 89577488  | GC-rich  | Low_comple:Low_complexity |      |   |
| chr3 | 89856549  | 89856950  | chr3 | 89856600  | 89856626  | (CCCCG)n | Simple_repe:Simple_repeat |      |   |
| chr3 | 89856549  | 89856950  | chr3 | 89856826  | 89856848  | (T)n     | Simple_repe:Simple_repeat |      |   |
| chr3 | 90017508  | 90017909  | .    | .         | .         | .        | .                         | .    | . |
| chr3 | 90035298  | 90035699  | .    | .         | .         | .        | .                         | .    | . |
| chr3 | 90057901  | 90058302  | chr3 | 90058260  | 90058345  | G-rich   | Low_comple:Low_complexity |      |   |
| chr3 | 90294787  | 90295188  | chr3 | 90295142  | 90295297  | (TTTC)n  | Simple_repe:Simple_repeat |      |   |
| chr3 | 93360537  | 93360938  | chr3 | 93360512  | 93360546  | (TTTG)n  | Simple_repe:Simple_repeat |      |   |
| chr3 | 93360537  | 93360938  | chr3 | 93360752  | 93360795  | (GA)n    | Simple_repe:Simple_repeat |      |   |
| chr3 | 94386496  | 94386897  | chr3 | 94386518  | 94386570  | GC-rich  | Low_comple:Low_complexity |      |   |
| chr3 | 94386496  | 94386897  | chr3 | 94386794  | 94386915  | B1_Mus2  | SINE                      | Alu  |   |
| chr3 | 94846382  | 94846783  | .    | .         | .         | .        | .                         | .    | . |
| chr3 | 94914759  | 94915160  | chr3 | 94914628  | 94914762  | B1_Mur1  | SINE                      | Alu  |   |
| chr3 | 94937776  | 94938177  | chr3 | 94938062  | 94938089  | AT-rich  | Low_comple:Low_complexity |      |   |
| chr3 | 95021651  | 95022052  | .    | .         | .         | .        | .                         | .    | . |
| chr3 | 95031924  | 95032325  | .    | .         | .         | .        | .                         | .    | . |
| chr3 | 95085611  | 95086012  | chr3 | 95086010  | 95086105  | PB1D10   | SINE                      | Alu  |   |
| chr3 | 95161031  | 95161432  | chr3 | 95161400  | 95161430  | AT-rich  | Low_comple:Low_complexity |      |   |
| chr3 | 95543383  | 95543784  | .    | .         | .         | .        | .                         | .    | . |
| chr3 | 95697576  | 95697977  | .    | .         | .         | .        | .                         | .    | . |
| chr3 | 95861621  | 95862022  | .    | .         | .         | .        | .                         | .    | . |
| chr3 | 95964161  | 95964562  | .    | .         | .         | .        | .                         | .    | . |
| chr3 | 95976247  | 95976648  | chr3 | 95976382  | 95976410  | GC-rich  | Low_comple:Low_complexity |      |   |
| chr3 | 96001412  | 96001813  | chr3 | 96001796  | 96001887  | ID_B1    | SINE                      | B4   |   |
| chr3 | 96073332  | 96073733  | .    | .         | .         | .        | .                         | .    | . |
| chr3 | 96433635  | 96434036  | chr3 | 96433635  | 96433710  | B1_Mur1  | SINE                      | Alu  |   |
| chr3 | 96962468  | 96962869  | .    | .         | .         | .        | .                         | .    | . |
| chr3 | 97413925  | 97414326  | chr3 | 97413951  | 97413981  | GC-rich  | Low_comple:Low_complexity |      |   |
| chr3 | 97571755  | 97572156  | .    | .         | .         | .        | .                         | .    | . |
| chr3 | 98186116  | 98186517  | .    | .         | .         | .        | .                         | .    | . |
| chr3 | 100725786 | 100726187 | .    | .         | .         | .        | .                         | .    | . |
| chr3 | 102824766 | 102825167 | .    | .         | .         | .        | .                         | .    | . |
| chr3 | 103613191 | 103613592 | chr3 | 103613419 | 103613441 | GC-rich  | Low_comple:Low_complexity |      |   |
| chr3 | 103718121 | 103718522 | .    | .         | .         | .        | .                         | .    | . |
| chr3 | 104667162 | 104667563 | .    | .         | .         | .        | .                         | .    | . |
| chr3 | 104857670 | 104858071 | chr3 | 104857647 | 104857739 | PB1D10   | SINE                      | Alu  |   |
| chr3 | 104857670 | 104858071 | chr3 | 104857659 | 104857779 | ID_B1    | SINE                      | B4   |   |
| chr3 | 105490207 | 105490608 | .    | .         | .         | .        | .                         | .    | . |
| chr3 | 106524269 | 106524670 | .    | .         | .         | .        | .                         | .    | . |
| chr3 | 107136711 | 107137112 | .    | .         | .         | .        | .                         | .    | . |
| chr3 | 107563071 | 107563472 | chr3 | 107563245 | 107563282 | (CA)n    | Simple_repe:Simple_repeat |      |   |
| chr3 | 108013344 | 108013745 | chr3 | 108013391 | 108013438 | GC-rich  | Low_comple:Low_complexity |      |   |
| chr3 | 108059797 | 108060198 | .    | .         | .         | .        | .                         | .    | . |
| chr3 | 108187391 | 108187792 | chr3 | 108187546 | 108187693 | RMER17C  | LTR                       | ERVK |   |
| chr3 | 108187391 | 108187792 | chr3 | 108187681 | 108187746 | PB1D7    | SINE                      | Alu  |   |
| chr3 | 108340194 | 108340595 | .    | .         | .         | .        | .                         | .    | . |
| chr3 | 108357539 | 108357940 | chr3 | 108357865 | 108357940 | PB1D10   | SINE                      | Alu  |   |
| chr3 | 108365157 | 108365558 | .    | .         | .         | .        | .                         | .    | . |
| chr3 | 110053772 | 110054173 | chr3 | 110054129 | 110054505 | MT2B2    | LTR                       | ERVL |   |
| chr3 | 113332874 | 113333275 | .    | .         | .         | .        | .                         | .    | . |
| chr3 | 115590775 | 115591176 | .    | .         | .         | .        | .                         | .    | . |
| chr3 | 115710967 | 115711368 | .    | .         | .         | .        | .                         | .    | . |
| chr3 | 116210874 | 116211275 | .    | .         | .         | .        | .                         | .    | . |
| chr3 | 116297709 | 116298110 | .    | .         | .         | .        | .                         | .    | . |
| chr3 | 120994756 | 120995157 | .    | .         | .         | .        | .                         | .    | . |
| chr3 | 121977083 | 121977484 | .    | .         | .         | .        | .                         | .    | . |
| chr3 | 122322587 | 122322988 | chr3 | 122322646 | 122322677 | (GGGA)n  | Simple_repe:Simple_repeat |      |   |
| chr3 | 122322587 | 122322988 | chr3 | 122322738 | 122322779 | GC-rich  | Low_comple:Low_complexity |      |   |
| chr3 | 123211091 | 123211492 | .    | .         | .         | .        | .                         | .    | . |
| chr3 | 127483094 | 127483495 | .    | .         | .         | .        | .                         | .    | . |
| chr3 | 129534110 | 129534511 | .    | .         | .         | .        | .                         | .    | . |
| chr3 | 130433112 | 130433513 | .    | .         | .         | .        | .                         | .    | . |
| chr3 | 132754626 | 132755027 | .    | .         | .         | .        | .                         | .    | . |
| chr3 | 133903081 | 133903482 | chr3 | 133903054 | 133903118 | (CGG)n   | Simple_repe:Simple_repeat |      |   |
| chr3 | 134943918 | 134944319 | .    | .         | .         | .        | .                         | .    | . |
| chr3 | 137581256 | 137581657 | chr3 | 137581416 | 137581439 | GC-rich  | Low_comple:Low_complexity |      |   |
| chr3 | 137806267 | 137806668 | .    | .         | .         | .        | .                         | .    | . |
| chr3 | 138189928 | 138190329 | chr3 | 138190054 | 138190084 | (A)n     | Simple_repe:Simple_repeat |      |   |
| chr3 | 142222484 | 142222885 | .    | .         | .         | .        | .                         | .    | . |
| chr3 | 144781700 | 144782101 | .    | .         | .         | .        | .                         | .    | . |
| chr3 | 146184216 | 146184617 | chr3 | 146184492 | 146184633 | B1_Mus2  | SINE                      | Alu  |   |
| chr3 | 151856648 | 151857049 | .    | .         | .         | .        | .                         | .    | . |
| chr3 | 154756026 | 154756427 | chr3 | 154756364 | 154756391 | (CCCCG)n | Simple_repe:Simple_repeat |      |   |
| chr3 | 157694564 | 157694965 | .    | .         | .         | .        | .                         | .    | . |
| chr4 | 3762589   | 3762990   | .    | .         | .         | .        | .                         | .    | . |
| chr4 | 4720320   | 4720721   | .    | .         | .         | .        | .                         | .    | . |
| chr4 | 11003192  | 11003593  | .    | .         | .         | .        | .                         | .    | . |
| chr4 | 11412914  | 11413315  | .    | .         | .         | .        | .                         | .    | . |
| chr4 | 12014919  | 12015320  | chr4 | 12015170  | 12015197  | (A)n     | Simple_repe:Simple_repeat |      |   |
| chr4 | 19969062  | 19969463  | chr4 | 19969043  | 19969151  | (CCCCG)n | Simple_repe:Simple_repeat |      |   |
| chr4 | 21774950  | 21775351  | .    | .         | .         | .        | .                         | .    | . |
| chr4 | 33397137  | 33397538  | .    | .         | .         | .        | .                         | .    | . |
| chr4 | 34497523  | 34497924  | chr4 | 34497622  | 34497644  | (T)n     | Simple_repe:Simple_repeat |      |   |
| chr4 | 41222308  | 41222709  | .    | .         | .         | .        | .                         | .    | . |
| chr4 | 41450169  | 41450570  | chr4 | 41450512  | 41450853  | ORR1C2   | LTR                       | MaLR |   |
| chr4 | 43023200  | 43023601  | .    | .         | .         | .        | .                         | .    | . |
| chr4 | 43044162  | 43044563  | .    | .         | .         | .        | .                         | .    | . |
| chr4 | 43575279  | 43575680  | .    | .         | .         | .        | .                         | .    | . |
| chr4 | 44085391  | 44085792  | .    | .         | .         | .        | .                         | .    | . |
| chr4 | 44768956  | 44769357  | .    | .         | .         | .        | .                         | .    | . |
| chr4 | 45309788  | 45310189  | .    | .         | .         | .        | .                         | .    | . |
| chr4 | 46151243  | 46151644  | .    | .         | .         | .        | .                         | .    | . |

|      |           |           |      |           |           |          |             |                |   |
|------|-----------|-----------|------|-----------|-----------|----------|-------------|----------------|---|
| chr4 | 46401849  | 46402250  | .    | .         | .         | .        | .           | .              | . |
| chr4 | 48292360  | 48292761  | .    | .         | .         | .        | .           | .              | . |
| chr4 | 49533838  | 49534239  | .    | .         | .         | .        | .           | .              | . |
| chr4 | 55543581  | 55543982  | .    | .         | .         | .        | .           | .              | . |
| chr4 | 56815003  | 56815404  | .    | .         | .         | .        | .           | .              | . |
| chr4 | 56960193  | 56960594  | .    | .         | .         | .        | .           | .              | . |
| chr4 | 57314695  | 57315096  | .    | .         | .         | .        | .           | .              | . |
| chr4 | 58923808  | 58924209  | .    | .         | .         | .        | .           | .              | . |
| chr4 | 58956201  | 58956602  | .    | .         | .         | .        | .           | .              | . |
| chr4 | 59796616  | 59797017  | chr4 | 59796993  | 59797038  | (TCTG)n  | Simple_repe | Simple_repeat  |   |
| chr4 | 61869377  | 61869778  | .    | .         | .         | .        | .           | .              | . |
| chr4 | 61947238  | 61947639  | .    | .         | .         | .        | .           | .              | . |
| chr4 | 62021560  | 62021961  | .    | .         | .         | .        | .           | .              | . |
| chr4 | 62069510  | 62069911  | .    | .         | .         | .        | .           | .              | . |
| chr4 | 62186043  | 62186444  | .    | .         | .         | .        | .           | .              | . |
| chr4 | 63064386  | 63064787  | .    | .         | .         | .        | .           | .              | . |
| chr4 | 63219914  | 63220315  | chr4 | 63220053  | 63220132  | MIR3     | SINE        | MIR            |   |
| chr4 | 65265754  | 65266155  | .    | .         | .         | .        | .           | .              | . |
| chr4 | 66489646  | 66490047  | .    | .         | .         | .        | .           | .              | . |
| chr4 | 70071345  | 70071746  | .    | .         | .         | .        | .           | .              | . |
| chr4 | 74924025  | 74924426  | .    | .         | .         | .        | .           | .              | . |
| chr4 | 83063361  | 83063762  | .    | .         | .         | .        | .           | .              | . |
| chr4 | 86221287  | 86221688  | .    | .         | .         | .        | .           | .              | . |
| chr4 | 86257869  | 86258270  | .    | .         | .         | .        | .           | .              | . |
| chr4 | 86503106  | 86503507  | .    | .         | .         | .        | .           | .              | . |
| chr4 | 88368132  | 88368533  | chr4 | 88368439  | 88368485  | G-rich   | Low_comple  | Low_complexity |   |
| chr4 | 94269945  | 94270346  | .    | .         | .         | .        | .           | .              | . |
| chr4 | 94718902  | 94719303  | .    | .         | .         | .        | .           | .              | . |
| chr4 | 98460246  | 98460647  | chr4 | 98460166  | 98460279  | ID_B1    | SINE        | B4             |   |
| chr4 | 98460246  | 98460647  | chr4 | 98460353  | 98460487  | RLTR15   | LTR         | ERVK           |   |
| chr4 | 98460246  | 98460647  | chr4 | 98460472  | 98460728  | RLTR15   | LTR         | ERVK           |   |
| chr4 | 98860419  | 98860820  | chr4 | 98860812  | 98860835  | GC_rich  | Low_comple  | Low_complexity |   |
| chr4 | 99495658  | 99496059  | .    | .         | .         | .        | .           | .              | . |
| chr4 | 100448532 | 100448933 | chr4 | 100448511 | 100448609 | (GA)n    | Simple_repe | Simple_repeat  |   |
| chr4 | 100448532 | 100448933 | chr4 | 100448615 | 100448795 | MIRb     | SINE        | MIR            |   |
| chr4 | 106323358 | 106323759 | .    | .         | .         | .        | .           | .              | . |
| chr4 | 106351368 | 106351769 | .    | .         | .         | .        | .           | .              | . |
| chr4 | 106582676 | 106583077 | .    | .         | .         | .        | .           | .              | . |
| chr4 | 106739281 | 106739682 | .    | .         | .         | .        | .           | .              | . |
| chr4 | 106850784 | 106851185 | .    | .         | .         | .        | .           | .              | . |
| chr4 | 106986754 | 106987155 | .    | .         | .         | .        | .           | .              | . |
| chr4 | 107040192 | 107040593 | chr4 | 107040165 | 107040300 | B3       | SINE        | B2             |   |
| chr4 | 107476385 | 107476786 | chr4 | 107476444 | 107476472 | GC_rich  | Low_comple  | Low_complexity |   |
| chr4 | 107562651 | 107563052 | chr4 | 107562987 | 107563130 | ID_B1    | SINE        | B4             |   |
| chr4 | 108000448 | 108000849 | .    | .         | .         | .        | .           | .              | . |
| chr4 | 108132388 | 108132789 | chr4 | 108132578 | 108132611 | C-rich   | Low_comple  | Low_complexity |   |
| chr4 | 108132388 | 108132789 | chr4 | 108132679 | 108132733 | (CGG)n   | Simple_repe | Simple_repeat  |   |
| chr4 | 108251517 | 108251918 | .    | .         | .         | .        | .           | .              | . |
| chr4 | 108292586 | 108292987 | chr4 | 108292595 | 108292621 | GC_rich  | Low_comple  | Low_complexity |   |
| chr4 | 108506119 | 108506520 | chr4 | 108506189 | 108506214 | (CGG)n   | Simple_repe | Simple_repeat  |   |
| chr4 | 108520241 | 108520642 | .    | .         | .         | .        | .           | .              | . |
| chr4 | 108643647 | 108644048 | chr4 | 108643657 | 108643817 | MLT1B    | LTR         | MaLR           |   |
| chr4 | 108672853 | 108673254 | .    | .         | .         | .        | .           | .              | . |
| chr4 | 108789135 | 108789536 | .    | .         | .         | .        | .           | .              | . |
| chr4 | 108952531 | 108952932 | chr4 | 108952853 | 108952878 | (CGGG)n  | Simple_repe | Simple_repeat  |   |
| chr4 | 109348829 | 109349230 | chr4 | 109349196 | 109349253 | (CGG)n   | Simple_repe | Simple_repeat  |   |
| chr4 | 114078294 | 114078695 | chr4 | 114078469 | 114078525 | GA-rich  | Low_comple  | Low_complexity |   |
| chr4 | 114078294 | 114078695 | chr4 | 114078587 | 114078637 | (CCAG)n  | Simple_repe | Simple_repeat  |   |
| chr4 | 114078294 | 114078695 | chr4 | 114078655 | 114078700 | (CCCCG)n | Simple_repe | Simple_repeat  |   |
| chr4 | 114659247 | 114659648 | .    | .         | .         | .        | .           | .              | . |
| chr4 | 114672452 | 114672853 | .    | .         | .         | .        | .           | .              | . |
| chr4 | 115410096 | 115410497 | .    | .         | .         | .        | .           | .              | . |
| chr4 | 115457204 | 115457605 | .    | .         | .         | .        | .           | .              | . |
| chr4 | 115725913 | 115726314 | chr4 | 115725944 | 115726053 | GA-rich  | Low_comple  | Low_complexity |   |
| chr4 | 115747544 | 115747945 | .    | .         | .         | .        | .           | .              | . |
| chr4 | 115796143 | 115796544 | .    | .         | .         | .        | .           | .              | . |
| chr4 | 116137557 | 116137958 | chr4 | 116137859 | 116138124 | L2       | LINE        | L2             |   |
| chr4 | 116180245 | 116180646 | .    | .         | .         | .        | .           | .              | . |
| chr4 | 116229491 | 116229892 | .    | .         | .         | .        | .           | .              | . |
| chr4 | 116270120 | 116270521 | .    | .         | .         | .        | .           | .              | . |
| chr4 | 116300368 | 116300769 | .    | .         | .         | .        | .           | .              | . |
| chr4 | 116324106 | 116324507 | .    | .         | .         | .        | .           | .              | . |
| chr4 | 116358243 | 116358644 | .    | .         | .         | .        | .           | .              | . |
| chr4 | 116380820 | 116381221 | .    | .         | .         | .        | .           | .              | . |
| chr4 | 116479757 | 116480158 | .    | .         | .         | .        | .           | .              | . |
| chr4 | 116691794 | 116692195 | .    | .         | .         | .        | .           | .              | . |
| chr4 | 116798587 | 116798988 | .    | .         | .         | .        | .           | .              | . |
| chr4 | 116828458 | 116828859 | .    | .         | .         | .        | .           | .              | . |
| chr4 | 116855037 | 116855438 | chr4 | 116855331 | 116855357 | (TTGG)n  | Simple_repe | Simple_repeat  |   |
| chr4 | 116855037 | 116855438 | chr4 | 116855371 | 116855503 | B1_Mus2  | SINE        | Alu            |   |
| chr4 | 117222606 | 117223007 | chr4 | 117222669 | 117222702 | AT_rich  | Low_comple  | Low_complexity |   |
| chr4 | 117354723 | 117355124 | chr4 | 117355080 | 117355224 | MIRb     | SINE        | MIR            |   |
| chr4 | 117559831 | 117560232 | .    | .         | .         | .        | .           | .              | . |
| chr4 | 117564494 | 117564895 | chr4 | 117564884 | 117564945 | RSINE1   | SINE        | B4             |   |
| chr4 | 117587665 | 117588066 | .    | .         | .         | .        | .           | .              | . |
| chr4 | 118081692 | 118082093 | .    | .         | .         | .        | .           | .              | . |
| chr4 | 118101307 | 118101708 | .    | .         | .         | .        | .           | .              | . |
| chr4 | 118293263 | 118293664 | .    | .         | .         | .        | .           | .              | . |
| chr4 | 118846753 | 118847154 | .    | .         | .         | .        | .           | .              | . |
| chr4 | 118967240 | 118967641 | .    | .         | .         | .        | .           | .              | . |
| chr4 | 118992985 | 118993386 | .    | .         | .         | .        | .           | .              | . |
| chr4 | 119211971 | 119212372 | chr4 | 119212300 | 119212326 | (CCG)n   | Simple_repe | Simple_repeat  |   |
| chr4 | 120243712 | 120244113 | chr4 | 120244038 | 120244468 | L2c      | LINE        | L2             |   |
| chr4 | 120597449 | 120597850 | .    | .         | .         | .        | .           | .              | . |
| chr4 | 120770631 | 120771032 | .    | .         | .         | .        | .           | .              | . |



|      |           |           |      |           |           |                  |             |                |
|------|-----------|-----------|------|-----------|-----------|------------------|-------------|----------------|
| chr5 | 22938523  | 22938924  | .    | .         | .         | .                | .           | .              |
| chr5 | 23900269  | 23900670  | .    | .         | .         | .                | .           | .              |
| chr5 | 23929294  | 23929695  | .    | .         | .         | .                | .           | .              |
| chr5 | 23950812  | 23951213  | .    | .         | .         | .                | .           | .              |
| chr5 | 23953488  | 23953889  | .    | .         | .         | .                | .           | .              |
| chr5 | 24083153  | 24083554  | .    | .         | .         | .                | .           | .              |
| chr5 | 24092952  | 24093353  | .    | .         | .         | .                | .           | .              |
| chr5 | 24191557  | 24191958  | chr5 | 24191732  | 24191760  | GC_rich          | Low_comple  | Low_complexity |
| chr5 | 24191557  | 24191958  | chr5 | 24191890  | 24191994  | G-rich           | Low_comple  | Low_complexity |
| chr5 | 28118018  | 28118419  | .    | .         | .         | .                | .           | .              |
| chr5 | 28643487  | 28643888  | chr5 | 28643802  | 28643845  | GC_rich          | Low_comple  | Low_complexity |
| chr5 | 29761016  | 29761417  | .    | .         | .         | .                | .           | .              |
| chr5 | 29895492  | 29895893  | .    | .         | .         | .                | .           | .              |
| chr5 | 30062126  | 30062527  | .    | .         | .         | .                | .           | .              |
| chr5 | 30339686  | 30340087  | .    | .         | .         | .                | .           | .              |
| chr5 | 30558753  | 30559154  | .    | .         | .         | .                | .           | .              |
| chr5 | 31171740  | 31172141  | .    | .         | .         | .                | .           | .              |
| chr5 | 31190806  | 31191207  | chr5 | 31190887  | 31190961  | tRNA-Ala-GC tRNA |             | tRNA           |
| chr5 | 31251932  | 31252333  | .    | .         | .         | .                | .           | .              |
| chr5 | 31351550  | 31351951  | .    | .         | .         | .                | .           | .              |
| chr5 | 31482271  | 31482672  | .    | .         | .         | .                | .           | .              |
| chr5 | 31495339  | 31495740  | .    | .         | .         | .                | .           | .              |
| chr5 | 31504526  | 31504927  | .    | .         | .         | .                | .           | .              |
| chr5 | 31593295  | 31593696  | chr5 | 31593279  | 31593301  | (T)n             | Simple_repe | Simple_repeat  |
| chr5 | 31829025  | 31829426  | .    | .         | .         | .                | .           | .              |
| chr5 | 31916149  | 31916550  | chr5 | 31916117  | 31916155  | MIRB             | SINE        | MIR            |
| chr5 | 33677801  | 33678202  | .    | .         | .         | .                | .           | .              |
| chr5 | 33994956  | 33995357  | .    | .         | .         | .                | .           | .              |
| chr5 | 34000462  | 34000863  | .    | .         | .         | .                | .           | .              |
| chr5 | 34125299  | 34125700  | .    | .         | .         | .                | .           | .              |
| chr5 | 34278902  | 34279303  | .    | .         | .         | .                | .           | .              |
| chr5 | 34511898  | 34512299  | .    | .         | .         | .                | .           | .              |
| chr5 | 34678728  | 34679129  | .    | .         | .         | .                | .           | .              |
| chr5 | 34712170  | 34712571  | chr5 | 34712483  | 34712534  | GC_rich          | Low_comple  | Low_complexity |
| chr5 | 35002704  | 35003105  | .    | .         | .         | .                | .           | .              |
| chr5 | 35104204  | 35104605  | .    | .         | .         | .                | .           | .              |
| chr5 | 35917536  | 35917937  | .    | .         | .         | .                | .           | .              |
| chr5 | 35925322  | 35925723  | chr5 | 35925650  | 35925678  | (CGGGG)n         | Simple_repe | Simple_repeat  |
| chr5 | 36807464  | 36807865  | .    | .         | .         | .                | .           | .              |
| chr5 | 37141614  | 37142015  | chr5 | 37141644  | 37141673  | AT_rich          | Low_comple  | Low_complexity |
| chr5 | 37141614  | 37142015  | chr5 | 37141728  | 37141832  | B2_Mm2           | SINE        | B2             |
| chr5 | 37141614  | 37142015  | chr5 | 37141832  | 37141856  | (T)n             | Simple_repe | Simple_repeat  |
| chr5 | 37222487  | 37222888  | chr5 | 37222625  | 37222729  | MLT1J1           | LTR         | MaLR           |
| chr5 | 37222487  | 37222888  | chr5 | 37222719  | 37222812  | B3               | SINE        | B2             |
| chr5 | 37222487  | 37222888  | chr5 | 37222815  | 37223230  | RCHARR1          | DNA         | MER1_type      |
| chr5 | 38430268  | 38430669  | .    | .         | .         | .                | .           | .              |
| chr5 | 42235361  | 42235762  | chr5 | 42235324  | 42235395  | (CGG)n           | Simple_repe | Simple_repeat  |
| chr5 | 45911271  | 45911672  | chr5 | 45911609  | 45911631  | GC_rich          | Low_comple  | Low_complexity |
| chr5 | 46248988  | 46249389  | .    | .         | .         | .                | .           | .              |
| chr5 | 53060784  | 53061185  | .    | .         | .         | .                | .           | .              |
| chr5 | 53174076  | 53174477  | chr5 | 53174145  | 53174186  | (TGGG)n          | Simple_repe | Simple_repeat  |
| chr5 | 54200723  | 54201124  | .    | .         | .         | .                | .           | .              |
| chr5 | 65782500  | 65782901  | .    | .         | .         | .                | .           | .              |
| chr5 | 65884014  | 65884415  | .    | .         | .         | .                | .           | .              |
| chr5 | 67651661  | 67652062  | .    | .         | .         | .                | .           | .              |
| chr5 | 69947936  | 69948337  | chr5 | 69947924  | 69947970  | (CA)n            | Simple_repe | Simple_repeat  |
| chr5 | 72950805  | 72951206  | chr5 | 72950830  | 72950851  | GC_rich          | Low_comple  | Low_complexity |
| chr5 | 72950805  | 72951206  | chr5 | 72950976  | 72950998  | (T)n             | Simple_repe | Simple_repeat  |
| chr5 | 73683847  | 73684248  | .    | .         | .         | .                | .           | .              |
| chr5 | 73883581  | 73883982  | .    | .         | .         | .                | .           | .              |
| chr5 | 76958129  | 76958530  | chr5 | 76957971  | 76958177  | URR1A            | DNA         | MER1_type      |
| chr5 | 77380597  | 77380998  | .    | .         | .         | .                | .           | .              |
| chr5 | 77403428  | 77403829  | .    | .         | .         | .                | .           | .              |
| chr5 | 77739327  | 77739728  | .    | .         | .         | .                | .           | .              |
| chr5 | 87233056  | 87233457  | chr5 | 87233153  | 87233189  | (CCCCCG)n        | Simple_repe | Simple_repeat  |
| chr5 | 88983260  | 88983661  | .    | .         | .         | .                | .           | .              |
| chr5 | 91711833  | 91712234  | .    | .         | .         | .                | .           | .              |
| chr5 | 92863994  | 92864395  | .    | .         | .         | .                | .           | .              |
| chr5 | 96591726  | 96592127  | .    | .         | .         | .                | .           | .              |
| chr5 | 96638901  | 96639302  | .    | .         | .         | .                | .           | .              |
| chr5 | 100947103 | 100947504 | .    | .         | .         | .                | .           | .              |
| chr5 | 101227459 | 101227860 | .    | .         | .         | .                | .           | .              |
| chr5 | 101249785 | 101250186 | .    | .         | .         | .                | .           | .              |
| chr5 | 104340133 | 104340534 | chr5 | 104340140 | 104340203 | GC_rich          | Low_comple  | Low_complexity |
| chr5 | 104340133 | 104340534 | chr5 | 104340281 | 104340308 | (CGGGG)n         | Simple_repe | Simple_repeat  |
| chr5 | 108494888 | 108494889 | .    | .         | .         | .                | .           | .              |
| chr5 | 108561513 | 108561914 | .    | .         | .         | .                | .           | .              |
| chr5 | 108697745 | 108698146 | .    | .         | .         | .                | .           | .              |
| chr5 | 108741608 | 108742009 | .    | .         | .         | .                | .           | .              |
| chr5 | 108863222 | 108863623 | .    | .         | .         | .                | .           | .              |
| chr5 | 110538896 | 110539297 | .    | .         | .         | .                | .           | .              |
| chr5 | 111268706 | 111269107 | .    | .         | .         | .                | .           | .              |
| chr5 | 112755141 | 112755542 | .    | .         | .         | .                | .           | .              |
| chr5 | 112770612 | 112771013 | .    | .         | .         | .                | .           | .              |
| chr5 | 115016924 | 115017325 | .    | .         | .         | .                | .           | .              |
| chr5 | 115372300 | 115372701 | chr5 | 115372386 | 115372463 | B1_Mur4          | SINE        | Alu            |
| chr5 | 115372300 | 115372701 | chr5 | 115372463 | 115372611 | GSAT_MM          | Satellite   | Satellite      |
| chr5 | 115372300 | 115372701 | chr5 | 115372624 | 115372737 | RSINE1           | SINE        | B4             |
| chr5 | 115391949 | 115392350 | chr5 | 115391980 | 115392028 | GA-rich          | Low_comple  | Low_complexity |
| chr5 | 115722753 | 115723154 | chr5 | 115723083 | 115723189 | B1_Mur1          | SINE        | Alu            |
| chr5 | 115729456 | 115729857 | .    | .         | .         | .                | .           | .              |
| chr5 | 115750913 | 115751314 | chr5 | 115750980 | 115751019 | GC_rich          | Low_comple  | Low_complexity |
| chr5 | 115776930 | 115777331 | chr5 | 115777208 | 115777361 | (CGG)n           | Simple_repe | Simple_repeat  |
| chr5 | 115791072 | 115791473 | .    | .         | .         | .                | .           | .              |
| chr5 | 115934240 | 115934641 | chr5 | 115934600 | 115934707 | PB1D9            | SINE        | Alu            |

|      |           |           |      |           |           |           |                           |
|------|-----------|-----------|------|-----------|-----------|-----------|---------------------------|
| chr5 | 116015029 | 116015430 | chr5 | 116015323 | 116015476 | (CGG)n    | Simple_repe:Simple_repeat |
| chr5 | 116870959 | 116871360 | chr5 | 116871234 | 116871374 | L1MC3     | LINE L1                   |
| chr5 | 117565854 | 117566255 | .    | .         | .         | .         | .                         |
| chr5 | 117806567 | 117806968 | .    | .         | .         | .         | .                         |
| chr5 | 121654265 | 121654666 | chr5 | 121654267 | 121654383 | RSINE1    | SINE B4                   |
| chr5 | 121902604 | 121903005 | .    | .         | .         | .         | .                         |
| chr5 | 121995682 | 121996083 | chr5 | 121995596 | 121995715 | (CCG)n    | Simple_repe:Simple_repeat |
| chr5 | 121995682 | 121996083 | chr5 | 121995743 | 121995777 | GC_rich   | Low_comple:Low_complexity |
| chr5 | 122044120 | 122044521 | .    | .         | .         | .         | .                         |
| chr5 | 122298149 | 122298550 | .    | .         | .         | .         | .                         |
| chr5 | 122714224 | 122714625 | chr5 | 122714526 | 122714603 | (CGGGG)n  | Simple_repe:Simple_repeat |
| chr5 | 122734037 | 122734438 | chr5 | 122733898 | 122734039 | ID_B1     | SINE B4                   |
| chr5 | 122734037 | 122734438 | chr5 | 122734305 | 122734444 | G-rich    | Low_comple:Low_complexity |
| chr5 | 122822278 | 122822679 | .    | .         | .         | .         | .                         |
| chr5 | 123271253 | 123271654 | .    | .         | .         | .         | .                         |
| chr5 | 123677976 | 123678377 | chr5 | 123677852 | 123677985 | B1_Mus2   | SINE Alu                  |
| chr5 | 124170910 | 124171311 | .    | .         | .         | .         | .                         |
| chr5 | 124199256 | 124199657 | .    | .         | .         | .         | .                         |
| chr5 | 124356964 | 124357365 | .    | .         | .         | .         | .                         |
| chr5 | 124777302 | 124777703 | .    | .         | .         | .         | .                         |
| chr5 | 124875905 | 124876306 | chr5 | 124876044 | 124876072 | (CACCC)n  | Simple_repe:Simple_repeat |
| chr5 | 124875905 | 124876306 | chr5 | 124876294 | 124876441 | B1_Mus1   | SINE Alu                  |
| chr5 | 124889365 | 124889766 | .    | .         | .         | .         | .                         |
| chr5 | 124990351 | 124990752 | chr5 | 124990369 | 124990547 | B3        | SINE B2                   |
| chr5 | 125342378 | 125342779 | .    | .         | .         | .         | .                         |
| chr5 | 128097718 | 128098119 | .    | .         | .         | .         | .                         |
| chr5 | 129525346 | 129525747 | .    | .         | .         | .         | .                         |
| chr5 | 130175781 | 130176182 | .    | .         | .         | .         | .                         |
| chr5 | 130230679 | 130231080 | chr5 | 130230612 | 130230693 | URR1B     | DNA MER1_type             |
| chr5 | 130363210 | 130363611 | chr5 | 130363459 | 130363526 | PB1D10    | SINE Alu                  |
| chr5 | 130504960 | 130505361 | chr5 | 130504886 | 130505016 | B1F       | SINE Alu                  |
| chr5 | 130697982 | 130698383 | chr5 | 130698350 | 130698385 | GC_rich   | Low_comple:Low_complexity |
| chr5 | 134575334 | 134575735 | .    | .         | .         | .         | .                         |
| chr5 | 134652462 | 134652863 | .    | .         | .         | .         | .                         |
| chr5 | 134790535 | 134790936 | chr5 | 134790590 | 134790644 | (T)n      | Simple_repe:Simple_repeat |
| chr5 | 135662675 | 135663076 | .    | .         | .         | .         | .                         |
| chr5 | 135870252 | 135870653 | chr5 | 135870419 | 135870440 | GC_rich   | Low_comple:Low_complexity |
| chr5 | 135870252 | 135870653 | chr5 | 135870490 | 135870551 | ID_B1     | SINE B4                   |
| chr5 | 135870252 | 135870653 | chr5 | 135870551 | 135870682 | B1_Mur4   | SINE Alu                  |
| chr5 | 136108256 | 136108657 | chr5 | 136108283 | 136108318 | (TTTG)n   | Simple_repe:Simple_repeat |
| chr5 | 136410680 | 136411081 | chr5 | 136410756 | 136410782 | (T)n      | Simple_repe:Simple_repeat |
| chr5 | 136470459 | 136470860 | chr5 | 136470339 | 136470501 | RSINE1    | SINE B4                   |
| chr5 | 136470459 | 136470860 | chr5 | 136470341 | 136470535 | B2_Mm2    | SINE B2                   |
| chr5 | 136592345 | 136592746 | .    | .         | .         | .         | .                         |
| chr5 | 136611800 | 136612201 | .    | .         | .         | .         | .                         |
| chr5 | 137394779 | 137395180 | .    | .         | .         | .         | .                         |
| chr5 | 137428945 | 137429346 | .    | .         | .         | .         | .                         |
| chr5 | 137438023 | 137438424 | .    | .         | .         | .         | .                         |
| chr5 | 137462580 | 137462981 | .    | .         | .         | .         | .                         |
| chr5 | 137521292 | 137521693 | .    | .         | .         | .         | .                         |
| chr5 | 137547127 | 137547528 | chr5 | 137547411 | 137547490 | PB1D10    | SINE Alu                  |
| chr5 | 137727853 | 137728254 | chr5 | 137728190 | 137728214 | GC_rich   | Low_comple:Low_complexity |
| chr5 | 137748824 | 137749225 | .    | .         | .         | .         | .                         |
| chr5 | 137790910 | 137791311 | .    | .         | .         | .         | .                         |
| chr5 | 137928835 | 137929236 | chr5 | 137928843 | 137928900 | L2a       | LINE L2                   |
| chr5 | 137928835 | 137929236 | chr5 | 137928928 | 137929123 | B3        | SINE B2                   |
| chr5 | 137928835 | 137929236 | chr5 | 137929155 | 137929206 | (CATATA)n | Simple_repe:Simple_repeat |
| chr5 | 137928835 | 137929236 | chr5 | 137929220 | 137929314 | B4A       | SINE B4                   |
| chr5 | 137974241 | 137974642 | .    | .         | .         | .         | .                         |
| chr5 | 138042184 | 138042585 | chr5 | 138042568 | 138042590 | AT_rich   | Low_comple:Low_complexity |
| chr5 | 138179684 | 138180085 | chr5 | 138179893 | 138179953 | (TC)n     | Simple_repe:Simple_repeat |
| chr5 | 138228719 | 138229120 | .    | .         | .         | .         | .                         |
| chr5 | 138526059 | 138526460 | .    | .         | .         | .         | .                         |
| chr5 | 138558154 | 138558555 | .    | .         | .         | .         | .                         |
| chr5 | 138596808 | 138597209 | .    | .         | .         | .         | .                         |
| chr5 | 138602112 | 138602513 | chr5 | 138602094 | 138602185 | ID_B1     | SINE B4                   |
| chr5 | 138602112 | 138602513 | chr5 | 138602314 | 138602391 | (CGG)n    | Simple_repe:Simple_repeat |
| chr5 | 138612174 | 138612575 | .    | .         | .         | .         | .                         |
| chr5 | 138628943 | 138629344 | .    | .         | .         | .         | .                         |
| chr5 | 139820941 | 139821342 | .    | .         | .         | .         | .                         |
| chr5 | 140251495 | 140251896 | chr5 | 140251860 | 140251976 | B1_Mus1   | SINE Alu                  |
| chr5 | 140302681 | 140303082 | chr5 | 140303024 | 140303065 | AT_rich   | Low_comple:Low_complexity |
| chr5 | 140797486 | 140797887 | chr5 | 140797746 | 140797855 | PB1D9     | SINE Alu                  |
| chr5 | 140895070 | 140895471 | .    | .         | .         | .         | .                         |
| chr5 | 143656744 | 143657145 | chr5 | 143657047 | 143657111 | L2        | LINE L2                   |
| chr5 | 143874649 | 143875050 | chr5 | 143875047 | 143875246 | B3        | SINE B2                   |
| chr5 | 143942363 | 143942764 | .    | .         | .         | .         | .                         |
| chr5 | 144165265 | 144165666 | .    | .         | .         | .         | .                         |
| chr5 | 144225191 | 144225592 | .    | .         | .         | .         | .                         |
| chr5 | 144670604 | 144671005 | .    | .         | .         | .         | .                         |
| chr5 | 144775603 | 144776004 | chr5 | 144775655 | 144775697 | GC_rich   | Low_comple:Low_complexity |
| chr5 | 144775603 | 144776004 | chr5 | 144775976 | 144775989 | PB1D9     | SINE Alu                  |
| chr5 | 144775603 | 144776004 | chr5 | 144775989 | 144776017 | (TTTG)n   | Simple_repe:Simple_repeat |
| chr5 | 145900745 | 145901146 | chr5 | 145900856 | 145900882 | (CGG)n    | Simple_repe:Simple_repeat |
| chr5 | 145927846 | 145928247 | chr5 | 145928103 | 145928133 | (CGG)n    | Simple_repe:Simple_repeat |
| chr5 | 145952238 | 145952639 | chr5 | 145952604 | 145952685 | BC1_Mm    | scRNA scRNA               |
| chr5 | 145964773 | 145965174 | chr5 | 145964822 | 145964892 | RSINE1    | SINE B4                   |
| chr5 | 147032446 | 147032847 | .    | .         | .         | .         | .                         |
| chr5 | 147042324 | 147042725 | .    | .         | .         | .         | .                         |
| chr5 | 148213853 | 148214254 | chr5 | 148213833 | 148213906 | B4        | SINE B4                   |
| chr5 | 148213853 | 148214254 | chr5 | 148213950 | 148214224 | RLTR15    | LTR ERVK                  |
| chr5 | 148241531 | 148241932 | chr5 | 148241928 | 148241968 | GC_rich   | Low_comple:Low_complexity |
| chr5 | 149210206 | 149210607 | .    | .         | .         | .         | .                         |
| chr5 | 149364277 | 149364678 | .    | .         | .         | .         | .                         |
| chr5 | 149740087 | 149740488 | .    | .         | .         | .         | .                         |





|      |           |           |      |           |           |          |             |                |   |
|------|-----------|-----------|------|-----------|-----------|----------|-------------|----------------|---|
| chr6 | 94450122  | 94450523  | .    | .         | .         | .        | .           | .              | . |
| chr6 | 95067509  | 95067910  | .    | .         | .         | .        | .           | .              | . |
| chr6 | 97155353  | 97155754  | chr6 | 97155676  | 97155697  | GC_rich  | Low_comple  | Low_complexity |   |
| chr6 | 97756750  | 97757151  | chr6 | 97757031  | 97757054  | GC_rich  | Low_comple  | Low_complexity |   |
| chr6 | 106749885 | 106750286 | .    | .         | .         | .        | .           | .              | . |
| chr6 | 108014816 | 108015217 | .    | .         | .         | .        | .           | .              | . |
| chr6 | 108162811 | 108163212 | chr6 | 108163142 | 108163204 | GA-rich  | Low_comple  | Low_complexity |   |
| chr6 | 112646506 | 112646907 | .    | .         | .         | .        | .           | .              | . |
| chr6 | 112995989 | 112996390 | .    | .         | .         | .        | .           | .              | . |
| chr6 | 113276636 | 113277037 | .    | .         | .         | .        | .           | .              | . |
| chr6 | 113588123 | 113588524 | .    | .         | .         | .        | .           | .              | . |
| chr6 | 113646658 | 113647059 | chr6 | 113646750 | 113646774 | AT_rich  | Low_comple  | Low_complexity |   |
| chr6 | 113690492 | 113690893 | .    | .         | .         | .        | .           | .              | . |
| chr6 | 115551524 | 115551925 | chr6 | 115551388 | 115551597 | B3       | SINE        | B2             |   |
| chr6 | 115551524 | 115551925 | chr6 | 115551613 | 115551650 | (CAT)n   | Simple_repe | Simple_repeat  |   |
| chr6 | 115551524 | 115551925 | chr6 | 115551904 | 115551949 | (CGGGG)n | Simple_repe | Simple_repeat  |   |
| chr6 | 115758628 | 115759029 | .    | .         | .         | .        | .           | .              | . |
| chr6 | 116157781 | 116158182 | .    | .         | .         | .        | .           | .              | . |
| chr6 | 117790991 | 117791392 | .    | .         | .         | .        | .           | .              | . |
| chr6 | 117812882 | 117813283 | .    | .         | .         | .        | .           | .              | . |
| chr6 | 117850684 | 117851085 | chr6 | 117851074 | 117851106 | (TG)n    | Simple_repe | Simple_repeat  |   |
| chr6 | 118369268 | 118369669 | .    | .         | .         | .        | .           | .              | . |
| chr6 | 118429438 | 118429839 | chr6 | 118429406 | 118429474 | (CCCC)n  | Simple_repe | Simple_repeat  |   |
| chr6 | 119988653 | 119989054 | chr6 | 119988715 | 119988748 | GC_rich  | Low_comple  | Low_complexity |   |
| chr6 | 119988653 | 119989054 | chr6 | 119989027 | 119989063 | GA-rich  | Low_comple  | Low_complexity |   |
| chr6 | 120307306 | 120307707 | .    | .         | .         | .        | .           | .              | . |
| chr6 | 120313886 | 120314287 | .    | .         | .         | .        | .           | .              | . |
| chr6 | 120481228 | 120481629 | .    | .         | .         | .        | .           | .              | . |
| chr6 | 121133651 | 121134052 | .    | .         | .         | .        | .           | .              | . |
| chr6 | 122258431 | 122258832 | .    | .         | .         | .        | .           | .              | . |
| chr6 | 124691137 | 124691538 | chr6 | 124691242 | 124691304 | U7       | snRNA       | snRNA          |   |
| chr6 | 124778875 | 124779276 | .    | .         | .         | .        | .           | .              | . |
| chr6 | 124958778 | 124959179 | .    | .         | .         | .        | .           | .              | . |
| chr6 | 124989614 | 124990015 | .    | .         | .         | .        | .           | .              | . |
| chr6 | 125094960 | 125095361 | .    | .         | .         | .        | .           | .              | . |
| chr6 | 125141963 | 125142364 | .    | .         | .         | .        | .           | .              | . |
| chr6 | 125181063 | 125181464 | chr6 | 125181096 | 125181127 | (A)n     | Simple_repe | Simple_repeat  |   |
| chr6 | 126798946 | 126799347 | .    | .         | .         | .        | .           | .              | . |
| chr6 | 128374703 | 128375104 | .    | .         | .         | .        | .           | .              | . |
| chr6 | 128387693 | 128388094 | .    | .         | .         | .        | .           | .              | . |
| chr6 | 133055475 | 133055876 | .    | .         | .         | .        | .           | .              | . |
| chr6 | 134590759 | 134591160 | chr6 | 134590576 | 134590779 | B2_Mm2   | SINE        | B2             |   |
| chr6 | 134779875 | 134780276 | .    | .         | .         | .        | .           | .              | . |
| chr6 | 134961415 | 134961816 | chr6 | 134961420 | 134961441 | AT_rich  | Low_comple  | Low_complexity |   |
| chr6 | 135147847 | 135148248 | .    | .         | .         | .        | .           | .              | . |
| chr6 | 135312489 | 135312890 | .    | .         | .         | .        | .           | .              | . |
| chr6 | 136753285 | 136753686 | chr6 | 136753565 | 136753576 | ID_B1    | SINE        | B4             |   |
| chr6 | 136753285 | 136753686 | chr6 | 136753576 | 136753661 | B1F      | SINE        | Alu            |   |
| chr6 | 137683406 | 137683807 | chr6 | 137683696 | 137683730 | (TCCC)n  | Simple_repe | Simple_repeat  |   |
| chr6 | 140569160 | 140569561 | chr6 | 140569356 | 140569699 | LTR88b   | LTR         | Gypsy?         |   |
| chr6 | 142293976 | 142294377 | .    | .         | .         | .        | .           | .              | . |
| chr6 | 142704973 | 142705374 | chr6 | 142704923 | 142705030 | GA-rich  | Low_comple  | Low_complexity |   |
| chr6 | 142704973 | 142705374 | chr6 | 142705323 | 142705367 | GC_rich  | Low_comple  | Low_complexity |   |
| chr6 | 143048514 | 143048915 | .    | .         | .         | .        | .           | .              | . |
| chr6 | 143115536 | 143115937 | .    | .         | .         | .        | .           | .              | . |
| chr6 | 148160602 | 148161003 | .    | .         | .         | .        | .           | .              | . |
| chr6 | 149137180 | 149137581 | .    | .         | .         | .        | .           | .              | . |
| chr7 | 3568731   | 3569132   | chr7 | 3568589   | 3568751   | B2_Mm2   | SINE        | B2             |   |
| chr7 | 3581041   | 3581442   | .    | .         | .         | .        | .           | .              | . |
| chr7 | 4397095   | 4397496   | chr7 | 4397415   | 4397451   | (GA)n    | Simple_repe | Simple_repeat  |   |
| chr7 | 4397095   | 4397496   | chr7 | 4397451   | 4397556   | (GGAA)n  | Simple_repe | Simple_repeat  |   |
| chr7 | 4453647   | 4454048   | chr7 | 4453647   | 4453766   | B1_Mus1  | SINE        | Alu            |   |
| chr7 | 4453647   | 4454048   | chr7 | 4453962   | 4453974   | PB1D10   | SINE        | Alu            |   |
| chr7 | 4453647   | 4454048   | chr7 | 4453974   | 4454058   | ID_B1    | SINE        | B4             |   |
| chr7 | 4610383   | 4610784   | .    | .         | .         | .        | .           | .              | . |
| chr7 | 4675091   | 4675492   | .    | .         | .         | .        | .           | .              | . |
| chr7 | 4744295   | 4744696   | .    | .         | .         | .        | .           | .              | . |
| chr7 | 4764232   | 4764633   | .    | .         | .         | .        | .           | .              | . |
| chr7 | 4966745   | 4967146   | chr7 | 4967100   | 4967129   | GC_rich  | Low_comple  | Low_complexity |   |
| chr7 | 5031635   | 5032036   | chr7 | 5031898   | 5031931   | GC_rich  | Low_comple  | Low_complexity |   |
| chr7 | 6123753   | 6124154   | .    | .         | .         | .        | .           | .              | . |
| chr7 | 6335679   | 6336080   | .    | .         | .         | .        | .           | .              | . |
| chr7 | 7074067   | 7074468   | chr7 | 7074446   | 7074569   | B1_Mur1  | SINE        | Alu            |   |
| chr7 | 7089314   | 7089715   | .    | .         | .         | .        | .           | .              | . |
| chr7 | 7123792   | 7124193   | .    | .         | .         | .        | .           | .              | . |
| chr7 | 7230801   | 7231202   | .    | .         | .         | .        | .           | .              | . |
| chr7 | 7252018   | 7252419   | chr7 | 7252024   | 7252064   | (TTG)n   | Simple_repe | Simple_repeat  |   |
| chr7 | 11080622  | 11081023  | .    | .         | .         | .        | .           | .              | . |
| chr7 | 13007908  | 13008309  | .    | .         | .         | .        | .           | .              | . |
| chr7 | 13063440  | 13063841  | .    | .         | .         | .        | .           | .              | . |
| chr7 | 13420109  | 13420510  | .    | .         | .         | .        | .           | .              | . |
| chr7 | 13466287  | 13466688  | .    | .         | .         | .        | .           | .              | . |
| chr7 | 13482870  | 13483271  | chr7 | 13482795  | 13482913  | B3       | SINE        | B2             |   |
| chr7 | 13507373  | 13507774  | .    | .         | .         | .        | .           | .              | . |
| chr7 | 13563183  | 13563584  | .    | .         | .         | .        | .           | .              | . |
| chr7 | 13619902  | 13620303  | .    | .         | .         | .        | .           | .              | . |
| chr7 | 13639588  | 13639989  | .    | .         | .         | .        | .           | .              | . |
| chr7 | 13863869  | 13864270  | chr7 | 13864249  | 13864276  | (CGAG)n  | Simple_repe | Simple_repeat  |   |
| chr7 | 16893851  | 16894252  | .    | .         | .         | .        | .           | .              | . |
| chr7 | 17037873  | 17038274  | .    | .         | .         | .        | .           | .              | . |
| chr7 | 17323465  | 17323866  | .    | .         | .         | .        | .           | .              | . |
| chr7 | 17612445  | 17612846  | chr7 | 17612371  | 17612470  | L2b      | LINE        | L2             |   |
| chr7 | 19588115  | 19588516  | .    | .         | .         | .        | .           | .              | . |
| chr7 | 19609407  | 19609808  | .    | .         | .         | .        | .           | .              | . |
| chr7 | 19704917  | 19705318  | .    | .         | .         | .        | .           | .              | . |

|      |          |               |          |                  |                           |      |   |
|------|----------|---------------|----------|------------------|---------------------------|------|---|
| chr7 | 19857018 | 19857419      | .        | .                | .                         | .    | . |
| chr7 | 19929918 | 19930319 chr7 | 19929852 | 19930014 L2b     | LINE                      | L2   | . |
| chr7 | 19929918 | 19930319 chr7 | 19930136 | 19930202 (TC)n   | Simple_repe:Simple_repeat | .    | . |
| chr7 | 19945715 | 19946116 chr7 | 19945994 | 19946123 B1_Mur1 | SINE                      | Alu  | . |
| chr7 | 19966988 | 19967389 chr7 | 19966912 | 19967020 B1_Mus1 | SINE                      | Alu  | . |
| chr7 | 19966988 | 19967389 chr7 | 19967020 | 19967045 B4      | SINE                      | B4   | . |
| chr7 | 20189657 | 20190058 chr7 | 20190039 | 20190142 B3      | SINE                      | B2   | . |
| chr7 | 20301167 | 20301568      | .        | .                | .                         | .    | . |
| chr7 | 20537876 | 20538277 chr7 | 20537845 | 20537956 ID_B1   | SINE                      | B4   | . |
| chr7 | 20537876 | 20538277 chr7 | 20538004 | 20538072 MIRm    | SINE                      | MIR  | . |
| chr7 | 20537876 | 20538277 chr7 | 20538234 | 20538522 RLTR19  | LTR                       | ERVK | . |
| chr7 | 24866686 | 24867087 chr7 | 24866957 | 24867037 (TG)n   | Simple_repe:Simple_repeat | .    | . |
| chr7 | 24897133 | 24897534      | .        | .                | .                         | .    | . |
| chr7 | 24918948 | 24919349      | .        | .                | .                         | .    | . |
| chr7 | 24959848 | 24960249 chr7 | 24959904 | 24959929 (A)n    | Simple_repe:Simple_repeat | .    | . |
| chr7 | 24992994 | 24993395      | .        | .                | .                         | .    | . |
| chr7 | 25022553 | 25022954 chr7 | 25022818 | 25023371 Lx2B    | LINE                      | L1   | . |
| chr7 | 25039517 | 25039918      | .        | .                | .                         | .    | . |
| chr7 | 25055171 | 25055572 chr7 | 25055036 | 25055183 B1_Mus1 | SINE                      | Alu  | . |
| chr7 | 25084188 | 25084589      | .        | .                | .                         | .    | . |
| chr7 | 25101529 | 25101930      | .        | .                | .                         | .    | . |
| chr7 | 25292308 | 25292709 chr7 | 25292333 | 25292377 (CTCG)n | Simple_repe:Simple_repeat | .    | . |
| chr7 | 25292308 | 25292709 chr7 | 25292693 | 25292720 (T)n    | Simple_repe:Simple_repeat | .    | . |
| chr7 | 25689176 | 25689577      | .        | .                | .                         | .    | . |
| chr7 | 25757594 | 25757995      | .        | .                | .                         | .    | . |
| chr7 | 26022983 | 26023384      | .        | .                | .                         | .    | . |
| chr7 | 26065406 | 26065807      | .        | .                | .                         | .    | . |
| chr7 | 26082847 | 26083248 chr7 | 26083109 | 26083260 B1_Mus1 | SINE                      | Alu  | . |
| chr7 | 26503867 | 26504268      | .        | .                | .                         | .    | . |
| chr7 | 27980592 | 27980993      | .        | .                | .                         | .    | . |
| chr7 | 28016877 | 28017278 chr7 | 28016805 | 28016922 MIRm    | SINE                      | MIR  | . |
| chr7 | 28139119 | 28139520 chr7 | 28139106 | 28139126 (TTTA)n | Simple_repe:Simple_repeat | .    | . |
| chr7 | 28259541 | 28259942      | .        | .                | .                         | .    | . |
| chr7 | 28338046 | 28338447      | .        | .                | .                         | .    | . |
| chr7 | 28438744 | 28439145      | .        | .                | .                         | .    | . |
| chr7 | 28459698 | 28460099      | .        | .                | .                         | .    | . |
| chr7 | 28474212 | 28474613 chr7 | 28474183 | 28474268 (GA)n   | Simple_repe:Simple_repeat | .    | . |
| chr7 | 28474212 | 28474613 chr7 | 28474577 | 28474613 (TG)n   | Simple_repe:Simple_repeat | .    | . |
| chr7 | 28516178 | 28516579      | .        | .                | .                         | .    | . |
| chr7 | 28623353 | 28623754      | .        | .                | .                         | .    | . |
| chr7 | 28645404 | 28645805      | .        | .                | .                         | .    | . |
| chr7 | 28714278 | 28714679      | .        | .                | .                         | .    | . |
| chr7 | 28764019 | 28764420      | .        | .                | .                         | .    | . |
| chr7 | 28834914 | 28835315      | .        | .                | .                         | .    | . |
| chr7 | 28964355 | 28964756      | .        | .                | .                         | .    | . |
| chr7 | 29096986 | 29097387      | .        | .                | .                         | .    | . |
| chr7 | 29177750 | 29178151      | .        | .                | .                         | .    | . |
| chr7 | 29551527 | 29551928      | .        | .                | .                         | .    | . |
| chr7 | 30022900 | 30023301 chr7 | 30022789 | 30022915 B1_Mur4 | SINE                      | Alu  | . |
| chr7 | 30022900 | 30023301 chr7 | 30022930 | 30022952 (TAAA)n | Simple_repe:Simple_repeat | .    | . |
| chr7 | 30033496 | 30033897      | .        | .                | .                         | .    | . |
| chr7 | 30088649 | 30089050 chr7 | 30088858 | 30088888 GC-rich | Low_comple:Low_complexity | .    | . |
| chr7 | 30553354 | 30553755      | .        | .                | .                         | .    | . |
| chr7 | 30600792 | 30601193      | .        | .                | .                         | .    | . |
| chr7 | 30638511 | 30638912 chr7 | 30638786 | 30639049 MT2A    | LTR                       | ERVL | . |
| chr7 | 30644760 | 30645161 chr7 | 30644798 | 30644914 GA-rich | Low_comple:Low_complexity | .    | . |
| chr7 | 30693311 | 30693712      | .        | .                | .                         | .    | . |
| chr7 | 30768532 | 30768933      | .        | .                | .                         | .    | . |
| chr7 | 30836211 | 30836612      | .        | .                | .                         | .    | . |
| chr7 | 30857746 | 30858147      | .        | .                | .                         | .    | . |
| chr7 | 30875386 | 30875787      | .        | .                | .                         | .    | . |
| chr7 | 30879599 | 30880000      | .        | .                | .                         | .    | . |
| chr7 | 30906664 | 30907065      | .        | .                | .                         | .    | . |
| chr7 | 30954678 | 30955079      | .        | .                | .                         | .    | . |
| chr7 | 30981153 | 30981554 chr7 | 30981235 | 30981287 (TG)n   | Simple_repe:Simple_repeat | .    | . |
| chr7 | 31336912 | 31337313      | .        | .                | .                         | .    | . |
| chr7 | 31344712 | 31345113      | .        | .                | .                         | .    | . |
| chr7 | 31348115 | 31348516      | .        | .                | .                         | .    | . |
| chr7 | 31373775 | 31374176 chr7 | 31373794 | 31373824 (GGGG)n | Simple_repe:Simple_repeat | .    | . |
| chr7 | 31514358 | 31514759      | .        | .                | .                         | .    | . |
| chr7 | 35174609 | 35175010 chr7 | 35174675 | 35174716 (CGG)n  | Simple_repe:Simple_repeat | .    | . |
| chr7 | 36432370 | 36432771      | .        | .                | .                         | .    | . |
| chr7 | 48649007 | 48649408      | .        | .                | .                         | .    | . |
| chr7 | 48755068 | 48755469      | .        | .                | .                         | .    | . |
| chr7 | 49948010 | 49948411      | .        | .                | .                         | .    | . |
| chr7 | 50834874 | 50835275      | .        | .                | .                         | .    | . |
| chr7 | 50927137 | 50927538      | .        | .                | .                         | .    | . |
| chr7 | 51052148 | 51052549      | .        | .                | .                         | .    | . |
| chr7 | 51629153 | 51629554      | .        | .                | .                         | .    | . |
| chr7 | 51639789 | 51640190      | .        | .                | .                         | .    | . |
| chr7 | 51723127 | 51723528      | .        | .                | .                         | .    | . |
| chr7 | 51803943 | 51804344      | .        | .                | .                         | .    | . |
| chr7 | 52003647 | 52004048      | .        | .                | .                         | .    | . |
| chr7 | 52071530 | 52071931 chr7 | 52071792 | 52071937 (CGG)n  | Simple_repe:Simple_repeat | .    | . |
| chr7 | 52104114 | 52104515      | .        | .                | .                         | .    | . |
| chr7 | 52125286 | 52125687      | .        | .                | .                         | .    | . |
| chr7 | 52241835 | 52242236      | .        | .                | .                         | .    | . |
| chr7 | 52252480 | 52252881      | .        | .                | .                         | .    | . |
| chr7 | 52271452 | 52271853 chr7 | 52271477 | 52271508 (CGGG)n | Simple_repe:Simple_repeat | .    | . |
| chr7 | 52308620 | 52309021 chr7 | 52308694 | 52308731 G-rich  | Low_comple:Low_complexity | .    | . |
| chr7 | 52317863 | 52318264 chr7 | 52318263 | 52318406 B1_Mur2 | SINE                      | Alu  | . |
| chr7 | 52347513 | 52347914 chr7 | 52347847 | 52347932 PB1D9   | SINE                      | Alu  | . |
| chr7 | 52378500 | 52378901      | .        | .                | .                         | .    | . |
| chr7 | 52409496 | 52409897      | .        | .                | .                         | .    | . |
| chr7 | 52417293 | 52417694      | .        | .                | .                         | .    | . |

|      |           |           |      |           |           |             |                           |           |
|------|-----------|-----------|------|-----------|-----------|-------------|---------------------------|-----------|
| chr7 | 52650567  | 52650968  | chr7 | 52650593  | 52650614  | (A)n        | Simple_repe:Simple_repeat |           |
| chr7 | 52721733  | 52722134  |      |           |           |             |                           |           |
| chr7 | 52765828  | 52766229  | chr7 | 52766113  | 52766201  | B1F2        | SINE                      | Alu       |
| chr7 | 52876692  | 52877093  | chr7 | 52876648  | 52876778  | B1F1        | SINE                      | Alu       |
| chr7 | 52876692  | 52877093  | chr7 | 52876671  | 52876791  | MT2B        | LTR                       | ERV1      |
| chr7 | 52878886  | 52879287  | chr7 | 52879024  | 52879041  | MT2B2       | LTR                       | ERV1      |
| chr7 | 52878886  | 52879287  | chr7 | 52879041  | 52879159  | PB1         | SINE                      | Alu       |
| chr7 | 52878886  | 52879287  | chr7 | 52879175  | 52879300  | B1_Mur1     | SINE                      | Alu       |
| chr7 | 52894123  | 52894524  |      |           |           |             |                           |           |
| chr7 | 52935278  | 52935679  | chr7 | 52935224  | 52935467  | Tigger7     | DNA                       | MER2_type |
| chr7 | 52935278  | 52935679  | chr7 | 52935494  | 52935617  | RSINE1      | SINE                      | B4        |
| chr7 | 52935278  | 52935679  | chr7 | 52935623  | 52935753  | Tigger7     | DNA                       | MER2_type |
| chr7 | 52956121  | 52956522  |      |           |           |             |                           |           |
| chr7 | 52973190  | 52973591  |      |           |           |             |                           |           |
| chr7 | 53086175  | 53086576  |      |           |           |             |                           |           |
| chr7 | 53175943  | 53176344  |      |           |           |             |                           |           |
| chr7 | 54263507  | 54263908  | chr7 | 54263713  | 54263745  | (CA)n       | Simple_repe:Simple_repeat |           |
| chr7 | 57033530  | 57033931  | chr7 | 57033890  | 57033921  | GC_rich     | Low_comple:Low_complexity |           |
| chr7 | 59271768  | 59272169  | chr7 | 59271696  | 59271798  | ORR1C1      | LTR                       | MaLR      |
| chr7 | 59271768  | 59272169  | chr7 | 59271814  | 59272218  | MTC         | LTR                       | MaLR      |
| chr7 | 66483918  | 66484319  |      |           |           |             |                           |           |
| chr7 | 69564888  | 69565289  |      |           |           |             |                           |           |
| chr7 | 71432137  | 71432538  |      |           |           |             |                           |           |
| chr7 | 71536946  | 71537347  |      |           |           |             |                           |           |
| chr7 | 73205215  | 73205616  |      |           |           |             |                           |           |
| chr7 | 85927762  | 85928163  |      |           |           |             |                           |           |
| chr7 | 86040691  | 86041092  |      |           |           |             |                           |           |
| chr7 | 86610982  | 86611383  | chr7 | 86611304  | 86611377  | tRNA-Arg-CG | tRNA                      | tRNA      |
| chr7 | 87065370  | 87065771  |      |           |           |             |                           |           |
| chr7 | 87390899  | 87391300  |      |           |           |             |                           |           |
| chr7 | 87405850  | 87406251  | chr7 | 87405777  | 87405854  | PB1         | SINE                      | Alu       |
| chr7 | 87405850  | 87406251  | chr7 | 87405891  | 87405968  | ID4         | SINE                      | ID        |
| chr7 | 88005497  | 88005898  | chr7 | 88005865  | 88005891  | (CCGGG)n    | Simple_repe:Simple_repeat |           |
| chr7 | 88907632  | 88908033  |      |           |           |             |                           |           |
| chr7 | 88933843  | 88934244  |      |           |           |             |                           |           |
| chr7 | 89796891  | 89797292  |      |           |           |             |                           |           |
| chr7 | 91236799  | 91237200  |      |           |           |             |                           |           |
| chr7 | 97089599  | 97090000  |      |           |           |             |                           |           |
| chr7 | 99709750  | 99710151  |      |           |           |             |                           |           |
| chr7 | 99889836  | 99890237  |      |           |           |             |                           |           |
| chr7 | 104480541 | 104480942 |      |           |           |             |                           |           |
| chr7 | 104548410 | 104548811 | chr7 | 104548435 | 104548464 | (CA)n       | Simple_repe:Simple_repeat |           |
| chr7 | 104629287 | 104629688 |      |           |           |             |                           |           |
| chr7 | 104844940 | 104845341 |      |           |           |             |                           |           |
| chr7 | 105268984 | 105269385 |      |           |           |             |                           |           |
| chr7 | 105294963 | 105295364 | chr7 | 105295062 | 105295202 | PB1D7       | SINE                      | Alu       |
| chr7 | 105294963 | 105295364 | chr7 | 105295110 | 105295281 | ID_B1       | SINE                      | B4        |
| chr7 | 105294963 | 105295364 | chr7 | 105295291 | 105295388 | PB1D10      | SINE                      | Alu       |
| chr7 | 105804987 | 105805388 |      |           |           |             |                           |           |
| chr7 | 105851375 | 105851776 |      |           |           |             |                           |           |
| chr7 | 106632029 | 106632430 | chr7 | 106632375 | 106632494 | ID_B1       | SINE                      | B4        |
| chr7 | 107007305 | 107007706 | chr7 | 107007286 | 107007385 | (CCG)n      | Simple_repe:Simple_repeat |           |
| chr7 | 107269838 | 107270239 |      |           |           |             |                           |           |
| chr7 | 107375576 | 107375977 | chr7 | 107375503 | 107375600 | MIRc        | SINE                      | MIR       |
| chr7 | 107520465 | 107520866 |      |           |           |             |                           |           |
| chr7 | 107663104 | 107663505 |      |           |           |             |                           |           |
| chr7 | 107731170 | 107731571 |      |           |           |             |                           |           |
| chr7 | 107854673 | 107855074 |      |           |           |             |                           |           |
| chr7 | 108811940 | 108812341 |      |           |           |             |                           |           |
| chr7 | 109044724 | 109045125 |      |           |           |             |                           |           |
| chr7 | 109082230 | 109082631 |      |           |           |             |                           |           |
| chr7 | 109213802 | 109214203 | chr7 | 109214066 | 109214094 | AT_rich     | Low_comple:Low_complexity |           |
| chr7 | 109627831 | 109628232 |      |           |           |             |                           |           |
| chr7 | 112788809 | 112789210 |      |           |           |             |                           |           |
| chr7 | 112884804 | 112885205 | chr7 | 112885147 | 112885193 | (CCGGG)n    | Simple_repe:Simple_repeat |           |
| chr7 | 112959644 | 112960045 |      |           |           |             |                           |           |
| chr7 | 117129789 | 117130190 |      |           |           |             |                           |           |
| chr7 | 117161534 | 117161935 | chr7 | 117161516 | 117161539 | (CAAAA)n    | Simple_repe:Simple_repeat |           |
| chr7 | 117205030 | 117205431 |      |           |           |             |                           |           |
| chr7 | 118172248 | 118172649 |      |           |           |             |                           |           |
| chr7 | 118266140 | 118266541 |      |           |           |             |                           |           |
| chr7 | 123236542 | 123236943 |      |           |           |             |                           |           |
| chr7 | 123477546 | 123477947 |      |           |           |             |                           |           |
| chr7 | 125259489 | 125259890 |      |           |           |             |                           |           |
| chr7 | 125387004 | 125387405 |      |           |           |             |                           |           |
| chr7 | 125855781 | 125856182 | chr7 | 125855777 | 125855820 | (CAGA)n     | Simple_repe:Simple_repeat |           |
| chr7 | 125855781 | 125856182 | chr7 | 125856143 | 125856170 | (GGA)n      | Simple_repe:Simple_repeat |           |
| chr7 | 125999043 | 125999444 |      |           |           |             |                           |           |
| chr7 | 127778499 | 127778900 |      |           |           |             |                           |           |
| chr7 | 128061008 | 128061409 | chr7 | 128061030 | 128061112 | tRNA-Leu-CT | tRNA                      | tRNA      |
| chr7 | 128061008 | 128061409 | chr7 | 128061224 | 128061254 | GC_rich     | Low_comple:Low_complexity |           |
| chr7 | 128061008 | 128061409 | chr7 | 128061394 | 128061420 | GC_rich     | Low_comple:Low_complexity |           |
| chr7 | 129210745 | 129211146 |      |           |           |             |                           |           |
| chr7 | 129245194 | 129245595 |      |           |           |             |                           |           |
| chr7 | 129276305 | 129276706 |      |           |           |             |                           |           |
| chr7 | 129302696 | 129303097 |      |           |           |             |                           |           |
| chr7 | 130267441 | 130267842 | chr7 | 130267683 | 130267723 | (CCG)n      | Simple_repe:Simple_repeat |           |
| chr7 | 130521161 | 130521562 |      |           |           |             |                           |           |
| chr7 | 132587910 | 132588311 |      |           |           |             |                           |           |
| chr7 | 133520732 | 133521133 |      |           |           |             |                           |           |
| chr7 | 133540366 | 133540767 |      |           |           |             |                           |           |
| chr7 | 133630487 | 133630888 |      |           |           |             |                           |           |
| chr7 | 133709782 | 133710183 | chr7 | 133710125 | 133710222 | PB1D10      | SINE                      | Alu       |
| chr7 | 133792578 | 133792979 |      |           |           |             |                           |           |
| chr7 | 133924095 | 133924496 |      |           |           |             |                           |           |

|      |           |           |      |           |           |            |             |                |   |
|------|-----------|-----------|------|-----------|-----------|------------|-------------|----------------|---|
| chr7 | 133935782 | 133936183 | .    | .         | .         | .          | .           | .              | . |
| chr7 | 134005213 | 134005614 | .    | .         | .         | .          | .           | .              | . |
| chr7 | 134339339 | 134339740 | .    | .         | .         | .          | .           | .              | . |
| chr7 | 134655247 | 134655648 | chr7 | 134655113 | 134655250 | B1_Mur1    | SINE        | Alu            |   |
| chr7 | 134655247 | 134655648 | chr7 | 134655558 | 134655597 | (TGG)n     | Simple_repe | Simple_repeat  |   |
| chr7 | 134856582 | 134856983 | .    | .         | .         | .          | .           | .              | . |
| chr7 | 134888785 | 134889186 | .    | .         | .         | .          | .           | .              | . |
| chr7 | 134985904 | 134986305 | .    | .         | .         | .          | .           | .              | . |
| chr7 | 135020183 | 135020584 | chr7 | 135020174 | 135020298 | PB1D7      | SINE        | Alu            |   |
| chr7 | 135039083 | 135039484 | chr7 | 135039392 | 135039540 | B1_Mus2    | SINE        | Alu            |   |
| chr7 | 135047358 | 135047759 | chr7 | 135047247 | 135047407 | B2_Mm1t    | SINE        | B2             |   |
| chr7 | 135055796 | 135056197 | chr7 | 135055761 | 135055888 | B1_Mur1    | SINE        | Alu            |   |
| chr7 | 135381214 | 135381615 | .    | .         | .         | .          | .           | .              | . |
| chr7 | 135605043 | 135605444 | .    | .         | .         | .          | .           | .              | . |
| chr7 | 135888135 | 135888536 | chr7 | 135888060 | 135888163 | PB1D10     | SINE        | Alu            |   |
| chr7 | 136735103 | 136735504 | .    | .         | .         | .          | .           | .              | . |
| chr7 | 137662900 | 137663301 | chr7 | 137662985 | 137663049 | (CCG)n     | Simple_repe | Simple_repeat  |   |
| chr7 | 138009042 | 138009443 | .    | .         | .         | .          | .           | .              | . |
| chr7 | 138703405 | 138703806 | .    | .         | .         | .          | .           | .              | . |
| chr7 | 139802151 | 139802552 | .    | .         | .         | .          | .           | .              | . |
| chr7 | 140044168 | 140044569 | .    | .         | .         | .          | .           | .              | . |
| chr7 | 140050676 | 140051077 | .    | .         | .         | .          | .           | .              | . |
| chr7 | 146037737 | 146038138 | chr7 | 146038085 | 146038128 | (CGG)n     | Simple_repe | Simple_repeat  |   |
| chr7 | 147323306 | 147323707 | chr7 | 147323297 | 147323323 | AT_rich    | Low_comple  | Low_complexity |   |
| chr7 | 148042017 | 148042418 | .    | .         | .         | .          | .           | .              | . |
| chr7 | 148043055 | 148043456 | chr7 | 148043055 | 148043094 | (CACCC)n   | Simple_repe | Simple_repeat  |   |
| chr7 | 148068060 | 148068461 | .    | .         | .         | .          | .           | .              | . |
| chr7 | 148305395 | 148305796 | chr7 | 148305394 | 148305630 | RLTR42     | LTR         | ERVK           |   |
| chr7 | 148305395 | 148305796 | chr7 | 148305630 | 148305694 | MLT1J      | LTR         | MaLR           |   |
| chr7 | 148316963 | 148317364 | .    | .         | .         | .          | .           | .              | . |
| chr7 | 148414430 | 148414831 | .    | .         | .         | .          | .           | .              | . |
| chr7 | 148513920 | 148514321 | .    | .         | .         | .          | .           | .              | . |
| chr7 | 148577880 | 148578281 | .    | .         | .         | .          | .           | .              | . |
| chr7 | 148633024 | 148633425 | .    | .         | .         | .          | .           | .              | . |
| chr7 | 149246818 | 149247219 | .    | .         | .         | .          | .           | .              | . |
| chr7 | 150255067 | 150255468 | .    | .         | .         | .          | .           | .              | . |
| chr7 | 150785816 | 150786217 | .    | .         | .         | .          | .           | .              | . |
| chr7 | 150969830 | 150970231 | .    | .         | .         | .          | .           | .              | . |
| chr7 | 152100843 | 152101244 | .    | .         | .         | .          | .           | .              | . |
| chr8 | 3492927   | 3493328   | chr8 | 3493039   | 3493079   | GC_rich    | Low_comple  | Low_complexity |   |
| chr8 | 3500249   | 3500650   | .    | .         | .         | .          | .           | .              | . |
| chr8 | 3516629   | 3517030   | .    | .         | .         | .          | .           | .              | . |
| chr8 | 3620335   | 3620736   | chr8 | 3620701   | 3620850   | B1_Mur2    | SINE        | Alu            |   |
| chr8 | 3803130   | 3803531   | chr8 | 3802776   | 3803137   | RMER16-int | LTR         | ERVK           |   |
| chr8 | 3803130   | 3803531   | chr8 | 3803130   | 3803194   | MMVL30-int | LTR         | ERV1           |   |
| chr8 | 3803130   | 3803531   | chr8 | 3803356   | 3803440   | IAPEY-int  | LTR         | ERVK           |   |
| chr8 | 4275750   | 4276151   | .    | .         | .         | .          | .           | .              | . |
| chr8 | 4612872   | 4613273   | chr8 | 4612755   | 4612915   | RLTR13D3   | LTR         | ERVK           |   |
| chr8 | 4779403   | 4779804   | .    | .         | .         | .          | .           | .              | . |
| chr8 | 8690338   | 8690739   | chr8 | 8690320   | 8690407   | GC_rich    | Low_comple  | Low_complexity |   |
| chr8 | 11497354  | 11497755  | .    | .         | .         | .          | .           | .              | . |
| chr8 | 11555576  | 11555977  | .    | .         | .         | .          | .           | .              | . |
| chr8 | 12671923  | 12672324  | .    | .         | .         | .          | .           | .              | . |
| chr8 | 13159001  | 13159402  | chr8 | 13159058  | 13159091  | G-rich     | Low_comple  | Low_complexity |   |
| chr8 | 13159001  | 13159402  | chr8 | 13159390  | 13159411  | GC_rich    | Low_comple  | Low_complexity |   |
| chr8 | 13287932  | 13288333  | .    | .         | .         | .          | .           | .              | . |
| chr8 | 18594893  | 18595294  | chr8 | 18594736  | 18594940  | B3         | SINE        | B2             |   |
| chr8 | 19730774  | 19731175  | chr8 | 19730766  | 19730881  | RSINE1     | SINE        | B4             |   |
| chr8 | 19957499  | 19957900  | chr8 | 19957494  | 19957589  | RSINE1     | SINE        | B4             |   |
| chr8 | 19957499  | 19957900  | chr8 | 19957876  | 19957993  | B3         | SINE        | B2             |   |
| chr8 | 20020223  | 20020624  | .    | .         | .         | .          | .           | .              | . |
| chr8 | 23170935  | 23171336  | .    | .         | .         | .          | .           | .              | . |
| chr8 | 23296293  | 23296694  | .    | .         | .         | .          | .           | .              | . |
| chr8 | 23521634  | 23522035  | .    | .         | .         | .          | .           | .              | . |
| chr8 | 23917580  | 23917981  | .    | .         | .         | .          | .           | .              | . |
| chr8 | 26628991  | 26629392  | .    | .         | .         | .          | .           | .              | . |
| chr8 | 26712423  | 26712824  | chr8 | 26712724  | 26712770  | (CGG)n     | Simple_repe | Simple_repeat  |   |
| chr8 | 28135958  | 28136359  | chr8 | 28136121  | 28136198  | ID4        | SINE        | ID             |   |
| chr8 | 28135958  | 28136359  | chr8 | 28136233  | 28136368  | B1F2       | SINE        | Alu            |   |
| chr8 | 32260361  | 32260762  | chr8 | 32260332  | 32260440  | U13        | snRNA       | snRNA          |   |
| chr8 | 32279043  | 32279444  | .    | .         | .         | .          | .           | .              | . |
| chr8 | 34495917  | 34496318  | .    | .         | .         | .          | .           | .              | . |
| chr8 | 34752035  | 34752436  | .    | .         | .         | .          | .           | .              | . |
| chr8 | 34842160  | 34842561  | chr8 | 34842475  | 34842503  | GC_rich    | Low_comple  | Low_complexity |   |
| chr8 | 34842160  | 34842561  | chr8 | 34842524  | 34842557  | (GTG)n     | Simple_repe | Simple_repeat  |   |
| chr8 | 36028630  | 36029031  | .    | .         | .         | .          | .           | .              | . |
| chr8 | 41720213  | 41720614  | chr8 | 41720381  | 41720478  | PB1        | SINE        | Alu            |   |
| chr8 | 42324622  | 42325023  | .    | .         | .         | .          | .           | .              | . |
| chr8 | 47060606  | 47061007  | .    | .         | .         | .          | .           | .              | . |
| chr8 | 47637008  | 47637409  | .    | .         | .         | .          | .           | .              | . |
| chr8 | 48618656  | 48619057  | .    | .         | .         | .          | .           | .              | . |
| chr8 | 48799141  | 48799542  | .    | .         | .         | .          | .           | .              | . |
| chr8 | 59966550  | 59966951  | .    | .         | .         | .          | .           | .              | . |
| chr8 | 63369016  | 63369417  | .    | .         | .         | .          | .           | .              | . |
| chr8 | 63966294  | 63966695  | chr8 | 63966265  | 63966358  | PB1D7      | SINE        | Alu            |   |
| chr8 | 67472339  | 67472740  | .    | .         | .         | .          | .           | .              | . |
| chr8 | 69010300  | 69010701  | .    | .         | .         | .          | .           | .              | . |
| chr8 | 70018455  | 70018856  | .    | .         | .         | .          | .           | .              | . |
| chr8 | 72566514  | 72566915  | chr8 | 72566540  | 72566582  | (CCG)n     | Simple_repe | Simple_repeat  |   |
| chr8 | 72695993  | 72696394  | chr8 | 72695934  | 72696044  | B1_Mus1    | SINE        | Alu            |   |
| chr8 | 72695993  | 72696394  | chr8 | 72696044  | 72696100  | (CA)n      | Simple_repe | Simple_repeat  |   |
| chr8 | 72806578  | 72806979  | chr8 | 72806753  | 72806852  | C-rich     | Low_comple  | Low_complexity |   |
| chr8 | 72806578  | 72806979  | chr8 | 72806868  | 72806977  | (CGGG)n    | Simple_repe | Simple_repeat  |   |
| chr8 | 72826429  | 72826830  | .    | .         | .         | .          | .           | .              | . |
| chr8 | 73051669  | 73052070  | chr8 | 73051668  | 73051696  | GC_rich    | Low_comple  | Low_complexity |   |

|      |           |           |      |           |           |           |             |                |
|------|-----------|-----------|------|-----------|-----------|-----------|-------------|----------------|
| chr8 | 73196877  | 73197278  | chr8 | 73196780  | 73196916  | B1_Mus1   | SINE        | Alu            |
| chr8 | 73196877  | 73197278  | chr8 | 73196916  | 73196939  | (CAAAA)n  | Simple_repe | Simple_repeat  |
| chr8 | 73222458  | 73222859  | .    | .         | .         | .         | .           | .              |
| chr8 | 73397448  | 73397849  | .    | .         | .         | .         | .           | .              |
| chr8 | 73421296  | 73421697  | .    | .         | .         | .         | .           | .              |
| chr8 | 73906509  | 73906910  | .    | .         | .         | .         | .           | .              |
| chr8 | 73920553  | 73920954  | .    | .         | .         | .         | .           | .              |
| chr8 | 73988494  | 73988895  | .    | .         | .         | .         | .           | .              |
| chr8 | 73992694  | 73993095  | chr8 | 73992642  | 73992736  | PB1D7     | SINE        | Alu            |
| chr8 | 74012317  | 74012718  | .    | .         | .         | .         | .           | .              |
| chr8 | 74066528  | 74066929  | .    | .         | .         | .         | .           | .              |
| chr8 | 74432177  | 74432578  | .    | .         | .         | .         | .           | .              |
| chr8 | 74743378  | 74743779  | chr8 | 74743280  | 74743388  | B1F2      | SINE        | Alu            |
| chr8 | 74967538  | 74967939  | .    | .         | .         | .         | .           | .              |
| chr8 | 74998915  | 74999316  | .    | .         | .         | .         | .           | .              |
| chr8 | 75071986  | 75072387  | .    | .         | .         | .         | .           | .              |
| chr8 | 82163007  | 82163408  | .    | .         | .         | .         | .           | .              |
| chr8 | 83404271  | 83404672  | chr8 | 83404267  | 83404317  | GC_rich   | Low_comple  | Low_complexity |
| chr8 | 83404271  | 83404672  | chr8 | 83404510  | 83404539  | GC_rich   | Low_comple  | Low_complexity |
| chr8 | 83538620  | 83539021  | .    | .         | .         | .         | .           | .              |
| chr8 | 85856166  | 85856567  | .    | .         | .         | .         | .           | .              |
| chr8 | 86090447  | 86090848  | chr8 | 86090389  | 86090460  | B4A       | SINE        | B4             |
| chr8 | 86590213  | 86590614  | .    | .         | .         | .         | .           | .              |
| chr8 | 86671645  | 86672046  | .    | .         | .         | .         | .           | .              |
| chr8 | 87364371  | 87364772  | .    | .         | .         | .         | .           | .              |
| chr8 | 87380655  | 87381056  | chr8 | 87380561  | 87380657  | PB1D10    | SINE        | Alu            |
| chr8 | 87417114  | 87417515  | .    | .         | .         | .         | .           | .              |
| chr8 | 87489859  | 87490260  | chr8 | 87490241  | 87490358  | ID_B1     | SINE        | B4             |
| chr8 | 87550545  | 87550946  | .    | .         | .         | .         | .           | .              |
| chr8 | 88016196  | 88016597  | .    | .         | .         | .         | .           | .              |
| chr8 | 93593719  | 93594120  | .    | .         | .         | .         | .           | .              |
| chr8 | 93837049  | 93837450  | .    | .         | .         | .         | .           | .              |
| chr8 | 94879960  | 94880361  | .    | .         | .         | .         | .           | .              |
| chr8 | 96560867  | 96561268  | .    | .         | .         | .         | .           | .              |
| chr8 | 96738218  | 96738619  | chr8 | 96738336  | 96738364  | GC_rich   | Low_comple  | Low_complexity |
| chr8 | 97578778  | 97579179  | chr8 | 97578790  | 97578863  | MER63D    | DNA         | ACHobo         |
| chr8 | 97578778  | 97579179  | chr8 | 97578893  | 97578920  | (TGG)n    | Simple_repe | Simple_repeat  |
| chr8 | 98157188  | 98157589  | .    | .         | .         | .         | .           | .              |
| chr8 | 98331833  | 98332234  | .    | .         | .         | .         | .           | .              |
| chr8 | 98377268  | 98377669  | .    | .         | .         | .         | .           | .              |
| chr8 | 107165413 | 107165814 | .    | .         | .         | .         | .           | .              |
| chr8 | 107849994 | 107850395 | .    | .         | .         | .         | .           | .              |
| chr8 | 108160094 | 108160495 | chr8 | 108160191 | 108160250 | (CGCGG)n  | Simple_repe | Simple_repeat  |
| chr8 | 108160094 | 108160495 | chr8 | 108160356 | 108160377 | GC_rich   | Low_comple  | Low_complexity |
| chr8 | 108231956 | 108232357 | .    | .         | .         | .         | .           | .              |
| chr8 | 108351097 | 108351498 | .    | .         | .         | .         | .           | .              |
| chr8 | 108375769 | 108376170 | chr8 | 108376106 | 108376140 | AT_rich   | Low_comple  | Low_complexity |
| chr8 | 108375769 | 108376170 | chr8 | 108376166 | 108376317 | B3        | SINE        | B2             |
| chr8 | 108378520 | 108378921 | chr8 | 108378589 | 108378610 | (GGGTG)n  | Simple_repe | Simple_repeat  |
| chr8 | 108384274 | 108384675 | .    | .         | .         | .         | .           | .              |
| chr8 | 108404582 | 108404983 | .    | .         | .         | .         | .           | .              |
| chr8 | 108583124 | 108583525 | chr8 | 108583445 | 108583549 | G-rich    | Low_comple  | Low_complexity |
| chr8 | 108734620 | 108735021 | .    | .         | .         | .         | .           | .              |
| chr8 | 108861892 | 108862293 | .    | .         | .         | .         | .           | .              |
| chr8 | 108938958 | 108939359 | chr8 | 108938974 | 108939026 | (CA)n     | Simple_repe | Simple_repeat  |
| chr8 | 109572359 | 109572760 | .    | .         | .         | .         | .           | .              |
| chr8 | 109580440 | 109580841 | .    | .         | .         | .         | .           | .              |
| chr8 | 109620311 | 109620712 | chr8 | 109620680 | 109620792 | PB1D9     | SINE        | Alu            |
| chr8 | 109927000 | 109927401 | .    | .         | .         | .         | .           | .              |
| chr8 | 110112204 | 110112605 | chr8 | 110112512 | 110112548 | (TTTTTG)n | Simple_repe | Simple_repeat  |
| chr8 | 112089328 | 112089729 | .    | .         | .         | .         | .           | .              |
| chr8 | 112231127 | 112231528 | chr8 | 112231304 | 112231422 | B1_Mm     | SINE        | Alu            |
| chr8 | 112231127 | 112231528 | chr8 | 112231445 | 112231554 | PB1D10    | SINE        | Alu            |
| chr8 | 112302252 | 112302653 | .    | .         | .         | .         | .           | .              |
| chr8 | 112740122 | 112740523 | chr8 | 112740032 | 112740219 | Lx8       | LINE        | L1             |
| chr8 | 112740122 | 112740523 | chr8 | 112740422 | 112740815 | L1ME2     | LINE        | L1             |
| chr8 | 113370696 | 113371097 | .    | .         | .         | .         | .           | .              |
| chr8 | 113426181 | 113426582 | chr8 | 113426538 | 113426586 | (TTTG)n   | Simple_repe | Simple_repeat  |
| chr8 | 113443400 | 113443801 | .    | .         | .         | .         | .           | .              |
| chr8 | 113557470 | 113557871 | .    | .         | .         | .         | .           | .              |
| chr8 | 113579962 | 113580363 | .    | .         | .         | .         | .           | .              |
| chr8 | 114045966 | 114046367 | .    | .         | .         | .         | .           | .              |
| chr8 | 114167107 | 114167508 | .    | .         | .         | .         | .           | .              |
| chr8 | 114255868 | 114256269 | chr8 | 114255907 | 114255930 | GC_rich   | Low_comple  | Low_complexity |
| chr8 | 114378123 | 114378524 | chr8 | 114378443 | 114378860 | MER82     | DNA         | MER2_type      |
| chr8 | 114516025 | 114516426 | .    | .         | .         | .         | .           | .              |
| chr8 | 114535039 | 114535440 | .    | .         | .         | .         | .           | .              |
| chr8 | 116963130 | 116963531 | chr8 | 116962964 | 116963169 | RMER30    | DNA         | MER1_type      |
| chr8 | 119502747 | 119503148 | .    | .         | .         | .         | .           | .              |
| chr8 | 121868156 | 121868557 | .    | .         | .         | .         | .           | .              |
| chr8 | 122082510 | 122082911 | .    | .         | .         | .         | .           | .              |
| chr8 | 122625132 | 122625533 | .    | .         | .         | .         | .           | .              |
| chr8 | 123191942 | 123192343 | chr8 | 123192030 | 123192099 | (CCCCG)n  | Simple_repe | Simple_repeat  |
| chr8 | 124473866 | 124474267 | .    | .         | .         | .         | .           | .              |
| chr8 | 125589112 | 125589513 | chr8 | 125589450 | 125589485 | GC_rich   | Low_comple  | Low_complexity |
| chr8 | 125626071 | 125626472 | .    | .         | .         | .         | .           | .              |
| chr8 | 127245774 | 127246175 | .    | .         | .         | .         | .           | .              |
| chr8 | 128946908 | 128947309 | .    | .         | .         | .         | .           | .              |
| chr8 | 129494822 | 129495223 | .    | .         | .         | .         | .           | .              |
| chr9 | 3037996   | 3038397   | chr9 | 3000002   | 3038419   | GSAT_MM   | Satellite   | Satellite      |
| chr9 | 3335252   | 3335653   | chr9 | 3334707   | 3335338   | Lx9       | LINE        | L1             |
| chr9 | 7184302   | 7184703   | .    | .         | .         | .         | .           | .              |
| chr9 | 7836876   | 7837277   | .    | .         | .         | .         | .           | .              |
| chr9 | 13553420  | 13553821  | .    | .         | .         | .         | .           | .              |
| chr9 | 14304848  | 14305249  | chr9 | 14304967  | 14304987  | (A)n      | Simple_repe | Simple_repeat  |

|      |           |                |           |                         |                           |      |
|------|-----------|----------------|-----------|-------------------------|---------------------------|------|
| chr9 | 15084203  | 15084604 chr9  | 15084535  | 15084576 (TTTG)n        | Simple_repe:Simple_repeat |      |
| chr9 | 18096339  | 18096740       |           |                         |                           |      |
| chr9 | 19426218  | 19426619 chr9  | 19426199  | 19426243 HAL1-3A_MELINE | L1                        |      |
| chr9 | 19426218  | 19426619 chr9  | 19426456  | 19426596 LTR33C         | LTR                       | ERVL |
| chr9 | 20189395  | 20189796       |           |                         |                           |      |
| chr9 | 20264296  | 20264697       |           |                         |                           |      |
| chr9 | 20692478  | 20692879       |           |                         |                           |      |
| chr9 | 20877792  | 20878193 chr9  | 20878109  | 20878172 B3             | SINE                      | B2   |
| chr9 | 20896235  | 20896636       |           |                         |                           |      |
| chr9 | 21300894  | 21301295 chr9  | 21301271  | 21301330 (TG)n          | Simple_repe:Simple_repeat |      |
| chr9 | 21397105  | 21397506       |           |                         |                           |      |
| chr9 | 22215648  | 22216049       |           |                         |                           |      |
| chr9 | 22279920  | 22280321       |           |                         |                           |      |
| chr9 | 25059856  | 25060257 chr9  | 25059863  | 25059890 (A)n           | Simple_repe:Simple_repeat |      |
| chr9 | 26807008  | 26807409       |           |                         |                           |      |
| chr9 | 30234408  | 30234809       |           |                         |                           |      |
| chr9 | 30837774  | 30838175 chr9  | 30837949  | 30837972 GC_rich        | Low_comple:Low_complexity |      |
| chr9 | 30837774  | 30838175 chr9  | 30838036  | 30838067 (CCCG)n        | Simple_repe:Simple_repeat |      |
| chr9 | 34983472  | 34983873       |           |                         |                           |      |
| chr9 | 35366805  | 35367206       |           |                         |                           |      |
| chr9 | 36604833  | 36605234       |           |                         |                           |      |
| chr9 | 42280123  | 42280524       |           |                         |                           |      |
| chr9 | 44142262  | 44142663 chr9  | 44142153  | 44142299 B1_Mus1        | SINE                      | Alu  |
| chr9 | 44215537  | 44215938       |           |                         |                           |      |
| chr9 | 44225963  | 44226364       |           |                         |                           |      |
| chr9 | 44580786  | 44581187       |           |                         |                           |      |
| chr9 | 44728633  | 44729034       |           |                         |                           |      |
| chr9 | 45636639  | 45637040       |           |                         |                           |      |
| chr9 | 45646412  | 45646813 chr9  | 45646394  | 45646437 (TAAA)n        | Simple_repe:Simple_repeat |      |
| chr9 | 45761831  | 45762232       |           |                         |                           |      |
| chr9 | 48288600  | 48289001       |           |                         |                           |      |
| chr9 | 48302739  | 48303140       |           |                         |                           |      |
| chr9 | 48863479  | 48863880       |           |                         |                           |      |
| chr9 | 50336647  | 50337048       |           |                         |                           |      |
| chr9 | 50411711  | 50412112       |           |                         |                           |      |
| chr9 | 53212501  | 53212902 chr9  | 53212420  | 53212770 RLTR15         | LTR                       | ERVK |
| chr9 | 56008636  | 56009037       |           |                         |                           |      |
| chr9 | 56266228  | 56266629       |           |                         |                           |      |
| chr9 | 56798428  | 56798829       |           |                         |                           |      |
| chr9 | 56978295  | 56978696 chr9  | 56978293  | 56978347 ID             | SINE                      | ID   |
| chr9 | 56995791  | 56996192       |           |                         |                           |      |
| chr9 | 57005889  | 57006290       |           |                         |                           |      |
| chr9 | 57287779  | 57288180 chr9  | 57288083  | 57288217 L1MEe          | LINE                      | L1   |
| chr9 | 57400402  | 57400803 chr9  | 57400733  | 57400879 L2a            | LINE                      | L2   |
| chr9 | 57758566  | 57758967 chr9  | 57758960  | 57759085 MIRb           | SINE                      | MIR  |
| chr9 | 58158914  | 58159315 chr9  | 58158919  | 58159066 B1_Mm          | SINE                      | Alu  |
| chr9 | 58301756  | 58302157       |           |                         |                           |      |
| chr9 | 62659630  | 62660031       |           |                         |                           |      |
| chr9 | 63225549  | 63225950       |           |                         |                           |      |
| chr9 | 63246999  | 63247400       |           |                         |                           |      |
| chr9 | 64585440  | 64585841       |           |                         |                           |      |
| chr9 | 65062273  | 65062674 chr9  | 65062186  | 65062364 B3A            | SINE                      | B2   |
| chr9 | 65062273  | 65062674 chr9  | 65062213  | 65062376 RSINE1         | SINE                      | B4   |
| chr9 | 65524080  | 65524481 chr9  | 65523928  | 65524125 B3             | SINE                      | B2   |
| chr9 | 65676350  | 65676751       |           |                         |                           |      |
| chr9 | 65732705  | 65733106       |           |                         |                           |      |
| chr9 | 65756527  | 65756928 chr9  | 65756819  | 65756870 CT-rich        | Low_comple:Low_complexity |      |
| chr9 | 65907596  | 65907997       |           |                         |                           |      |
| chr9 | 65974221  | 65974622       |           |                         |                           |      |
| chr9 | 66767424  | 66767825       |           |                         |                           |      |
| chr9 | 69837088  | 69837489       |           |                         |                           |      |
| chr9 | 69860170  | 69860571 chr9  | 69860471  | 69860517 GC_rich        | Low_comple:Low_complexity |      |
| chr9 | 70054815  | 70055216       |           |                         |                           |      |
| chr9 | 72122430  | 72122831 chr9  | 72122766  | 72122802 (TCC)n         | Simple_repe:Simple_repeat |      |
| chr9 | 72378043  | 72378444       |           |                         |                           |      |
| chr9 | 72833095  | 72833496       |           |                         |                           |      |
| chr9 | 72961026  | 72961427 chr9  | 72961098  | 72961151 (CTG)n         | Simple_repe:Simple_repeat |      |
| chr9 | 74885227  | 74885628       |           |                         |                           |      |
| chr9 | 74918755  | 74919156 chr9  | 74918973  | 74918997 (CGG)n         | Simple_repe:Simple_repeat |      |
| chr9 | 75162940  | 75163341 chr9  | 75162954  | 75162978 (TTTTG)n       | Simple_repe:Simple_repeat |      |
| chr9 | 75162940  | 75163341 chr9  | 75162984  | 75163056 LTR16E1        | LTR                       | ERVL |
| chr9 | 75407325  | 75407726 chr9  | 75407684  | 75407711 (T)n           | Simple_repe:Simple_repeat |      |
| chr9 | 77956718  | 77957119       |           |                         |                           |      |
| chr9 | 78023386  | 78023787 chr9  | 78023108  | 78023440 7SK            | RNA                       | RNA  |
| chr9 | 78329308  | 78329709       |           |                         |                           |      |
| chr9 | 82723340  | 82723741       |           |                         |                           |      |
| chr9 | 83334530  | 83334931       |           |                         |                           |      |
| chr9 | 85642842  | 85643243       |           |                         |                           |      |
| chr9 | 86360613  | 86361014       |           |                         |                           |      |
| chr9 | 87150220  | 87150621       |           |                         |                           |      |
| chr9 | 88333798  | 88334199       |           |                         |                           |      |
| chr9 | 88442657  | 88443058       |           |                         |                           |      |
| chr9 | 89599564  | 89599965       |           |                         |                           |      |
| chr9 | 90009431  | 90009832       |           |                         |                           |      |
| chr9 | 90165465  | 90165866 chr9  | 90165449  | 90165622 C-rich         | Low_comple:Low_complexity |      |
| chr9 | 90165465  | 90165866 chr9  | 90165565  | 90165694 (CCGCG)n       | Simple_repe:Simple_repeat |      |
| chr9 | 95412184  | 95412585       |           |                         |                           |      |
| chr9 | 97011492  | 97011893       |           |                         |                           |      |
| chr9 | 98501910  | 98502311 chr9  | 98502186  | 98502246 B4             | SINE                      | B4   |
| chr9 | 99468985  | 99469386 chr9  | 99469089  | 99469112 GC_rich        | Low_comple:Low_complexity |      |
| chr9 | 103104279 | 103104680 chr9 | 103104620 | 103104697 Lx8           | LINE                      | L1   |
| chr9 | 103207219 | 103207620 chr9 | 103207586 | 103207667 GC_rich       | Low_comple:Low_complexity |      |
| chr9 | 105297438 | 105297839      |           |                         |                           |      |
| chr9 | 106062205 | 106062606      |           |                         |                           |      |
| chr9 | 106073028 | 106073429      |           |                         |                           |      |

|      |           |           |      |           |           |          |             |                |   |
|------|-----------|-----------|------|-----------|-----------|----------|-------------|----------------|---|
| chr9 | 106183140 | 106183541 | .    | .         | .         | .        | .           | .              | . |
| chr9 | 106331605 | 106332006 | chr9 | 106331572 | 106331667 | PB1D10   | SINE        | Alu            | . |
| chr9 | 106723893 | 106724294 | .    | .         | .         | .        | .           | .              | . |
| chr9 | 106793505 | 106793906 | .    | .         | .         | .        | .           | .              | . |
| chr9 | 107436037 | 107436438 | chr9 | 107436348 | 107436387 | GC_rich  | Low_comple  | Low_complexity | . |
| chr9 | 107444040 | 107444441 | .    | .         | .         | .        | .           | .              | . |
| chr9 | 107465238 | 107465639 | .    | .         | .         | .        | .           | .              | . |
| chr9 | 107489750 | 107490151 | .    | .         | .         | .        | .           | .              | . |
| chr9 | 107673194 | 107673595 | .    | .         | .         | .        | .           | .              | . |
| chr9 | 107774979 | 107775380 | .    | .         | .         | .        | .           | .              | . |
| chr9 | 107790262 | 107790663 | .    | .         | .         | .        | .           | .              | . |
| chr9 | 107853065 | 107853466 | .    | .         | .         | .        | .           | .              | . |
| chr9 | 108192551 | 108192952 | .    | .         | .         | .        | .           | .              | . |
| chr9 | 108208314 | 108208715 | chr9 | 108208698 | 108208755 | (CCCC)n  | Simple_repe | Simple_repeat  | . |
| chr9 | 108362629 | 108363030 | .    | .         | .         | .        | .           | .              | . |
| chr9 | 108551530 | 108551931 | chr9 | 108551585 | 108551628 | (CAGG)n  | Simple_repe | Simple_repeat  | . |
| chr9 | 108984760 | 108985161 | .    | .         | .         | .        | .           | .              | . |
| chr9 | 109777601 | 109778002 | chr9 | 109777677 | 109777714 | (A)n     | Simple_repe | Simple_repeat  | . |
| chr9 | 110019753 | 110020154 | .    | .         | .         | .        | .           | .              | . |
| chr9 | 110207755 | 110208156 | .    | .         | .         | .        | .           | .              | . |
| chr9 | 110235621 | 110236022 | chr9 | 110235885 | 110235907 | GC_rich  | Low_comple  | Low_complexity | . |
| chr9 | 110310606 | 110311007 | .    | .         | .         | .        | .           | .              | . |
| chr9 | 111020395 | 111020796 | .    | .         | .         | .        | .           | .              | . |
| chr9 | 111174034 | 111174435 | .    | .         | .         | .        | .           | .              | . |
| chr9 | 113839840 | 113840241 | chr9 | 113840194 | 113840273 | G-rich   | Low_comple  | Low_complexity | . |
| chr9 | 114549230 | 114549631 | .    | .         | .         | .        | .           | .              | . |
| chr9 | 114842983 | 114843384 | .    | .         | .         | .        | .           | .              | . |
| chr9 | 117949345 | 117949746 | .    | .         | .         | .        | .           | .              | . |
| chr9 | 119353777 | 119354178 | .    | .         | .         | .        | .           | .              | . |
| chr9 | 121905003 | 121905404 | .    | .         | .         | .        | .           | .              | . |
| chr9 | 122795729 | 122796130 | .    | .         | .         | .        | .           | .              | . |
| chr9 | 123760972 | 123761373 | .    | .         | .         | .        | .           | .              | . |
| chrX | 7182352   | 7182753   | .    | .         | .         | .        | .           | .              | . |
| chrX | 7273980   | 7274381   | chrX | 7273970   | 7274095   | B3       | SINE        | B2             | . |
| chrX | 7305420   | 7305821   | .    | .         | .         | .        | .           | .              | . |
| chrX | 7418955   | 7419356   | chrX | 7419299   | 7419340   | GC_rich  | Low_comple  | Low_complexity | . |
| chrX | 7709046   | 7709447   | .    | .         | .         | .        | .           | .              | . |
| chrX | 7829343   | 7829744   | .    | .         | .         | .        | .           | .              | . |
| chrX | 12250512  | 12250913  | .    | .         | .         | .        | .           | .              | . |
| chrX | 17149335  | 17149736  | chrX | 17149618  | 17149680  | T-rich   | Low_comple  | Low_complexity | . |
| chrX | 20235199  | 20235600  | .    | .         | .         | .        | .           | .              | . |
| chrX | 20265846  | 20266247  | chrX | 20265863  | 20265905  | GC_rich  | Low_comple  | Low_complexity | . |
| chrX | 34650342  | 34650743  | chrX | 34650735  | 34650884  | B1_Mus1  | SINE        | Alu            | . |
| chrX | 35954205  | 35954606  | .    | .         | .         | .        | .           | .              | . |
| chrX | 35987873  | 35988274  | .    | .         | .         | .        | .           | .              | . |
| chrX | 39264919  | 39265320  | .    | .         | .         | .        | .           | .              | . |
| chrX | 45947588  | 45947989  | chrX | 45947569  | 45947644  | GA-rich  | Low_comple  | Low_complexity | . |
| chrX | 45976678  | 45977079  | chrX | 45977028  | 45977080  | (CCGG)n  | Simple_repe | Simple_repeat  | . |
| chrX | 46048072  | 46048473  | .    | .         | .         | .        | .           | .              | . |
| chrX | 46641412  | 46641813  | .    | .         | .         | .        | .           | .              | . |
| chrX | 50723457  | 50723858  | .    | .         | .         | .        | .           | .              | . |
| chrX | 51100691  | 51101092  | .    | .         | .         | .        | .           | .              | . |
| chrX | 53599292  | 53599693  | .    | .         | .         | .        | .           | .              | . |
| chrX | 53851030  | 53851431  | .    | .         | .         | .        | .           | .              | . |
| chrX | 57657864  | 57658265  | .    | .         | .         | .        | .           | .              | . |
| chrX | 68467777  | 68468178  | chrX | 68467797  | 68467825  | (T)n     | Simple_repe | Simple_repeat  | . |
| chrX | 68617738  | 68618139  | .    | .         | .         | .        | .           | .              | . |
| chrX | 68746370  | 68746771  | .    | .         | .         | .        | .           | .              | . |
| chrX | 71674804  | 71675205  | chrX | 71674730  | 71674833  | PB1D9    | SINE        | Alu            | . |
| chrX | 92853654  | 92854055  | .    | .         | .         | .        | .           | .              | . |
| chrX | 93152230  | 93152631  | chrX | 93152611  | 93152636  | (T)n     | Simple_repe | Simple_repeat  | . |
| chrX | 94571818  | 94572219  | .    | .         | .         | .        | .           | .              | . |
| chrX | 96086163  | 96086564  | .    | .         | .         | .        | .           | .              | . |
| chrX | 97689391  | 97689792  | .    | .         | .         | .        | .           | .              | . |
| chrX | 98417802  | 98418203  | chrX | 98417880  | 98417916  | (CAGG)n  | Simple_repe | Simple_repeat  | . |
| chrX | 98449229  | 98449630  | .    | .         | .         | .        | .           | .              | . |
| chrX | 98727693  | 98728094  | .    | .         | .         | .        | .           | .              | . |
| chrX | 98835145  | 98835546  | .    | .         | .         | .        | .           | .              | . |
| chrX | 99314610  | 99315011  | .    | .         | .         | .        | .           | .              | . |
| chrX | 99700552  | 99700953  | .    | .         | .         | .        | .           | .              | . |
| chrX | 101608994 | 101609395 | chrX | 101609390 | 101609486 | MER53    | DNA         | hAT            | . |
| chrX | 102265327 | 102265728 | .    | .         | .         | .        | .           | .              | . |
| chrX | 103210775 | 103211176 | .    | .         | .         | .        | .           | .              | . |
| chrX | 110298986 | 110299387 | .    | .         | .         | .        | .           | .              | . |
| chrX | 132420233 | 132420634 | .    | .         | .         | .        | .           | .              | . |
| chrX | 132705700 | 132706101 | chrX | 132705736 | 132705800 | C-rich   | Low_comple  | Low_complexity | . |
| chrX | 133276049 | 133276450 | .    | .         | .         | .        | .           | .              | . |
| chrX | 136219251 | 136219652 | .    | .         | .         | .        | .           | .              | . |
| chrX | 136532938 | 136533339 | .    | .         | .         | .        | .           | .              | . |
| chrX | 137491178 | 137491579 | .    | .         | .         | .        | .           | .              | . |
| chrX | 147778177 | 147778578 | .    | .         | .         | .        | .           | .              | . |
| chrX | 147955453 | 147955854 | .    | .         | .         | .        | .           | .              | . |
| chrX | 148450784 | 148451185 | .    | .         | .         | .        | .           | .              | . |
| chrX | 148803147 | 148803548 | .    | .         | .         | .        | .           | .              | . |
| chrX | 155970375 | 155970776 | chrX | 155970687 | 155970742 | (CGG)n   | Simple_repe | Simple_repeat  | . |
| chrX | 159267388 | 159267789 | .    | .         | .         | .        | .           | .              | . |
| chrX | 159339414 | 159339815 | chrX | 159339442 | 159339494 | GA-rich  | Low_comple  | Low_complexity | . |
| chrX | 160396402 | 160396803 | .    | .         | .         | .        | .           | .              | . |
| chrX | 161418412 | 161418813 | chrX | 161418802 | 161418914 | PB1D7    | SINE        | Alu            | . |
| chrX | 163820673 | 163821074 | chrX | 163821063 | 163821325 | Cheshire | DNA         | MER1_type      | . |
| chrX | 165110403 | 165110804 | .    | .         | .         | .        | .           | .              | . |

3T3 cells

| Zfp143 peaks <= 2kb from TSS |          | Repeats from repeatMasker (USCS) table |            |          |          |           |             |                |
|------------------------------|----------|----------------------------------------|------------|----------|----------|-----------|-------------|----------------|
| Chromosome                   | Start    | End                                    | Chromosome | Start    | End      | repName   | repClass    | repFamily      |
| chr1                         | 5005376  | 5005777                                | .          | .        | .        | .         | .           | .              |
| chr1                         | 7387573  | 7387974                                | chr1       | 7387592  | 7387630  | (TAAA)n   | Simple_repe | Simple_repeat  |
| chr1                         | 7387573  | 7387974                                | chr1       | 7387642  | 7387678  | AT_rich   | Low_comple  | Low_complexity |
| chr1                         | 12634710 | 12635111                               | chr1       | 12634715 | 12634833 | MIR       | SINE        | MIR            |
| chr1                         | 12634710 | 12635111                               | chr1       | 12634855 | 12634921 | (GAATG)n  | Simple_repe | Simple_repeat  |
| chr1                         | 12634710 | 12635111                               | chr1       | 12635016 | 12635189 | Lx7       | LINE        | L1             |
| chr1                         | 16218359 | 16218760                               | .          | .        | .        | .         | .           | .              |
| chr1                         | 20856925 | 20857326                               | chr1       | 20857046 | 20857137 | RLTR15    | LTR         | ERVK           |
| chr1                         | 20856925 | 20857326                               | chr1       | 20857289 | 20857445 | RLTR15    | LTR         | ERVK           |
| chr1                         | 24462372 | 24462773                               | chr1       | 24462413 | 24462564 | MER31B    | LTR         | ERV1           |
| chr1                         | 24619754 | 24620155                               | .          | .        | .        | .         | .           | .              |
| chr1                         | 24740719 | 24741120                               | chr1       | 24740747 | 24740864 | L1ME1     | LINE        | L1             |
| chr1                         | 31387822 | 31388223                               | chr1       | 31387924 | 31388048 | MLT1J     | LTR         | MaLR           |
| chr1                         | 31850821 | 31851222                               | chr1       | 31850716 | 31850863 | B1_Mus1   | SINE        | Alu            |
| chr1                         | 31850821 | 31851222                               | chr1       | 31851105 | 31851207 | MIR       | SINE        | MIR            |
| chr1                         | 34166348 | 34166749                               | chr1       | 34166346 | 34166493 | B1_Mur2   | SINE        | Alu            |
| chr1                         | 34166348 | 34166749                               | chr1       | 34166504 | 34166535 | (CAGA)n   | Simple_repe | Simple_repeat  |
| chr1                         | 34166348 | 34166749                               | chr1       | 34166731 | 34166797 | GA-rich   | Low_comple  | Low_complexity |
| chr1                         | 34196913 | 34197314                               | .          | .        | .        | .         | .           | .              |
| chr1                         | 36360465 | 36360866                               | chr1       | 36360759 | 36360799 | MIR       | SINE        | MIR            |
| chr1                         | 36382825 | 36383226                               | chr1       | 36382982 | 36383088 | MER117    | DNA         | MER1_type      |
| chr1                         | 36489936 | 36490337                               | chr1       | 36489846 | 36489950 | RSINE1    | SINE        | B4             |
| chr1                         | 36489936 | 36490337                               | chr1       | 36490312 | 36490445 | RSINE1    | SINE        | B4             |
| chr1                         | 39770929 | 39771330                               | .          | .        | .        | .         | .           | .              |
| chr1                         | 39963746 | 39964147                               | .          | .        | .        | .         | .           | .              |
| chr1                         | 40415579 | 40415980                               | .          | .        | .        | .         | .           | .              |
| chr1                         | 40450203 | 40450604                               | chr1       | 40450599 | 40450840 | MLT1B     | LTR         | MaLR           |
| chr1                         | 40714852 | 40715253                               | .          | .        | .        | .         | .           | .              |
| chr1                         | 40789741 | 40790142                               | .          | .        | .        | .         | .           | .              |
| chr1                         | 43204302 | 43204703                               | chr1       | 43204302 | 43204521 | MER44B    | DNA         | MER2_type      |
| chr1                         | 43281035 | 43281436                               | chr1       | 43281041 | 43281112 | Tigger7   | DNA         | MER2_type      |
| chr1                         | 43326465 | 43326866                               | chr1       | 43326814 | 43327482 | L1Md_F3   | LINE        | L1             |
| chr1                         | 45684610 | 45685011                               | .          | .        | .        | .         | .           | .              |
| chr1                         | 45894582 | 45894983                               | chr1       | 45894649 | 45894690 | MLT1L     | LTR         | MaLR           |
| chr1                         | 48938216 | 48938617                               | .          | .        | .        | .         | .           | .              |
| chr1                         | 51182732 | 51183133                               | .          | .        | .        | .         | .           | .              |
| chr1                         | 51273975 | 51274376                               | .          | .        | .        | .         | .           | .              |
| chr1                         | 51321900 | 51322301                               | chr1       | 51321901 | 51321960 | A-rich    | Low_comple  | Low_complexity |
| chr1                         | 51582702 | 51583103                               | chr1       | 51583033 | 51583063 | AT_rich   | Low_comple  | Low_complexity |
| chr1                         | 51725900 | 51726301                               | chr1       | 51725965 | 51726078 | RLTR15    | LTR         | ERVK           |
| chr1                         | 51725900 | 51726301                               | chr1       | 51726181 | 51726360 | RLTR15    | LTR         | ERVK           |
| chr1                         | 52170552 | 52170953                               | .          | .        | .        | .         | .           | .              |
| chr1                         | 53894898 | 53895299                               | .          | .        | .        | .         | .           | .              |
| chr1                         | 53902102 | 53902503                               | .          | .        | .        | .         | .           | .              |
| chr1                         | 53997050 | 53997451                               | .          | .        | .        | .         | .           | .              |
| chr1                         | 54987478 | 54987879                               | chr1       | 54987392 | 54987773 | RMER10B   | LTR         | ERV1           |
| chr1                         | 55467456 | 55467857                               | .          | .        | .        | .         | .           | .              |
| chr1                         | 56014680 | 56015081                               | .          | .        | .        | .         | .           | .              |
| chr1                         | 57111482 | 57111883                               | chr1       | 57111444 | 57111555 | MTC       | LTR         | MaLR           |
| chr1                         | 57111482 | 57111883                               | chr1       | 57111606 | 57111696 | B1F       | SINE        | Alu            |
| chr1                         | 58314016 | 58314417                               | chr1       | 58314254 | 58314282 | (CA)n     | Simple_repe | Simple_repeat  |
| chr1                         | 58416349 | 58416750                               | .          | .        | .        | .         | .           | .              |
| chr1                         | 58422683 | 58423084                               | chr1       | 58423026 | 58423156 | B1_Mus2   | SINE        | Alu            |
| chr1                         | 58818314 | 58818715                               | .          | .        | .        | .         | .           | .              |
| chr1                         | 58854253 | 58854654                               | .          | .        | .        | .         | .           | .              |
| chr1                         | 59002984 | 59003385                               | .          | .        | .        | .         | .           | .              |
| chr1                         | 59521714 | 59522115                               | .          | .        | .        | .         | .           | .              |
| chr1                         | 59637080 | 59637481                               | .          | .        | .        | .         | .           | .              |
| chr1                         | 60681070 | 60681471                               | chr1       | 60681007 | 60681337 | RLTR15    | LTR         | ERVK           |
| chr1                         | 60681070 | 60681471                               | chr1       | 60681437 | 60681469 | (CAAAAA)n | Simple_repe | Simple_repeat  |
| chr1                         | 60882662 | 60883063                               | .          | .        | .        | .         | .           | .              |
| chr1                         | 62768422 | 62768823                               | chr1       | 62768811 | 62768849 | (CA)n     | Simple_repe | Simple_repeat  |
| chr1                         | 63822980 | 63823381                               | .          | .        | .        | .         | .           | .              |
| chr1                         | 64272664 | 64273065                               | .          | .        | .        | .         | .           | .              |
| chr1                         | 64347719 | 64348120                               | chr1       | 64348117 | 64348265 | MIR3      | SINE        | MIR            |
| chr1                         | 65158623 | 65159024                               | .          | .        | .        | .         | .           | .              |
| chr1                         | 65400711 | 65401112                               | chr1       | 65400590 | 65401107 | RLTR19B   | LTR         | ERVK           |
| chr1                         | 65400711 | 65401112                               | chr1       | 65401107 | 65401243 | B1_Mus1   | SINE        | Alu            |
| chr1                         | 65436186 | 65436587                               | chr1       | 65436342 | 65436407 | MIR       | SINE        | MIR            |
| chr1                         | 65436186 | 65436587                               | chr1       | 65436547 | 65436567 | (CA)n     | Simple_repe | Simple_repeat  |
| chr1                         | 65436186 | 65436587                               | chr1       | 65436567 | 65436593 | (CG)n     | Simple_repe | Simple_repeat  |
| chr1                         | 71798946 | 71799347                               | chr1       | 71799313 | 71800188 | RMER19B   | LTR         | ERVK           |
| chr1                         | 72081079 | 72081480                               | .          | .        | .        | .         | .           | .              |
| chr1                         | 72117034 | 72117435                               | .          | .        | .        | .         | .           | .              |
| chr1                         | 72230151 | 72230552                               | chr1       | 72230414 | 72230488 | ID2       | SINE        | ID             |
| chr1                         | 72230151 | 72230552                               | chr1       | 72230496 | 72230699 | B4A       | SINE        | B4             |
| chr1                         | 72272395 | 72272796                               | .          | .        | .        | .         | .           | .              |
| chr1                         | 72283097 | 72283498                               | .          | .        | .        | .         | .           | .              |
| chr1                         | 72290433 | 72290834                               | chr1       | 72290786 | 72290971 | U2        | snRNA       | snRNA          |
| chr1                         | 72301249 | 72301650                               | chr1       | 72301581 | 72301768 | U2        | snRNA       | snRNA          |
| chr1                         | 72348460 | 72348861                               | chr1       | 72348521 | 72348731 | MLT1J     | LTR         | MaLR           |
| chr1                         | 72348460 | 72348861                               | chr1       | 72348460 | 72348830 | AT_rich   | Low_comple  | Low_complexity |
| chr1                         | 74075339 | 74075740                               | .          | .        | .        | .         | .           | .              |
| chr1                         | 74223763 | 74224164                               | chr1       | 74224021 | 74224129 | HAL1      | LINE        | L1             |
| chr1                         | 74433328 | 74433729                               | .          | .        | .        | .         | .           | .              |
| chr1                         | 75241414 | 75241815                               | .          | .        | .        | .         | .           | .              |
| chr1                         | 75289512 | 75289913                               | .          | .        | .        | .         | .           | .              |
| chr1                         | 75556152 | 75556553                               | .          | .        | .        | .         | .           | .              |
| chr1                         | 75650304 | 75650705                               | chr1       | 75650567 | 75650642 | MER63D    | DNA         | AcHobo         |
| chr1                         | 77549396 | 77549797                               | .          | .        | .        | .         | .           | .              |
| chr1                         | 78534108 | 78534509                               | .          | .        | .        | .         | .           | .              |
| chr1                         | 82808242 | 82808643                               | .          | .        | .        | .         | .           | .              |

| repName count | repClass count | repFamily count |     |             |     |
|---------------|----------------|-----------------|-----|-------------|-----|
| MLT1J         | 69             | SINE            | 620 | Simple_repe | 335 |
| (TG)n         | 60             | LTR             | 585 | MaLR        | 287 |
| B3            | 54             | Simple_repe     | 335 | Alu         | 197 |
| (CA)n         | 52             | LINE            | 258 | L1          | 191 |
| ID_B1         | 49             | DNA             | 109 | B4          | 149 |
| RSINE1        | 42             | Low_comple      | 100 | ERVK        | 133 |
| RLTR15        | 39             | Satellite       | 49  | B2          | 125 |
| B4A           | 38             | snRNA           | 19  | ERVL        | 119 |
| MLT1J1        | 38             | rRNA            | 16  | MIR         | 105 |
| MIR           | 35             | Unknown         | 9   | Low_comple  | 100 |
| MIRb          | 35             | srpRNA          | 7   | MER1_type   | 71  |
| B3A           | 34             | tRNA            | 7   | L2          | 58  |
| AT_rich       | 32             | Other           | 5   | Satellite   | 48  |
| MLT1J2        | 30             | scrNA           | 4   | ERV1        | 40  |
| GSAT_MM       | 29             | .               | .   | ID          | 40  |
| (GA)n         | 26             | .               | .   | MER2_type   | 20  |
| B1_Mus1       | 24             | .               | .   | snRNA       | 19  |
| B1F           | 23             | .               | .   | rRNA        | 16  |
| PB1D10        | 22             | .               | .   | Unknown     | 9   |
| B2_Mm2        | 22             | .               | .   | srpRNA      | 7   |
| PB1           | 22             | .               | .   | tRNA        | 7   |
| MIRc          | 21             | .               | .   | AcHobo      | 6   |
| RLTR42        | 21             | .               | .   | CR1         | 6   |
| PB1D7         | 20             | .               | .   | Tip100      | 5   |
| (TC)n         | 20             | .               | .   | Other       | 5   |
| B4            | 20             | .               | .   | SINE        | 4   |
| ID4           | 20             | .               | .   | scrNA       | 4   |
| ORR1E         | 20             | .               | .   | RTE         | 3   |
| CT-rich       | 20             | .               | .   | Gypsy       | 3   |
| RLTR23        | 18             | .               | .   | Mariner     | 2   |
| L2b           | 18             | .               | .   | Tigger      | 2   |
| GA-rich       | 17             | .               | .   | Genie?      | 2   |
| L2            | 17             | .               | .   | DNA         | 1   |
| B1_Mus2       | 16             | .               | .   | Gypsy?      | 1   |
| RMER15        | 16             | .               | .   | TcMar       | 1   |
| Lx8           | 15             | .               | .   | centr       | 1   |
| L2a           | 15             | .               | .   | MER1_type?  | 1   |
| LTR33B        | 14             | .               | .   | .           | .   |
| B1_Mur2       | 13             | .               | .   | .           | .   |
| L1M5          | 13             | .               | .   | .           | .   |
| LSU-rRNA_H    | 13             | .               | .   | .           | .   |
| MTEa          | 13             | .               | .   | .           | .   |
| Lx9           | 13             | .               | .   | .           | .   |
| (A)n          | 13             | .               | .   | .           | .   |
| GC_rich       | 12             | .               | .   | .           | .   |
| B1_Mur4       | 12             | .               | .   | .           | .   |
| LTR33A        | 12             | .               | .   | .           | .   |
| B1_Mur1       | 12             | .               | .   | .           | .   |
| MTC           | 11             | .               | .   | .           | .   |
| MIR3          | 11             | .               | .   | .           | .   |
| ID4           | 11             | .               | .   | .           | .   |
| SYNREP_MM     | 11             | .               | .   | .           | .   |
| Lx7           | 10             | .               | .   | .           | .   |
| B2_Mm1a       | 10             | .               | .   | .           | .   |
| URR1A         | 9              | .               | .   | .           | .   |
| RMER10A       | 9              | .               | .   | .           | .   |
| (T)n          | 9              | .               | .   | .           | .   |
| (CAGA)n       | 8              | .               | .   | .           | .   |
| L1MB8         | 8              | .               | .   | .           | .   |
| PB1D9         | 8              | .               | .   | .           | .   |
| (CATT)n       | 8              | .               | .   | .           | .   |
| B1F1          | 8              | .               | .   | .           | .   |
| URR1B         | 8              | .               | .   | .           | .   |
| MER20         | 8              | .               | .   | .           | .   |
| L2c           | 8              | .               | .   | .           | .   |
| L1Md_F2       | 8              | .               | .   | .           | .   |
| L1M4          | 8              | .               | .   | .           | .   |
| U2            | 7              | .               | .   | .           | .   |
| ORR1C1        | 7              | .               | .   | .           | .   |
| MER5B         | 7              | .               | .   | .           | .   |
| 7SLRNA        | 7              | .               | .   | .           | .   |
| (CAAAA)n      | 7              | .               | .   | .           | .   |
| RLTR44-int    | 7              | .               | .   | .           | .   |
| MLT1A1        | 7              | .               | .   | .           | .   |
| MLT2F         | 7              | .               | .   | .           | .   |
| MTE2a         | 7              | .               | .   | .           | .   |
| MTD           | 7              | .               | .   | .           | .   |
| G-rich        | 7              | .               | .   | .           | .   |
| L1MC3         | 7              | .               | .   | .           | .   |
| L1ME1         | 6              | .               | .   | .           | .   |
| Tigger7       | 6              | .               | .   | .           | .   |
| MT2B          | 6              | .               | .   | .           | .   |
| B1_Mm         | 6              | .               | .   | .           | .   |
| U5            | 6              | .               | .   | .           | .   |
| ZP3AR         | 6              | .               | .   | .           | .   |
| ID            | 6              | .               | .   | .           | .   |
| Lx5           | 6              | .               | .   | .           | .   |
| MLT1N2        | 6              | .               | .   | .           | .   |
| RMER17C       | 6              | .               | .   | .           | .   |
| MER5A         | 5              | .               | .   | .           | .   |
| Tigger5       | 5              | .               | .   | .           | .   |
| ORR1B1        | 5              | .               | .   | .           | .   |





|       |           |           |       |           |           |           |             |                |
|-------|-----------|-----------|-------|-----------|-----------|-----------|-------------|----------------|
| chr1  | 179913083 | 179913484 | chr1  | 179913090 | 179913207 | RLTR5_Mm  | LTR         | ERV1           |
| chr1  | 182363860 | 182364261 | .     | .         | .         | .         | .           | .              |
| chr1  | 184002103 | 184002504 | .     | .         | .         | .         | .           | .              |
| chr1  | 184688892 | 184689293 | chr1  | 184689036 | 184689210 | MLT1J1    | LTR         | MaLR           |
| chr1  | 185729144 | 185729545 | .     | .         | .         | .         | .           | .              |
| chr1  | 185745108 | 185745509 | .     | .         | .         | .         | .           | .              |
| chr1  | 191540110 | 191540511 | chr1  | 191539949 | 191540167 | ID_B1     | SINE        | B4             |
| chr1  | 193098466 | 193098867 | chr1  | 193098572 | 193098706 | MLT1L     | LTR         | MaLR           |
| chr1  | 193098466 | 193098867 | chr1  | 193098726 | 193098764 | 5S        | rRNA        | rRNA           |
| chr1  | 194571407 | 194571808 | chr1  | 194571764 | 194571881 | U5        | snRNA       | snRNA          |
| chr1  | 197067725 | 197068126 | .     | .         | .         | .         | .           | .              |
| chr10 | 5315043   | 5315444   | .     | .         | .         | .         | .           | .              |
| chr10 | 5570670   | 5571071   | .     | .         | .         | .         | .           | .              |
| chr10 | 8112630   | 8113031   | chr10 | 8112989   | 8113195   | B3A       | SINE        | B2             |
| chr10 | 12594728  | 12595129  | .     | .         | .         | .         | .           | .              |
| chr10 | 13460321  | 13460722  | .     | .         | .         | .         | .           | .              |
| chr10 | 19130696  | 19131097  | chr10 | 19130835  | 19130911  | MLT1J     | LTR         | MaLR           |
| chr10 | 19130696  | 19131097  | chr10 | 19131008  | 19131146  | L2        | LINE        | L2             |
| chr10 | 19635029  | 19635430  | .     | .         | .         | .         | .           | .              |
| chr10 | 21308298  | 21308699  | chr10 | 21308431  | 21308520  | (GAATG)n  | Simple_repe | Simple_repeat  |
| chr10 | 21308298  | 21308699  | chr10 | 21308533  | 21308565  | (CA)n     | Simple_repe | Simple_repeat  |
| chr10 | 21308298  | 21308699  | chr10 | 21308565  | 21308631  | (GA)n     | Simple_repe | Simple_repeat  |
| chr10 | 21720305  | 21720706  | .     | .         | .         | .         | .           | .              |
| chr10 | 21862370  | 21862771  | chr10 | 21862398  | 21862535  | B1_Mus1   | SINE        | Alu            |
| chr10 | 21889287  | 21889688  | chr10 | 21889447  | 21889552  | Lx9       | LINE        | L1             |
| chr10 | 21889287  | 21889688  | chr10 | 21889564  | 21889685  | B1_Mur2   | SINE        | Alu            |
| chr10 | 22836551  | 22836952  | .     | .         | .         | .         | .           | .              |
| chr10 | 24485122  | 24485523  | .     | .         | .         | .         | .           | .              |
| chr10 | 24719607  | 24720008  | .     | .         | .         | .         | .           | .              |
| chr10 | 27832928  | 27833329  | .     | .         | .         | .         | .           | .              |
| chr10 | 36983386  | 36983787  | chr10 | 36983462  | 36983623  | (CATT)n   | Simple_repe | Simple_repeat  |
| chr10 | 36983386  | 36983787  | chr10 | 36983740  | 36983761  | AT_rich   | Low_comple  | Low_complexity |
| chr10 | 39932265  | 39932666  | chr10 | 39932624  | 39932646  | (CAGA)n   | Simple_repe | Simple_repeat  |
| chr10 | 41586033  | 41586434  | chr10 | 41585956  | 41586159  | ORR1C1    | LTR         | MaLR           |
| chr10 | 43172108  | 43172509  | .     | .         | .         | .         | .           | .              |
| chr10 | 43409688  | 43410089  | .     | .         | .         | .         | .           | .              |
| chr10 | 43958531  | 43958932  | .     | .         | .         | .         | .           | .              |
| chr10 | 52478390  | 52478791  | .     | .         | .         | .         | .           | .              |
| chr10 | 54382608  | 54383009  | .     | .         | .         | .         | .           | .              |
| chr10 | 56502120  | 56502521  | chr10 | 56501593  | 56502154  | L1_Mm     | LINE        | L1             |
| chr10 | 58332552  | 58332953  | chr10 | 58332616  | 58332816  | Tigger5   | DNA         | MER2_type      |
| chr10 | 58893685  | 58894086  | .     | .         | .         | .         | .           | .              |
| chr10 | 59372268  | 59372669  | chr10 | 59372648  | 59372768  | (GGGA)n   | Simple_repe | Simple_repeat  |
| chr10 | 59672125  | 59672526  | chr10 | 59672503  | 59672641  | MIRb      | SINE        | MIR            |
| chr10 | 60041288  | 60041689  | chr10 | 60041370  | 60041412  | (GA)n     | Simple_repe | Simple_repeat  |
| chr10 | 60041288  | 60041689  | chr10 | 60041428  | 60041668  | ZP3AR     | Satellite   | Satellite      |
| chr10 | 60279557  | 60279958  | .     | .         | .         | .         | .           | .              |
| chr10 | 60984950  | 60985351  | chr10 | 60984893  | 60985092  | L1Md_F3   | LINE        | L1             |
| chr10 | 60984950  | 60985351  | chr10 | 60985117  | 60985234  | PB1D9     | SINE        | Alu            |
| chr10 | 60984950  | 60985351  | chr10 | 60985251  | 60985470  | B3A       | SINE        | B2             |
| chr10 | 61018105  | 61018506  | chr10 | 61018336  | 61018454  | ID_B1     | SINE        | B4             |
| chr10 | 61099753  | 61100154  | chr10 | 61099684  | 61099792  | RMER6A    | LTR         | ERVK           |
| chr10 | 61099753  | 61100154  | chr10 | 61099906  | 61100209  | MLT1L     | LTR         | MaLR           |
| chr10 | 61222696  | 61223097  | chr10 | 61223026  | 61223390  | MTB_Mm    | LTR         | MaLR           |
| chr10 | 62585258  | 62585659  | chr10 | 62585259  | 62585310  | MER5B     | DNA         | MER1_type      |
| chr10 | 62606127  | 62606528  | chr10 | 62606107  | 62606258  | ID_B1     | SINE        | B4             |
| chr10 | 62606127  | 62606528  | chr10 | 62606259  | 62606538  | MLT1J     | LTR         | MaLR           |
| chr10 | 65817693  | 65818094  | chr10 | 65817583  | 65817891  | LTR16A    | LTR         | ERVl           |
| chr10 | 66327167  | 66327568  | .     | .         | .         | .         | .           | .              |
| chr10 | 66384136  | 66384537  | .     | .         | .         | .         | .           | .              |
| chr10 | 67073432  | 67073833  | chr10 | 67073639  | 67073731  | MIRm      | SINE        | MIR            |
| chr10 | 67073432  | 67073833  | chr10 | 67073811  | 67073871  | MIR       | SINE        | MIR            |
| chr10 | 67210149  | 67210550  | .     | .         | .         | .         | .           | .              |
| chr10 | 67929835  | 67930236  | .     | .         | .         | .         | .           | .              |
| chr10 | 68247565  | 68247966  | chr10 | 68247640  | 68247994  | RLTR15    | LTR         | ERVK           |
| chr10 | 69042263  | 69042664  | .     | .         | .         | .         | .           | .              |
| chr10 | 69351228  | 69351629  | .     | .         | .         | .         | .           | .              |
| chr10 | 69657782  | 69658183  | chr10 | 69657742  | 69657810  | (TC)n     | Simple_repe | Simple_repeat  |
| chr10 | 69657782  | 69658183  | chr10 | 69657810  | 69657838  | (CA)n     | Simple_repe | Simple_repeat  |
| chr10 | 69657782  | 69658183  | chr10 | 69657838  | 69658012  | 7SLRNA    | srpRNA      | srpRNA         |
| chr10 | 69657782  | 69658183  | chr10 | 69658177  | 69658333  | MT2B      | LTR         | ERVl           |
| chr10 | 70609282  | 70609683  | chr10 | 70609253  | 70609346  | PB1D10    | SINE        | Alu            |
| chr10 | 74715071  | 74715472  | .     | .         | .         | .         | .           | .              |
| chr10 | 75096495  | 75096896  | chr10 | 75096674  | 75096726  | MLT1J1    | LTR         | MaLR           |
| chr10 | 75096495  | 75096896  | chr10 | 75096796  | 75096825  | GC_rich   | Low_comple  | Low_complexity |
| chr10 | 75299963  | 75300364  | .     | .         | .         | .         | .           | .              |
| chr10 | 76365843  | 76366244  | chr10 | 76366060  | 76366084  | (CA)n     | Simple_repe | Simple_repeat  |
| chr10 | 76664663  | 76665064  | .     | .         | .         | .         | .           | .              |
| chr10 | 77745064  | 77745465  | .     | .         | .         | .         | .           | .              |
| chr10 | 77800939  | 77801340  | chr10 | 77801332  | 77801532  | B4        | SINE        | B4             |
| chr10 | 77933928  | 77934329  | .     | .         | .         | .         | .           | .              |
| chr10 | 79095772  | 79096173  | .     | .         | .         | .         | .           | .              |
| chr10 | 79124588  | 79124989  | chr10 | 79124852  | 79124892  | (CA)n     | Simple_repe | Simple_repeat  |
| chr10 | 79618750  | 79619151  | chr10 | 79618771  | 79618892  | PB1D10    | SINE        | Alu            |
| chr10 | 79624475  | 79624876  | chr10 | 79624818  | 79624891  | ID4       | SINE        | ID             |
| chr10 | 80461513  | 80461914  | chr10 | 80461466  | 80461530  | RSINE1    | SINE        | B4             |
| chr10 | 80461513  | 80461914  | chr10 | 80461530  | 80461556  | (TTTTA)n  | Simple_repe | Simple_repeat  |
| chr10 | 80461513  | 80461914  | chr10 | 80461619  | 80461641  | (T)n      | Simple_repe | Simple_repeat  |
| chr10 | 80499950  | 80500351  | .     | .         | .         | .         | .           | .              |
| chr10 | 80887489  | 80887890  | chr10 | 80887520  | 80887559  | GA-rich   | Low_comple  | Low_complexity |
| chr10 | 80887489  | 80887890  | chr10 | 80887846  | 80887866  | (CAGAGA)n | Simple_repe | Simple_repeat  |
| chr10 | 81014368  | 81014769  | .     | .         | .         | .         | .           | .              |
| chr10 | 81033621  | 81034022  | .     | .         | .         | .         | .           | .              |
| chr10 | 82615116  | 82615517  | .     | .         | .         | .         | .           | .              |
| chr10 | 82640742  | 82641143  | chr10 | 82641013  | 82641510  | MT2A      | LTR         | ERVl           |

|             |   |
|-------------|---|
| MERSA1      | 2 |
| (TCCC)n     | 2 |
| tRNA-Arg-AG | 2 |
| (C)n        | 2 |
| (CAGCC)n    | 2 |
| (TGGAn)     | 2 |
| MLT1H2      | 2 |
| L1_Mus3     | 2 |
| U6          | 2 |
| MamRep605   | 2 |
| MYSERV6-int | 2 |
| tRNA-Ala-GC | 2 |
| RCHARR1     | 2 |
| MLT2B1      | 2 |
| L1MD3       | 2 |
| (TATATG)n   | 2 |
| MER119      | 2 |
| L1_Mur3     | 2 |
| RMER6B      | 2 |
| Charlie1    | 2 |
| polyurine   | 2 |
| YREP_Mm     | 2 |
| LFsINE_Vert | 2 |
| (CTGGGG)n   | 2 |
| RLTR1B      | 2 |
| (CACTC)n    | 2 |
| ORR1C2      | 2 |
| Charlie9    | 2 |
| (CAG)n      | 2 |
| (TCCA)n     | 2 |
| MTA_Mm      | 2 |
| Zaphod      | 2 |
| RMER1C      | 2 |
| LTR88c      | 2 |
| L1ME3A      | 2 |
| RLTR18      | 2 |
| RLTR12B     | 2 |
| ORR1A2      | 2 |
| IAPLTR1_Mm  | 2 |
| (TTA)n      | 2 |
| L1M3        | 2 |
| L3          | 2 |
| MLT1        | 2 |
| LTR78       | 2 |
| RMER20B     | 2 |
| (CCAA)n     | 2 |
| ERVl-int    | 2 |
| L1_Rod      | 2 |
| (TTTTG)n    | 2 |
| MamGyplTR   | 2 |
| RMER5       | 2 |
| (CCG)n      | 2 |
| RLTR6-int   | 2 |
| L1_Mus4     | 2 |
| (TAAA)n     | 1 |
| MER31B      | 1 |
| MER117      | 1 |
| MER44B      | 1 |
| A-rich      | 1 |
| (CAAAA)n    | 1 |
| RLTR19B     | 1 |
| MER34A1     | 1 |
| MER103      | 1 |
| (TGGGGG)n   | 1 |
| (CTATT)n    | 1 |
| RLTR5_Mm    | 1 |
| (TTTTA)n    | 1 |
| LTR48B      | 1 |
| L1MEg       | 1 |
| (GGA)n      | 1 |
| L1MEe       | 1 |
| U8          | 1 |
| MLT1D-int   | 1 |
| tRNA-Cys-TG | 1 |
| (CAGC)n     | 1 |
| (TAGG)n     | 1 |
| Arthur1B    | 1 |
| ORR1A4      | 1 |
| Charlie1a   | 1 |
| RLTR19      | 1 |
| (TGG)n      | 1 |
| MLT1E3      | 1 |
| L1MC5       | 1 |
| LTR16B1     | 1 |
| LTR37A      | 1 |
| (AATAG)n    | 1 |
| (GAGAA)n    | 1 |
| (TTTTC)n    | 1 |
| RLTR20A2    | 1 |
| Charlie2b   | 1 |
| Lx2         | 1 |
| RLTR20B3    | 1 |
| LTR88b      | 1 |
| (CGGAA)n    | 1 |
| MER94       | 1 |

|       |           |           |       |           |           |            |             |               |   |   |   |
|-------|-----------|-----------|-------|-----------|-----------|------------|-------------|---------------|---|---|---|
| chr10 | 82816938  | 82817339  | .     | .         | .         | .          | .           | .             | . | . | . |
| chr10 | 83859949  | 83860350  | .     | .         | .         | .          | .           | .             | . | . | . |
| chr10 | 85562908  | 85563309  | .     | .         | .         | .          | .           | .             | . | . | . |
| chr10 | 85566841  | 85567242  | .     | .         | .         | .          | .           | .             | . | . | . |
| chr10 | 85733451  | 85733852  | .     | .         | .         | .          | .           | .             | . | . | . |
| chr10 | 85839081  | 85839482  | chr10 | 85839217  | 85839383  | MLT1J2     | LTR         | MaLR          | . | . | . |
| chr10 | 85839081  | 85839482  | chr10 | 85839382  | 85839496  | B4A        | SINE        | B4            | . | . | . |
| chr10 | 88921549  | 88921950  | chr10 | 88921807  | 88921913  | B1F1       | SINE        | Alu           | . | . | . |
| chr10 | 88921549  | 88921950  | chr10 | 88921919  | 88922394  | Lx9        | LINE        | L1            | . | . | . |
| chr10 | 90427652  | 90428053  | chr10 | 90428029  | 90428096  | ID         | SINE        | ID            | . | . | . |
| chr10 | 90621241  | 90621642  | .     | .         | .         | .          | .           | .             | . | . | . |
| chr10 | 90650952  | 90651353  | chr10 | 90650983  | 90651029  | (CAA)n     | Simple_repe | Simple_repeat | . | . | . |
| chr10 | 90650952  | 90651353  | chr10 | 90651252  | 90651398  | B1_Mur4    | SINE        | Alu           | . | . | . |
| chr10 | 92601462  | 92601863  | chr10 | 92601714  | 92601772  | (CA)n      | Simple_repe | Simple_repeat | . | . | . |
| chr10 | 92866189  | 92866590  | chr10 | 92866169  | 92866489  | RLTR15     | LTR         | ERVK          | . | . | . |
| chr10 | 92866189  | 92866590  | chr10 | 92866489  | 92866604  | Tigger5    | DNA         | MER2_type     | . | . | . |
| chr10 | 92884731  | 92885132  | chr10 | 92884516  | 92884737  | B3         | SINE        | B2            | . | . | . |
| chr10 | 92884731  | 92885132  | chr10 | 92884743  | 92885066  | L1MA8      | LINE        | L1            | . | . | . |
| chr10 | 92884731  | 92885132  | chr10 | 92885077  | 92885257  | B3         | SINE        | B2            | . | . | . |
| chr10 | 94628689  | 94629090  | .     | .         | .         | .          | .           | .             | . | . | . |
| chr10 | 94849170  | 94849571  | chr10 | 94849006  | 94849281  | B4A        | SINE        | B4            | . | . | . |
| chr10 | 94849170  | 94849571  | chr10 | 94849281  | 94849401  | MLT1J      | LTR         | MaLR          | . | . | . |
| chr10 | 94849170  | 94849571  | chr10 | 94849425  | 94849756  | MTEa       | LTR         | MaLR          | . | . | . |
| chr10 | 94971297  | 94971698  | chr10 | 94971306  | 94971388  | URR1B      | DNA         | MER1_type     | . | . | . |
| chr10 | 95690075  | 95690476  | .     | .         | .         | .          | .           | .             | . | . | . |
| chr10 | 96090814  | 96091215  | .     | .         | .         | .          | .           | .             | . | . | . |
| chr10 | 97971237  | 97971638  | .     | .         | .         | .          | .           | .             | . | . | . |
| chr10 | 98544199  | 98544600  | chr10 | 98544389  | 98544453  | ERVL-E-int | LTR         | ERVL          | . | . | . |
| chr10 | 109646747 | 109647148 | chr10 | 109646878 | 109647072 | B3         | SINE        | B2            | . | . | . |
| chr10 | 109646747 | 109647148 | chr10 | 109647076 | 109647295 | Lx         | LINE        | L1            | . | . | . |
| chr10 | 110564492 | 110564893 | chr10 | 110564616 | 110564789 | MIR        | SINE        | MIR           | . | . | . |
| chr10 | 110953885 | 110954286 | .     | .         | .         | .          | .           | .             | . | . | . |
| chr10 | 111007753 | 111008154 | .     | .         | .         | .          | .           | .             | . | . | . |
| chr10 | 115201126 | 115201527 | chr10 | 115201320 | 115201466 | B1_Mus2    | SINE        | Alu           | . | . | . |
| chr10 | 116170368 | 116170769 | .     | .         | .         | .          | .           | .             | . | . | . |
| chr10 | 116187881 | 116188282 | chr10 | 116187856 | 116187889 | (T)n       | Simple_repe | Simple_repeat | . | . | . |
| chr10 | 116433326 | 116433727 | .     | .         | .         | .          | .           | .             | . | . | . |
| chr10 | 117154603 | 117155004 | chr10 | 117154459 | 117154638 | B2_Mm2     | SINE        | B2            | . | . | . |
| chr10 | 117421851 | 117422252 | .     | .         | .         | .          | .           | .             | . | . | . |
| chr10 | 117567061 | 117567462 | chr10 | 117567207 | 117567353 | MLT2E      | LTR         | ERVL          | . | . | . |
| chr10 | 118842653 | 118843054 | .     | .         | .         | .          | .           | .             | . | . | . |
| chr10 | 119100955 | 119101356 | chr10 | 119101038 | 119101135 | ID_B1      | SINE        | B4            | . | . | . |
| chr10 | 119100955 | 119101356 | chr10 | 119101171 | 119101277 | ID_B1      | SINE        | B4            | . | . | . |
| chr10 | 120053541 | 120053942 | .     | .         | .         | .          | .           | .             | . | . | . |
| chr10 | 120073184 | 120073585 | .     | .         | .         | .          | .           | .             | . | . | . |
| chr10 | 121382434 | 121382835 | .     | .         | .         | .          | .           | .             | . | . | . |
| chr10 | 121475603 | 121476004 | chr10 | 121475790 | 121475837 | MLT1J      | LTR         | MaLR          | . | . | . |
| chr10 | 122252070 | 122252471 | .     | .         | .         | .          | .           | .             | . | . | . |
| chr10 | 122350467 | 122350868 | .     | .         | .         | .          | .           | .             | . | . | . |
| chr10 | 126342844 | 126343245 | .     | .         | .         | .          | .           | .             | . | . | . |
| chr10 | 126365644 | 126366045 | .     | .         | .         | .          | .           | .             | . | . | . |
| chr10 | 127068319 | 127068720 | chr10 | 127068291 | 127068361 | ID4        | SINE        | ID            | . | . | . |
| chr10 | 127068319 | 127068720 | chr10 | 127068379 | 127068706 | ORR1D1     | LTR         | MaLR          | . | . | . |
| chr10 | 127926505 | 127926906 | .     | .         | .         | .          | .           | .             | . | . | . |
| chr11 | 3000267   | 3000668   | chr11 | 3000013   | 3002238   | GSAT_MM    | Satellite   | Satellite     | . | . | . |
| chr11 | 3718340   | 3718741   | chr11 | 3718533   | 3718759   | RLTR42     | LTR         | ERVK          | . | . | . |
| chr11 | 4082080   | 4082481   | .     | .         | .         | .          | .           | .             | . | . | . |
| chr11 | 7137803   | 7138204   | .     | .         | .         | .          | .           | .             | . | . | . |
| chr11 | 11972294  | 11972695  | .     | .         | .         | .          | .           | .             | . | . | . |
| chr11 | 16446400  | 16446801  | .     | .         | .         | .          | .           | .             | . | . | . |
| chr11 | 16491518  | 16491919  | .     | .         | .         | .          | .           | .             | . | . | . |
| chr11 | 20369369  | 20369770  | .     | .         | .         | .          | .           | .             | . | . | . |
| chr11 | 20377529  | 20377930  | .     | .         | .         | .          | .           | .             | . | . | . |
| chr11 | 20508359  | 20508760  | .     | .         | .         | .          | .           | .             | . | . | . |
| chr11 | 20796331  | 20796732  | .     | .         | .         | .          | .           | .             | . | . | . |
| chr11 | 22381984  | 22382385  | chr11 | 22382014  | 22382133  | LTR48B     | LTR         | ERV1          | . | . | . |
| chr11 | 22381984  | 22382385  | chr11 | 22382145  | 22382270  | RLTR42     | LTR         | ERVK          | . | . | . |
| chr11 | 22381984  | 22382385  | chr11 | 22382270  | 22382292  | (CAAAA)n   | Simple_repe | Simple_repeat | . | . | . |
| chr11 | 22381984  | 22382385  | chr11 | 22382292  | 22382374  | RLTR42     | LTR         | ERVK          | . | . | . |
| chr11 | 22593425  | 22593826  | .     | .         | .         | .          | .           | .             | . | . | . |
| chr11 | 22619736  | 22620137  | .     | .         | .         | .          | .           | .             | . | . | . |
| chr11 | 24999973  | 25000374  | chr11 | 25000022  | 25000201  | (CATT)n    | Simple_repe | Simple_repeat | . | . | . |
| chr11 | 28806245  | 28806646  | .     | .         | .         | .          | .           | .             | . | . | . |
| chr11 | 29579989  | 29580390  | chr11 | 29579859  | 29580268  | RLTR23     | LTR         | ERV1          | . | . | . |
| chr11 | 29579989  | 29580390  | chr11 | 29580268  | 29580400  | Lx9        | LINE        | L1            | . | . | . |
| chr11 | 29784283  | 29784684  | chr11 | 29784455  | 29784761  | L1M5       | LINE        | L1            | . | . | . |
| chr11 | 31535618  | 31536019  | chr11 | 31535674  | 31535763  | RLTR42     | LTR         | ERVK          | . | . | . |
| chr11 | 31535618  | 31536019  | chr11 | 31535683  | 31535847  | MLT1J1     | LTR         | MaLR          | . | . | . |
| chr11 | 31535618  | 31536019  | chr11 | 31535802  | 31535861  | RLTR42     | LTR         | ERVK          | . | . | . |
| chr11 | 31535618  | 31536019  | chr11 | 31535925  | 31536126  | MER115     | DNA         | Tip100        | . | . | . |
| chr11 | 31576695  | 31577096  | chr11 | 31576890  | 31577011  | MLT1J      | LTR         | MaLR          | . | . | . |
| chr11 | 31707370  | 31707771  | chr11 | 31707087  | 31707381  | MER2       | DNA         | MER2_type     | . | . | . |
| chr11 | 32304686  | 32305087  | chr11 | 32305066  | 32305525  | MER21B     | LTR         | ERV1          | . | . | . |
| chr11 | 32662863  | 32663264  | chr11 | 32662778  | 32662949  | MIRb       | SINE        | MIR           | . | . | . |
| chr11 | 32662863  | 32663264  | chr11 | 32663029  | 32663454  | ORR1B1     | LTR         | MaLR          | . | . | . |
| chr11 | 33998519  | 33998920  | .     | .         | .         | .          | .           | .             | . | . | . |
| chr11 | 34444641  | 34445042  | chr11 | 34444489  | 34444700  | RLTR44-int | LTR         | ERVK          | . | . | . |
| chr11 | 34444641  | 34445042  | chr11 | 34444710  | 34444923  | RLTR44-int | LTR         | ERVK          | . | . | . |
| chr11 | 34444641  | 34445042  | chr11 | 34444926  | 34445121  | RLTR44-int | LTR         | ERVK          | . | . | . |
| chr11 | 34495214  | 34495615  | chr11 | 34495124  | 34495331  | RLTR44-int | LTR         | ERVK          | . | . | . |
| chr11 | 34495214  | 34495615  | chr11 | 34495306  | 34495523  | RLTR44-int | LTR         | ERVK          | . | . | . |
| chr11 | 34495214  | 34495615  | chr11 | 34495523  | 34495577  | RLTR44-int | LTR         | ERVK          | . | . | . |
| chr11 | 34495214  | 34495615  | chr11 | 34495578  | 34495794  | RLTR44-int | LTR         | ERVK          | . | . | . |
| chr11 | 34879384  | 34879785  | .     | .         | .         | .          | .           | .             | . | . | . |
| chr11 | 34928083  | 34928484  | chr11 | 34928205  | 34928349  | MLT1J2     | LTR         | MaLR          | . | . | . |

|              |   |
|--------------|---|
| L1Mca        | 1 |
| (GGAGA)n     | 1 |
| Charlie21a   | 1 |
| (TGAA)n      | 1 |
| RMER4A       | 1 |
| Tigger16a    | 1 |
| LTR31        | 1 |
| LTR83        | 1 |
| Tigger15a    | 1 |
| MTB          | 1 |
| LTR79        | 1 |
| MT2_Mm       | 1 |
| MER77        | 1 |
| (CAT)n       | 1 |
| LTR40b       | 1 |
| MER63B       | 1 |
| (ACTG)n      | 1 |
| MLT1H2-int   | 1 |
| LTR40a       | 1 |
| (TTCA)n      | 1 |
| L1MEF        | 1 |
| RMER6D       | 1 |
| RLTR16       | 1 |
| (CTG)n       | 1 |
| ERVL-B4-int  | 1 |
| HAL1-3A_ME   | 1 |
| RLTR40       | 1 |
| L1Md_T       | 1 |
| polypyrimidi | 1 |
| MLT2B3       | 1 |
| Charlie5     | 1 |
| RLTR19A      | 1 |
| (AGGGGG)n    | 1 |
| MURVY-LTR    | 1 |
| (CGT)n       | 1 |
| L1ME2        | 1 |
| MER44D       | 1 |
| LTR50        | 1 |
| MYSERV16_I   | 1 |
| LTR16A1      | 1 |
| LTR16C       | 1 |
| L1ME3        | 1 |
| (ATG)n       | 1 |
| trNA-Tyr-TA  | 1 |
| MER2B        | 1 |
| L1MD         | 1 |
| MLT2C1       | 1 |
| RLTR13D5     | 1 |
| MER72        | 1 |
| ORR1B2       | 1 |
| MLT1A        | 1 |
| (TTAGGG)n    | 1 |
| RMER6C       | 1 |
| CENSAT_MC    | 1 |
| Tigger6b     | 1 |
| (CAGGG)n     | 1 |
| (CAGG)n      | 1 |
| MER33        | 1 |
| L1MC2        | 1 |
| MurERV4-int  | 1 |
| (GAAAA)n     | 1 |
| FLAM_A       | 1 |
| CR1_Mam      | 1 |
| RMER12       | 1 |
| (TTCTC)n     | 1 |
| (CATG)n      | 1 |
| MTE-int      | 1 |
| RLTR10-int   | 1 |
| (CATCC)n     | 1 |
| BLACKJACK    | 1 |
| Tigger16b    | 1 |
| MamGypLTR    | 1 |
| RLTR20A      | 1 |
| MER97c       | 1 |
| (TCCG)n      | 1 |
| (TCTCTC)n    | 1 |
| RMER13A      | 1 |
| L1MDb        | 1 |
| U4           | 1 |
| LTR16E2      | 1 |
| (CGG)n       | 1 |
| (CGCGG)n     | 1 |
| MER46C       | 1 |
| (CCCGG)n     | 1 |
| RLTR18B      | 1 |
| (TAGA)n      | 1 |
| SSU-rRNA_H   | 1 |
| L1Mcc        | 1 |
| HY3          | 1 |
| HY1          | 1 |
| MTE2b-int    | 1 |
| (GGCTG)n     | 1 |
| RLTR28B      | 1 |
| Charlie17a   | 1 |
| MLT1J1-int   | 1 |

|       |          |          |       |          |          |           |             |                |
|-------|----------|----------|-------|----------|----------|-----------|-------------|----------------|
| chr11 | 34928083 | 34928484 | chr11 | 34928364 | 34928425 | MIR       | SINE        | MIR            |
| chr11 | 34980841 | 34981242 | .     | .        | .        | .         | .           | .              |
| chr11 | 35063533 | 35063934 | chr11 | 35063590 | 35063702 | MLT1A1    | LTR         | MaLR           |
| chr11 | 35192889 | 35193290 | chr11 | 35193043 | 35193162 | MLT1J1    | LTR         | MaLR           |
| chr11 | 35192889 | 35193290 | chr11 | 35193183 | 35193330 | MER58B    | DNA         | MER1_type      |
| chr11 | 35287325 | 35287726 | .     | .        | .        | .         | .           | .              |
| chr11 | 35651230 | 35651631 | chr11 | 35651323 | 35651428 | B3A       | SINE        | B2             |
| chr11 | 35651230 | 35651631 | chr11 | 35651436 | 35651633 | B3        | SINE        | B2             |
| chr11 | 40260504 | 40260905 | chr11 | 40260635 | 40260678 | (TG)n     | Simple_repe | Simple_repeat  |
| chr11 | 41445950 | 41446351 | chr11 | 41445779 | 41446070 | (CATATA)n | Simple_repe | Simple_repeat  |
| chr11 | 41445950 | 41446351 | chr11 | 41446107 | 41446276 | (CA)n     | Simple_repe | Simple_repeat  |
| chr11 | 45609159 | 45609560 | .     | .        | .        | .         | .           | .              |
| chr11 | 45697027 | 45697428 | .     | .        | .        | .         | .           | .              |
| chr11 | 45886396 | 45886797 | chr11 | 45886430 | 45886616 | MER121    | Unknown     | Unknown        |
| chr11 | 49311170 | 49311571 | chr11 | 49311322 | 49311392 | ID4_      | SINE        | ID             |
| chr11 | 49624765 | 49625166 | .     | .        | .        | .         | .           | .              |
| chr11 | 49802877 | 49803278 | .     | .        | .        | .         | .           | .              |
| chr11 | 50065692 | 50066093 | chr11 | 50065570 | 50065981 | RLTR23    | LTR         | ERV1           |
| chr11 | 50487927 | 50488328 | .     | .        | .        | .         | .           | .              |
| chr11 | 51033743 | 51034144 | chr11 | 51033723 | 51034017 | RLTR15    | LTR         | ERVK           |
| chr11 | 51033743 | 51034144 | chr11 | 51034099 | 51034232 | B1_Mur2   | SINE        | Alu            |
| chr11 | 51429079 | 51429480 | .     | .        | .        | .         | .           | .              |
| chr11 | 51618651 | 51619052 | chr11 | 51618464 | 51618659 | B2_Mm2    | SINE        | B2             |
| chr11 | 51618651 | 51619052 | chr11 | 51618710 | 51618762 | B3A       | SINE        | B2             |
| chr11 | 51618651 | 51619052 | chr11 | 51618815 | 51619077 | RLTR42    | LTR         | ERVK           |
| chr11 | 51729191 | 51729592 | .     | .        | .        | .         | .           | .              |
| chr11 | 51753962 | 51754363 | .     | .        | .        | .         | .           | .              |
| chr11 | 51885268 | 51885669 | chr11 | 51885279 | 51885469 | RMER4B    | LTR         | ERVK           |
| chr11 | 52382318 | 52382719 | chr11 | 52382265 | 52382374 | MIRb      | SINE        | MIR            |
| chr11 | 52382318 | 52382719 | chr11 | 52382436 | 52382577 | LTR33A    | LTR         | ERVL           |
| chr11 | 52539505 | 52539906 | chr11 | 52539640 | 52539834 | B3        | SINE        | B2             |
| chr11 | 53122438 | 53122839 | chr11 | 53122435 | 53122468 | (CAGAGA)n | Simple_repe | Simple_repeat  |
| chr11 | 53610294 | 53610695 | .     | .        | .        | .         | .           | .              |
| chr11 | 53617042 | 53617443 | chr11 | 53617043 | 53617097 | MER5B     | DNA         | MER1_type      |
| chr11 | 53617042 | 53617443 | chr11 | 53617107 | 53617308 | ID_B1     | SINE        | B4             |
| chr11 | 53617042 | 53617443 | chr11 | 53617359 | 53617552 | L1M5      | LINE        | L1             |
| chr11 | 53875369 | 53875770 | .     | .        | .        | .         | .           | .              |
| chr11 | 53953436 | 53953837 | chr11 | 53953418 | 53953526 | L1MEg     | LINE        | L1             |
| chr11 | 53953436 | 53953837 | chr11 | 53953644 | 53953820 | B2_Mm1t   | SINE        | B2             |
| chr11 | 53953436 | 53953837 | chr11 | 53953822 | 53953880 | (GGA)n    | Simple_repe | Simple_repeat  |
| chr11 | 54037674 | 54038075 | chr11 | 54037752 | 54037961 | MIRc      | SINE        | MIR            |
| chr11 | 56904696 | 56905097 | .     | .        | .        | .         | .           | .              |
| chr11 | 58148286 | 58148687 | .     | .        | .        | .         | .           | .              |
| chr11 | 59272464 | 59272865 | .     | .        | .        | .         | .           | .              |
| chr11 | 59859854 | 59860255 | .     | .        | .        | .         | .           | .              |
| chr11 | 59928654 | 59929055 | chr11 | 59928786 | 59928814 | (CGGGG)n  | Simple_repe | Simple_repeat  |
| chr11 | 60904653 | 60905054 | .     | .        | .        | .         | .           | .              |
| chr11 | 61410876 | 61411277 | chr11 | 61410962 | 61410987 | AmsSINE1  | SINE        | SINE           |
| chr11 | 61410876 | 61411277 | chr11 | 61410987 | 61411027 | 5S        | rRNA        | rRNA           |
| chr11 | 61770037 | 61770438 | chr11 | 61769911 | 61770046 | B1_Mur4   | SINE        | Alu            |
| chr11 | 61819025 | 61819426 | .     | .        | .        | .         | .           | .              |
| chr11 | 61836579 | 61836980 | .     | .        | .        | .         | .           | .              |
| chr11 | 61840687 | 61841088 | .     | .        | .        | .         | .           | .              |
| chr11 | 62057328 | 62057729 | .     | .        | .        | .         | .           | .              |
| chr11 | 62544890 | 62545291 | .     | .        | .        | .         | .           | .              |
| chr11 | 62780094 | 62780495 | .     | .        | .        | .         | .           | .              |
| chr11 | 67328891 | 67329292 | .     | .        | .        | .         | .           | .              |
| chr11 | 67340214 | 67340615 | chr11 | 67340506 | 67340540 | (CAGA)n   | Simple_repe | Simple_repeat  |
| chr11 | 67371306 | 67371707 | chr11 | 67371132 | 67371342 | L1MEe     | LINE        | L1             |
| chr11 | 68413754 | 68414155 | chr11 | 68413608 | 68414005 | MLT2F     | LTR         | ERVL           |
| chr11 | 68886600 | 68887001 | chr11 | 68886927 | 68887064 | U8        | snRNA       | snRNA          |
| chr11 | 69142015 | 69142416 | .     | .        | .        | .         | .           | .              |
| chr11 | 69148286 | 69148687 | chr11 | 69148143 | 69148350 | MARNA     | DNA         | Mariner        |
| chr11 | 69148286 | 69148687 | chr11 | 69148685 | 69148765 | ORR1E     | LTR         | MaLR           |
| chr11 | 69230981 | 69231382 | .     | .        | .        | .         | .           | .              |
| chr11 | 69256893 | 69257294 | chr11 | 69256858 | 69256918 | (CA)n     | Simple_repe | Simple_repeat  |
| chr11 | 69256893 | 69257294 | chr11 | 69256918 | 69256964 | B1F2      | SINE        | Alu            |
| chr11 | 69441749 | 69442150 | chr11 | 69441936 | 69442278 | MER21B    | LTR         | ERV1           |
| chr11 | 69523295 | 69523696 | chr11 | 69523647 | 69523792 | RSINE1    | SINE        | B4             |
| chr11 | 69834190 | 69834591 | .     | .        | .        | .         | .           | .              |
| chr11 | 71897301 | 71897702 | chr11 | 71897580 | 71897693 | L1MC      | LINE        | L1             |
| chr11 | 72661793 | 72662194 | .     | .        | .        | .         | .           | .              |
| chr11 | 73094810 | 73095211 | .     | .        | .        | .         | .           | .              |
| chr11 | 74661322 | 74661723 | .     | .        | .        | .         | .           | .              |
| chr11 | 74868000 | 74868401 | chr11 | 74868375 | 74868509 | ID_B1     | SINE        | B4             |
| chr11 | 75333327 | 75333728 | chr11 | 75333214 | 75333360 | B1_Mus1   | SINE        | Alu            |
| chr11 | 75333327 | 75333728 | chr11 | 75333594 | 75333660 | MIR3      | SINE        | MIR            |
| chr11 | 75377735 | 75378136 | .     | .        | .        | .         | .           | .              |
| chr11 | 76098970 | 76099371 | chr11 | 76099290 | 76099362 | ID        | SINE        | ID             |
| chr11 | 76308796 | 76309197 | .     | .        | .        | .         | .           | .              |
| chr11 | 76400968 | 76401369 | .     | .        | .        | .         | .           | .              |
| chr11 | 76427770 | 76428171 | chr11 | 76427890 | 76427969 | ID4_      | SINE        | ID             |
| chr11 | 76427770 | 76428171 | chr11 | 76428059 | 76428220 | MIRb      | SINE        | MIR            |
| chr11 | 76998367 | 76998768 | chr11 | 76998477 | 76998636 | MER58B    | DNA         | MER1_type      |
| chr11 | 77599255 | 77599656 | .     | .        | .        | .         | .           | .              |
| chr11 | 78011377 | 78011778 | chr11 | 78011323 | 78011424 | PB1D9     | SINE        | Alu            |
| chr11 | 78011377 | 78011778 | chr11 | 78011538 | 78011687 | B1_Mus1   | SINE        | Alu            |
| chr11 | 78011377 | 78011778 | chr11 | 78011693 | 78011733 | (CAAAA)n  | Simple_repe | Simple_repeat  |
| chr11 | 78011377 | 78011778 | chr11 | 78011742 | 78011877 | B1_Mus1   | SINE        | Alu            |
| chr11 | 78160892 | 78161293 | .     | .        | .        | .         | .           | .              |
| chr11 | 78609139 | 78609540 | chr11 | 78608947 | 78609154 | B4A       | SINE        | B4             |
| chr11 | 78609139 | 78609540 | chr11 | 78609336 | 78609466 | MLT1J     | LTR         | MaLR           |
| chr11 | 78609139 | 78609540 | chr11 | 78609507 | 78609539 | AT_rich   | Low_comple  | Low_complexity |
| chr11 | 78884968 | 78885369 | .     | .        | .        | .         | .           | .              |
| chr11 | 79001688 | 79002089 | .     | .        | .        | .         | .           | .              |

|              |   |
|--------------|---|
| (TTCC)n      | 1 |
| L1MA4A       | 1 |
| 4.5SRNA      | 1 |
| ETnERV2-int  | 1 |
| Lx2B         | 1 |
| (CACCC)n     | 1 |
| (TTG)n       | 1 |
| tRNA-SeC(e)- | 1 |
| (CCGAA)n     | 1 |
| RLTR25B      | 1 |
| RMER2        | 1 |
| RMER13B      | 1 |
| L1Md_F       | 1 |
| L1M6         | 1 |
| BCI_Mm       | 1 |
| LTR41B       | 1 |
| L1MA4        | 1 |
| (GGGAGA)n    | 1 |
| MTEb-int     | 1 |
| RLTR1        | 1 |
| MMSAT4       | 1 |
| RLTR30       | 1 |
| MTEa-int     | 1 |
| (TCCCC)n     | 1 |
| (TCTA)n      | 1 |
| RLTR20D      | 1 |

|       |           |           |       |           |           |             |                           |
|-------|-----------|-----------|-------|-----------|-----------|-------------|---------------------------|
| chr11 | 79009993  | 79010394  | chr11 | 79010004  | 79010070  | (TG)n       | Simple_repe:Simple_repeat |
| chr11 | 79009993  | 79010394  | chr11 | 79010073  | 79010219  | B3          | SINE B2                   |
| chr11 | 79118833  | 79119234  | chr11 | 79118882  | 79119061  | MLT1F       | LTR MaLR                  |
| chr11 | 79226707  | 79227108  | .     | .         | .         | .           | .                         |
| chr11 | 79552578  | 79552979  | .     | .         | .         | .           | .                         |
| chr11 | 80442912  | 80443313  | chr11 | 80442921  | 80443174  | Charlie25   | DNA MER1_type             |
| chr11 | 80442912  | 80443313  | chr11 | 80443197  | 80443301  | MIR         | SINE MIR                  |
| chr11 | 81820422  | 81820823  | .     | .         | .         | .           | .                         |
| chr11 | 81825262  | 81825663  | .     | .         | .         | .           | .                         |
| chr11 | 81845678  | 81846079  | .     | .         | .         | .           | .                         |
| chr11 | 81852722  | 81853123  | chr11 | 81852886  | 81853015  | MLT1D-int   | LTR MaLR                  |
| chr11 | 81852722  | 81853123  | chr11 | 81853025  | 81853102  | MLT1D       | LTR MaLR                  |
| chr11 | 81880557  | 81880958  | chr11 | 81880270  | 81880655  | ERVL-E-int  | LTR ERVL                  |
| chr11 | 81952970  | 81953371  | .     | .         | .         | .           | .                         |
| chr11 | 82425574  | 82425975  | chr11 | 82425458  | 82425634  | MER20       | DNA MER1_type             |
| chr11 | 83084652  | 83085053  | chr11 | 83084999  | 83085186  | U2          | snRNA snRNA               |
| chr11 | 83377288  | 83377689  | .     | .         | .         | .           | .                         |
| chr11 | 83542552  | 83542953  | .     | .         | .         | .           | .                         |
| chr11 | 85417158  | 85417559  | chr11 | 85417068  | 85417165  | L1M5        | LINE L1                   |
| chr11 | 85599836  | 85600237  | chr11 | 85600152  | 85600267  | B1F         | SINE Alu                  |
| chr11 | 86195089  | 86195490  | .     | .         | .         | .           | .                         |
| chr11 | 86733819  | 86734220  | .     | .         | .         | .           | .                         |
| chr11 | 87236023  | 87236424  | chr11 | 87236368  | 87236533  | U1          | snRNA snRNA               |
| chr11 | 87256998  | 87257399  | chr11 | 87257262  | 87257449  | B2_Mm1a     | SINE B2                   |
| chr11 | 87262363  | 87262764  | .     | .         | .         | .           | .                         |
| chr11 | 87994807  | 87995208  | chr11 | 87995187  | 87995438  | (TG)n       | Simple_repe:Simple_repeat |
| chr11 | 88064101  | 88064502  | chr11 | 88064307  | 88064438  | L2a         | LINE L2                   |
| chr11 | 88064101  | 88064502  | chr11 | 88064443  | 88064623  | ID_B1       | SINE B4                   |
| chr11 | 88899949  | 88900350  | .     | .         | .         | .           | .                         |
| chr11 | 89846723  | 89847124  | .     | .         | .         | .           | .                         |
| chr11 | 90086185  | 90086586  | .     | .         | .         | .           | .                         |
| chr11 | 93672966  | 93673367  | chr11 | 93672887  | 93673064  | L1M5        | LINE L1                   |
| chr11 | 93672966  | 93673367  | chr11 | 93673092  | 93673216  | MLT1J2      | LTR MaLR                  |
| chr11 | 93770152  | 93770553  | .     | .         | .         | .           | .                         |
| chr11 | 94002841  | 94003242  | chr11 | 94003025  | 94003191  | L2a         | LINE L2                   |
| chr11 | 94002841  | 94003242  | chr11 | 94003233  | 94003277  | (GAAA)n     | Simple_repe:Simple_repeat |
| chr11 | 94021691  | 94022092  | .     | .         | .         | .           | .                         |
| chr11 | 94138206  | 94138607  | .     | .         | .         | .           | .                         |
| chr11 | 94197808  | 94198209  | chr11 | 94197862  | 94198055  | B3          | SINE B2                   |
| chr11 | 94197808  | 94198209  | chr11 | 94198055  | 94198390  | L1MC4       | LINE L1                   |
| chr11 | 94580609  | 94581010  | chr11 | 94580936  | 94581191  | B4A         | SINE B4                   |
| chr11 | 94789324  | 94789725  | .     | .         | .         | .           | .                         |
| chr11 | 95265138  | 95265539  | chr11 | 95264989  | 95265242  | L2          | LINE L2                   |
| chr11 | 95368348  | 95368749  | .     | .         | .         | .           | .                         |
| chr11 | 95640690  | 95641091  | chr11 | 95640733  | 95640799  | B1_Mus1     | SINE Alu                  |
| chr11 | 95640690  | 95641091  | chr11 | 95640801  | 95641005  | URR1A       | DNA MER1_type             |
| chr11 | 95640690  | 95641091  | chr11 | 95641007  | 95641072  | B1_Mur2     | SINE Alu                  |
| chr11 | 95879373  | 95879774  | .     | .         | .         | .           | .                         |
| chr11 | 96121711  | 96122112  | .     | .         | .         | .           | .                         |
| chr11 | 96244840  | 96245241  | chr11 | 96244892  | 96244992  | B3          | SINE B2                   |
| chr11 | 96341983  | 96342384  | chr11 | 96341791  | 96341999  | RLTR15      | LTR ERVK                  |
| chr11 | 96341983  | 96342384  | chr11 | 96342110  | 96342220  | RLTR15      | LTR ERVK                  |
| chr11 | 96780309  | 96780710  | .     | .         | .         | .           | .                         |
| chr11 | 96868501  | 96868902  | chr11 | 96868575  | 96868633  | L2a         | LINE L2                   |
| chr11 | 97068279  | 97068680  | .     | .         | .         | .           | .                         |
| chr11 | 97171444  | 97171845  | chr11 | 97171463  | 97171519  | MIR         | SINE MIR                  |
| chr11 | 97261655  | 97262056  | .     | .         | .         | .           | .                         |
| chr11 | 97448795  | 97449196  | chr11 | 97448743  | 97448864  | MT2B        | LTR ERVL                  |
| chr11 | 97448795  | 97449196  | chr11 | 97448761  | 97448895  | B1_Mur4     | SINE Alu                  |
| chr11 | 97448795  | 97449196  | chr11 | 97448895  | 97448979  | (GA)n       | Simple_repe:Simple_repeat |
| chr11 | 97521319  | 97521720  | .     | .         | .         | .           | .                         |
| chr11 | 97781763  | 97782164  | chr11 | 97781828  | 97781972  | MIRc        | SINE MIR                  |
| chr11 | 97793576  | 97793977  | chr11 | 97793710  | 97793821  | PB1         | SINE Alu                  |
| chr11 | 97793576  | 97793977  | chr11 | 97793965  | 97794086  | B1_Mur4     | SINE Alu                  |
| chr11 | 97850021  | 97850422  | chr11 | 97850235  | 97850308  | tRNA-Cys-TG | tRNA tRNA                 |
| chr11 | 97906903  | 97907304  | chr11 | 97906859  | 97906951  | PB1D10      | SINE Alu                  |
| chr11 | 97906903  | 97907304  | chr11 | 97906995  | 97907174  | B3          | SINE B2                   |
| chr11 | 97906903  | 97907304  | chr11 | 97907213  | 97907304  | ID_B1       | SINE B4                   |
| chr11 | 97906903  | 97907304  | chr11 | 97907301  | 97907319  | B2_Mm2      | SINE B2                   |
| chr11 | 97918551  | 97918952  | .     | .         | .         | .           | .                         |
| chr11 | 97923424  | 97923825  | chr11 | 97923725  | 97923826  | MIR3        | SINE MIR                  |
| chr11 | 98293079  | 98293480  | .     | .         | .         | .           | .                         |
| chr11 | 98650192  | 98650593  | chr11 | 98650528  | 98650569  | (CA)n       | Simple_repe:Simple_repeat |
| chr11 | 98927260  | 98927661  | chr11 | 98927550  | 98927590  | (TG)n       | Simple_repe:Simple_repeat |
| chr11 | 98938049  | 98938450  | .     | .         | .         | .           | .                         |
| chr11 | 99056835  | 99057236  | .     | .         | .         | .           | .                         |
| chr11 | 100651053 | 100651454 | chr11 | 100651128 | 100651241 | MER5A1      | DNA MER1_type             |
| chr11 | 100821939 | 100822340 | .     | .         | .         | .           | .                         |
| chr11 | 100841267 | 100841668 | .     | .         | .         | .           | .                         |
| chr11 | 100864297 | 100864698 | .     | .         | .         | .           | .                         |
| chr11 | 101062344 | 101062745 | .     | .         | .         | .           | .                         |
| chr11 | 101148541 | 101148942 | .     | .         | .         | .           | .                         |
| chr11 | 101199560 | 101199961 | chr11 | 101199529 | 101199590 | CT-rich     | Low_comple:Low_complexity |
| chr11 | 101465801 | 101466202 | chr11 | 101466163 | 101466350 | U2          | snRNA snRNA               |
| chr11 | 101502690 | 101503091 | chr11 | 101503061 | 101503248 | U2          | snRNA snRNA               |
| chr11 | 101507214 | 101507615 | chr11 | 101507057 | 101507244 | U2          | snRNA snRNA               |
| chr11 | 101519181 | 101519582 | chr11 | 101519090 | 101519202 | PB1D7       | SINE Alu                  |
| chr11 | 101519181 | 101519582 | chr11 | 101519551 | 101519738 | U2          | snRNA snRNA               |
| chr11 | 101548461 | 101548862 | chr11 | 101548305 | 101548556 | L2c         | LINE L2                   |
| chr11 | 101708751 | 101709152 | chr11 | 101708958 | 101709115 | MLT1J       | LTR MaLR                  |
| chr11 | 102106401 | 102106802 | chr11 | 102106701 | 102106740 | (CACG)n     | Simple_repe:Simple_repeat |
| chr11 | 102170372 | 102170773 | .     | .         | .         | .           | .                         |
| chr11 | 102326877 | 102327278 | .     | .         | .         | .           | .                         |
| chr11 | 102505086 | 102505487 | chr11 | 102505057 | 102505141 | PB1D10      | SINE Alu                  |
| chr11 | 102672417 | 102672818 | .     | .         | .         | .           | .                         |

|       |           |           |       |           |                            |             |                |   |   |
|-------|-----------|-----------|-------|-----------|----------------------------|-------------|----------------|---|---|
| chr11 | 102751396 | 102751797 | .     | .         | .                          | .           | .              | . | . |
| chr11 | 102864523 | 102864924 | .     | .         | .                          | .           | .              | . | . |
| chr11 | 103035601 | 103036002 | .     | .         | .                          | .           | .              | . | . |
| chr11 | 103107591 | 103107992 | .     | .         | .                          | .           | .              | . | . |
| chr11 | 103153346 | 103153747 | .     | .         | .                          | .           | .              | . | . |
| chr11 | 103625064 | 103625465 | .     | .         | .                          | .           | .              | . | . |
| chr11 | 103758331 | 103758732 | .     | .         | .                          | .           | .              | . | . |
| chr11 | 103781907 | 103782308 | chr11 | 103782235 | 103782261 AT_rich          | Low_comple  | Low_complexity |   |   |
| chr11 | 103781907 | 103782308 | chr11 | 103782296 | 103782359 B3               | SINE        | B2             |   |   |
| chr11 | 103845262 | 103845663 | .     | .         | .                          | .           | .              | . | . |
| chr11 | 103878833 | 103879234 | .     | .         | .                          | .           | .              | . | . |
| chr11 | 103896486 | 103896887 | .     | .         | .                          | .           | .              | . | . |
| chr11 | 104022445 | 104022846 | .     | .         | .                          | .           | .              | . | . |
| chr11 | 104057060 | 104057461 | chr11 | 104056979 | 104057079 MIRb             | SINE        | MIR            |   |   |
| chr11 | 104150645 | 104151046 | .     | .         | .                          | .           | .              | . | . |
| chr11 | 104164844 | 104165245 | .     | .         | .                          | .           | .              | . | . |
| chr11 | 104466211 | 104466612 | chr11 | 104466146 | 104466250 L1MC4            | LINE        | L1             |   |   |
| chr11 | 104466211 | 104466612 | chr11 | 104466395 | 104466609 ORR1D1           | LTR         | MaLR           |   |   |
| chr11 | 104472910 | 104473311 | chr11 | 104473134 | 104473161 (TG)n            | Simple_repe | Simple_repeat  |   |   |
| chr11 | 104487317 | 104487718 | .     | .         | .                          | .           | .              | . | . |
| chr11 | 104981980 | 104982381 | chr11 | 104982026 | 104982247 RMER15           | LTR         | ERVL           |   |   |
| chr11 | 105021319 | 105021720 | chr11 | 105021207 | 105021349 B1_Mur3          | SINE        | Alu            |   |   |
| chr11 | 105021319 | 105021720 | chr11 | 105021640 | 105021723 (TTTC)n          | Simple_repe | Simple_repeat  |   |   |
| chr11 | 105021319 | 105021720 | chr11 | 105021437 | 105021640 RMER10B          | LTR         | ERVL           |   |   |
| chr11 | 105172774 | 105173175 | .     | .         | .                          | .           | .              | . | . |
| chr11 | 105270116 | 105270517 | .     | .         | .                          | .           | .              | . | . |
| chr11 | 105301119 | 105301520 | chr11 | 105301033 | 105301357 Tigger7          | DNA         | MER2_type      |   |   |
| chr11 | 105301119 | 105301520 | chr11 | 105301465 | 105301782 MTE2a            | LTR         | MaLR           |   |   |
| chr11 | 105392111 | 105392512 | .     | .         | .                          | .           | .              | . | . |
| chr11 | 105684578 | 105684979 | .     | .         | .                          | .           | .              | . | . |
| chr11 | 105814755 | 105815156 | chr11 | 105815107 | 105815214 B1F              | SINE        | Alu            |   |   |
| chr11 | 105922718 | 105923119 | chr11 | 105922641 | 105922744 PB1D9            | SINE        | Alu            |   |   |
| chr11 | 105922718 | 105923119 | chr11 | 105922770 | 105922917 L1MB8            | LINE        | L1             |   |   |
| chr11 | 105922718 | 105923119 | chr11 | 105922919 | 105923095 MTD              | LTR         | MaLR           |   |   |
| chr11 | 105922718 | 105923119 | chr11 | 105923095 | 105923158 (TCCC)n          | Simple_repe | Simple_repeat  |   |   |
| chr11 | 106248331 | 106248732 | chr11 | 106248405 | 106248608 RLTR15           | LTR         | ERVK           |   |   |
| chr11 | 106254461 | 106254862 | chr11 | 106254294 | 106254502 B2_Mm2           | SINE        | B2             |   |   |
| chr11 | 106336562 | 106336963 | .     | .         | .                          | .           | .              | . | . |
| chr11 | 106341611 | 106342012 | chr11 | 106341865 | 106342108 MARNA            | DNA         | Mariner        |   |   |
| chr11 | 106417031 | 106417432 | .     | .         | .                          | .           | .              | . | . |
| chr11 | 106449985 | 106450386 | .     | .         | .                          | .           | .              | . | . |
| chr11 | 106509547 | 106509948 | chr11 | 106509480 | 106509664 MTEa             | LTR         | MaLR           |   |   |
| chr11 | 106527704 | 106528105 | chr11 | 106527778 | 106527926 MER20            | DNA         | MER1_type      |   |   |
| chr11 | 106527704 | 106528105 | chr11 | 106527939 | 106528017 ID4              | SINE        | ID             |   |   |
| chr11 | 106569151 | 106569552 | .     | .         | .                          | .           | .              | . | . |
| chr11 | 106791765 | 106792166 | .     | .         | .                          | .           | .              | . | . |
| chr11 | 106874012 | 106874413 | chr11 | 106874181 | 106874249 tRNA-Arg-AG tRNA |             | tRNA           |   |   |
| chr11 | 106974418 | 106974819 | .     | .         | .                          | .           | .              | . | . |
| chr11 | 107018820 | 107019221 | chr11 | 107019163 | 107019261 MIRc             | SINE        | MIR            |   |   |
| chr11 | 107645485 | 107645886 | chr11 | 107645736 | 107645876 (TAGG)n          | Simple_repe | Simple_repeat  |   |   |
| chr11 | 107934067 | 107934468 | .     | .         | .                          | .           | .              | . | . |
| chr11 | 108011612 | 108012013 | .     | .         | .                          | .           | .              | . | . |
| chr11 | 108076796 | 108077197 | .     | .         | .                          | .           | .              | . | . |
| chr11 | 108873100 | 108873501 | chr11 | 108872959 | 108873436 LSU-rRNA_Hr rRNA |             | rRNA           |   |   |
| chr11 | 109533195 | 109533596 | chr11 | 109533502 | 109533622 B4A              | SINE        | B4             |   |   |
| chr11 | 109533195 | 109533596 | chr11 | 109533519 | 109533626 PB1D10           | SINE        | Alu            |   |   |
| chr11 | 109598634 | 109599035 | .     | .         | .                          | .           | .              | . | . |
| chr11 | 109678147 | 109678548 | chr11 | 109678111 | 109678151 ID               | SINE        | ID             |   |   |
| chr11 | 109678147 | 109678548 | chr11 | 109678178 | 109678285 PB1D10           | SINE        | Alu            |   |   |
| chr11 | 109721466 | 109721867 | .     | .         | .                          | .           | .              | . | . |
| chr11 | 109755681 | 109756082 | chr11 | 109755463 | 109755935 RLTR23           | LTR         | ERV1           |   |   |
| chr11 | 109755681 | 109756082 | chr11 | 109755965 | 109756162 MLT1C            | LTR         | MaLR           |   |   |
| chr11 | 110266950 | 110267351 | .     | .         | .                          | .           | .              | . | . |
| chr11 | 110372725 | 110373126 | .     | .         | .                          | .           | .              | . | . |
| chr11 | 110456413 | 110456814 | .     | .         | .                          | .           | .              | . | . |
| chr11 | 110464378 | 110464779 | chr11 | 110464409 | 110464653 L2               | LINE        | L2             |   |   |
| chr11 | 110577888 | 110578289 | chr11 | 110577863 | 110577985 MTEa             | LTR         | MaLR           |   |   |
| chr11 | 110577888 | 110578289 | chr11 | 110578067 | 110578301 MTEa             | LTR         | MaLR           |   |   |
| chr11 | 110742259 | 110742660 | .     | .         | .                          | .           | .              | . | . |
| chr11 | 110796991 | 110797392 | chr11 | 110796981 | 110797029 (CAGAGA)n        | Simple_repe | Simple_repeat  |   |   |
| chr11 | 110796991 | 110797392 | chr11 | 110797375 | 110797477 L1MA8            | LINE        | L1             |   |   |
| chr11 | 110804215 | 110804616 | .     | .         | .                          | .           | .              | . | . |
| chr11 | 111549712 | 111550113 | chr11 | 111549697 | 111549817 RSINE1           | SINE        | B4             |   |   |
| chr11 | 112476966 | 112477367 | chr11 | 112477106 | 112477327 L2               | LINE        | L2             |   |   |
| chr11 | 112711854 | 112712255 | chr11 | 112711897 | 112712000 L4               | LINE        | RTE            |   |   |
| chr11 | 112862320 | 112862721 | chr11 | 112862288 | 112862331 (CA)n            | Simple_repe | Simple_repeat  |   |   |
| chr11 | 112862320 | 112862721 | chr11 | 112862675 | 112862916 MER20            | DNA         | MER1_type      |   |   |
| chr11 | 112888079 | 112888480 | .     | .         | .                          | .           | .              | . | . |
| chr11 | 112924473 | 112924874 | .     | .         | .                          | .           | .              | . | . |
| chr11 | 113158526 | 113158927 | chr11 | 113158851 | 113159068 ID_B1            | SINE        | B4             |   |   |
| chr11 | 113194037 | 113194438 | chr11 | 113193859 | 113194210 RMER10A          | LTR         | ERVL           |   |   |
| chr11 | 113478766 | 113479167 | .     | .         | .                          | .           | .              | . | . |
| chr11 | 115034333 | 115034734 | chr11 | 115034415 | 115034628 URR1B            | DNA         | MER1_type      |   |   |
| chr11 | 115034333 | 115034734 | chr11 | 115034723 | 115034743 (C)n             | Simple_repe | Simple_repeat  |   |   |
| chr11 | 115152333 | 115152734 | chr11 | 115152086 | 115152348 B4A              | SINE        | B4             |   |   |
| chr11 | 115152333 | 115152734 | chr11 | 115152638 | 115152665 (CAGA)n          | Simple_repe | Simple_repeat  |   |   |
| chr11 | 115274388 | 115274789 | chr11 | 115274375 | 115274396 AT_rich          | Low_comple  | Low_complexity |   |   |
| chr11 | 115274388 | 115274789 | chr11 | 115274618 | 115274690 tRNA-Arg-AG tRNA |             | tRNA           |   |   |
| chr11 | 115289059 | 115289460 | .     | .         | .                          | .           | .              | . | . |
| chr11 | 115584024 | 115584425 | .     | .         | .                          | .           | .              | . | . |
| chr11 | 115595299 | 115595700 | .     | .         | .                          | .           | .              | . | . |
| chr11 | 115819278 | 115819679 | chr11 | 115819646 | 115819704 (CAGCC)n         | Simple_repe | Simple_repeat  |   |   |
| chr11 | 115831549 | 115831950 | chr11 | 115831899 | 115831939 B4A              | SINE        | B4             |   |   |
| chr11 | 115866112 | 115866513 | .     | .         | .                          | .           | .              | . | . |
| chr11 | 116037233 | 116037634 | chr11 | 116037231 | 116037408 Lx5              | LINE        | L1             |   |   |

|       |           |           |       |           |           |           |                           |                |
|-------|-----------|-----------|-------|-----------|-----------|-----------|---------------------------|----------------|
| chr11 | 116037233 | 116037634 | chr11 | 116037415 | 116037606 | MTC       | LTR                       | MaLR           |
| chr11 | 116037233 | 116037634 | chr11 | 116037607 | 116037797 | B2_Mm1a   | SINE                      | B2             |
| chr11 | 116080003 | 116080404 | .     | .         | .         | .         | .                         | .              |
| chr11 | 116180714 | 116181115 | .     | .         | .         | .         | .                         | .              |
| chr11 | 116307397 | 116307798 | .     | .         | .         | .         | .                         | .              |
| chr11 | 116943145 | 116943546 | chr11 | 116943412 | 116943587 | URR1B     | DNA                       | MER1_type      |
| chr11 | 116970589 | 116970990 | .     | .         | .         | .         | .                         | .              |
| chr11 | 117037641 | 117038042 | chr11 | 117037892 | 117038070 | (TATG)n   | Simple_repe:Simple_repeat |                |
| chr11 | 117069376 | 117069777 | chr11 | 117069259 | 117069455 | B4A       | SINE                      | B4             |
| chr11 | 117069376 | 117069777 | chr11 | 117069593 | 117069908 | Arthur1B  | DNA                       | Tip100         |
| chr11 | 117228270 | 117228671 | chr11 | 117228279 | 117228601 | MTEa      | LTR                       | MaLR           |
| chr11 | 117430023 | 117430424 | chr11 | 117430389 | 117430533 | B1_Mur1   | SINE                      | Alu            |
| chr11 | 117693314 | 117693715 | chr11 | 117693281 | 117693369 | RSINE1    | SINE                      | B4             |
| chr11 | 117693314 | 117693715 | chr11 | 117693372 | 117693407 | (CA)n     | Simple_repe:Simple_repeat |                |
| chr11 | 117873907 | 117874308 | chr11 | 117873886 | 117874013 | ID_B1     | SINE                      | B4             |
| chr11 | 117994426 | 117994827 | chr11 | 117994102 | 117994441 | ORR1A4    | LTR                       | MaLR           |
| chr11 | 117994426 | 117994827 | chr11 | 117994462 | 117994483 | MLT1J     | LTR                       | MaLR           |
| chr11 | 117994426 | 117994827 | chr11 | 117994483 | 117994535 | (TG)n     | Simple_repe:Simple_repeat |                |
| chr11 | 117994426 | 117994827 | chr11 | 117994535 | 117994741 | MLT1J     | LTR                       | MaLR           |
| chr11 | 118189010 | 118189411 | chr11 | 118189356 | 118189394 | (TGGa)n   | Simple_repe:Simple_repeat |                |
| chr11 | 118299937 | 118300338 | .     | .         | .         | .         | .                         | .              |
| chr11 | 119717907 | 119718308 | .     | .         | .         | .         | .                         | .              |
| chr11 | 120091172 | 120091573 | chr11 | 120091058 | 120091211 | URR1A     | DNA                       | MER1_type      |
| chr11 | 120103478 | 120103879 | .     | .         | .         | .         | .                         | .              |
| chr11 | 120118276 | 120118677 | .     | .         | .         | .         | .                         | .              |
| chr11 | 120177404 | 120177805 | .     | .         | .         | .         | .                         | .              |
| chr11 | 120408754 | 120409155 | chr11 | 120408908 | 120409120 | RLTR42    | LTR                       | ERVK           |
| chr11 | 120909568 | 120909969 | chr11 | 120909568 | 120909712 | B1_Mur1   | SINE                      | Alu            |
| chr11 | 120915000 | 120915401 | .     | .         | .         | .         | .                         | .              |
| chr11 | 121700750 | 121701151 | chr11 | 121700710 | 121701049 | RLTR15    | LTR                       | ERVK           |
| chr12 | 3109848   | 3110249   | chr12 | 3109871   | 3110121   | GSAT_MM   | Satellite                 | Satellite      |
| chr12 | 3349469   | 3349870   | chr12 | 3349426   | 3349490   | (GA)n     | Simple_repe:Simple_repeat |                |
| chr12 | 3349469   | 3349870   | chr12 | 3349700   | 3349806   | MIR3      | SINE                      | MIR            |
| chr12 | 3389318   | 3389719   | chr12 | 3389135   | 3389336   | B2_Mm2    | SINE                      | B2             |
| chr12 | 3389318   | 3389719   | chr12 | 3389336   | 3389390   | MIR3      | SINE                      | MIR            |
| chr12 | 3729750   | 3730151   | .     | .         | .         | .         | .                         | .              |
| chr12 | 4417554   | 4417955   | chr12 | 4417678   | 4418528   | L1MA6     | LINE                      | L1             |
| chr12 | 4499786   | 4500187   | chr12 | 4500002   | 4500075   | MLT1J1    | LTR                       | MaLR           |
| chr12 | 4499786   | 4500187   | chr12 | 4500161   | 4500459   | B4A       | SINE                      | B4             |
| chr12 | 5393444   | 5393845   | chr12 | 5393613   | 5393649   | MLT1J1    | LTR                       | MaLR           |
| chr12 | 5393444   | 5393845   | chr12 | 5393672   | 5393794   | MLT1J1    | LTR                       | MaLR           |
| chr12 | 5393444   | 5393845   | chr12 | 5393821   | 5393891   | (TCC)n    | Simple_repe:Simple_repeat |                |
| chr12 | 8364068   | 8364469   | chr12 | 8363519   | 8364087   | L1MB5     | LINE                      | L1             |
| chr12 | 8386559   | 8386960   | chr12 | 8386380   | 8386597   | URR1A     | DNA                       | MER1_type      |
| chr12 | 8457197   | 8457598   | .     | .         | .         | .         | .                         | .              |
| chr12 | 8516521   | 8516922   | .     | .         | .         | .         | .                         | .              |
| chr12 | 8554122   | 8554523   | .     | .         | .         | .         | .                         | .              |
| chr12 | 8647406   | 8647807   | chr12 | 8646110   | 8647444   | L1_Mus1   | LINE                      | L1             |
| chr12 | 8647406   | 8647807   | chr12 | 8647444   | 8647465   | AT_rich   | Low_comple                | Low_complexity |
| chr12 | 8647406   | 8647807   | chr12 | 8647478   | 8647516   | (A)n      | Simple_repe:Simple_repeat |                |
| chr12 | 9119090   | 9119491   | chr12 | 9119407   | 9119500   | LTR33     | LTR                       | ERVL           |
| chr12 | 9305910   | 9306311   | .     | .         | .         | .         | .                         | .              |
| chr12 | 9846865   | 9847266   | .     | .         | .         | .         | .                         | .              |
| chr12 | 9862857   | 9863258   | .     | .         | .         | .         | .                         | .              |
| chr12 | 10596314  | 10596715  | .     | .         | .         | .         | .                         | .              |
| chr12 | 15838752  | 15839153  | .     | .         | .         | .         | .                         | .              |
| chr12 | 15984912  | 15985313  | chr12 | 15985127  | 15985181  | LTR33B    | LTR                       | ERVL           |
| chr12 | 16018851  | 16019252  | .     | .         | .         | .         | .                         | .              |
| chr12 | 16365863  | 16366264  | .     | .         | .         | .         | .                         | .              |
| chr12 | 16484317  | 16484718  | chr12 | 16484297  | 16484397  | MLT1H2    | LTR                       | MaLR           |
| chr12 | 16532955  | 16533356  | .     | .         | .         | .         | .                         | .              |
| chr12 | 17227482  | 17227883  | .     | .         | .         | .         | .                         | .              |
| chr12 | 17246088  | 17246489  | chr12 | 17246254  | 17246398  | B1F       | SINE                      | Alu            |
| chr12 | 17516808  | 17517209  | .     | .         | .         | .         | .                         | .              |
| chr12 | 25840224  | 25840625  | .     | .         | .         | .         | .                         | .              |
| chr12 | 25866242  | 25866643  | chr12 | 25866137  | 25866504  | Charlie1a | DNA                       | MER1_type      |
| chr12 | 25866242  | 25866643  | chr12 | 25866527  | 25866709  | ID_B1     | SINE                      | B4             |
| chr12 | 25929917  | 25930318  | chr12 | 25929931  | 25929983  | (TG)n     | Simple_repe:Simple_repeat |                |
| chr12 | 25929917  | 25930318  | chr12 | 25929993  | 25930040  | (TC)n     | Simple_repe:Simple_repeat |                |
| chr12 | 25929917  | 25930318  | chr12 | 25930040  | 25930063  | (TG)n     | Simple_repe:Simple_repeat |                |
| chr12 | 29823814  | 29824215  | .     | .         | .         | .         | .                         | .              |
| chr12 | 29975792  | 29976193  | .     | .         | .         | .         | .                         | .              |
| chr12 | 30591914  | 30592315  | .     | .         | .         | .         | .                         | .              |
| chr12 | 30688467  | 30688868  | .     | .         | .         | .         | .                         | .              |
| chr12 | 31697124  | 31697525  | .     | .         | .         | .         | .                         | .              |
| chr12 | 31741375  | 31741776  | chr12 | 31741210  | 31741703  | RLTR19    | LTR                       | ERVK           |
| chr12 | 32700181  | 32700582  | .     | .         | .         | .         | .                         | .              |
| chr12 | 33174588  | 33174989  | chr12 | 33174724  | 33174783  | MLT1J     | LTR                       | MaLR           |
| chr12 | 33866933  | 33867334  | .     | .         | .         | .         | .                         | .              |
| chr12 | 35895012  | 35895413  | chr12 | 35895277  | 35895518  | L1_Mus3   | LINE                      | L1             |
| chr12 | 35930945  | 35931346  | .     | .         | .         | .         | .                         | .              |
| chr12 | 35976616  | 35977017  | .     | .         | .         | .         | .                         | .              |
| chr12 | 36559923  | 36560324  | .     | .         | .         | .         | .                         | .              |
| chr12 | 39570363  | 39570764  | chr12 | 39570460  | 39570485  | (CA)n     | Simple_repe:Simple_repeat |                |
| chr12 | 39631096  | 39631497  | .     | .         | .         | .         | .                         | .              |
| chr12 | 39655604  | 39656005  | .     | .         | .         | .         | .                         | .              |
| chr12 | 40170268  | 40170669  | chr12 | 40170474  | 40170591  | RLTR11A   | LTR                       | ERVK           |
| chr12 | 45363451  | 45363852  | chr12 | 45363422  | 45365080  | Lx5       | LINE                      | L1             |
| chr12 | 53089524  | 53089925  | chr12 | 53089420  | 53089569  | B1_Mur1   | SINE                      | Alu            |
| chr12 | 53227629  | 53228030  | .     | .         | .         | .         | .                         | .              |
| chr12 | 53482648  | 53483049  | .     | .         | .         | .         | .                         | .              |
| chr12 | 53549003  | 53549404  | chr12 | 53549133  | 53549219  | MLT1L     | LTR                       | MaLR           |
| chr12 | 53705572  | 53705973  | chr12 | 53705472  | 53705578  | U6        | snRNA                     | snRNA          |
| chr12 | 53883834  | 53884235  | .     | .         | .         | .         | .                         | .              |
| chr12 | 53919513  | 53919914  | .     | .         | .         | .         | .                         | .              |

|       |           |           |       |           |           |             |             |                |
|-------|-----------|-----------|-------|-----------|-----------|-------------|-------------|----------------|
| chr12 | 55810836  | 55811237  | chr12 | 55811002  | 55811060  | GA-rich     | Low_comple  | Low_complexity |
| chr12 | 55839580  | 55839981  | chr12 | 55839444  | 55839609  | U1          | snRNA       | snRNA          |
| chr12 | 55839580  | 55839981  | chr12 | 55839843  | 55839901  | CT-rich     | Low_comple  | Low_complexity |
| chr12 | 68160149  | 68160550  | chr12 | 68160158  | 68160943  | GSAT_MM     | Satellite   | Satellite      |
| chr12 | 70563082  | 70563483  | chr12 | 70563407  | 70563435  | (TGG)n      | Simple_repe | Simple_repeat  |
| chr12 | 70638260  | 70638661  | .     | .         | .         | .           | .           | .              |
| chr12 | 70754987  | 70755388  | chr12 | 70754967  | 70755033  | L1M5        | LINE        | L1             |
| chr12 | 70754987  | 70755388  | chr12 | 70755350  | 70755491  | L1M5        | LINE        | L1             |
| chr12 | 71725218  | 71725619  | .     | .         | .         | .           | .           | .              |
| chr12 | 74877336  | 74877737  | .     | .         | .         | .           | .           | .              |
| chr12 | 74891491  | 74891892  | .     | .         | .         | .           | .           | .              |
| chr12 | 75417963  | 75418364  | .     | .         | .         | .           | .           | .              |
| chr12 | 75905089  | 75905490  | chr12 | 75904824  | 75905492  | GSAT_MM     | Satellite   | Satellite      |
| chr12 | 76802130  | 76802531  | .     | .         | .         | .           | .           | .              |
| chr12 | 77568273  | 77568674  | chr12 | 77568503  | 77568717  | MER63D      | DNA         | AcHobo         |
| chr12 | 78239682  | 78240083  | .     | .         | .         | .           | .           | .              |
| chr12 | 78324636  | 78325037  | chr12 | 78324622  | 78324647  | (TTTA)n     | Simple_repe | Simple_repeat  |
| chr12 | 78324636  | 78325037  | chr12 | 78324647  | 78324808  | RSINE1      | SINE        | B4             |
| chr12 | 78324636  | 78325037  | chr12 | 78324808  | 78325100  | L1MEc       | LINE        | L1             |
| chr12 | 79071037  | 79071438  | chr12 | 79071037  | 79071333  | RLTR23      | LTR         | ERV1           |
| chr12 | 79071037  | 79071438  | chr12 | 79071333  | 79071411  | B3A         | SINE        | B2             |
| chr12 | 80594340  | 80594741  | chr12 | 80594368  | 80594641  | MLT1E3      | LTR         | MaLR           |
| chr12 | 80594340  | 80594741  | chr12 | 80594640  | 80594861  | MamRep605   | Unknown     | Unknown        |
| chr12 | 80654321  | 80654722  | .     | .         | .         | .           | .           | .              |
| chr12 | 80660470  | 80660871  | .     | .         | .         | .           | .           | .              |
| chr12 | 80713660  | 80714061  | .     | .         | .         | .           | .           | .              |
| chr12 | 81918906  | 81919307  | .     | .         | .         | .           | .           | .              |
| chr12 | 82849122  | 82849523  | chr12 | 82849243  | 82849315  | L1MC5       | LINE        | L1             |
| chr12 | 82849122  | 82849523  | chr12 | 82849431  | 82849536  | GA-rich     | Low_comple  | Low_complexity |
| chr12 | 83072760  | 83073161  | .     | .         | .         | .           | .           | .              |
| chr12 | 83256015  | 83256416  | chr12 | 83256024  | 83256078  | (TTTA)n     | Simple_repe | Simple_repeat  |
| chr12 | 84785294  | 84785695  | chr12 | 84785479  | 84785545  | MLT1J       | LTR         | MaLR           |
| chr12 | 86671069  | 86671470  | chr12 | 86671290  | 86671760  | MT2A        | LTR         | ERVL           |
| chr12 | 87341480  | 87341881  | .     | .         | .         | .           | .           | .              |
| chr12 | 87510072  | 87510473  | chr12 | 87509866  | 87510140  | LTR16B1     | LTR         | ERVL           |
| chr12 | 87670808  | 87671209  | chr12 | 87670778  | 87670886  | L1M2        | LINE        | L1             |
| chr12 | 88142068  | 88142469  | .     | .         | .         | .           | .           | .              |
| chr12 | 88174643  | 88175044  | chr12 | 88175002  | 88175030  | (A)n        | Simple_repe | Simple_repeat  |
| chr12 | 88229689  | 88230090  | chr12 | 88229719  | 88229743  | (CGGG)n     | Simple_repe | Simple_repeat  |
| chr12 | 88229689  | 88230090  | chr12 | 88229949  | 88229974  | (A)n        | Simple_repe | Simple_repeat  |
| chr12 | 88235279  | 88235680  | chr12 | 88235362  | 88235408  | G-rich      | Low_comple  | Low_complexity |
| chr12 | 88240468  | 88240869  | .     | .         | .         | .           | .           | .              |
| chr12 | 88282070  | 88282471  | .     | .         | .         | .           | .           | .              |
| chr12 | 99912792  | 99913193  | .     | .         | .         | .           | .           | .              |
| chr12 | 101592234 | 101592635 | chr12 | 101592568 | 101592869 | LTR37A      | LTR         | ERV1           |
| chr12 | 106221549 | 106221950 | .     | .         | .         | .           | .           | .              |
| chr12 | 107137747 | 107138148 | chr12 | 107137852 | 107138246 | MLT1J       | LTR         | MaLR           |
| chr12 | 107210798 | 107211199 | chr12 | 107210983 | 107211195 | MLT1J2      | LTR         | MaLR           |
| chr12 | 107622058 | 107622459 | .     | .         | .         | .           | .           | .              |
| chr12 | 109551617 | 109552018 | chr12 | 109551506 | 109551717 | LTR33A      | LTR         | ERVL           |
| chr12 | 109631826 | 109632227 | .     | .         | .         | .           | .           | .              |
| chr12 | 109642176 | 109642577 | .     | .         | .         | .           | .           | .              |
| chr12 | 109996171 | 109996572 | chr12 | 109996439 | 109996465 | (TG)n       | Simple_repe | Simple_repeat  |
| chr12 | 110655818 | 110656219 | .     | .         | .         | .           | .           | .              |
| chr12 | 110987956 | 110988357 | .     | .         | .         | .           | .           | .              |
| chr12 | 112664397 | 112664798 | .     | .         | .         | .           | .           | .              |
| chr12 | 113833719 | 113834120 | .     | .         | .         | .           | .           | .              |
| chr13 | 3372147   | 3372548   | chr13 | 3371784   | 3372149   | RLTR33      | LTR         | ERVK           |
| chr13 | 3372147   | 3372548   | chr13 | 3372476   | 3372531   | B1_Mur4     | SINE        | Alu            |
| chr13 | 3372147   | 3372548   | chr13 | 3372531   | 3372668   | B1_Mus1     | SINE        | Alu            |
| chr13 | 4318043   | 4318444   | chr13 | 4317276   | 4318746   | MYSERV6-int | LTR         | ERVK           |
| chr13 | 4770673   | 4771074   | chr13 | 4771017   | 4771056   | (GGGTG)n    | Simple_repe | Simple_repeat  |
| chr13 | 6403747   | 6404148   | chr13 | 6403773   | 6403828   | (TG)n       | Simple_repe | Simple_repeat  |
| chr13 | 6403747   | 6404148   | chr13 | 6403879   | 6403989   | GSAT_MM     | Satellite   | Satellite      |
| chr13 | 6403747   | 6404148   | chr13 | 6403994   | 6404093   | B4          | SINE        | B4             |
| chr13 | 14060980  | 14061381  | chr13 | 14061373  | 14061642  | MER63D      | DNA         | AcHobo         |
| chr13 | 15898927  | 15899328  | .     | .         | .         | .           | .           | .              |
| chr13 | 16579088  | 16579489  | chr13 | 16579225  | 16579713  | RLTR23      | LTR         | ERV1           |
| chr13 | 16751358  | 16751759  | .     | .         | .         | .           | .           | .              |
| chr13 | 21500246  | 21500647  | .     | .         | .         | .           | .           | .              |
| chr13 | 23504423  | 23504824  | chr13 | 23504809  | 23504882  | tRNA-Ala-GC | tRNA        | tRNA           |
| chr13 | 23773552  | 23773953  | .     | .         | .         | .           | .           | .              |
| chr13 | 27297781  | 27298182  | chr13 | 27297891  | 27297986  | (AATAG)n    | Simple_repe | Simple_repeat  |
| chr13 | 27297781  | 27298182  | chr13 | 27297987  | 27298165  | (GAGAA)n    | Simple_repe | Simple_repeat  |
| chr13 | 28403526  | 28403927  | .     | .         | .         | .           | .           | .              |
| chr13 | 28549275  | 28549676  | .     | .         | .         | .           | .           | .              |
| chr13 | 28724948  | 28725349  | .     | .         | .         | .           | .           | .              |
| chr13 | 28891348  | 28891749  | chr13 | 28891723  | 28891785  | Lx5         | LINE        | L1             |
| chr13 | 31465792  | 31466193  | chr13 | 31465400  | 31465933  | L1Md_F2     | LINE        | L1             |
| chr13 | 31465792  | 31466193  | chr13 | 31465977  | 31466049  | LTR33A      | LTR         | ERVL           |
| chr13 | 31724304  | 31724705  | .     | .         | .         | .           | .           | .              |
| chr13 | 34303147  | 34303548  | chr13 | 34303105  | 34303173  | (TTTTc)n    | Simple_repe | Simple_repeat  |
| chr13 | 34303147  | 34303548  | chr13 | 34303216  | 34303360  | B1_Mur3     | SINE        | Alu            |
| chr13 | 35258755  | 35259156  | .     | .         | .         | .           | .           | .              |
| chr13 | 36808521  | 36808922  | chr13 | 36808619  | 36808803  | LTR33A      | LTR         | ERVL           |
| chr13 | 37876066  | 37876467  | .     | .         | .         | .           | .           | .              |
| chr13 | 38412198  | 38412599  | .     | .         | .         | .           | .           | .              |
| chr13 | 39418111  | 39418512  | .     | .         | .         | .           | .           | .              |
| chr13 | 39679359  | 39679760  | chr13 | 39679484  | 39679730  | RMER15      | LTR         | ERVL           |
| chr13 | 39679359  | 39679760  | chr13 | 39679739  | 39679824  | RLTR20A2    | LTR         | ERVK           |
| chr13 | 39944770  | 39945171  | chr13 | 39944649  | 39944976  | Tigger7     | DNA         | MER2_type      |
| chr13 | 39944770  | 39945171  | chr13 | 39945138  | 39945161  | (GA)n       | Simple_repe | Simple_repeat  |
| chr13 | 40778964  | 40779365  | .     | .         | .         | .           | .           | .              |
| chr13 | 40818356  | 40818757  | chr13 | 40818398  | 40818444  | (CGGGG)n    | Simple_repe | Simple_repeat  |
| chr13 | 41084963  | 41085364  | chr13 | 41085096  | 41085200  | PB1D10      | SINE        | Alu            |



|       |           |           |       |           |           |            |             |                |
|-------|-----------|-----------|-------|-----------|-----------|------------|-------------|----------------|
| chr13 | 41180949  | 41181350  | chr13 | 41181033  | 41181173  | B1F        | SINE        | Alu            |
| chr13 | 41180949  | 41181350  | chr13 | 41181184  | 41182050  | Lx6        | LINE        | L1             |
| chr13 | 44397422  | 44397823  |       |           |           |            |             |                |
| chr13 | 45450235  | 45450636  | chr13 | 45450211  | 45450291  | RMER30     | DNA         | MER1_type      |
| chr13 | 45450235  | 45450636  | chr13 | 45450351  | 45450446  | MLT1J2     | LTR         | MaLR           |
| chr13 | 47357300  | 47357701  |       |           |           |            |             |                |
| chr13 | 48586746  | 48587147  |       |           |           |            |             |                |
| chr13 | 51303366  | 51303767  | chr13 | 51303443  | 51303589  | MLT1J1     | LTR         | MaLR           |
| chr13 | 51546012  | 51546413  | chr13 | 51545967  | 51546194  | MTD        | LTR         | MaLR           |
| chr13 | 51546012  | 51546413  | chr13 | 51546288  | 51546489  | MTE2a      | LTR         | MaLR           |
| chr13 | 52807032  | 52807433  |       |           |           |            |             |                |
| chr13 | 52924208  | 52924609  | chr13 | 52924603  | 52924636  | GA-rich    | Low_comple  | Low_complexity |
| chr13 | 52999504  | 52999905  | chr13 | 52999443  | 52999846  | Charlie2b  | DNA         | MER1_type      |
| chr13 | 54965436  | 54965837  | chr13 | 54965387  | 54965714  | MLT1J      | LTR         | MaLR           |
| chr13 | 54988735  | 54989136  |       |           |           |            |             |                |
| chr13 | 55612356  | 55612757  |       |           |           |            |             |                |
| chr13 | 55684567  | 55684968  | chr13 | 55684563  | 55684976  | RLTR15     | LTR         | ERVK           |
| chr13 | 58869618  | 58870019  | chr13 | 58869616  | 58869641  | AT-rich    | Low_comple  | Low_complexity |
| chr13 | 58869618  | 58870019  | chr13 | 58869645  | 58869850  | 7SLRNA     | srpRNA      | srpRNA         |
| chr13 | 58869618  | 58870019  | chr13 | 58869850  | 58870313  | Lx2        | LINE        | L1             |
| chr13 | 60152126  | 60152527  |       |           |           |            |             |                |
| chr13 | 60529181  | 60529582  |       |           |           |            |             |                |
| chr13 | 61577753  | 61578154  | chr13 | 61577723  | 61578233  | L1_Mur2    | LINE        | L1             |
| chr13 | 64445548  | 64445949  |       |           |           |            |             |                |
| chr13 | 65342626  | 65343027  |       |           |           |            |             |                |
| chr13 | 67209409  | 67209810  |       |           |           |            |             |                |
| chr13 | 67825069  | 67825470  |       |           |           |            |             |                |
| chr13 | 70597920  | 70598321  |       |           |           |            |             |                |
| chr13 | 70852186  | 70852587  |       |           |           |            |             |                |
| chr13 | 70874916  | 70875317  |       |           |           |            |             |                |
| chr13 | 71938494  | 71938895  |       |           |           |            |             |                |
| chr13 | 74528112  | 74528513  |       |           |           |            |             |                |
| chr13 | 74600325  | 74600726  |       |           |           |            |             |                |
| chr13 | 74754606  | 74755007  |       |           |           |            |             |                |
| chr13 | 75962372  | 75962773  |       |           |           |            |             |                |
| chr13 | 77578082  | 77578483  | chr13 | 77578053  | 77578114  | T-rich     | Low_comple  | Low_complexity |
| chr13 | 77578082  | 77578483  | chr13 | 77578170  | 77578318  | GSAT_MM    | Satellite   | Satellite      |
| chr13 | 80696443  | 80696844  |       |           |           |            |             |                |
| chr13 | 81003509  | 81003910  |       |           |           |            |             |                |
| chr13 | 83269615  | 83270016  | chr13 | 83269567  | 83269630  | MIRb       | SINE        | MIR            |
| chr13 | 89968037  | 89968438  | chr13 | 89968381  | 89968540  | MIR        | SINE        | MIR            |
| chr13 | 94745643  | 94746044  |       |           |           |            |             |                |
| chr13 | 94762331  | 94762732  | chr13 | 94762620  | 94762737  | MLT1H      | LTR         | MaLR           |
| chr13 | 94922367  | 94922768  |       |           |           |            |             |                |
| chr13 | 96403250  | 96403651  | chr13 | 96403250  | 96403379  | MER2       | DNA         | MER2_type      |
| chr13 | 96403250  | 96403651  | chr13 | 96403379  | 96403454  | (CA)n      | Simple_repe | Simple_repeat  |
| chr13 | 96403250  | 96403651  | chr13 | 96403463  | 96403567  | PB1        | SINE        | Alu            |
| chr13 | 96403250  | 96403651  | chr13 | 96403580  | 96403700  | MER2       | DNA         | MER2_type      |
| chr13 | 96704669  | 96705070  | chr13 | 96704733  | 96704983  | RLTR15     | LTR         | ERVK           |
| chr13 | 96704669  | 96705070  | chr13 | 96705031  | 96705545  | RCHARR1    | DNA         | MER1_type      |
| chr13 | 97709549  | 97709950  |       |           |           |            |             |                |
| chr13 | 97960328  | 97960729  | chr13 | 97960498  | 97960589  | LSU-rRNA_H | rRNA        | rRNA           |
| chr13 | 97974955  | 97975356  | chr13 | 97974909  | 97975048  | MLT1N2     | LTR         | MaLR           |
| chr13 | 97974955  | 97975356  | chr13 | 97975139  | 97975183  | LTR33B     | LTR         | ERVL           |
| chr13 | 98308470  | 98308871  |       |           |           |            |             |                |
| chr13 | 98448472  | 98448873  | chr13 | 98448613  | 98448887  | MLT2B1     | LTR         | ERVL           |
| chr13 | 99011301  | 99011702  | chr13 | 99011521  | 99011872  | MTEa       | LTR         | MaLR           |
| chr13 | 99167464  | 99167865  | chr13 | 99167539  | 99167740  | MLT1J      | LTR         | MaLR           |
| chr13 | 99223193  | 99223594  |       |           |           |            |             |                |
| chr13 | 99832932  | 99833333  |       |           |           |            |             |                |
| chr13 | 100560763 | 100561164 | chr13 | 100560902 | 100560943 | (CA)n      | Simple_repe | Simple_repeat  |
| chr13 | 100560763 | 100561164 | chr13 | 100560982 | 100561031 | (TG)n      | Simple_repe | Simple_repeat  |
| chr13 | 100560763 | 100561164 | chr13 | 100561043 | 100561074 | (TCTG)n    | Simple_repe | Simple_repeat  |
| chr13 | 101687471 | 101687872 | chr13 | 101687388 | 101688093 | Lx9        | LINE        | L1             |
| chr13 | 101709549 | 101709950 |       |           |           |            |             |                |
| chr13 | 104177023 | 104177424 |       |           |           |            |             |                |
| chr13 | 105310147 | 105310548 | chr13 | 105310310 | 105310724 | RLTR23     | LTR         | ERV1           |
| chr13 | 107824148 | 107824549 | chr13 | 107824161 | 107824525 | RLTR11A2   | LTR         | ERVK           |
| chr13 | 108172814 | 108173215 | chr13 | 108172559 | 108173002 | L1MD3      | LINE        | L1             |
| chr13 | 108172814 | 108173215 | chr13 | 108173174 | 108173609 | RLTR20B3   | LTR         | ERVK           |
| chr13 | 108275766 | 108276167 |       |           |           |            |             |                |
| chr13 | 111020306 | 111020707 |       |           |           |            |             |                |
| chr13 | 111531185 | 111531586 | chr13 | 111531145 | 111531424 | ORR1D1     | LTR         | MaLR           |
| chr13 | 113108402 | 113108803 |       |           |           |            |             |                |
| chr13 | 113616215 | 113616616 | chr13 | 113616304 | 113616455 | (CATATA)n  | Simple_repe | Simple_repeat  |
| chr13 | 115237411 | 115237812 | chr13 | 115237572 | 115237666 | LTR88b     | LTR         | Gypsy?         |
| chr13 | 115374816 | 115375217 |       |           |           |            |             |                |
| chr14 | 9848455   | 9848856   | chr14 | 9848211   | 9848583   | RLTR23     | LTR         | ERV1           |
| chr14 | 9848455   | 9848856   | chr14 | 9848680   | 9848737   | (CA)n      | Simple_repe | Simple_repeat  |
| chr14 | 15466535  | 15466936  | chr14 | 15466606  | 15466639  | (TTTG)n    | Simple_repe | Simple_repeat  |
| chr14 | 15466535  | 15466936  | chr14 | 15466640  | 15466845  | B3         | SINE        | B2             |
| chr14 | 21020262  | 21020663  |       |           |           |            |             |                |
| chr14 | 21066143  | 21066544  |       |           |           |            |             |                |
| chr14 | 22131847  | 22132248  | chr14 | 22132204  | 22132338  | ID_B1      | SINE        | B4             |
| chr14 | 22170906  | 22171307  |       |           |           |            |             |                |
| chr14 | 23933718  | 23934119  |       |           |           |            |             |                |
| chr14 | 25574255  | 25574656  | chr14 | 25574334  | 25574411  | B3A        | SINE        | B2             |
| chr14 | 25574255  | 25574656  | chr14 | 25574433  | 25574557  | MLT1J      | LTR         | MaLR           |
| chr14 | 26005771  | 26006172  |       |           |           |            |             |                |
| chr14 | 26123878  | 26124279  | chr14 | 26123937  | 26123968  | (CAGA)n    | Simple_repe | Simple_repeat  |
| chr14 | 26180250  | 26180651  |       |           |           |            |             |                |
| chr14 | 26295542  | 26295943  |       |           |           |            |             |                |
| chr14 | 26595818  | 26596219  | chr14 | 26596043  | 26596138  | MLT1A1     | LTR         | MaLR           |
| chr14 | 26595818  | 26596219  | chr14 | 26596138  | 26596215  | ID4_       | SINE        | ID             |
| chr14 | 26595818  | 26596219  | chr14 | 26596215  | 26596270  | MLT1A1     | LTR         | MaLR           |

|       |           |           |       |           |           |           |             |                |
|-------|-----------|-----------|-------|-----------|-----------|-----------|-------------|----------------|
| chr14 | 30224091  | 30224492  | chr14 | 30224291  | 30224379  | MLT1J2    | LTR         | MaLR           |
| chr14 | 30456399  | 30456800  | chr14 | 30456378  | 30456439  | (CA)n     | Simple_repe | Simple_repeat  |
| chr14 | 30456399  | 30456800  | chr14 | 30456547  | 30456701  | MLT1J2    | LTR         | MaLR           |
| chr14 | 31694650  | 31695051  | chr14 | 31694595  | 31694784  | B3        | SINE        | B2             |
| chr14 | 32475474  | 32475875  | chr14 | 32475818  | 32475892  | MER5B     | DNA         | MER1_type      |
| chr14 | 32776782  | 32777183  |       |           |           |           |             |                |
| chr14 | 33667219  | 33667620  | chr14 | 33667057  | 33667335  | B4A       | SINE        | B4             |
| chr14 | 33667219  | 33667620  | chr14 | 33667340  | 33667458  | PB1       | SINE        | Alu            |
| chr14 | 34060920  | 34061321  | chr14 | 34061277  | 34061334  | (TATATG)n | Simple_repe | Simple_repeat  |
| chr14 | 47256000  | 47256401  |       |           |           |           |             |                |
| chr14 | 47970686  | 47971087  | chr14 | 47970766  | 47970858  | MTEa      | LTR         | MaLR           |
| chr14 | 47970686  | 47971087  | chr14 | 47970880  | 47971046  | B3A       | SINE        | B2             |
| chr14 | 47970686  | 47971087  | chr14 | 47971046  | 47971097  | B1_Mus1   | SINE        | Alu            |
| chr14 | 48058616  | 48059017  | chr14 | 48058783  | 48058883  | MLT2F     | LTR         | ERV1           |
| chr14 | 48058616  | 48059017  | chr14 | 48058982  | 48059175  | B2_Mm1a   | SINE        | B2             |
| chr14 | 48564285  | 48564686  | chr14 | 48564177  | 48564324  | B1_Mus2   | SINE        | Alu            |
| chr14 | 48564285  | 48564686  | chr14 | 48564324  | 48564337  | (CAAA)n   | Simple_repe | Simple_repeat  |
| chr14 | 48611714  | 48612115  |       |           |           |           |             |                |
| chr14 | 57910477  | 57910878  |       |           |           |           |             |                |
| chr14 | 60232976  | 60233377  | chr14 | 60232917  | 60233108  | B2_Mm1a   | SINE        | B2             |
| chr14 | 60232976  | 60233377  | chr14 | 60233108  | 60233204  | PB1       | SINE        | Alu            |
| chr14 | 62267467  | 62267868  |       |           |           |           |             |                |
| chr14 | 63751209  | 63751610  |       |           |           |           |             |                |
| chr14 | 63996771  | 63997172  | chr14 | 63996876  | 63996981  | MLT1J     | LTR         | MaLR           |
| chr14 | 64512332  | 64512733  |       |           |           |           |             |                |
| chr14 | 65245909  | 65246310  | chr14 | 65246133  | 65246313  | L1MB2     | LINE        | L1             |
| chr14 | 65768799  | 65769200  |       |           |           |           |             |                |
| chr14 | 67057402  | 67057803  | chr14 | 67057728  | 67057897  | L1MC3     | LINE        | L1             |
| chr14 | 71528532  | 71528933  |       |           |           |           |             |                |
| chr14 | 73924648  | 73925049  |       |           |           |           |             |                |
| chr14 | 75444980  | 75445381  |       |           |           |           |             |                |
| chr14 | 76234076  | 76234477  |       |           |           |           |             |                |
| chr14 | 78644626  | 78645027  | chr14 | 78644577  | 78644728  | MER119    | DNA         | MER1_type      |
| chr14 | 78644626  | 78645027  | chr14 | 78644753  | 78644876  | MLT1J2    | LTR         | MaLR           |
| chr14 | 79581491  | 79581892  |       |           |           |           |             |                |
| chr14 | 86909084  | 86909485  |       |           |           |           |             |                |
| chr14 | 104736008 | 104736409 | chr14 | 104735912 | 104736135 | Lx8       | LINE        | L1             |
| chr14 | 104736008 | 104736409 | chr14 | 104736139 | 104736301 | (CGGAA)n  | Simple_repe | Simple_repeat  |
| chr14 | 104736008 | 104736409 | chr14 | 104736301 | 104737357 | L1_Mur3   | LINE        | L1             |
| chr14 | 105727888 | 105728289 |       |           |           |           |             |                |
| chr14 | 118329835 | 118330236 |       |           |           |           |             |                |
| chr14 | 118398096 | 118398497 | chr14 | 118398147 | 118398257 | MLT1C     | LTR         | MaLR           |
| chr14 | 118398096 | 118398497 | chr14 | 118398450 | 118399480 | (GA)n     | Simple_repe | Simple_repeat  |
| chr14 | 121231517 | 121231918 |       |           |           |           |             |                |
| chr14 | 122223841 | 122224242 |       |           |           |           |             |                |
| chr14 | 123572381 | 123572782 | chr14 | 123572459 | 123572500 | (TG)n     | Simple_repe | Simple_repeat  |
| chr14 | 123572381 | 123572782 | chr14 | 123572510 | 123572714 | B4A       | SINE        | B4             |
| chr15 | 3657594   | 3657995   |       |           |           |           |             |                |
| chr15 | 3849203   | 3849604   |       |           |           |           |             |                |
| chr15 | 5445169   | 5445570   |       |           |           |           |             |                |
| chr15 | 5815719   | 5816120   | chr15 | 5814775   | 5815910   | Lx9       | LINE        | L1             |
| chr15 | 6585488   | 6585889   | chr15 | 6585614   | 6585810   | MIRb      | SINE        | MIR            |
| chr15 | 7700401   | 7700802   |       |           |           |           |             |                |
| chr15 | 7828113   | 7828514   | chr15 | 7828500   | 7828525   | AT_rich   | Low_comple  | Low_complexity |
| chr15 | 7881595   | 7881996   |       |           |           |           |             |                |
| chr15 | 10688614  | 10689015  |       |           |           |           |             |                |
| chr15 | 11014662  | 11015063  |       |           |           |           |             |                |
| chr15 | 11454283  | 11454684  | chr15 | 11454595  | 11454625  | AT_rich   | Low_comple  | Low_complexity |
| chr15 | 12041152  | 12041553  | chr15 | 12041377  | 12041508  | L2a       | LINE        | L2             |
| chr15 | 12573529  | 12573930  | chr15 | 12572096  | 12577029  | Lx5       | LINE        | L1             |
| chr15 | 16284636  | 16285037  | chr15 | 16284653  | 16284759  | RMER6A    | LTR         | ERVK           |
| chr15 | 16284636  | 16285037  | chr15 | 16284759  | 16285119  | RLTR23    | LTR         | ERV1           |
| chr15 | 23511622  | 23512023  |       |           |           |           |             |                |
| chr15 | 25507119  | 25507520  |       |           |           |           |             |                |
| chr15 | 25582745  | 25583146  |       |           |           |           |             |                |
| chr15 | 25844743  | 25845144  |       |           |           |           |             |                |
| chr15 | 27162531  | 27162932  |       |           |           |           |             |                |
| chr15 | 27348263  | 27348664  | chr15 | 27347853  | 27348293  | MTE2a     | LTR         | MaLR           |
| chr15 | 27779668  | 27780069  | chr15 | 27779535  | 27779818  | MTC       | LTR         | MaLR           |
| chr15 | 27780545  | 27780946  |       |           |           |           |             |                |
| chr15 | 27927284  | 27927685  | chr15 | 27927609  | 27927742  | MER94     | DNA         | AcHobo         |
| chr15 | 31021902  | 31022303  |       |           |           |           |             |                |
| chr15 | 31117266  | 31117667  | chr15 | 31117666  | 31117700  | (T)n      | Simple_repe | Simple_repeat  |
| chr15 | 32258359  | 32258760  |       |           |           |           |             |                |
| chr15 | 32485950  | 32486351  |       |           |           |           |             |                |
| chr15 | 32930199  | 32930600  |       |           |           |           |             |                |
| chr15 | 33836910  | 33837311  |       |           |           |           |             |                |
| chr15 | 34145374  | 34145775  |       |           |           |           |             |                |
| chr15 | 34342285  | 34342686  |       |           |           |           |             |                |
| chr15 | 35139373  | 35139774  | chr15 | 35139235  | 35139694  | RMER6B    | LTR         | ERVK           |
| chr15 | 35139373  | 35139774  | chr15 | 35139694  | 35139837  | (TG)n     | Simple_repe | Simple_repeat  |
| chr15 | 36625346  | 36625747  | chr15 | 36625387  | 36625629  | MLT1J     | LTR         | MaLR           |
| chr15 | 36784505  | 36784906  | chr15 | 36784405  | 36784513  | L1MCa     | LINE        | L1             |
| chr15 | 36795446  | 36795847  | chr15 | 36795777  | 36796145  | ORR1B1    | LTR         | MaLR           |
| chr15 | 36814678  | 36815079  |       |           |           |           |             |                |
| chr15 | 38127181  | 38127582  |       |           |           |           |             |                |
| chr15 | 38174601  | 38175002  | chr15 | 38174900  | 38175056  | L2        | LINE        | L2             |
| chr15 | 38174601  | 38175002  | chr15 | 38174715  | 38174890  | MLT1J1    | LTR         | MaLR           |
| chr15 | 38400331  | 38400732  |       |           |           |           |             |                |
| chr15 | 47698082  | 47698483  | chr15 | 47698202  | 47698699  | RLTR23    | LTR         | ERV1           |
| chr15 | 50231688  | 50232089  | chr15 | 50232034  | 50232223  | MIRc      | SINE        | MIR            |
| chr15 | 50524241  | 50524642  |       |           |           |           |             |                |
| chr15 | 50529772  | 50530173  |       |           |           |           |             |                |
| chr15 | 50828731  | 50829132  |       |           |           |           |             |                |
| chr15 | 52512908  | 52513309  | chr15 | 52512768  | 52513112  | ORR1C1    | LTR         | MaLR           |

|       |          |          |       |          |          |            |             |                |
|-------|----------|----------|-------|----------|----------|------------|-------------|----------------|
| chr15 | 52512908 | 52513309 | chr15 | 52513113 | 52513891 | L1M2       | LINE        | L1             |
| chr15 | 52759912 | 52760313 |       |          |          |            |             |                |
| chr15 | 52970264 | 52970665 |       |          |          |            |             |                |
| chr15 | 53520614 | 53521015 |       |          |          |            |             |                |
| chr15 | 54009082 | 54009483 | chr15 | 54009446 | 54009639 | LTR33      | LTR         | ERV_L          |
| chr15 | 54218405 | 54218806 |       |          |          |            |             |                |
| chr15 | 54685900 | 54686301 |       |          |          |            |             |                |
| chr15 | 56596873 | 56597274 | chr15 | 56597252 | 56597392 | (GGAGA)n   | Simple_repe | Simple_repeat  |
| chr15 | 56673088 | 56673489 |       |          |          |            |             |                |
| chr15 | 57399637 | 57400038 |       |          |          |            |             |                |
| chr15 | 57555227 | 57555628 | chr15 | 57555227 | 57555429 | MLT1J1     | LTR         | MaLR           |
| chr15 | 58311795 | 58312196 | chr15 | 58311814 | 58312217 | Charlie21a | DNA         | MER1_type      |
| chr15 | 59343039 | 59343440 | chr15 | 59343230 | 59343282 | L2a        | LINE        | L2             |
| chr15 | 59343039 | 59343440 | chr15 | 59343421 | 59343519 | MIRc       | SINE        | MIR            |
| chr15 | 59355607 | 59356008 |       |          |          |            |             |                |
| chr15 | 59372474 | 59372875 | chr15 | 59372450 | 59372544 | B3A        | SINE        | B2             |
| chr15 | 59403413 | 59403814 |       |          |          |            |             |                |
| chr15 | 59428244 | 59428645 |       |          |          |            |             |                |
| chr15 | 59559798 | 59560199 |       |          |          |            |             |                |
| chr15 | 59591271 | 59591672 |       |          |          |            |             |                |
| chr15 | 59654696 | 59655097 | chr15 | 59655096 | 59655177 | GA-rich    | Low_comple  | Low_complexity |
| chr15 | 59659983 | 59660384 | chr15 | 59660325 | 59660434 | MIR3       | SINE        | MIR            |
| chr15 | 60158618 | 60159019 | chr15 | 60158466 | 60158843 | LTR16A     | LTR         | ERV_L          |
| chr15 | 61021238 | 61021639 | chr15 | 61021190 | 61021317 | MER121     | Unknown     | Unknown        |
| chr15 | 61073382 | 61073783 | chr15 | 61073301 | 61073601 | MLT1J2     | LTR         | MaLR           |
| chr15 | 61439822 | 61440223 |       |          |          |            |             |                |
| chr15 | 61486511 | 61486912 | chr15 | 61486477 | 61486560 | L2a        | LINE        | L2             |
| chr15 | 61486511 | 61486912 | chr15 | 61486568 | 61486599 | (TGAA)n    | Simple_repe | Simple_repeat  |
| chr15 | 61830331 | 61830732 |       |          |          |            |             |                |
| chr15 | 61875094 | 61875495 |       |          |          |            |             |                |
| chr15 | 61880911 | 61881312 | chr15 | 61880686 | 61880942 | L1ME1      | LINE        | L1             |
| chr15 | 61910840 | 61911241 |       |          |          |            |             |                |
| chr15 | 61970665 | 61971066 |       |          |          |            |             |                |
| chr15 | 62118874 | 62119275 |       |          |          |            |             |                |
| chr15 | 62159785 | 62160186 |       |          |          |            |             |                |
| chr15 | 62530140 | 62530541 | chr15 | 62530139 | 62530172 | CT-rich    | Low_comple  | Low_complexity |
| chr15 | 63389391 | 63389792 | chr15 | 63389305 | 63389472 | RMER4A     | LTR         | ERV_K          |
| chr15 | 64197104 | 64197505 | chr15 | 64197235 | 64197389 | MLT1J2     | LTR         | MaLR           |
| chr15 | 64208796 | 64209197 |       |          |          |            |             |                |
| chr15 | 64308587 | 64308988 | chr15 | 64308791 | 64309210 | L1MB8      | LINE        | L1             |
| chr15 | 66638796 | 66639197 | chr15 | 66638734 | 66638975 | Tigger16a  | DNA         | Tigger         |
| chr15 | 66830071 | 66830472 |       |          |          |            |             |                |
| chr15 | 67612188 | 67612589 | chr15 | 67612411 | 67612571 | B4         | SINE        | B4             |
| chr15 | 68107279 | 68107680 |       |          |          |            |             |                |
| chr15 | 71317822 | 71318223 | chr15 | 71317991 | 71318424 | LTR31      | LTR         | ERV1           |
| chr15 | 72834459 | 72834860 | chr15 | 72834571 | 72834646 | L2b        | LINE        | L2             |
| chr15 | 73265277 | 73265678 |       |          |          |            |             |                |
| chr15 | 74489416 | 74489817 |       |          |          |            |             |                |
| chr15 | 74532418 | 74532819 |       |          |          |            |             |                |
| chr15 | 74749876 | 74750277 | chr15 | 74749802 | 74749977 | L1_Mus3    | LINE        | L1             |
| chr15 | 74749876 | 74750277 | chr15 | 74749978 | 74750114 | LTR83      | LTR         | ERV_L          |
| chr15 | 74917030 | 74917431 | chr15 | 74917381 | 74917476 | RLTR11A    | LTR         | ERV_K          |
| chr15 | 75681214 | 75681615 | chr15 | 75681024 | 75681217 | B2_Mm1t    | SINE        | B2             |
| chr15 | 76034474 | 76034875 |       |          |          |            |             |                |
| chr15 | 76051174 | 76051575 | chr15 | 76051162 | 76051378 | B3A        | SINE        | B2             |
| chr15 | 76051174 | 76051575 | chr15 | 76051472 | 76051577 | PB1        | SINE        | Alu            |
| chr15 | 76059806 | 76060207 | chr15 | 76060000 | 76060021 | GC_rich    | Low_comple  | Low_complexity |
| chr15 | 76925603 | 76926004 |       |          |          |            |             |                |
| chr15 | 77166764 | 77167165 |       |          |          |            |             |                |
| chr15 | 77571873 | 77572274 | chr15 | 77572009 | 77572116 | ID_B1      | SINE        | B4             |
| chr15 | 77733386 | 77733787 | chr15 | 77733427 | 77733575 | RSINE1     | SINE        | B4             |
| chr15 | 77752031 | 77752432 | chr15 | 77751927 | 77752118 | B2_Mm1a    | SINE        | B2             |
| chr15 | 77764178 | 77764579 |       |          |          |            |             |                |
| chr15 | 77978992 | 77979393 | chr15 | 77978958 | 77979107 | MER58A     | DNA         | MER1_type      |
| chr15 | 77978992 | 77979393 | chr15 | 77979119 | 77979313 | MLT1J2     | LTR         | MaLR           |
| chr15 | 78280094 | 78280495 |       |          |          |            |             |                |
| chr15 | 78412220 | 78412621 |       |          |          |            |             |                |
| chr15 | 78678900 | 78679301 | chr15 | 78678847 | 78678948 | B1_Mur2    | SINE        | Alu            |
| chr15 | 78819044 | 78819445 | chr15 | 78819307 | 78819403 | MIR3       | SINE        | MIR            |
| chr15 | 79111732 | 79112133 |       |          |          |            |             |                |
| chr15 | 79294951 | 79295352 | chr15 | 79295197 | 79295334 | MIR        | SINE        | MIR            |
| chr15 | 79643992 | 79644393 |       |          |          |            |             |                |
| chr15 | 80180842 | 80181243 |       |          |          |            |             |                |
| chr15 | 80244771 | 80245172 |       |          |          |            |             |                |
| chr15 | 80266321 | 80266722 | chr15 | 80266469 | 80266585 | ORR1E      | LTR         | MaLR           |
| chr15 | 80917448 | 80917849 |       |          |          |            |             |                |
| chr15 | 81047539 | 81047940 |       |          |          |            |             |                |
| chr15 | 81077882 | 81078283 | chr15 | 81077690 | 81077929 | B4A        | SINE        | B4             |
| chr15 | 81077882 | 81078283 | chr15 | 81077981 | 81078129 | RSINE1     | SINE        | B4             |
| chr15 | 81094697 | 81095098 |       |          |          |            |             |                |
| chr15 | 81344662 | 81345063 |       |          |          |            |             |                |
| chr15 | 81686439 | 81686840 |       |          |          |            |             |                |
| chr15 | 82987849 | 82988250 | chr15 | 82988154 | 82988340 | RMER15     | LTR         | ERV_L          |
| chr15 | 83046151 | 83046552 |       |          |          |            |             |                |
| chr15 | 83053526 | 83053927 | chr15 | 83053218 | 83053631 | MTD        | LTR         | MaLR           |
| chr15 | 83112812 | 83113213 | chr15 | 83112609 | 83112814 | B3         | SINE        | B2             |
| chr15 | 83112812 | 83113213 | chr15 | 83112818 | 83112978 | B4A        | SINE        | B4             |
| chr15 | 83112812 | 83113213 | chr15 | 83112981 | 83113202 | RLTR42     | LTR         | ERV_K          |
| chr15 | 84020292 | 84020693 | chr15 | 84020489 | 84020705 | RLTR42     | LTR         | ERV_K          |
| chr15 | 85484534 | 85484935 |       |          |          |            |             |                |
| chr15 | 85528779 | 85529180 | chr15 | 85528728 | 85528880 | RLTR15     | LTR         | ERV_K          |
| chr15 | 85528779 | 85529180 | chr15 | 85528970 | 85529137 | RLTR15     | LTR         | ERV_K          |
| chr15 | 85897915 | 85898316 | chr15 | 85897836 | 85897943 | Tigger15a  | DNA         | TcMar          |
| chr15 | 85897915 | 85898316 | chr15 | 85897954 | 85898031 | G-rich     | Low_comple  | Low_complexity |
| chr15 | 85897915 | 85898316 | chr15 | 85898214 | 85898260 | (CA)n      | Simple_repe | Simple_repeat  |

|       |           |           |       |           |           |            |             |                |   |
|-------|-----------|-----------|-------|-----------|-----------|------------|-------------|----------------|---|
| chr15 | 85910280  | 85910681  | .     | .         | .         | .          | .           | .              | . |
| chr15 | 85920475  | 85920876  | .     | .         | .         | .          | .           | .              | . |
| chr15 | 88632812  | 88633213  | .     | .         | .         | .          | .           | .              | . |
| chr15 | 88684683  | 88685084  | chr15 | 88685031  | 88685083  | G-rich     | Low_comple  | Low_complexity |   |
| chr15 | 90454714  | 90455115  | chr15 | 90455010  | 90455101  | L2         | LINE        | L2             |   |
| chr15 | 91238894  | 91239295  | .     | .         | .         | .          | .           | .              | . |
| chr15 | 91445595  | 91445996  | chr15 | 91445437  | 91445832  | MTB        | LTR         | MaLR           |   |
| chr15 | 91445595  | 91445996  | chr15 | 91445959  | 91446002  | (TG)n      | Simple_repe | Simple_repeat  |   |
| chr15 | 91521032  | 91521433  | .     | .         | .         | .          | .           | .              | . |
| chr15 | 91533629  | 91534030  | .     | .         | .         | .          | .           | .              | . |
| chr15 | 94125160  | 94125561  | chr15 | 94125229  | 94125408  | RLTR15     | LTR         | ERVK           |   |
| chr15 | 94125160  | 94125561  | chr15 | 94125432  | 94125553  | RLTR15     | LTR         | ERVK           |   |
| chr15 | 94847121  | 94847522  | .     | .         | .         | .          | .           | .              | . |
| chr15 | 95633101  | 95633502  | .     | .         | .         | .          | .           | .              | . |
| chr15 | 95654306  | 95654707  | .     | .         | .         | .          | .           | .              | . |
| chr15 | 96337492  | 96337893  | chr15 | 96337661  | 96337760  | RLTR15     | LTR         | ERVK           |   |
| chr15 | 97417678  | 97418079  | chr15 | 97417532  | 97417725  | B2_Mm2     | SINE        | B2             |   |
| chr15 | 97417678  | 97418079  | chr15 | 97417725  | 97417838  | L1_Mur3    | LINE        | L1             |   |
| chr15 | 97417678  | 97418079  | chr15 | 97417838  | 97417984  | 7SLRNA     | srpRNA      | srpRNA         |   |
| chr15 | 97523834  | 97524235  | chr15 | 97524042  | 97524197  | LTR79      | LTR         | ERVL           |   |
| chr15 | 97581015  | 97581416  | .     | .         | .         | .          | .           | .              | . |
| chr15 | 97655763  | 97656164  | .     | .         | .         | .          | .           | .              | . |
| chr15 | 97744724  | 97745125  | .     | .         | .         | .          | .           | .              | . |
| chr15 | 97928942  | 97929343  | chr15 | 97928854  | 97929112  | RLTR15     | LTR         | ERVK           |   |
| chr15 | 97928942  | 97929343  | chr15 | 97929147  | 97929237  | RLTR15     | LTR         | ERVK           |   |
| chr15 | 97986328  | 97986729  | chr15 | 97986267  | 97986394  | B1_Mur2    | SINE        | Alu            |   |
| chr15 | 97986328  | 97986729  | chr15 | 97986435  | 97986877  | RLTR23     | LTR         | ERV1           |   |
| chr15 | 98343135  | 98343536  | chr15 | 98343123  | 98343157  | MT2A       | LTR         | ERVL           |   |
| chr15 | 98410501  | 98410902  | chr15 | 98410510  | 98410554  | (CA)n      | Simple_repe | Simple_repeat  |   |
| chr15 | 98697745  | 98698146  | .     | .         | .         | .          | .           | .              | . |
| chr15 | 98823461  | 98823862  | .     | .         | .         | .          | .           | .              | . |
| chr15 | 99163350  | 99163751  | .     | .         | .         | .          | .           | .              | . |
| chr15 | 99232023  | 99232424  | chr15 | 99232340  | 99232361  | AT_rich    | Low_comple  | Low_complexity |   |
| chr15 | 99378232  | 99378633  | chr15 | 99378376  | 99378473  | L1M2       | LINE        | L1             |   |
| chr15 | 99384213  | 99384614  | chr15 | 99384051  | 99384254  | ID_B1      | SINE        | B4             |   |
| chr15 | 99384213  | 99384614  | chr15 | 99384254  | 99384284  | Charlie1   | DNA         | MER1_type      |   |
| chr15 | 99384213  | 99384614  | chr15 | 99384284  | 99384358  | ID4        | SINE        | ID             |   |
| chr15 | 99384213  | 99384614  | chr15 | 99384358  | 99384564  | Charlie1   | DNA         | MER1_type      |   |
| chr15 | 99416150  | 99416551  | .     | .         | .         | .          | .           | .              | . |
| chr15 | 99919947  | 99920348  | .     | .         | .         | .          | .           | .              | . |
| chr15 | 100292177 | 100292578 | .     | .         | .         | .          | .           | .              | . |
| chr15 | 100909177 | 100909578 | chr15 | 100909561 | 100909590 | (TG)n      | Simple_repe | Simple_repeat  |   |
| chr15 | 100912971 | 100913372 | chr15 | 100913296 | 100913437 | PB1        | SINE        | Alu            |   |
| chr15 | 101151616 | 101152017 | chr15 | 101151814 | 101151951 | MIR        | SINE        | MIR            |   |
| chr15 | 101151616 | 101152017 | chr15 | 101151993 | 101152044 | polypurine | Low_comple  | Low_complexity |   |
| chr15 | 101212280 | 101212681 | .     | .         | .         | .          | .           | .              | . |
| chr15 | 101285704 | 101286105 | .     | .         | .         | .          | .           | .              | . |
| chr15 | 101800976 | 101801377 | chr15 | 101800943 | 101801011 | (TC)n      | Simple_repe | Simple_repeat  |   |
| chr15 | 102033872 | 102034273 | chr15 | 102034199 | 102034376 | (CGG)n     | Simple_repe | Simple_repeat  |   |
| chr15 | 102207651 | 102208052 | .     | .         | .         | .          | .           | .              | . |
| chr15 | 102402502 | 102402903 | .     | .         | .         | .          | .           | .              | . |
| chr15 | 102669418 | 102669819 | .     | .         | .         | .          | .           | .              | . |
| chr15 | 103051855 | 103052256 | chr15 | 103052096 | 103052127 | (TG)n      | Simple_repe | Simple_repeat  |   |
| chr15 | 103051855 | 103052256 | chr15 | 103052143 | 103052229 | B4A        | SINE        | B4             |   |
| chr15 | 103051855 | 103052256 | chr15 | 103052209 | 103052244 | B1_Mus2    | SINE        | Alu            |   |
| chr15 | 103137562 | 103137963 | .     | .         | .         | .          | .           | .              | . |
| chr15 | 103188783 | 103189184 | chr15 | 103188895 | 103189071 | MIR        | SINE        | MIR            |   |
| chr15 | 103200861 | 103201262 | .     | .         | .         | .          | .           | .              | . |
| chr16 | 3699347   | 3699748   | .     | .         | .         | .          | .           | .              | . |
| chr16 | 8823809   | 8824210   | chr16 | 8823726   | 8824032   | MLT1J      | LTR         | MaLR           |   |
| chr16 | 8823809   | 8824210   | chr16 | 8824043   | 8824234   | B3         | SINE        | B2             |   |
| chr16 | 10443805  | 10444206  | chr16 | 10443674  | 10443820  | YREP_Mm    | Unknown     | Unknown        |   |
| chr16 | 10443805  | 10444206  | chr16 | 10443836  | 10443935  | PB1D7      | SINE        | Alu            |   |
| chr16 | 10754616  | 10755017  | .     | .         | .         | .          | .           | .              | . |
| chr16 | 10850320  | 10850721  | .     | .         | .         | .          | .           | .              | . |
| chr16 | 10857432  | 10857833  | chr16 | 10857658  | 10857770  | L1MB8      | LINE        | L1             |   |
| chr16 | 10857432  | 10857833  | chr16 | 10857791  | 10857815  | (GGGA)n    | Simple_repe | Simple_repeat  |   |
| chr16 | 10975036  | 10975437  | chr16 | 10975160  | 10975376  | GSAT_MM    | Satellite   | Satellite      |   |
| chr16 | 11305641  | 11306042  | .     | .         | .         | .          | .           | .              | . |
| chr16 | 11330462  | 11330863  | chr16 | 11330823  | 11330957  | B1_Mur2    | SINE        | Alu            |   |
| chr16 | 13372073  | 13372474  | .     | .         | .         | .          | .           | .              | . |
| chr16 | 14303748  | 14304149  | chr16 | 14304040  | 14304152  | PB1D7      | SINE        | Alu            |   |
| chr16 | 14350896  | 14351297  | chr16 | 14350823  | 14351073  | L1MB3      | LINE        | L1             |   |
| chr16 | 14350896  | 14351297  | chr16 | 14351113  | 14351280  | L2         | LINE        | L2             |   |
| chr16 | 14451527  | 14451928  | chr16 | 14451731  | 14451812  | PB1D10     | SINE        | Alu            |   |
| chr16 | 15294459  | 15294860  | chr16 | 15294799  | 15295001  | B3         | SINE        | B2             |   |
| chr16 | 16104383  | 16104784  | chr16 | 16104334  | 16104418  | RMER1B     | Other       | Other          |   |
| chr16 | 16104383  | 16104784  | chr16 | 16104422  | 16105068  | RMER1B     | Other       | Other          |   |
| chr16 | 18789171  | 18789572  | chr16 | 18788932  | 18789206  | B4A        | SINE        | B4             |   |
| chr16 | 18789171  | 18789572  | chr16 | 18789291  | 18789494  | B3         | SINE        | B2             |   |
| chr16 | 21333254  | 21333655  | .     | .         | .         | .          | .           | .              | . |
| chr16 | 21778351  | 21778752  | chr16 | 21778438  | 21778864  | MLT1J      | LTR         | MaLR           |   |
| chr16 | 21827438  | 21827839  | chr16 | 21827668  | 21827713  | (TG)n      | Simple_repe | Simple_repeat  |   |
| chr16 | 21827438  | 21827839  | chr16 | 21827728  | 21827849  | L2a        | LINE        | L2             |   |
| chr16 | 21976256  | 21976657  | .     | .         | .         | .          | .           | .              | . |
| chr16 | 22182348  | 22182749  | .     | .         | .         | .          | .           | .              | . |
| chr16 | 22389664  | 22390065  | .     | .         | .         | .          | .           | .              | . |
| chr16 | 23272924  | 23273325  | .     | .         | .         | .          | .           | .              | . |
| chr16 | 24428088  | 24428489  | .     | .         | .         | .          | .           | .              | . |
| chr16 | 24933918  | 24934319  | .     | .         | .         | .          | .           | .              | . |
| chr16 | 25043363  | 25043764  | chr16 | 25043709  | 25043763  | (TC)n      | Simple_repe | Simple_repeat  |   |
| chr16 | 25485095  | 25485496  | .     | .         | .         | .          | .           | .              | . |
| chr16 | 25942215  | 25942616  | .     | .         | .         | .          | .           | .              | . |
| chr16 | 26211645  | 26212046  | chr16 | 26211543  | 26212012  | Lx8        | LINE        | L1             |   |
| chr16 | 26211645  | 26212046  | chr16 | 26212012  | 26212506  | MT2_Mm     | LTR         | ERVL           |   |

|       |          |          |       |          |          |             |                           |           |
|-------|----------|----------|-------|----------|----------|-------------|---------------------------|-----------|
| chr16 | 30442489 | 30442890 | chr16 | 30442506 | 30442554 | L2c         | LINE                      | L2        |
| chr16 | 30500303 | 30500704 | chr16 | 30500196 | 30500328 | B1_Mur2     | SINE                      | Alu       |
| chr16 | 30513728 | 30514129 | .     | .        | .        | .           | .                         | .         |
| chr16 | 30737223 | 30737624 | chr16 | 30737550 | 30737663 | MIRc        | SINE                      | MIR       |
| chr16 | 30876945 | 30877346 | chr16 | 30876915 | 30877081 | RSINE1      | SINE                      | B4        |
| chr16 | 31526733 | 31527134 | .     | .        | .        | .           | .                         | .         |
| chr16 | 31589575 | 31589976 | .     | .        | .        | .           | .                         | .         |
| chr16 | 31598522 | 31598923 | .     | .        | .        | .           | .                         | .         |
| chr16 | 32542350 | 32542751 | chr16 | 32542409 | 32542556 | B1_Mur2     | SINE                      | Alu       |
| chr16 | 32542350 | 32542751 | chr16 | 32542604 | 32542875 | MLT1K       | LTR                       | MaLR      |
| chr16 | 32858849 | 32859250 | chr16 | 32859079 | 32859210 | B1F         | SINE                      | Alu       |
| chr16 | 33736853 | 33737254 | chr16 | 33736666 | 33737203 | MER77       | LTR                       | ERV1      |
| chr16 | 33869758 | 33870159 | chr16 | 33869622 | 33869777 | RSINE1      | SINE                      | B4        |
| chr16 | 33869758 | 33870159 | chr16 | 33869777 | 33869823 | (CAT)n      | Simple_repe:Simple_repeat |           |
| chr16 | 33869758 | 33870159 | chr16 | 33869831 | 33870027 | B3          | SINE                      | B2        |
| chr16 | 33869758 | 33870159 | chr16 | 33870073 | 33870149 | RSINE1      | SINE                      | B4        |
| chr16 | 34490568 | 34490969 | .     | .        | .        | .           | .                         | .         |
| chr16 | 34528815 | 34529216 | .     | .        | .        | .           | .                         | .         |
| chr16 | 36874828 | 36875229 | .     | .        | .        | .           | .                         | .         |
| chr16 | 37814403 | 37814804 | chr16 | 37814700 | 37814760 | (TG)n       | Simple_repe:Simple_repeat |           |
| chr16 | 41686562 | 41686963 | .     | .        | .        | .           | .                         | .         |
| chr16 | 42897375 | 42897776 | .     | .        | .        | .           | .                         | .         |
| chr16 | 43363051 | 43363452 | chr16 | 43363087 | 43363222 | LFSINE_Vert | SINE                      | SINE      |
| chr16 | 43574186 | 43574587 | .     | .        | .        | .           | .                         | .         |
| chr16 | 44392296 | 44392697 | .     | .        | .        | .           | .                         | .         |
| chr16 | 45837980 | 45838381 | .     | .        | .        | .           | .                         | .         |
| chr16 | 51681420 | 51681821 | chr16 | 51681358 | 51681557 | B2_Mm2      | SINE                      | B2        |
| chr16 | 51681420 | 51681821 | chr16 | 51681557 | 51681892 | MTE2b       | LTR                       | MaLR      |
| chr16 | 55218686 | 55219087 | chr16 | 55218864 | 55219015 | MLT1J       | LTR                       | MaLR      |
| chr16 | 57391529 | 57391930 | chr16 | 57391225 | 57391786 | LSU-rRNA_Hr | rRNA                      | rRNA      |
| chr16 | 57391529 | 57391930 | chr16 | 57391786 | 57391910 | RSINE1      | SINE                      | B4        |
| chr16 | 65451293 | 65451694 | chr16 | 65451493 | 65451697 | L2          | LINE                      | L2        |
| chr16 | 72804444 | 72804845 | chr16 | 72804440 | 72804768 | L1_Mur2     | LINE                      | L1        |
| chr16 | 75542432 | 75542833 | chr16 | 75542558 | 75542741 | B3          | SINE                      | B2        |
| chr16 | 77643234 | 77643635 | .     | .        | .        | .           | .                         | .         |
| chr16 | 81439484 | 81439885 | .     | .        | .        | .           | .                         | .         |
| chr16 | 91200026 | 91200427 | chr16 | 91199994 | 91200343 | RLTR15      | LTR                       | ERVK      |
| chr16 | 91200026 | 91200427 | chr16 | 91200350 | 91200480 | ID_B1       | SINE                      | B4        |
| chr16 | 91200026 | 91200427 | chr16 | 91200378 | 91200486 | B1F         | SINE                      | Alu       |
| chr16 | 91200026 | 91200427 | chr16 | 91200404 | 91200498 | MT2B2       | LTR                       | ERV1      |
| chr16 | 91534719 | 91535120 | chr16 | 91534694 | 91534729 | (TG)n       | Simple_repe:Simple_repeat |           |
| chr16 | 91942857 | 91943258 | chr16 | 91943001 | 91943092 | ID4         | SINE                      | ID        |
| chr16 | 91942857 | 91943258 | chr16 | 91943134 | 91943252 | PB1D9       | SINE                      | Alu       |
| chr16 | 92022196 | 92022597 | chr16 | 92022485 | 92022584 | MLT1B       | LTR                       | MaLR      |
| chr16 | 92022196 | 92022597 | chr16 | 92022584 | 92022653 | (CTGGGG)n   | Simple_repe:Simple_repeat |           |
| chr16 | 92620943 | 92621344 | .     | .        | .        | .           | .                         | .         |
| chr16 | 92864376 | 92864777 | .     | .        | .        | .           | .                         | .         |
| chr16 | 92905899 | 92906300 | chr16 | 92905852 | 92906346 | RCHARR1     | DNA                       | MER1_type |
| chr16 | 93263517 | 93263918 | .     | .        | .        | .           | .                         | .         |
| chr16 | 93293153 | 93293554 | chr16 | 93293420 | 93293750 | LTR40b      | LTR                       | ERV1      |
| chr16 | 93918872 | 93919273 | chr16 | 93918870 | 93918931 | (CA)n       | Simple_repe:Simple_repeat |           |
| chr16 | 95658251 | 95658652 | chr16 | 95658264 | 95658305 | (GA)n       | Simple_repe:Simple_repeat |           |
| chr16 | 95898235 | 95898636 | chr16 | 95898399 | 95898488 | MLT1J1      | LTR                       | MaLR      |
| chr16 | 95898235 | 95898636 | chr16 | 95898562 | 95898698 | MLT1J1      | LTR                       | MaLR      |
| chr16 | 95987780 | 95988181 | .     | .        | .        | .           | .                         | .         |
| chr16 | 97528633 | 97529034 | chr16 | 97528418 | 97528641 | RLTR1B      | LTR                       | ERV1      |
| chr17 | 3200337  | 3200738  | .     | .        | .        | .           | .                         | .         |
| chr17 | 4626300  | 4626701  | chr17 | 4626173  | 4626353  | (CATTc)n    | Simple_repe:Simple_repeat |           |
| chr17 | 4626300  | 4626701  | chr17 | 4626353  | 4626388  | (CACTc)n    | Simple_repe:Simple_repeat |           |
| chr17 | 4626300  | 4626701  | chr17 | 4626388  | 4626598  | (CATTc)n    | Satellite                 | Satellite |
| chr17 | 5138717  | 5139118  | .     | .        | .        | .           | .                         | .         |
| chr17 | 5189657  | 5190058  | .     | .        | .        | .           | .                         | .         |
| chr17 | 5782767  | 5783168  | chr17 | 5782828  | 5782851  | (TG)n       | Simple_repe:Simple_repeat |           |
| chr17 | 5782767  | 5783168  | chr17 | 5782851  | 5782893  | (GA)n       | Simple_repe:Simple_repeat |           |
| chr17 | 5782767  | 5783168  | chr17 | 5782905  | 5783067  | RLTR15      | LTR                       | ERVK      |
| chr17 | 5782767  | 5783168  | chr17 | 5783084  | 5783126  | (CAGA)n     | Simple_repe:Simple_repeat |           |
| chr17 | 5782767  | 5783168  | chr17 | 5783162  | 5783327  | RLTR15      | LTR                       | ERVK      |
| chr17 | 5805960  | 5806361  | .     | .        | .        | .           | .                         | .         |
| chr17 | 5978704  | 5979105  | chr17 | 5978922  | 5979046  | MER63B      | DNA                       | AcHobo    |
| chr17 | 5994611  | 5995012  | .     | .        | .        | .           | .                         | .         |
| chr17 | 6016439  | 6016840  | chr17 | 6016490  | 6016523  | (ACTG)n     | Simple_repe:Simple_repeat |           |
| chr17 | 6016439  | 6016840  | chr17 | 6016804  | 6016946  | RSINE1      | SINE                      | B4        |
| chr17 | 6128088  | 6128489  | chr17 | 6127906  | 6128364  | RLTR23      | LTR                       | ERV1      |
| chr17 | 9049163  | 9049564  | chr17 | 9049368  | 9049473  | L4          | LINE                      | RTE       |
| chr17 | 9049163  | 9049564  | chr17 | 9049526  | 9049567  | (CCCCCA)n   | Simple_repe:Simple_repeat |           |
| chr17 | 12402440 | 12402841 | .     | .        | .        | .           | .                         | .         |
| chr17 | 12468689 | 12469090 | chr17 | 12468716 | 12468757 | L2b         | LINE                      | L2        |
| chr17 | 12984378 | 12984779 | chr17 | 12984365 | 12984442 | B1F         | SINE                      | Alu       |
| chr17 | 12984378 | 12984779 | chr17 | 12984389 | 12984448 | B4A         | SINE                      | B4        |
| chr17 | 14474660 | 14475061 | .     | .        | .        | .           | .                         | .         |
| chr17 | 14683117 | 14683518 | .     | .        | .        | .           | .                         | .         |
| chr17 | 14747903 | 14748304 | .     | .        | .        | .           | .                         | .         |
| chr17 | 14855805 | 14856206 | .     | .        | .        | .           | .                         | .         |
| chr17 | 16727450 | 16727851 | chr17 | 16727150 | 16727641 | MLT1H2-int  | LTR                       | MaLR      |
| chr17 | 16727450 | 16727851 | chr17 | 16727715 | 16727796 | MLT1H2      | LTR                       | MaLR      |
| chr17 | 16727450 | 16727851 | chr17 | 16727816 | 16727997 | B3          | SINE                      | B2        |
| chr17 | 17929546 | 17929947 | chr17 | 17929555 | 17929922 | Lx8         | LINE                      | L1        |
| chr17 | 17929546 | 17929947 | chr17 | 17929941 | 17930145 | B4A         | SINE                      | B4        |
| chr17 | 17974814 | 17975215 | .     | .        | .        | .           | .                         | .         |
| chr17 | 21575789 | 21576190 | chr17 | 21575562 | 21576191 | RMER19B     | LTR                       | ERVK      |
| chr17 | 21653731 | 21654132 | .     | .        | .        | .           | .                         | .         |
| chr17 | 24098524 | 24098925 | chr17 | 24098702 | 24098817 | PB1D7       | SINE                      | Alu       |
| chr17 | 24137248 | 24137649 | chr17 | 24137376 | 24137424 | L2a         | LINE                      | L2        |
| chr17 | 24171909 | 24172310 | chr17 | 24171884 | 24171951 | B3A         | SINE                      | B2        |
| chr17 | 24992737 | 24993138 | .     | .        | .        | .           | .                         | .         |

|       |          |          |       |          |          |          |             |                |
|-------|----------|----------|-------|----------|----------|----------|-------------|----------------|
| chr17 | 25779119 | 25779520 | chr17 | 25779431 | 25779577 | B1_Mus1  | SINE        | Alu            |
| chr17 | 26122632 | 26123033 | .     | .        | .        | .        | .           | .              |
| chr17 | 26507943 | 26508344 | .     | .        | .        | .        | .           | .              |
| chr17 | 26651615 | 26652016 | .     | .        | .        | .        | .           | .              |
| chr17 | 26721492 | 26721893 | .     | .        | .        | .        | .           | .              |
| chr17 | 26742510 | 26742911 | chr17 | 26742814 | 26742991 | L2b      | LINE        | L2             |
| chr17 | 26997630 | 26998031 | .     | .        | .        | .        | .           | .              |
| chr17 | 27024938 | 27025339 | chr17 | 27025171 | 27025254 | B3A      | SINE        | B2             |
| chr17 | 27175275 | 27175676 | .     | .        | .        | .        | .           | .              |
| chr17 | 27178004 | 27178405 | chr17 | 27178019 | 27178052 | (G)n     | Simple_repe | Simple_repeat  |
| chr17 | 27178004 | 27178405 | chr17 | 27178321 | 27178420 | ID_B1    | SINE        | B4             |
| chr17 | 27220570 | 27220971 | .     | .        | .        | .        | .           | .              |
| chr17 | 27268396 | 27268797 | .     | .        | .        | .        | .           | .              |
| chr17 | 27278896 | 27279297 | chr17 | 27278920 | 27278966 | GA-rich  | Low_comple  | Low_complexity |
| chr17 | 27441666 | 27442067 | .     | .        | .        | .        | .           | .              |
| chr17 | 27678212 | 27678613 | chr17 | 27678123 | 27678265 | ORR1C2   | LTR         | MaLR           |
| chr17 | 27678212 | 27678613 | chr17 | 27678324 | 27678441 | MLT1J    | LTR         | MaLR           |
| chr17 | 27678212 | 27678613 | chr17 | 27678470 | 27678596 | LTR40a   | LTR         | ERVL           |
| chr17 | 27684158 | 27684559 | chr17 | 27684080 | 27684180 | ID_B1    | SINE        | B4             |
| chr17 | 27936974 | 27937375 | .     | .        | .        | .        | .           | .              |
| chr17 | 28373558 | 28373959 | chr17 | 28373817 | 28373840 | (TG)n    | Simple_repe | Simple_repeat  |
| chr17 | 28902985 | 28903386 | chr17 | 28903002 | 28903095 | MIR      | SINE        | MIR            |
| chr17 | 28902985 | 28903386 | chr17 | 28903200 | 28903272 | CT-rich  | Low_comple  | Low_complexity |
| chr17 | 29003853 | 29004254 | chr17 | 29003871 | 29004112 | MLT1J    | LTR         | MaLR           |
| chr17 | 29003853 | 29004254 | chr17 | 29004147 | 29004209 | ID4      | SINE        | ID             |
| chr17 | 29021101 | 29021502 | chr17 | 29020892 | 29021148 | MTE2a    | LTR         | MaLR           |
| chr17 | 29021101 | 29021502 | chr17 | 29021248 | 29021309 | LTR33A   | LTR         | ERVL           |
| chr17 | 29021101 | 29021502 | chr17 | 29021410 | 29021502 | PB1D10   | SINE        | Alu            |
| chr17 | 29305880 | 29306281 | .     | .        | .        | .        | .           | .              |
| chr17 | 29479986 | 29480387 | chr17 | 29480301 | 29480467 | RSINE1   | SINE        | B4             |
| chr17 | 29980364 | 29980765 | chr17 | 29980266 | 29980429 | B3       | SINE        | B2             |
| chr17 | 29980364 | 29980765 | chr17 | 29980460 | 29980573 | MLT1J    | LTR         | MaLR           |
| chr17 | 31615532 | 31615933 | chr17 | 31615374 | 31615569 | B2_Mm2   | SINE        | B2             |
| chr17 | 32029778 | 32030179 | .     | .        | .        | .        | .           | .              |
| chr17 | 32201940 | 32202341 | chr17 | 32202259 | 32202385 | B1_Mur1  | SINE        | Alu            |
| chr17 | 33925742 | 33926143 | chr17 | 33925769 | 33926177 | L1MCA    | LINE        | L1             |
| chr17 | 34002345 | 34002746 | chr17 | 34002656 | 34002789 | RMER17C  | LTR         | ERVK           |
| chr17 | 34792443 | 34792844 | .     | .        | .        | .        | .           | .              |
| chr17 | 35438856 | 35439257 | .     | .        | .        | .        | .           | .              |
| chr17 | 35834570 | 35834971 | .     | .        | .        | .        | .           | .              |
| chr17 | 35950144 | 35950545 | .     | .        | .        | .        | .           | .              |
| chr17 | 36007495 | 36007896 | .     | .        | .        | .        | .           | .              |
| chr17 | 36368149 | 36368550 | chr17 | 36368068 | 36368205 | B1_Mus2  | SINE        | Alu            |
| chr17 | 39980112 | 39980513 | .     | .        | .        | .        | .           | .              |
| chr17 | 42356787 | 42357188 | chr17 | 42356352 | 42356884 | Lx7      | LINE        | L1             |
| chr17 | 44854914 | 44855315 | .     | .        | .        | .        | .           | .              |
| chr17 | 45817447 | 45817848 | .     | .        | .        | .        | .           | .              |
| chr17 | 45832107 | 45832508 | .     | .        | .        | .        | .           | .              |
| chr17 | 45889584 | 45889985 | .     | .        | .        | .        | .           | .              |
| chr17 | 45935988 | 45936389 | chr17 | 45936326 | 45936394 | (TTCA)n  | Simple_repe | Simple_repeat  |
| chr17 | 45987871 | 45988272 | .     | .        | .        | .        | .           | .              |
| chr17 | 46620376 | 46620777 | .     | .        | .        | .        | .           | .              |
| chr17 | 46650281 | 46650682 | chr17 | 46650187 | 46650337 | B1_Mus1  | SINE        | Alu            |
| chr17 | 46650281 | 46650682 | chr17 | 46650603 | 46650630 | (TGGAn)  | Simple_repe | Simple_repeat  |
| chr17 | 46828270 | 46828671 | chr17 | 46828163 | 46828297 | MT2B     | LTR         | ERVL           |
| chr17 | 46828270 | 46828671 | chr17 | 46828278 | 46828329 | PB1      | SINE        | Alu            |
| chr17 | 46828270 | 46828671 | chr17 | 46828364 | 46828586 | URR1B    | DNA         | MER1_type      |
| chr17 | 46828270 | 46828671 | chr17 | 46828590 | 46828751 | B2_Mm2   | SINE        | B2             |
| chr17 | 47013223 | 47013624 | chr17 | 47013147 | 47013549 | MT2B     | LTR         | ERVL           |
| chr17 | 47016874 | 47017275 | chr17 | 47016907 | 47017124 | ORR1E    | LTR         | MaLR           |
| chr17 | 47016874 | 47017275 | chr17 | 47017210 | 47017314 | B1_Mur1  | SINE        | Alu            |
| chr17 | 47069914 | 47070315 | chr17 | 47069668 | 47070348 | RMER6A   | LTR         | ERVK           |
| chr17 | 47131986 | 47132387 | .     | .        | .        | .        | .           | .              |
| chr17 | 47978917 | 47979318 | .     | .        | .        | .        | .           | .              |
| chr17 | 48495000 | 48495401 | .     | .        | .        | .        | .           | .              |
| chr17 | 53542240 | 53542641 | chr17 | 53542594 | 53542643 | (CAGA)n  | Simple_repe | Simple_repeat  |
| chr17 | 56277230 | 56277631 | .     | .        | .        | .        | .           | .              |
| chr17 | 56405281 | 56405682 | chr17 | 56405237 | 56405419 | B2_Mm2   | SINE        | B2             |
| chr17 | 56405281 | 56405682 | chr17 | 56405436 | 56405578 | RSINE1   | SINE        | B4             |
| chr17 | 56408543 | 56408944 | chr17 | 56408600 | 56408643 | B1_Mus2  | SINE        | Alu            |
| chr17 | 56408543 | 56408944 | chr17 | 56408686 | 56408752 | MLT1J    | LTR         | MaLR           |
| chr17 | 56584776 | 56585177 | chr17 | 56584751 | 56584883 | L1MEf    | LINE        | L1             |
| chr17 | 56646507 | 56646908 | chr17 | 56646478 | 56646520 | (TG)n    | Simple_repe | Simple_repeat  |
| chr17 | 56646507 | 56646908 | chr17 | 56646520 | 56646539 | (CG)n    | Simple_repe | Simple_repeat  |
| chr17 | 57261277 | 57261678 | .     | .        | .        | .        | .           | .              |
| chr17 | 64054389 | 64054790 | .     | .        | .        | .        | .           | .              |
| chr17 | 64062124 | 64062525 | .     | .        | .        | .        | .           | .              |
| chr17 | 64087576 | 64087977 | chr17 | 64087458 | 64087586 | RMER6D   | LTR         | ERVK           |
| chr17 | 64087576 | 64087977 | chr17 | 64087608 | 64088045 | RLTR23   | LTR         | ERV1           |
| chr17 | 65907596 | 65907997 | .     | .        | .        | .        | .           | .              |
| chr17 | 66070695 | 66071096 | .     | .        | .        | .        | .           | .              |
| chr17 | 66859661 | 66860062 | chr17 | 66859876 | 66859907 | (TG)n    | Simple_repe | Simple_repeat  |
| chr17 | 68536998 | 68537399 | .     | .        | .        | .        | .           | .              |
| chr17 | 69770974 | 69771375 | chr17 | 69769883 | 69771061 | L1M4     | LINE        | L1             |
| chr17 | 69770974 | 69771375 | chr17 | 69771200 | 69771262 | L1M4     | LINE        | L1             |
| chr17 | 69770974 | 69771375 | chr17 | 69771262 | 69771442 | B3A      | SINE        | B2             |
| chr17 | 71071634 | 71072035 | .     | .        | .        | .        | .           | .              |
| chr17 | 71078340 | 71078741 | chr17 | 71078388 | 71078741 | Tigger7  | DNA         | MER2_type      |
| chr17 | 71087445 | 71087846 | .     | .        | .        | .        | .           | .              |
| chr17 | 71096064 | 71096465 | chr17 | 71096247 | 71096341 | Charlie9 | DNA         | MER1_type      |
| chr17 | 71186159 | 71186560 | chr17 | 71186088 | 71186541 | Tigger7  | DNA         | MER2_type      |
| chr17 | 71514366 | 71514767 | .     | .        | .        | .        | .           | .              |
| chr17 | 72009005 | 72009406 | .     | .        | .        | .        | .           | .              |
| chr17 | 73424620 | 73425021 | chr17 | 73424292 | 73425577 | L1MB7    | LINE        | L1             |
| chr17 | 73543952 | 73544353 | .     | .        | .        | .        | .           | .              |

|       |          |                |          |                         |             |                |
|-------|----------|----------------|----------|-------------------------|-------------|----------------|
| chr17 | 73602586 | 73602987 chr17 | 73602763 | 73602836 L1MC4a         | LINE        | L1             |
| chr17 | 74438605 | 74439006 chr17 | 74438923 | 74439023 RLTR16         | LTR         | ERVK           |
| chr17 | 75454477 | 75454878       | .        | .                       | .           | .              |
| chr17 | 75510422 | 75510823       | .        | .                       | .           | .              |
| chr17 | 80100216 | 80100617 chr17 | 80100464 | 80100798 MER58B         | DNA         | MER1_type      |
| chr17 | 80145426 | 80145827 chr17 | 80145718 | 80145777 MIRb           | SINE        | MIR            |
| chr17 | 80331963 | 80332364       | .        | .                       | .           | .              |
| chr17 | 82776524 | 82776925 chr17 | 82776515 | 82776901 RMER19B        | LTR         | ERVK           |
| chr17 | 82776524 | 82776925 chr17 | 82776901 | 82776935 (CTG)n         | Simple_repe | Simple_repeat  |
| chr17 | 84272039 | 84272440       | .        | .                       | .           | .              |
| chr17 | 84289058 | 84289459       | .        | .                       | .           | .              |
| chr17 | 84301911 | 84302312       | .        | .                       | .           | .              |
| chr17 | 84378370 | 84378771       | .        | .                       | .           | .              |
| chr17 | 84389780 | 84390181 chr17 | 84389696 | 84389835 MIRb           | SINE        | MIR            |
| chr17 | 84425357 | 84425758 chr17 | 84425362 | 84425386 GC_rich        | Low_comple  | Low_complexity |
| chr17 | 84438820 | 84439221 chr17 | 84438803 | 84438885 ORR1E          | LTR         | MaLR           |
| chr17 | 84438820 | 84439221 chr17 | 84439102 | 84439163 ORR1E          | LTR         | MaLR           |
| chr17 | 84438820 | 84439221 chr17 | 84439188 | 84439360 B3A            | SINE        | B2             |
| chr17 | 84443989 | 84444390       | .        | .                       | .           | .              |
| chr17 | 84483158 | 84483559 chr17 | 84483148 | 84483185 (TG)n          | Simple_repe | Simple_repeat  |
| chr17 | 84483158 | 84483559 chr17 | 84483214 | 84483344 RSINE1         | SINE        | B4             |
| chr17 | 84509272 | 84509673       | .        | .                       | .           | .              |
| chr17 | 84548141 | 84548542       | .        | .                       | .           | .              |
| chr17 | 87560543 | 87560944 chr17 | 87560749 | 87560953 L1ME1          | LINE        | L1             |
| chr17 | 87606169 | 87606570 chr17 | 87606337 | 87606367 (CA)n          | Simple_repe | Simple_repeat  |
| chr17 | 87636436 | 87636837 chr17 | 87636820 | 87636951 MER5B          | DNA         | MER1_type      |
| chr17 | 87647579 | 87647980 chr17 | 87647337 | 87647662 RLTR11A2       | LTR         | ERVK           |
| chr17 | 87647579 | 87647980 chr17 | 87647789 | 87648125 RLTR11A2       | LTR         | ERVK           |
| chr17 | 87701767 | 87702168       | .        | .                       | .           | .              |
| chr17 | 87970794 | 87971195 chr17 | 87970822 | 87970916 MIRb           | SINE        | MIR            |
| chr17 | 88136483 | 88136884 chr17 | 88136492 | 88136633 B3             | SINE        | B2             |
| chr17 | 88136483 | 88136884 chr17 | 88136637 | 88136757 LTR33B         | LTR         | ERVL           |
| chr17 | 88250731 | 88251132       | .        | .                       | .           | .              |
| chr17 | 88594650 | 88595051 chr17 | 88594316 | 88595094 ERVL-B4-int    | LTR         | ERVL           |
| chr17 | 88661864 | 88662265 chr17 | 88661444 | 88661983 L1MB2          | LINE        | L1             |
| chr17 | 88861989 | 88862390       | .        | .                       | .           | .              |
| chr17 | 88908513 | 88908914       | .        | .                       | .           | .              |
| chr18 | 3005632  | 3006033 chr18  | 3005757  | 3005881 RLTR11A         | LTR         | ERVK           |
| chr18 | 3005632  | 3006033 chr18  | 3006013  | 3006125 (GAAA)n         | Simple_repe | Simple_repeat  |
| chr18 | 4522959  | 4523360        | .        | .                       | .           | .              |
| chr18 | 5510158  | 5510559        | .        | .                       | .           | .              |
| chr18 | 13107617 | 13108018       | .        | .                       | .           | .              |
| chr18 | 13114104 | 13114505 chr18 | 13114099 | 13114169 (CAG)n         | Simple_repe | Simple_repeat  |
| chr18 | 14416620 | 14417021       | .        | .                       | .           | .              |
| chr18 | 22516816 | 22517217 chr18 | 22517189 | 22517259 (GA)n          | Simple_repe | Simple_repeat  |
| chr18 | 35911706 | 35912107       | .        | .                       | .           | .              |
| chr18 | 36574665 | 36575066 chr18 | 36574875 | 36575047 B3A            | SINE        | B2             |
| chr18 | 38227492 | 38227893 chr18 | 38227855 | 38227920 GA-rich        | Low_comple  | Low_complexity |
| chr18 | 38376463 | 38376864       | .        | .                       | .           | .              |
| chr18 | 38414542 | 38414943 chr18 | 38414323 | 38414689 MLT1J          | LTR         | MaLR           |
| chr18 | 39826082 | 39826483 chr18 | 39826218 | 39826272 (TG)n          | Simple_repe | Simple_repeat  |
| chr18 | 40467694 | 40468095 chr18 | 40468091 | 40468224 HAL1-3A_MELINE | LINE        | L1             |
| chr18 | 44632166 | 44632567 chr18 | 44632000 | 44632181 B3A            | SINE        | B2             |
| chr18 | 45215530 | 45215931 chr18 | 45215525 | 45215562 MTC            | LTR         | MaLR           |
| chr18 | 45215530 | 45215931 chr18 | 45215562 | 45218559 L1_Mus1        | LINE        | L1             |
| chr18 | 56099050 | 56099451 chr18 | 56099124 | 56099300 GSAT_MM        | Satellite   | Satellite      |
| chr18 | 57947546 | 57947947 chr18 | 57947381 | 57947568 B3A            | SINE        | B2             |
| chr18 | 61051069 | 61051470       | .        | .                       | .           | .              |
| chr18 | 61169854 | 61170255       | .        | .                       | .           | .              |
| chr18 | 61383874 | 61384275       | .        | .                       | .           | .              |
| chr18 | 61801107 | 61801508 chr18 | 61801042 | 61801159 MLT1D          | LTR         | MaLR           |
| chr18 | 65151187 | 65151588 chr18 | 65151252 | 65151459 MLT1J2         | LTR         | MaLR           |
| chr18 | 65151187 | 65151588 chr18 | 65151504 | 65151637 B1_Mur2        | SINE        | Alu            |
| chr18 | 65586952 | 65587353 chr18 | 65587122 | 65587481 7SLRNA         | srpRNA      | srpRNA         |
| chr18 | 66047585 | 66047986 chr18 | 66047702 | 66047887 MLT1N2         | LTR         | MaLR           |
| chr18 | 70152022 | 70152423       | .        | .                       | .           | .              |
| chr18 | 77293649 | 77294050 chr18 | 77293968 | 77294027 CT-rich        | Low_comple  | Low_complexity |
| chr18 | 77469955 | 77470356 chr18 | 77470102 | 77470179 LTR33B         | LTR         | ERVL           |
| chr18 | 77469955 | 77470356 chr18 | 77470278 | 77470321 AT_rich        | Low_comple  | Low_complexity |
| chr18 | 79459569 | 79459970 chr18 | 79459681 | 79459828 LTR33B         | LTR         | ERVL           |
| chr18 | 79459569 | 79459970 chr18 | 79459877 | 79460132 ORR1D2         | LTR         | MaLR           |
| chr18 | 80579357 | 80579758       | .        | .                       | .           | .              |
| chr18 | 80731097 | 80731498       | .        | .                       | .           | .              |
| chr18 | 81894585 | 81894986 chr18 | 81894625 | 81894860 RMER15         | LTR         | ERVL           |
| chr18 | 81941510 | 81941911       | .        | .                       | .           | .              |
| chr18 | 82662173 | 82662574 chr18 | 82662370 | 82662494 MLT1J          | LTR         | MaLR           |
| chr18 | 82662173 | 82662574 chr18 | 82662530 | 82662677 (TC)n          | Simple_repe | Simple_repeat  |
| chr18 | 85050496 | 85050897 chr18 | 85050415 | 85050601 B3             | SINE        | B2             |
| chr18 | 85050496 | 85050897 chr18 | 85050666 | 85050737 ID4            | SINE        | ID             |
| chr18 | 85050496 | 85050897 chr18 | 85050737 | 85050848 B4             | SINE        | B4             |
| chr18 | 88923271 | 88923672 chr18 | 88923135 | 88923345 RLTR40         | LTR         | ERVK           |
| chr19 | 3333985  | 3334386 chr19  | 3333796  | 3334068 B4A             | SINE        | B4             |
| chr19 | 3376915  | 3377316 chr19  | 3376806  | 3377013 B3              | SINE        | B2             |
| chr19 | 4046005  | 4046406 chr19  | 4046250  | 4046375 L1M5            | LINE        | L1             |
| chr19 | 4121079  | 4121480        | .        | .                       | .           | .              |
| chr19 | 4244716  | 4245117 chr19  | 4244279  | 4244769 RMER4B          | LTR         | ERVK           |
| chr19 | 4257497  | 4257898        | .        | .                       | .           | .              |
| chr19 | 4309806  | 4310207 chr19  | 4309790  | 4309811 (A)n            | Simple_repe | Simple_repeat  |
| chr19 | 4309806  | 4310207 chr19  | 4310171  | 4310368 B2_Mm1a         | SINE        | B2             |
| chr19 | 4333738  | 4334139        | .        | .                       | .           | .              |
| chr19 | 5013326  | 5013727 chr19  | 5013267  | 5013505 MTEa            | LTR         | MaLR           |
| chr19 | 5061854  | 5062255 chr19  | 5061820  | 5061982 (TCCA)n         | Simple_repe | Simple_repeat  |
| chr19 | 5345565  | 5345966 chr19  | 5345937  | 5345991 L2b             | LINE        | L2             |
| chr19 | 5431985  | 5432386        | .        | .                       | .           | .              |
| chr19 | 5572433  | 5572834 chr19  | 5572594  | 5572711 RMER15          | LTR         | ERVL           |

|       |          |          |       |          |          |             |             |                |   |
|-------|----------|----------|-------|----------|----------|-------------|-------------|----------------|---|
| chr19 | 5743616  | 5744017  | .     | .        | .        | .           | .           | .              | . |
| chr19 | 5749477  | 5749878  | chr19 | 5749460  | 5749506  | (TG)n       | Simple_repe | Simple_repeat  |   |
| chr19 | 5749477  | 5749878  | chr19 | 5749743  | 5749951  | MIRb        | SINE        | MIR            |   |
| chr19 | 5786957  | 5787358  | chr19 | 5786994  | 5787151  | B2_Mm2      | SINE        | B2             |   |
| chr19 | 5786957  | 5787358  | chr19 | 5787158  | 5787366  | B3          | SINE        | B2             |   |
| chr19 | 5794694  | 5795095  | chr19 | 5794384  | 5794789  | MTA_Mm      | LTR         | MaLR           |   |
| chr19 | 5945131  | 5945532  | .     | .        | .        | .           | .           | .              |   |
| chr19 | 5956201  | 5956602  | .     | .        | .        | .           | .           | .              |   |
| chr19 | 6297632  | 6298033  | .     | .        | .        | .           | .           | .              |   |
| chr19 | 6452177  | 6452578  | chr19 | 6452566  | 6452633  | (TC)n       | Simple_repe | Simple_repeat  |   |
| chr19 | 6476895  | 6477296  | chr19 | 6476829  | 6477000  | B3          | SINE        | B2             |   |
| chr19 | 6476895  | 6477296  | chr19 | 6477002  | 6477169  | L1MB3       | LINE        | L1             |   |
| chr19 | 6519476  | 6519877  | .     | .        | .        | .           | .           | .              |   |
| chr19 | 6525383  | 6525784  | chr19 | 6525330  | 6525402  | MLT1J1      | LTR         | MaLR           |   |
| chr19 | 6525383  | 6525784  | chr19 | 6525549  | 6525628  | MLT1J1      | LTR         | MaLR           |   |
| chr19 | 6525383  | 6525784  | chr19 | 6525663  | 6525809  | B1_Mus1     | SINE        | Alu            |   |
| chr19 | 6529573  | 6529974  | .     | .        | .        | .           | .           | .              |   |
| chr19 | 6925967  | 6926368  | chr19 | 6925956  | 6926103  | B4          | SINE        | B4             |   |
| chr19 | 6925967  | 6926368  | chr19 | 6925976  | 6926104  | B1_Mus1     | SINE        | Alu            |   |
| chr19 | 6925967  | 6926368  | chr19 | 6926104  | 6926152  | GA-rich     | Low_comple  | Low_complexity |   |
| chr19 | 7025212  | 7025613  | .     | .        | .        | .           | .           | .              |   |
| chr19 | 7163591  | 7163992  | .     | .        | .        | .           | .           | .              |   |
| chr19 | 7376351  | 7376752  | chr19 | 7376718  | 7376749  | AT_rich     | Low_comple  | Low_complexity |   |
| chr19 | 9057843  | 9058244  | .     | .        | .        | .           | .           | .              |   |
| chr19 | 9135720  | 9136121  | .     | .        | .        | .           | .           | .              |   |
| chr19 | 9985882  | 9986283  | chr19 | 9986242  | 9986444  | URR1A       | DNA         | MER1_type      |   |
| chr19 | 10029142 | 10029543 | .     | .        | .        | .           | .           | .              |   |
| chr19 | 10052807 | 10053208 | chr19 | 10053167 | 10053218 | (CA)n       | Simple_repe | Simple_repeat  |   |
| chr19 | 10184519 | 10184920 | chr19 | 10184361 | 10184533 | B4A         | SINE        | B4             |   |
| chr19 | 10184519 | 10184920 | chr19 | 10184787 | 10185063 | L1Md_T      | LINE        | L1             |   |
| chr19 | 10340943 | 10341344 | .     | .        | .        | .           | .           | .              |   |
| chr19 | 10354230 | 10354631 | chr19 | 10354588 | 10354715 | RSINE1      | SINE        | B4             |   |
| chr19 | 10636476 | 10636877 | chr19 | 10636790 | 10636812 | (TTTG)n     | Simple_repe | Simple_repeat  |   |
| chr19 | 11060381 | 11060782 | .     | .        | .        | .           | .           | .              |   |
| chr19 | 14316633 | 14317034 | chr19 | 14316788 | 14316873 | LTR33B      | LTR         | ERV_L          |   |
| chr19 | 16446422 | 16446823 | .     | .        | .        | .           | .           | .              |   |
| chr19 | 16667837 | 16668238 | chr19 | 16667845 | 16668009 | MER58A      | DNA         | MER1_type      |   |
| chr19 | 16667837 | 16668238 | chr19 | 16668071 | 16668420 | MLT1J2      | LTR         | MaLR           |   |
| chr19 | 17214841 | 17215242 | .     | .        | .        | .           | .           | .              |   |
| chr19 | 17331405 | 17331806 | .     | .        | .        | .           | .           | .              |   |
| chr19 | 18736189 | 18736590 | chr19 | 18736576 | 18736612 | polypyrimid | Low_comple  | Low_complexity |   |
| chr19 | 18840918 | 18841319 | chr19 | 18840772 | 18841114 | ORR1E       | LTR         | MaLR           |   |
| chr19 | 18964657 | 18965058 | .     | .        | .        | .           | .           | .              |   |
| chr19 | 19321638 | 19322039 | chr19 | 19322003 | 19322106 | MIR         | SINE        | MIR            |   |
| chr19 | 21415036 | 21415437 | chr19 | 21415234 | 21415463 | MLT1K       | LTR         | MaLR           |   |
| chr19 | 21894078 | 21894479 | chr19 | 21893993 | 21894109 | PB1D9       | SINE        | Alu            |   |
| chr19 | 21894078 | 21894479 | chr19 | 21894305 | 21894445 | B4A         | SINE        | B4             |   |
| chr19 | 21937981 | 21938382 | .     | .        | .        | .           | .           | .              |   |
| chr19 | 22064729 | 22065130 | .     | .        | .        | .           | .           | .              |   |
| chr19 | 22991897 | 22992298 | chr19 | 22991817 | 22991899 | MIRc        | SINE        | MIR            |   |
| chr19 | 22991897 | 22992298 | chr19 | 22992071 | 22992302 | URR1B       | DNA         | MER1_type      |   |
| chr19 | 23109794 | 23110195 | .     | .        | .        | .           | .           | .              |   |
| chr19 | 23128951 | 23129352 | chr19 | 23128921 | 23129115 | ID_B1       | SINE        | B4             |   |
| chr19 | 23210090 | 23210491 | .     | .        | .        | .           | .           | .              |   |
| chr19 | 23431748 | 23432149 | chr19 | 23431912 | 23432083 | GSAT_MM     | Satellite   | Satellite      |   |
| chr19 | 23564222 | 23564623 | chr19 | 23564067 | 23564501 | Zaphod      | DNA         | Tip100         |   |
| chr19 | 24271843 | 24272244 | chr19 | 24272211 | 24272383 | B3A         | SINE        | B2             |   |
| chr19 | 24358723 | 24359124 | chr19 | 24358589 | 24358725 | Lx8         | LINE        | L1             |   |
| chr19 | 24358723 | 24359124 | chr19 | 24358874 | 24359032 | MER20       | DNA         | MER1_type      |   |
| chr19 | 24375469 | 24375870 | chr19 | 24375678 | 24375866 | MLT1C       | LTR         | MaLR           |   |
| chr19 | 24400129 | 24400530 | chr19 | 24400106 | 24400167 | ID4_        | SINE        | ID             |   |
| chr19 | 24795043 | 24795444 | .     | .        | .        | .           | .           | .              |   |
| chr19 | 27426274 | 27426675 | chr19 | 27425905 | 27426472 | MLT2B3      | LTR         | ERV_L          |   |
| chr19 | 27426274 | 27426675 | chr19 | 27426472 | 27426631 | Charlie5    | DNA         | MER1_type      |   |
| chr19 | 27426274 | 27426675 | chr19 | 27426651 | 27426707 | (TATG)n     | Simple_repe | Simple_repeat  |   |
| chr19 | 28358158 | 28358559 | chr19 | 28358506 | 28358890 | MER121      | Unknown     | Unknown        |   |
| chr19 | 28723314 | 28723715 | chr19 | 28723657 | 28724263 | MER119      | DNA         | MER1_type      |   |
| chr19 | 28888195 | 28888596 | .     | .        | .        | .           | .           | .              |   |
| chr19 | 29715570 | 29715971 | .     | .        | .        | .           | .           | .              |   |
| chr19 | 29731525 | 29731926 | chr19 | 29731878 | 29732093 | B3          | SINE        | B2             |   |
| chr19 | 29924424 | 29924825 | chr19 | 29924308 | 29924568 | B4A         | SINE        | B4             |   |
| chr19 | 29991829 | 29992230 | .     | .        | .        | .           | .           | .              |   |
| chr19 | 30181982 | 30182383 | .     | .        | .        | .           | .           | .              |   |
| chr19 | 30392247 | 30392648 | chr19 | 30392347 | 30392510 | RLTR15      | LTR         | ERV_K          |   |
| chr19 | 33099892 | 33100293 | chr19 | 33100214 | 33100552 | GA-rich     | Low_comple  | Low_complexity |   |
| chr19 | 36203713 | 36204114 | .     | .        | .        | .           | .           | .              |   |
| chr19 | 36571541 | 36571942 | .     | .        | .        | .           | .           | .              |   |
| chr19 | 36740121 | 36740522 | .     | .        | .        | .           | .           | .              |   |
| chr19 | 37252355 | 37252756 | .     | .        | .        | .           | .           | .              |   |
| chr19 | 37563367 | 37563768 | .     | .        | .        | .           | .           | .              |   |
| chr19 | 37582429 | 37582830 | chr19 | 37582521 | 37582660 | B1_Mur1     | SINE        | Alu            |   |
| chr19 | 38034535 | 38034936 | .     | .        | .        | .           | .           | .              |   |
| chr19 | 38099694 | 38100095 | chr19 | 38099679 | 38099763 | MIR         | SINE        | MIR            |   |
| chr19 | 38099694 | 38100095 | chr19 | 38099909 | 38099942 | (G)n        | Simple_repe | Simple_repeat  |   |
| chr19 | 38333026 | 38333427 | .     | .        | .        | .           | .           | .              |   |
| chr19 | 41368792 | 41369193 | chr19 | 41368868 | 41369081 | RLTR15      | LTR         | ERV_K          |   |
| chr19 | 41931880 | 41932281 | .     | .        | .        | .           | .           | .              |   |
| chr19 | 42091252 | 42091653 | .     | .        | .        | .           | .           | .              |   |
| chr19 | 43991064 | 43991465 | .     | .        | .        | .           | .           | .              |   |
| chr19 | 44096051 | 44096452 | .     | .        | .        | .           | .           | .              |   |
| chr19 | 44300200 | 44300601 | chr19 | 44300220 | 44300712 | RLTR19A     | LTR         | ERV_K          |   |
| chr19 | 44355316 | 44355717 | .     | .        | .        | .           | .           | .              |   |
| chr19 | 44386450 | 44386851 | .     | .        | .        | .           | .           | .              |   |
| chr19 | 45129696 | 45130097 | .     | .        | .        | .           | .           | .              |   |
| chr19 | 45557958 | 45558359 | chr19 | 45557958 | 45558036 | T-rich      | Low_comple  | Low_complexity |   |



|       |          |          |       |          |          |                 |             |                |
|-------|----------|----------|-------|----------|----------|-----------------|-------------|----------------|
| chr19 | 45557958 | 45558359 | chr19 | 45558052 | 45558198 | B1F             | SINE        | Alu            |
| chr19 | 45557958 | 45558359 | chr19 | 45558352 | 45558512 | RSINE1          | SINE        | B4             |
| chr19 | 45724307 | 45724708 | chr19 | 45724315 | 45724431 | B1_Mus1         | SINE        | Alu            |
| chr19 | 45724307 | 45724708 | chr19 | 45724562 | 45724744 | B2_Mm2          | SINE        | B2             |
| chr19 | 46089038 | 46089439 | chr19 | 46088987 | 46089148 | B3A             | SINE        | B2             |
| chr19 | 46089038 | 46089439 | chr19 | 46089134 | 46089188 | B1F             | SINE        | Alu            |
| chr19 | 47291160 | 47291561 | chr19 | 47290993 | 47291181 | B2_Mm1a         | SINE        | B2             |
| chr19 | 47291160 | 47291561 | chr19 | 47291181 | 47291223 | ID_B1           | SINE        | B4             |
| chr19 | 47291160 | 47291561 | chr19 | 47291365 | 47291449 | ID_B1           | SINE        | B4             |
| chr19 | 47291160 | 47291561 | chr19 | 47291529 | 47291634 | B3              | SINE        | B2             |
| chr19 | 47338833 | 47339234 | chr19 | 47339120 | 47339248 | MIR3            | SINE        | MIR            |
| chr19 | 47403577 | 47403978 | chr19 | 47403728 | 47404092 | RMER1C          | Other       | Other          |
| chr19 | 47421214 | 47421615 | .     | .        | .        | .               | .           | .              |
| chr19 | 47583189 | 47583590 | .     | .        | .        | .               | .           | .              |
| chr19 | 47960975 | 47961376 | chr19 | 47961050 | 47961093 | (AGGGGG)n       | Simple_repe | Simple_repeat  |
| chr19 | 47960975 | 47961376 | chr19 | 47961096 | 47961142 | (GAAA)n         | Simple_repe | Simple_repeat  |
| chr19 | 53141337 | 53141738 | .     | .        | .        | .               | .           | .              |
| chr19 | 53495515 | 53495916 | .     | .        | .        | .               | .           | .              |
| chr19 | 53626663 | 53627064 | .     | .        | .        | .               | .           | .              |
| chr19 | 53629564 | 53629965 | .     | .        | .        | .               | .           | .              |
| chr19 | 53653465 | 53653866 | chr19 | 53653444 | 53653498 | RSINE1          | SINE        | B4             |
| chr19 | 53653465 | 53653866 | chr19 | 53653755 | 53653876 | B1F             | SINE        | Alu            |
| chr19 | 53806161 | 53806562 | chr19 | 53806220 | 53806277 | (CA)n           | Simple_repe | Simple_repeat  |
| chr19 | 53875054 | 53875455 | chr19 | 53875009 | 53875082 | (TG)n           | Simple_repe | Simple_repeat  |
| chr19 | 54244944 | 54245345 | .     | .        | .        | .               | .           | .              |
| chr19 | 55514933 | 55515334 | chr19 | 55515025 | 55515234 | B3A             | SINE        | B2             |
| chr19 | 55788450 | 55788851 | .     | .        | .        | .               | .           | .              |
| chr19 | 56096803 | 56097204 | .     | .        | .        | .               | .           | .              |
| chr19 | 56295213 | 56295614 | .     | .        | .        | .               | .           | .              |
| chr19 | 57347789 | 57348190 | chr19 | 57347930 | 57347988 | RMER15          | LTR         | ERV1           |
| chr19 | 57432825 | 57433226 | chr19 | 57432807 | 57433136 | ORR1E           | LTR         | MaLR           |
| chr19 | 58179052 | 58179453 | .     | .        | .        | .               | .           | .              |
| chr19 | 58598180 | 58598581 | chr19 | 58598338 | 58598377 | (TG)n           | Simple_repe | Simple_repeat  |
| chr19 | 58598180 | 58598581 | chr19 | 58598387 | 58598490 | RSINE1          | SINE        | B4             |
| chr19 | 58625069 | 58625470 | .     | .        | .        | .               | .           | .              |
| chr19 | 59053146 | 59053547 | .     | .        | .        | .               | .           | .              |
| chr19 | 59920179 | 59920580 | chr19 | 59920122 | 59920193 | CT-rich         | Low_comple  | Low_complexity |
| chr19 | 59974135 | 59974536 | chr19 | 59974124 | 59974200 | G-rich          | Low_comple  | Low_complexity |
| chr19 | 60539904 | 60540305 | .     | .        | .        | .               | .           | .              |
| chr19 | 60571725 | 60572126 | chr19 | 60571744 | 60571968 | RMER15          | LTR         | ERV1           |
| chr19 | 61275481 | 61275882 | chr19 | 61275773 | 61276286 | MURVY-LTR       | LTR         | ERV1           |
| chr19 | 61299605 | 61300006 | chr19 | 61299855 | 61299963 | RLTR11A2        | LTR         | ERVK           |
| chr19 | 61299605 | 61300006 | chr19 | 61299983 | 61300082 | B2_Mm2          | SINE        | B2             |
| chr19 | 61340134 | 61340535 | chr19 | 61339804 | 61340389 | RLTR33          | LTR         | ERVK           |
| chr19 | 61340134 | 61340535 | chr19 | 61340397 | 61340442 | (CAGA)n         | Simple_repe | Simple_repeat  |
| chr19 | 61340134 | 61340535 | chr19 | 61340445 | 61340495 | (CA)n           | Simple_repe | Simple_repeat  |
| chr19 | 61341249 | 61341650 | chr19 | 61341556 | 61341667 | RLTR11A2        | LTR         | ERVK           |
| chr2  | 3370381  | 3370782  | .     | .        | .        | .               | .           | .              |
| chr2  | 3463775  | 3464176  | chr2  | 3463879  | 3463981  | MIR             | SINE        | MIR            |
| chr2  | 4181730  | 4182131  | .     | .        | .        | .               | .           | .              |
| chr2  | 4366832  | 4367233  | .     | .        | .        | .               | .           | .              |
| chr2  | 5300182  | 5300583  | chr2  | 5300087  | 5300422  | LSU-rRNA_H:rRNA |             | rRNA           |
| chr2  | 5300182  | 5300583  | chr2  | 5300465  | 5300700  | B4              | SINE        | B4             |
| chr2  | 6141216  | 6141617  | chr2  | 6141080  | 6141241  | RMER1B          | Other       | Other          |
| chr2  | 6300781  | 6301182  | chr2  | 6300734  | 6300917  | MIR             | SINE        | MIR            |
| chr2  | 7036936  | 7037337  | .     | .        | .        | .               | .           | .              |
| chr2  | 8675864  | 8676265  | .     | .        | .        | .               | .           | .              |
| chr2  | 10171869 | 10172270 | .     | .        | .        | .               | .           | .              |
| chr2  | 12686073 | 12686474 | chr2  | 12686168 | 12686194 | (TG)n           | Simple_repe | Simple_repeat  |
| chr2  | 12686073 | 12686474 | chr2  | 12686194 | 12686240 | (GA)n           | Simple_repe | Simple_repeat  |
| chr2  | 16604536 | 16604937 | chr2  | 16604694 | 16604892 | 7SLRNA          | srpRNA      | srpRNA         |
| chr2  | 16604536 | 16604937 | chr2  | 16604893 | 16604936 | (CAAA)n         | Simple_repe | Simple_repeat  |
| chr2  | 19501662 | 19502063 | .     | .        | .        | .               | .           | .              |
| chr2  | 22600198 | 22600599 | chr2  | 22600039 | 22600528 | LSU-rRNA_H:rRNA |             | rRNA           |
| chr2  | 22600198 | 22600599 | chr2  | 22600594 | 22600665 | LSU-rRNA_H:rRNA |             | rRNA           |
| chr2  | 22667002 | 22667403 | .     | .        | .        | .               | .           | .              |
| chr2  | 2599831  | 26000232 | .     | .        | .        | .               | .           | .              |
| chr2  | 26349858 | 26350259 | chr2  | 26349725 | 26349991 | B4A             | SINE        | B4             |
| chr2  | 26349858 | 26350259 | chr2  | 26350004 | 26350052 | (CA)n           | Simple_repe | Simple_repeat  |
| chr2  | 27297883 | 27298284 | chr2  | 27297709 | 27297925 | C-rich          | Low_comple  | Low_complexity |
| chr2  | 27395517 | 27395918 | .     | .        | .        | .               | .           | .              |
| chr2  | 27630121 | 27630522 | .     | .        | .        | .               | .           | .              |
| chr2  | 27691636 | 27692037 | .     | .        | .        | .               | .           | .              |
| chr2  | 29526097 | 29526498 | chr2  | 29525960 | 29526141 | B3A             | SINE        | B2             |
| chr2  | 29526097 | 29526498 | chr2  | 29526142 | 29526189 | B1_Mus2         | SINE        | Alu            |
| chr2  | 30297228 | 30297629 | .     | .        | .        | .               | .           | .              |
| chr2  | 30327309 | 30327710 | chr2  | 30327587 | 30327608 | GC-rich         | Low_comple  | Low_complexity |
| chr2  | 30327309 | 30327710 | chr2  | 30327615 | 30327671 | G-rich          | Low_comple  | Low_complexity |
| chr2  | 30351294 | 30351695 | .     | .        | .        | .               | .           | .              |
| chr2  | 30409298 | 30409699 | chr2  | 30409422 | 30409590 | MLT1J1          | LTR         | MaLR           |
| chr2  | 30446368 | 30446769 | chr2  | 30446223 | 30446372 | B1_Mur3         | SINE        | Alu            |
| chr2  | 30446368 | 30446769 | chr2  | 30446505 | 30446764 | MLT1J2          | LTR         | MaLR           |
| chr2  | 30457051 | 30457452 | chr2  | 30457186 | 30457610 | MLT1F           | LTR         | MaLR           |
| chr2  | 30555248 | 30555649 | chr2  | 30555342 | 30555541 | MLT1J           | LTR         | MaLR           |
| chr2  | 30572851 | 30573252 | chr2  | 30572898 | 30573266 | MER115          | DNA         | Tip100         |
| chr2  | 30638800 | 30639201 | chr2  | 30638945 | 30639087 | MLT1J           | LTR         | MaLR           |
| chr2  | 30638800 | 30639201 | chr2  | 30639100 | 30639122 | (CA)n           | Simple_repe | Simple_repeat  |
| chr2  | 30638800 | 30639201 | chr2  | 30639122 | 30639156 | GC-rich         | Low_comple  | Low_complexity |
| chr2  | 30754990 | 30755391 | chr2  | 30755390 | 30755515 | B1F1            | SINE        | Alu            |
| chr2  | 31094870 | 31095271 | chr2  | 31094870 | 31094937 | (CGT)n          | Simple_repe | Simple_repeat  |
| chr2  | 31094870 | 31095271 | chr2  | 31094972 | 31095245 | MTEa            | LTR         | MaLR           |
| chr2  | 31112084 | 31112485 | .     | .        | .        | .               | .           | .              |
| chr2  | 31153342 | 31153743 | chr2  | 31153529 | 31153619 | MLT1J           | LTR         | MaLR           |
| chr2  | 31322955 | 31323356 | chr2  | 31323085 | 31323255 | ID_B1           | SINE        | B4             |
| chr2  | 31322955 | 31323356 | chr2  | 31323255 | 31323318 | (CAGCC)n        | Simple_repe | Simple_repeat  |

|      |           |           |      |           |           |            |             |                |
|------|-----------|-----------|------|-----------|-----------|------------|-------------|----------------|
| chr2 | 31322955  | 31323356  | chr2 | 31323326  | 31323526  | L1MC       | LINE        | L1             |
| chr2 | 31405947  | 31406348  | chr2 | 31406092  | 31406361  | MLT1J2     | LTR         | MaLR           |
| chr2 | 31626299  | 31626700  |      |           |           |            |             |                |
| chr2 | 32198636  | 32199037  |      |           |           |            |             |                |
| chr2 | 32713242  | 32713643  | chr2 | 32713492  | 32713538  | (TC)n      | Simple_repe | Simple_repeat  |
| chr2 | 32713242  | 32713643  | chr2 | 32713538  | 32713625  | B1_Mm      | SINE        | Alu            |
| chr2 | 32718803  | 32719204  | chr2 | 32718923  | 32719257  | L1ME2      | LINE        | L1             |
| chr2 | 32718803  | 32719204  | chr2 | 32718651  | 32718866  | ID_B1      | SINE        | B4             |
| chr2 | 32736507  | 32736908  |      |           |           |            |             |                |
| chr2 | 32822443  | 32822844  |      |           |           |            |             |                |
| chr2 | 33010195  | 33010596  |      |           |           |            |             |                |
| chr2 | 33539641  | 33540042  | chr2 | 33539554  | 33539756  | ID_B1      | SINE        | B4             |
| chr2 | 33539641  | 33540042  | chr2 | 33539759  | 33539895  | PB1        | SINE        | Alu            |
| chr2 | 33841930  | 33842331  | chr2 | 33841952  | 33841992  | (CCCCCA)n  | Simple_repe | Simple_repeat  |
| chr2 | 34262197  | 34262598  |      |           |           |            |             |                |
| chr2 | 34657502  | 34657903  | chr2 | 34657380  | 34657528  | B1_Mus1    | SINE        | Alu            |
| chr2 | 35090542  | 35090943  | chr2 | 35090857  | 35090912  | L2c        | LINE        | L2             |
| chr2 | 35334060  | 35334461  | chr2 | 35333997  | 35334147  | B1F        | SINE        | Alu            |
| chr2 | 35334060  | 35334461  | chr2 | 35334289  | 35334365  | (GA)n      | Simple_repe | Simple_repeat  |
| chr2 | 36080120  | 36080521  | chr2 | 36080239  | 36080343  | MLT1J2     | LTR         | MaLR           |
| chr2 | 36103436  | 36103837  | chr2 | 36103210  | 36103851  | MER44D     | DNA         | MER2_type      |
| chr2 | 36114898  | 36115299  |      |           |           |            |             |                |
| chr2 | 38273458  | 38273859  | chr2 | 38273439  | 38273630  | ID_B1      | SINE        | B4             |
| chr2 | 38273458  | 38273859  | chr2 | 38273842  | 38273853  | B1_Mur4    | SINE        | Alu            |
| chr2 | 38273458  | 38273859  | chr2 | 38273853  | 38273880  | (TTTG)n    | Simple_repe | Simple_repeat  |
| chr2 | 38401725  | 38402126  |      |           |           |            |             |                |
| chr2 | 38781787  | 38782188  | chr2 | 38781878  | 38781914  | GC_rich    | Low_comple  | Low_complexity |
| chr2 | 38781787  | 38782188  | chr2 | 38782102  | 38782134  | AT_rich    | Low_comple  | Low_complexity |
| chr2 | 38842097  | 38842498  |      |           |           |            |             |                |
| chr2 | 44824690  | 44825091  |      |           |           |            |             |                |
| chr2 | 44832614  | 44833015  |      |           |           |            |             |                |
| chr2 | 46298431  | 46298832  |      |           |           |            |             |                |
| chr2 | 49589505  | 49589906  |      |           |           |            |             |                |
| chr2 | 50542762  | 50543163  |      |           |           |            |             |                |
| chr2 | 59438976  | 59439377  | chr2 | 59439036  | 59439233  | LTR50      | LTR         | ERV1           |
| chr2 | 59535213  | 59535614  |      |           |           |            |             |                |
| chr2 | 60526942  | 60527343  | chr2 | 60526898  | 60526949  | (TG)n      | Simple_repe | Simple_repeat  |
| chr2 | 60538027  | 60538428  |      |           |           |            |             |                |
| chr2 | 60778442  | 60778843  |      |           |           |            |             |                |
| chr2 | 64877996  | 64878397  | chr2 | 64877953  | 64878000  | (GA)n      | Simple_repe | Simple_repeat  |
| chr2 | 64877996  | 64878397  | chr2 | 64878000  | 64878231  | RLTR23     | LTR         | ERV1           |
| chr2 | 65240141  | 65240542  | chr2 | 65240214  | 65240555  | RLTR15     | LTR         | ERVK           |
| chr2 | 65321507  | 65321908  |      |           |           |            |             |                |
| chr2 | 65560596  | 65560997  | chr2 | 65560879  | 65560905  | (CAAA)n    | Simple_repe | Simple_repeat  |
| chr2 | 65862127  | 65862528  |      |           |           |            |             |                |
| chr2 | 68753811  | 68754212  | chr2 | 68753819  | 68754069  | RLTR42     | LTR         | ERVK           |
| chr2 | 68821520  | 68821921  | chr2 | 68821687  | 68821898  | ID_B1      | SINE        | B4             |
| chr2 | 71337347  | 71337748  |      |           |           |            |             |                |
| chr2 | 71380605  | 71381006  | chr2 | 71380857  | 71380901  | (TG)n      | Simple_repe | Simple_repeat  |
| chr2 | 71427212  | 71427613  |      |           |           |            |             |                |
| chr2 | 71481942  | 71482343  | chr2 | 71481813  | 71481980  | L1MB3      | LINE        | L1             |
| chr2 | 71481942  | 71482343  | chr2 | 71481985  | 71482007  | AT_rich    | Low_comple  | Low_complexity |
| chr2 | 71481942  | 71482343  | chr2 | 71482245  | 71482301  | (CA)n      | Simple_repe | Simple_repeat  |
| chr2 | 71916040  | 71916441  | chr2 | 71915905  | 71916115  | ID_B1      | SINE        | B4             |
| chr2 | 72719610  | 72720011  | chr2 | 72719914  | 72720056  | MYSERV16_1 | LTR         | ERVK           |
| chr2 | 72833629  | 72834030  | chr2 | 72833765  | 72833886  | LTR88c     | LTR         | Genie?         |
| chr2 | 73423476  | 73423877  | chr2 | 73423566  | 73423989  | RMER10B    | LTR         | ERV1           |
| chr2 | 73431150  | 73431551  |      |           |           |            |             |                |
| chr2 | 74129412  | 74129813  | chr2 | 74129350  | 74129508  | MIRb       | SINE        | MIR            |
| chr2 | 74129412  | 74129813  | chr2 | 74129650  | 74129876  | MLT1J2     | LTR         | MaLR           |
| chr2 | 75601137  | 75601538  | chr2 | 75601097  | 75601252  | L1ME3A     | LINE        | L1             |
| chr2 | 75606232  | 75606633  | chr2 | 75606162  | 75606342  | L1MB8      | LINE        | L1             |
| chr2 | 81040597  | 81040998  | chr2 | 81039863  | 81040866  | Lx8        | LINE        | L1             |
| chr2 | 84305052  | 84305453  |      |           |           |            |             |                |
| chr2 | 84322056  | 84322457  | chr2 | 84321951  | 84322220  | RLTR18     | LTR         | ERVK           |
| chr2 | 84322056  | 84322457  | chr2 | 84322205  | 84322221  | RLTR42     | LTR         | ERVK           |
| chr2 | 84322056  | 84322457  | chr2 | 84322221  | 84322245  | (CA)n      | Simple_repe | Simple_repeat  |
| chr2 | 84322056  | 84322457  | chr2 | 84322245  | 84322299  | RLTR42     | LTR         | ERVK           |
| chr2 | 84322056  | 84322457  | chr2 | 84322400  | 84322436  | AT_rich    | Low_comple  | Low_complexity |
| chr2 | 84660099  | 84660500  |      |           |           |            |             |                |
| chr2 | 84700116  | 84700517  |      |           |           |            |             |                |
| chr2 | 84729560  | 84729961  | chr2 | 84729667  | 84729749  | L2c        | LINE        | L2             |
| chr2 | 90519353  | 90519754  |      |           |           |            |             |                |
| chr2 | 91357428  | 91357829  | chr2 | 91357450  | 91357502  | ID4        | SINE        | ID             |
| chr2 | 91892930  | 91893331  | chr2 | 91893151  | 91893771  | RLTR18     | LTR         | ERVK           |
| chr2 | 94018935  | 94019336  |      |           |           |            |             |                |
| chr2 | 98502712  | 98503113  | chr2 | 98502625  | 98502983  | SYNREP_MM  | Satellite   | Satellite      |
| chr2 | 98502712  | 98503113  | chr2 | 98502984  | 98503150  | GSAT_MM    | Satellite   | Satellite      |
| chr2 | 98503853  | 98504254  | chr2 | 98503798  | 98504248  | GSAT_MM    | Satellite   | Satellite      |
| chr2 | 98506960  | 98507361  | chr2 | 98506701  | 98507489  | GSAT_MM    | Satellite   | Satellite      |
| chr2 | 102822068 | 102822469 | chr2 | 102822047 | 102822424 | Lx8        | LINE        | L1             |
| chr2 | 103510263 | 103510664 | chr2 | 103510220 | 103510426 | MIRb       | SINE        | MIR            |
| chr2 | 103527181 | 103527582 |      |           |           |            |             |                |
| chr2 | 105939838 | 105940239 | chr2 | 105939800 | 105940161 | RLTR12B    | LTR         | ERVK           |
| chr2 | 109799298 | 109799699 |      |           |           |            |             |                |
| chr2 | 112043094 | 112043495 | chr2 | 112042399 | 112044116 | Lx9        | LINE        | L1             |
| chr2 | 112283686 | 112284087 |      |           |           |            |             |                |
| chr2 | 113494831 | 113495232 |      |           |           |            |             |                |
| chr2 | 113678784 | 113679185 |      |           |           |            |             |                |
| chr2 | 113726219 | 113726620 |      |           |           |            |             |                |
| chr2 | 116844879 | 116845280 |      |           |           |            |             |                |
| chr2 | 117272655 | 117273056 |      |           |           |            |             |                |
| chr2 | 117664043 | 117664444 |      |           |           |            |             |                |
| chr2 | 120958681 | 120959082 | chr2 | 120958998 | 120959167 | RSINE1     | SINE        | B4             |
| chr2 | 121401527 | 121401928 |      |           |           |            |             |                |

|      |           |           |      |           |           |             |             |                |   |
|------|-----------|-----------|------|-----------|-----------|-------------|-------------|----------------|---|
| chr2 | 121447135 | 121447536 | .    | .         | .         | .           | .           | .              | . |
| chr2 | 121454078 | 121454479 | .    | .         | .         | .           | .           | .              | . |
| chr2 | 121997975 | 121998376 | chr2 | 121997946 | 121998094 | B1_Mur3     | SINE        | Alu            | . |
| chr2 | 121997975 | 121998376 | chr2 | 121998223 | 121998391 | (CA)n       | Simple_repe | Simple_repeat  | . |
| chr2 | 122153776 | 122154177 | chr2 | 122154042 | 122154262 | MIRb        | SINE        | MIR            | . |
| chr2 | 122204296 | 122204697 | .    | .         | .         | .           | .           | .              | . |
| chr2 | 122507398 | 122507799 | .    | .         | .         | .           | .           | .              | . |
| chr2 | 122530307 | 122530708 | .    | .         | .         | .           | .           | .              | . |
| chr2 | 122534871 | 122535272 | chr2 | 122534973 | 122535175 | B3          | SINE        | B2             | . |
| chr2 | 122534871 | 122535272 | chr2 | 122535193 | 122535294 | PB1         | SINE        | Alu            | . |
| chr2 | 124431052 | 124431453 | .    | .         | .         | .           | .           | .              | . |
| chr2 | 124566447 | 124566848 | chr2 | 124566421 | 124566563 | MLT1H       | LTR         | MaLR           | . |
| chr2 | 125127941 | 125128342 | chr2 | 125127924 | 125128083 | MER5A       | DNA         | MER1_type      | . |
| chr2 | 126057328 | 126057729 | chr2 | 126057386 | 126057411 | AT_rich     | Low_comple  | Low_complexity | . |
| chr2 | 126057328 | 126057729 | chr2 | 126057422 | 126057832 | Lx5         | LINE        | L1             | . |
| chr2 | 126189154 | 126189555 | .    | .         | .         | .           | .           | .              | . |
| chr2 | 126962629 | 126963030 | .    | .         | .         | .           | .           | .              | . |
| chr2 | 127509219 | 127509620 | .    | .         | .         | .           | .           | .              | . |
| chr2 | 128066290 | 128066691 | .    | .         | .         | .           | .           | .              | . |
| chr2 | 131030203 | 131030604 | .    | .         | .         | .           | .           | .              | . |
| chr2 | 131212022 | 131212423 | chr2 | 131211910 | 131212131 | B4          | SINE        | B4             | . |
| chr2 | 131212022 | 131212423 | chr2 | 131212415 | 131212498 | MIRc        | SINE        | MIR            | . |
| chr2 | 131218547 | 131218948 | chr2 | 131218269 | 131218565 | ORR1A2      | LTR         | MaLR           | . |
| chr2 | 131910145 | 131910546 | .    | .         | .         | .           | .           | .              | . |
| chr2 | 132149343 | 132149744 | chr2 | 132149159 | 132149470 | MTE2a       | LTR         | MaLR           | . |
| chr2 | 132149343 | 132149744 | chr2 | 132149725 | 132149758 | (TC)n       | Simple_repe | Simple_repeat  | . |
| chr2 | 132512408 | 132512809 | .    | .         | .         | .           | .           | .              | . |
| chr2 | 132697270 | 132697671 | chr2 | 132697302 | 132697429 | MIR         | SINE        | MIR            | . |
| chr2 | 132697270 | 132697671 | chr2 | 132697442 | 132697617 | MLT1J1      | LTR         | MaLR           | . |
| chr2 | 136746968 | 136747369 | .    | .         | .         | .           | .           | .              | . |
| chr2 | 137860593 | 137860994 | chr2 | 137860821 | 137861191 | IAPLTR1_Mnr | LTR         | ERVK           | . |
| chr2 | 137865880 | 137866281 | chr2 | 137865654 | 137866024 | IAPLTR1_Mnr | LTR         | ERVK           | . |
| chr2 | 137865880 | 137866281 | chr2 | 137866024 | 137866149 | LTR16A1     | LTR         | ERVL           | . |
| chr2 | 139925784 | 139926185 | .    | .         | .         | .           | .           | .              | . |
| chr2 | 143729503 | 143729904 | chr2 | 143729778 | 143729960 | ID_B1       | SINE        | B4             | . |
| chr2 | 143735008 | 143735409 | chr2 | 143734834 | 143735262 | RLTR23      | LTR         | ERV1           | . |
| chr2 | 143735008 | 143735409 | chr2 | 143735262 | 143735308 | ID          | SINE        | ID             | . |
| chr2 | 143998169 | 143998570 | chr2 | 143998009 | 143998410 | LTR33A      | LTR         | ERVL           | . |
| chr2 | 145669050 | 145669451 | chr2 | 145668934 | 145669063 | B1_Mur1     | SINE        | Alu            | . |
| chr2 | 145669050 | 145669451 | chr2 | 145669306 | 145669568 | L1MB8       | LINE        | L1             | . |
| chr2 | 145691981 | 145692382 | chr2 | 145691994 | 145692056 | ID4_        | SINE        | ID             | . |
| chr2 | 145691981 | 145692382 | chr2 | 145692067 | 145692207 | B1F1        | SINE        | Alu            | . |
| chr2 | 145691981 | 145692382 | chr2 | 145692071 | 145692250 | B4          | SINE        | B4             | . |
| chr2 | 147940313 | 147940714 | chr2 | 147940340 | 147940371 | (TTTC)n     | Simple_repe | Simple_repeat  | . |
| chr2 | 147940313 | 147940714 | chr2 | 147940490 | 147940872 | LTR33A_     | LTR         | ERVL           | . |
| chr2 | 148347791 | 148348192 | .    | .         | .         | .           | .           | .              | . |
| chr2 | 151460630 | 151461031 | .    | .         | .         | .           | .           | .              | . |
| chr2 | 151518351 | 151518752 | chr2 | 151517916 | 151518445 | Lx8         | LINE        | L1             | . |
| chr2 | 151518351 | 151518752 | chr2 | 151518474 | 151518717 | MLT1J       | LTR         | MaLR           | . |
| chr2 | 151739822 | 151740223 | .    | .         | .         | .           | .           | .              | . |
| chr2 | 152152405 | 152152806 | chr2 | 152152354 | 152152486 | MT2B        | LTR         | ERVL           | . |
| chr2 | 152152405 | 152152806 | chr2 | 152152395 | 152152523 | B1_Mur1     | SINE        | Alu            | . |
| chr2 | 152152405 | 152152806 | chr2 | 152152536 | 152152711 | B3          | SINE        | B2             | . |
| chr2 | 152152405 | 152152806 | chr2 | 152152769 | 152152911 | ORR1E       | LTR         | MaLR           | . |
| chr2 | 152618143 | 152618544 | .    | .         | .         | .           | .           | .              | . |
| chr2 | 152631717 | 152632118 | chr2 | 152631556 | 152631864 | L2b         | LINE        | L2             | . |
| chr2 | 152752600 | 152753001 | .    | .         | .         | .           | .           | .              | . |
| chr2 | 153657580 | 153657981 | .    | .         | .         | .           | .           | .              | . |
| chr2 | 154210070 | 154210471 | chr2 | 154210292 | 154210470 | MLT1J       | LTR         | MaLR           | . |
| chr2 | 154546680 | 154547081 | chr2 | 154546997 | 154547095 | B1_Mm       | SINE        | Alu            | . |
| chr2 | 154561749 | 154562150 | chr2 | 154561896 | 154562158 | LTR16C      | LTR         | ERVL           | . |
| chr2 | 154568720 | 154569121 | chr2 | 154568496 | 154568937 | RLTR28      | LTR         | ERVL           | . |
| chr2 | 155529278 | 155529679 | chr2 | 155529649 | 155529725 | ID4         | SINE        | ID             | . |
| chr2 | 155851225 | 155851626 | chr2 | 155851417 | 155851557 | L1MC4a      | LINE        | L1             | . |
| chr2 | 156104404 | 156104805 | chr2 | 156104715 | 156104841 | RSINE1      | SINE        | B4             | . |
| chr2 | 156279414 | 156279815 | .    | .         | .         | .           | .           | .              | . |
| chr2 | 156635291 | 156635692 | chr2 | 156635283 | 156635387 | PB1D10      | SINE        | Alu            | . |
| chr2 | 157071363 | 157071764 | chr2 | 157071308 | 157071496 | B2_Mm2      | SINE        | B2             | . |
| chr2 | 157378185 | 157378586 | .    | .         | .         | .           | .           | .              | . |
| chr2 | 158150521 | 158150922 | chr2 | 158150667 | 158150783 | LTR33A_     | LTR         | ERVL           | . |
| chr2 | 158150521 | 158150922 | chr2 | 158150860 | 158150965 | LTR33A_     | LTR         | ERVL           | . |
| chr2 | 160393554 | 160393955 | chr2 | 160393273 | 160393598 | L1ME3       | LINE        | L1             | . |
| chr2 | 160393554 | 160393955 | chr2 | 160393604 | 160393852 | MLT1J2      | LTR         | MaLR           | . |
| chr2 | 160393554 | 160393955 | chr2 | 160393867 | 160393912 | (ATG)n      | Simple_repe | Simple_repeat  | . |
| chr2 | 161003206 | 161003607 | .    | .         | .         | .           | .           | .              | . |
| chr2 | 163562157 | 163562558 | chr2 | 163562178 | 163562230 | ID4         | SINE        | ID             | . |
| chr2 | 164280361 | 164280762 | chr2 | 164280704 | 164280849 | B1F1        | SINE        | Alu            | . |
| chr2 | 165089419 | 165089820 | chr2 | 165089506 | 165089765 | MLT1J       | LTR         | MaLR           | . |
| chr2 | 165245987 | 165246388 | .    | .         | .         | .           | .           | .              | . |
| chr2 | 165681177 | 165681578 | .    | .         | .         | .           | .           | .              | . |
| chr2 | 166000566 | 166000967 | .    | .         | .         | .           | .           | .              | . |
| chr2 | 166553667 | 166554068 | chr2 | 166553794 | 166554080 | MLT1J1      | LTR         | MaLR           | . |
| chr2 | 166612096 | 166612497 | .    | .         | .         | .           | .           | .              | . |
| chr2 | 167368575 | 167368976 | .    | .         | .         | .           | .           | .              | . |
| chr2 | 167395804 | 167396205 | chr2 | 167396139 | 167396178 | B4A         | SINE        | B4             | . |
| chr2 | 167395804 | 167396205 | chr2 | 167396178 | 167396291 | PB1D7       | SINE        | Alu            | . |
| chr2 | 167459838 | 167460239 | .    | .         | .         | .           | .           | .              | . |
| chr2 | 167533861 | 167534262 | chr2 | 167533775 | 167533960 | ID_B1       | SINE        | B4             | . |
| chr2 | 167564588 | 167564989 | .    | .         | .         | .           | .           | .              | . |
| chr2 | 167590671 | 167591072 | .    | .         | .         | .           | .           | .              | . |
| chr2 | 167602812 | 167603213 | .    | .         | .         | .           | .           | .              | . |
| chr2 | 167625562 | 167625963 | chr2 | 167625586 | 167625785 | MLT1J1      | LTR         | MaLR           | . |
| chr2 | 167625562 | 167625963 | chr2 | 167625832 | 167625987 | CT-rich     | Low_comple  | Low_complexity | . |
| chr2 | 167776777 | 167777178 | .    | .         | .         | .           | .           | .              | . |
| chr2 | 168277269 | 168277670 | .    | .         | .         | .           | .           | .              | . |

|      |           |           |      |           |           |             |             |                |   |
|------|-----------|-----------|------|-----------|-----------|-------------|-------------|----------------|---|
| chr2 | 168284097 | 168284498 | .    | .         | .         | .           | .           | .              | . |
| chr2 | 168343063 | 168343464 | chr2 | 168342876 | 168343102 | ID_B1       | SINE        | B4             | . |
| chr2 | 169983253 | 169983654 | chr2 | 169983320 | 169983406 | (TC)n       | Simple_repe | Simple_repeat  | . |
| chr2 | 173107142 | 173107543 | chr2 | 173107489 | 173107551 | MIR         | SINE        | MIR            | . |
| chr2 | 174168122 | 174168523 | chr2 | 174168187 | 174168223 | (CAA)n      | Simple_repe | Simple_repeat  | . |
| chr2 | 179458134 | 179458535 | .    | .         | .         | .           | .           | .              | . |
| chr2 | 180345627 | 180346028 | .    | .         | .         | .           | .           | .              | . |
| chr2 | 181652225 | 181652626 | chr2 | 181652116 | 181652258 | B1_Mus1     | SINE        | Alu            | . |
| chr2 | 181652225 | 181652626 | chr2 | 181652260 | 181652322 | (TTA)n      | Simple_repe | Simple_repeat  | . |
| chr2 | 181653277 | 181653678 | chr2 | 181653643 | 181653796 | B1_Mus1     | SINE        | Alu            | . |
| chr2 | 181665258 | 181665659 | chr2 | 181665064 | 181665654 | RLTR33      | LTR         | ERVK           | . |
| chr3 | 5860461   | 5860862   | chr3 | 5860318   | 5860822   | LSU-rRNA_Hr | rRNA        | rRNA           | . |
| chr3 | 5860461   | 5860862   | chr3 | 5860823   | 5862537   | L1Md_A      | LINE        | L1             | . |
| chr3 | 8246332   | 8246733   | .    | .         | .         | .           | .           | .              | . |
| chr3 | 8270048   | 8270449   | .    | .         | .         | .           | .           | .              | . |
| chr3 | 8971646   | 8972047   | chr3 | 8971690   | 8971774   | MLT1J1      | LTR         | MaLR           | . |
| chr3 | 8971646   | 8972047   | chr3 | 8971813   | 8971880   | MLT1J1      | LTR         | MaLR           | . |
| chr3 | 8971646   | 8972047   | chr3 | 8971866   | 8971996   | MLT1J1      | LTR         | MaLR           | . |
| chr3 | 14902408  | 14902809  | chr3 | 14902788  | 14902904  | Lx9         | LINE        | L1             | . |
| chr3 | 19329714  | 19330115  | .    | .         | .         | .           | .           | .              | . |
| chr3 | 19528796  | 19529197  | chr3 | 19528781  | 19528870  | tRNA-Tyr-TA | tRNA        | tRNA           | . |
| chr3 | 19528796  | 19529197  | chr3 | 19528994  | 19529067  | tRNA-Ala-GC | tRNA        | tRNA           | . |
| chr3 | 21721601  | 21722002  | chr3 | 21721788  | 21721874  | ID4         | SINE        | ID             | . |
| chr3 | 21834818  | 21835219  | .    | .         | .         | .           | .           | .              | . |
| chr3 | 21851894  | 21852295  | .    | .         | .         | .           | .           | .              | . |
| chr3 | 28242647  | 28243048  | .    | .         | .         | .           | .           | .              | . |
| chr3 | 28422046  | 28422447  | chr3 | 28421873  | 28422124  | B4          | SINE        | B4             | . |
| chr3 | 34178980  | 34179381  | chr3 | 34178971  | 34178998  | AT_rich     | Low_comple  | Low_complexity | . |
| chr3 | 34178980  | 34179381  | chr3 | 34179118  | 34179216  | RLTR15      | LTR         | ERVK           | . |
| chr3 | 34431393  | 34431794  | .    | .         | .         | .           | .           | .              | . |
| chr3 | 35570734  | 35571135  | chr3 | 35570708  | 35571018  | RLTR15      | LTR         | ERVK           | . |
| chr3 | 35570734  | 35571135  | chr3 | 35571031  | 35572064  | Lx9         | LINE        | L1             | . |
| chr3 | 35579276  | 35579677  | chr3 | 35579389  | 35579702  | (TG)n       | Simple_repe | Simple_repeat  | . |
| chr3 | 36348271  | 36348672  | .    | .         | .         | .           | .           | .              | . |
| chr3 | 36439657  | 36440058  | .    | .         | .         | .           | .           | .              | . |
| chr3 | 37027169  | 37027570  | .    | .         | .         | .           | .           | .              | . |
| chr3 | 37259774  | 37260175  | .    | .         | .         | .           | .           | .              | . |
| chr3 | 37773800  | 37774201  | chr3 | 37774104  | 37774155  | (CA)n       | Simple_repe | Simple_repeat  | . |
| chr3 | 37773800  | 37774201  | chr3 | 37774168  | 37774276  | (GA)n       | Simple_repe | Simple_repeat  | . |
| chr3 | 38154040  | 38154441  | chr3 | 38153951  | 38154249  | L1MB5       | LINE        | L1             | . |
| chr3 | 38154040  | 38154441  | chr3 | 38154394  | 38154452  | SYNREP_MM   | Satellite   | Satellite      | . |
| chr3 | 39901759  | 39902160  | chr3 | 39901928  | 39901986  | PB1         | SINE        | Alu            | . |
| chr3 | 39901759  | 39902160  | chr3 | 39901986  | 39902037  | ID_B1       | SINE        | B4             | . |
| chr3 | 39901759  | 39902160  | chr3 | 39902048  | 39902138  | B1F         | SINE        | Alu            | . |
| chr3 | 39901759  | 39902160  | chr3 | 39902156  | 39902491  | ORR1B1      | LTR         | MaLR           | . |
| chr3 | 40397847  | 40398248  | chr3 | 40397471  | 40397920  | L1M3        | LINE        | L1             | . |
| chr3 | 40397847  | 40398248  | chr3 | 40398110  | 40398131  | (TTTG)n     | Simple_repe | Simple_repeat  | . |
| chr3 | 40397847  | 40398248  | chr3 | 40398137  | 40398207  | ID4         | SINE        | ID             | . |
| chr3 | 40397847  | 40398248  | chr3 | 40398217  | 40398948  | RMERIC      | Other       | Other          | . |
| chr3 | 41088784  | 41089185  | .    | .         | .         | .           | .           | .              | . |
| chr3 | 48898308  | 48898709  | .    | .         | .         | .           | .           | .              | . |
| chr3 | 49837172  | 49837573  | .    | .         | .         | .           | .           | .              | . |
| chr3 | 50895409  | 50895810  | chr3 | 50895648  | 50896020  | L3          | LINE        | CR1            | . |
| chr3 | 51856237  | 51856638  | .    | .         | .         | .           | .           | .              | . |
| chr3 | 51984368  | 51984769  | chr3 | 51984144  | 51984409  | B4A         | SINE        | B4             | . |
| chr3 | 52314299  | 52314700  | .    | .         | .         | .           | .           | .              | . |
| chr3 | 52800610  | 52801011  | .    | .         | .         | .           | .           | .              | . |
| chr3 | 52912493  | 52912894  | .    | .         | .         | .           | .           | .              | . |
| chr3 | 52954907  | 52955308  | .    | .         | .         | .           | .           | .              | . |
| chr3 | 54284171  | 54284572  | .    | .         | .         | .           | .           | .              | . |
| chr3 | 54899764  | 54900165  | chr3 | 54899492  | 54899791  | RLTR42-int  | LTR         | ERVK           | . |
| chr3 | 54899764  | 54900165  | chr3 | 54899920  | 54899994  | RLTR42      | LTR         | ERVK           | . |
| chr3 | 54899764  | 54900165  | chr3 | 54900143  | 54900227  | MER2B       | DNA         | MER2_type      | . |
| chr3 | 55375675  | 55376076  | .    | .         | .         | .           | .           | .              | . |
| chr3 | 56379277  | 56379678  | chr3 | 56379320  | 56379354  | (TC)n       | Simple_repe | Simple_repeat  | . |
| chr3 | 56379277  | 56379678  | chr3 | 56379356  | 56379673  | GSAT_MM     | Satellite   | Satellite      | . |
| chr3 | 56379277  | 56379678  | chr3 | 56379673  | 56379735  | (TC)n       | Simple_repe | Simple_repeat  | . |
| chr3 | 57098975  | 57099376  | .    | .         | .         | .           | .           | .              | . |
| chr3 | 57308040  | 57308441  | .    | .         | .         | .           | .           | .              | . |
| chr3 | 58883282  | 58883683  | chr3 | 58882927  | 58883287  | ORR1E       | LTR         | MaLR           | . |
| chr3 | 59214618  | 59215019  | chr3 | 59213766  | 59216252  | L1Md_F2     | LINE        | L1             | . |
| chr3 | 60331945  | 60332346  | .    | .         | .         | .           | .           | .              | . |
| chr3 | 60393410  | 60393811  | .    | .         | .         | .           | .           | .              | . |
| chr3 | 63243679  | 63244080  | chr3 | 63244011  | 63244134  | ID_B1       | SINE        | B4             | . |
| chr3 | 64768955  | 64769356  | chr3 | 64769038  | 64769236  | MLT1J1      | LTR         | MaLR           | . |
| chr3 | 65100936  | 65101337  | .    | .         | .         | .           | .           | .              | . |
| chr3 | 65726439  | 65726840  | .    | .         | .         | .           | .           | .              | . |
| chr3 | 65883789  | 65884190  | chr3 | 65883800  | 65883887  | PB1D10      | SINE        | Alu            | . |
| chr3 | 65883789  | 65884190  | chr3 | 65884156  | 65884335  | (TG)n       | Simple_repe | Simple_repeat  | . |
| chr3 | 65885424  | 65885825  | .    | .         | .         | .           | .           | .              | . |
| chr3 | 66012829  | 66013230  | .    | .         | .         | .           | .           | .              | . |
| chr3 | 66113235  | 66113636  | chr3 | 66113132  | 66113274  | L1MD        | LINE        | L1             | . |
| chr3 | 66113235  | 66113636  | chr3 | 66113354  | 66113464  | L1M4        | LINE        | L1             | . |
| chr3 | 66113235  | 66113636  | chr3 | 66113600  | 66113710  | L1M4        | LINE        | L1             | . |
| chr3 | 67294072  | 67294473  | .    | .         | .         | .           | .           | .              | . |
| chr3 | 67357215  | 67357616  | chr3 | 67357403  | 67357446  | RLTR42      | LTR         | ERVK           | . |
| chr3 | 68312488  | 68312889  | .    | .         | .         | .           | .           | .              | . |
| chr3 | 69009536  | 69009937  | .    | .         | .         | .           | .           | .              | . |
| chr3 | 69057023  | 69057424  | .    | .         | .         | .           | .           | .              | . |
| chr3 | 69244696  | 69245097  | .    | .         | .         | .           | .           | .              | . |
| chr3 | 69908682  | 69909083  | .    | .         | .         | .           | .           | .              | . |
| chr3 | 70300833  | 70301234  | .    | .         | .         | .           | .           | .              | . |
| chr3 | 79346496  | 79346897  | .    | .         | .         | .           | .           | .              | . |
| chr3 | 79654551  | 79654952  | .    | .         | .         | .           | .           | .              | . |
| chr3 | 80862141  | 80862542  | .    | .         | .         | .           | .           | .              | . |

|      |           |           |      |           |           |            |                           |                |   |
|------|-----------|-----------|------|-----------|-----------|------------|---------------------------|----------------|---|
| chr3 | 80967966  | 80968367  | .    | .         | .         | .          | .                         | .              | . |
| chr3 | 82079377  | 82079778  | .    | .         | .         | .          | .                         | .              | . |
| chr3 | 82940316  | 82940717  | .    | .         | .         | .          | .                         | .              | . |
| chr3 | 84066847  | 84067248  | chr3 | 84067056  | 84067234  | (TATG)n    | Simple_repe:Simple_repeat | .              | . |
| chr3 | 84097492  | 84097893  | chr3 | 84097441  | 84097575  | B1_Mus2    | SINE                      | Alu            | . |
| chr3 | 84097492  | 84097893  | chr3 | 84097651  | 84097714  | ID4        | SINE                      | ID             | . |
| chr3 | 84097492  | 84097893  | chr3 | 84097719  | 84097855  | ZP3AR      | Satellite                 | Satellite      | . |
| chr3 | 84122646  | 84123047  | chr3 | 84122538  | 84122797  | MLT2C2     | LTR                       | ERVL           | . |
| chr3 | 84122646  | 84123047  | chr3 | 84122797  | 84122880  | ID4        | SINE                      | ID             | . |
| chr3 | 84122646  | 84123047  | chr3 | 84122880  | 84123011  | MLT2C2     | LTR                       | ERVL           | . |
| chr3 | 84128809  | 84129210  | chr3 | 84128967  | 84129225  | ORR1E      | LTR                       | MaLR           | . |
| chr3 | 84233195  | 84233596  | .    | .         | .         | .          | .                         | .              | . |
| chr3 | 84451598  | 84451999  | chr3 | 84451455  | 84451651  | L3b        | LINE                      | CR1            | . |
| chr3 | 84451598  | 84451999  | chr3 | 84451859  | 84451897  | MER5B      | DNA                       | MER1_type      | . |
| chr3 | 84451598  | 84451999  | chr3 | 84451987  | 84452133  | B1_Mus2    | SINE                      | Alu            | . |
| chr3 | 85728311  | 85728712  | .    | .         | .         | .          | .                         | .              | . |
| chr3 | 85860580  | 85860981  | chr3 | 85860483  | 85860671  | B3A        | SINE                      | B2             | . |
| chr3 | 85860580  | 85860981  | chr3 | 85860936  | 85861034  | MLT2C1     | LTR                       | ERVL           | . |
| chr3 | 87714811  | 87715212  | chr3 | 87715167  | 87715362  | B3         | SINE                      | B2             | . |
| chr3 | 87937265  | 87937666  | .    | .         | .         | .          | .                         | .              | . |
| chr3 | 87981512  | 87981913  | .    | .         | .         | .          | .                         | .              | . |
| chr3 | 88014047  | 88014448  | .    | .         | .         | .          | .                         | .              | . |
| chr3 | 88024771  | 88025172  | .    | .         | .         | .          | .                         | .              | . |
| chr3 | 88268345  | 88268746  | chr3 | 88268495  | 88268687  | L2         | LINE                      | L2             | . |
| chr3 | 88292301  | 88292702  | .    | .         | .         | .          | .                         | .              | . |
| chr3 | 88428947  | 88429348  | .    | .         | .         | .          | .                         | .              | . |
| chr3 | 89003768  | 89004169  | chr3 | 89003714  | 89003791  | (GGAA)n    | Simple_repe:Simple_repeat | .              | . |
| chr3 | 89003768  | 89004169  | chr3 | 89003801  | 89003857  | GA-rich    | Low_comple                | Low_complexity | . |
| chr3 | 89120981  | 89121382  | chr3 | 89121167  | 89121245  | (TC)n      | Simple_repe:Simple_repeat | .              | . |
| chr3 | 89192714  | 89193115  | .    | .         | .         | .          | .                         | .              | . |
| chr3 | 89253496  | 89253897  | chr3 | 89253878  | 89254019  | B1_Mus1    | SINE                      | Alu            | . |
| chr3 | 89991754  | 89992155  | chr3 | 89991751  | 89991843  | L1M3       | LINE                      | L1             | . |
| chr3 | 89991754  | 89992155  | chr3 | 89991892  | 89991952  | ID_B1      | SINE                      | B4             | . |
| chr3 | 89991754  | 89992155  | chr3 | 89991952  | 89992354  | MTC        | LTR                       | MaLR           | . |
| chr3 | 90353640  | 90354041  | chr3 | 90353637  | 90353729  | PB1D7      | SINE                      | Alu            | . |
| chr3 | 90353640  | 90354041  | chr3 | 90353961  | 90354009  | B3         | SINE                      | B2             | . |
| chr3 | 90353640  | 90354041  | chr3 | 90354010  | 90354101  | L2         | LINE                      | L2             | . |
| chr3 | 90391566  | 90391967  | chr3 | 90391652  | 90391676  | (CG)n      | Simple_repe:Simple_repeat | .              | . |
| chr3 | 90391566  | 90391967  | chr3 | 90391676  | 90391720  | (CA)n      | Simple_repe:Simple_repeat | .              | . |
| chr3 | 90391566  | 90391967  | chr3 | 90391881  | 90392217  | MTB_Mm     | LTR                       | MaLR           | . |
| chr3 | 93341192  | 93341593  | chr3 | 93341502  | 93341524  | (TG)n      | Simple_repe:Simple_repeat | .              | . |
| chr3 | 93341192  | 93341593  | chr3 | 93341577  | 93341816  | RMER6B     | LTR                       | ERVK           | . |
| chr3 | 93372582  | 93372983  | .    | .         | .         | .          | .                         | .              | . |
| chr3 | 94452996  | 94453397  | .    | .         | .         | .          | .                         | .              | . |
| chr3 | 95050564  | 95050965  | chr3 | 95050556  | 95050624  | RSINE1     | SINE                      | B4             | . |
| chr3 | 95050564  | 95050965  | chr3 | 95050907  | 95051038  | B1F        | SINE                      | Alu            | . |
| chr3 | 95097587  | 95097988  | chr3 | 95097757  | 95097924  | MLT1I      | LTR                       | MaLR           | . |
| chr3 | 95211697  | 95212098  | chr3 | 95211745  | 95211964  | Charlie25  | DNA                       | MER1_type      | . |
| chr3 | 95211697  | 95212098  | chr3 | 95211984  | 95212089  | B3         | SINE                      | B2             | . |
| chr3 | 95478775  | 95479176  | chr3 | 95478685  | 95479062  | RMER10A    | LTR                       | ERVL           | . |
| chr3 | 96380148  | 96380549  | .    | .         | .         | .          | .                         | .              | . |
| chr3 | 97438335  | 97438736  | chr3 | 97438234  | 97438444  | B4         | SINE                      | B4             | . |
| chr3 | 97438335  | 97438736  | chr3 | 97438444  | 97438621  | B2_Mm2     | SINE                      | B2             | . |
| chr3 | 97438335  | 97438736  | chr3 | 97438621  | 97438679  | B4         | SINE                      | B4             | . |
| chr3 | 97438335  | 97438736  | chr3 | 97438718  | 97439028  | L1MC       | LINE                      | L1             | . |
| chr3 | 97702254  | 97702655  | chr3 | 97702303  | 97702343  | (TC)n      | Simple_repe:Simple_repeat | .              | . |
| chr3 | 98031091  | 98031492  | chr3 | 98031089  | 98031298  | MIR        | SINE                      | MIR            | . |
| chr3 | 98120929  | 98121330  | chr3 | 98120859  | 98120955  | PB1D7      | SINE                      | Alu            | . |
| chr3 | 98193248  | 98193649  | chr3 | 98193315  | 98193380  | L1MC1      | LINE                      | L1             | . |
| chr3 | 98193248  | 98193649  | chr3 | 98193384  | 98193497  | MLT1J      | LTR                       | MaLR           | . |
| chr3 | 98193248  | 98193649  | chr3 | 98193522  | 98195764  | RLTR42-int | LTR                       | ERVK           | . |
| chr3 | 99784917  | 99785318  | chr3 | 99785017  | 99785317  | GSAT_MM    | Satellite                 | Satellite      | . |
| chr3 | 101010084 | 101010485 | chr3 | 101009857 | 101010206 | RLTR13D5   | LTR                       | ERVK           | . |
| chr3 | 101010084 | 101010485 | chr3 | 101010271 | 101010343 | LTR33A     | LTR                       | ERVL           | . |
| chr3 | 101010084 | 101010485 | chr3 | 101010280 | 101010356 | MLT1J      | LTR                       | MaLR           | . |
| chr3 | 102505773 | 102506174 | .    | .         | .         | .          | .                         | .              | . |
| chr3 | 103177901 | 103178302 | chr3 | 103178069 | 103178263 | B3         | SINE                      | B2             | . |
| chr3 | 103486400 | 103486801 | .    | .         | .         | .          | .                         | .              | . |
| chr3 | 103487548 | 103487949 | .    | .         | .         | .          | .                         | .              | . |
| chr3 | 103520954 | 103521355 | chr3 | 103520996 | 103521040 | (CA)n      | Simple_repe:Simple_repeat | .              | . |
| chr3 | 103563518 | 103563919 | .    | .         | .         | .          | .                         | .              | . |
| chr3 | 104156766 | 104157167 | .    | .         | .         | .          | .                         | .              | . |
| chr3 | 104164297 | 104164698 | chr3 | 104164390 | 104164438 | L2a        | LINE                      | L2             | . |
| chr3 | 104231289 | 104231690 | chr3 | 104231294 | 104231464 | RMER10A    | LTR                       | ERVL           | . |
| chr3 | 104231289 | 104231690 | chr3 | 104231464 | 104231553 | PB1        | SINE                      | Alu            | . |
| chr3 | 104231289 | 104231690 | chr3 | 104231553 | 104231703 | GA-rich    | Low_comple                | Low_complexity | . |
| chr3 | 104345027 | 104345428 | chr3 | 104345004 | 104345029 | (A)n       | Simple_repe:Simple_repeat | .              | . |
| chr3 | 107579225 | 107579626 | .    | .         | .         | .          | .                         | .              | . |
| chr3 | 107632949 | 107633350 | chr3 | 107632931 | 107632998 | PB1D7      | SINE                      | Alu            | . |
| chr3 | 107742399 | 107742800 | chr3 | 107742751 | 107742842 | L3         | LINE                      | CR1            | . |
| chr3 | 108573674 | 108574075 | .    | .         | .         | .          | .                         | .              | . |
| chr3 | 108813973 | 108814374 | .    | .         | .         | .          | .                         | .              | . |
| chr3 | 109851060 | 109851461 | .    | .         | .         | .          | .                         | .              | . |
| chr3 | 115815987 | 115816388 | .    | .         | .         | .          | .                         | .              | . |
| chr3 | 116139674 | 116140075 | chr3 | 116139868 | 116140068 | MER72      | LTR                       | ERV1           | . |
| chr3 | 116469825 | 116470226 | chr3 | 116469840 | 116469978 | B1_Mus2    | SINE                      | Alu            | . |
| chr3 | 116469825 | 116470226 | chr3 | 116469978 | 116470021 | (CAAAA)n   | Simple_repe:Simple_repeat | .              | . |
| chr3 | 116469825 | 116470226 | chr3 | 116470139 | 116470257 | B1_Mus1    | SINE                      | Alu            | . |
| chr3 | 116551057 | 116551458 | chr3 | 116551433 | 116551494 | (TCTG)n    | Simple_repe:Simple_repeat | .              | . |
| chr3 | 116741434 | 116741835 | .    | .         | .         | .          | .                         | .              | . |
| chr3 | 116790581 | 116790982 | chr3 | 116790546 | 116790694 | ORR1B2     | LTR                       | MaLR           | . |
| chr3 | 119619141 | 119619542 | chr3 | 119619061 | 119619249 | RMER30     | DNA                       | MER1_type      | . |
| chr3 | 119619141 | 119619542 | chr3 | 119619293 | 119619469 | B3         | SINE                      | B2             | . |
| chr3 | 119619141 | 119619542 | chr3 | 119619499 | 119619624 | MIR        | SINE                      | MIR            | . |
| chr3 | 120119502 | 120119903 | .    | .         | .         | .          | .                         | .              | . |

|      |           |           |      |           |           |           |             |               |
|------|-----------|-----------|------|-----------|-----------|-----------|-------------|---------------|
| chr3 | 121279221 | 121279622 | chr3 | 121279231 | 121279389 | ID_B1     | SINE        | B4            |
| chr3 | 121352938 | 121353339 | chr3 | 121352957 | 121353053 | MIR       | SINE        | MIR           |
| chr3 | 121399558 | 121400359 | chr3 | 121400251 | 121400421 | LTR78     | LTR         | ERV1          |
| chr3 | 121471825 | 121472226 | .    | .         | .         | .         | .           | .             |
| chr3 | 121791185 | 121791586 | .    | .         | .         | .         | .           | .             |
| chr3 | 121824996 | 121825397 | .    | .         | .         | .         | .           | .             |
| chr3 | 122051621 | 122052022 | .    | .         | .         | .         | .           | .             |
| chr3 | 122212450 | 122212851 | chr3 | 122212644 | 122212745 | MIRb      | SINE        | MIR           |
| chr3 | 122825591 | 122825992 | .    | .         | .         | .         | .           | .             |
| chr3 | 123355860 | 123356261 | .    | .         | .         | .         | .           | .             |
| chr3 | 126273650 | 126274051 | .    | .         | .         | .         | .           | .             |
| chr3 | 126534366 | 126534767 | .    | .         | .         | .         | .           | .             |
| chr3 | 126671669 | 126672070 | .    | .         | .         | .         | .           | .             |
| chr3 | 126766537 | 126766938 | .    | .         | .         | .         | .           | .             |
| chr3 | 129001278 | 129001679 | .    | .         | .         | .         | .           | .             |
| chr3 | 129607558 | 129607959 | chr3 | 129607468 | 129607572 | PB1       | SINE        | Alu           |
| chr3 | 129607558 | 129607959 | chr3 | 129607585 | 129607715 | MER3      | DNA         | MER1_type     |
| chr3 | 129640816 | 129641217 | .    | .         | .         | .         | .           | .             |
| chr3 | 129652081 | 129652482 | chr3 | 129651973 | 129652084 | L1MA8     | LINE        | L1            |
| chr3 | 129652081 | 129652482 | chr3 | 129652363 | 129652688 | MLT1A     | LTR         | MaLR          |
| chr3 | 130288486 | 130288887 | .    | .         | .         | .         | .           | .             |
| chr3 | 130590412 | 130590813 | chr3 | 130590363 | 130590820 | L1MC3     | LINE        | L1            |
| chr3 | 131509777 | 131510178 | chr3 | 131509698 | 131509887 | L1MC1     | LINE        | L1            |
| chr3 | 131509777 | 131510178 | chr3 | 131510048 | 131510340 | L1MC1     | LINE        | L1            |
| chr3 | 131558027 | 131558428 | chr3 | 131557785 | 131558283 | MLT2F     | LTR         | ERV1          |
| chr3 | 132534423 | 132534824 | .    | .         | .         | .         | .           | .             |
| chr3 | 133263846 | 133264247 | .    | .         | .         | .         | .           | .             |
| chr3 | 133271973 | 133272374 | chr3 | 133272017 | 133272198 | MLT2E     | LTR         | ERV1          |
| chr3 | 133271973 | 133272374 | chr3 | 133272341 | 133272392 | (TC)n     | Simple_repe | Simple_repeat |
| chr3 | 135171207 | 135171608 | .    | .         | .         | .         | .           | .             |
| chr3 | 135185101 | 135185502 | chr3 | 135185398 | 135185444 | (GA)n     | Simple_repe | Simple_repeat |
| chr3 | 135291566 | 135291967 | .    | .         | .         | .         | .           | .             |
| chr3 | 135829653 | 135830054 | .    | .         | .         | .         | .           | .             |
| chr3 | 136114339 | 136114740 | .    | .         | .         | .         | .           | .             |
| chr3 | 136303780 | 136304181 | .    | .         | .         | .         | .           | .             |
| chr3 | 138179087 | 138179488 | chr3 | 138178870 | 138179158 | B4A       | SINE        | B4            |
| chr3 | 138423563 | 138423964 | .    | .         | .         | .         | .           | .             |
| chr3 | 144265822 | 144266223 | chr3 | 144266203 | 144266393 | B3A       | SINE        | B2            |
| chr3 | 144332394 | 144332795 | .    | .         | .         | .         | .           | .             |
| chr3 | 144931056 | 144931457 | chr3 | 144931029 | 144931203 | Lx9       | LINE        | L1            |
| chr3 | 144931056 | 144931457 | chr3 | 144931205 | 144931321 | LTR78     | LTR         | ERV1          |
| chr3 | 144931056 | 144931457 | chr3 | 144931376 | 144931497 | MIRb      | SINE        | MIR           |
| chr3 | 145348012 | 145348413 | .    | .         | .         | .         | .           | .             |
| chr3 | 145368420 | 145368821 | chr3 | 145368720 | 145368752 | (TG)n     | Simple_repe | Simple_repeat |
| chr3 | 145368420 | 145368821 | chr3 | 145368752 | 145368818 | (CA)n     | Simple_repe | Simple_repeat |
| chr3 | 146564238 | 146564639 | .    | .         | .         | .         | .           | .             |
| chr3 | 146776716 | 146777117 | .    | .         | .         | .         | .           | .             |
| chr3 | 147465552 | 147465953 | .    | .         | .         | .         | .           | .             |
| chr3 | 148715485 | 148715886 | chr3 | 148715436 | 148715898 | (TTAGGG)n | Simple_repe | Simple_repeat |
| chr3 | 151071079 | 151071480 | .    | .         | .         | .         | .           | .             |
| chr3 | 151168482 | 151168883 | .    | .         | .         | .         | .           | .             |
| chr3 | 151641143 | 151641544 | .    | .         | .         | .         | .           | .             |
| chr3 | 151703490 | 151703891 | .    | .         | .         | .         | .           | .             |
| chr3 | 151785637 | 151786038 | chr3 | 151785579 | 151785734 | ID_B1     | SINE        | B4            |
| chr3 | 151785637 | 151786038 | chr3 | 151785734 | 151785787 | ORR1C1    | LTR         | MaLR          |
| chr3 | 151785637 | 151786038 | chr3 | 151785787 | 151786134 | ORR1C1    | LTR         | MaLR          |
| chr3 | 151971615 | 151972016 | chr3 | 151971879 | 151971979 | RSINE1    | SINE        | B4            |
| chr3 | 151971615 | 151972016 | chr3 | 151972006 | 151972133 | B1_Mur2   | SINE        | Alu           |
| chr3 | 152231632 | 152232033 | .    | .         | .         | .         | .           | .             |
| chr3 | 152786582 | 152786983 | chr3 | 152786703 | 152786882 | (CATT)n   | Simple_repe | Simple_repeat |
| chr3 | 153647414 | 153647815 | chr3 | 153647525 | 153647801 | RMER20B   | LTR         | ERVK          |
| chr3 | 153953187 | 153953588 | chr3 | 153953212 | 153953276 | (GA)n     | Simple_repe | Simple_repeat |
| chr3 | 153953187 | 153953588 | chr3 | 153953551 | 153953678 | RSINE1    | SINE        | B4            |
| chr3 | 154741003 | 154741404 | chr3 | 154740938 | 154741339 | RMER6C    | LTR         | ERVK          |
| chr3 | 154741003 | 154741404 | chr3 | 154741385 | 154741496 | RLTR33    | LTR         | ERVK          |
| chr3 | 157725109 | 157725510 | .    | .         | .         | .         | .           | .             |
| chr4 | 3010773   | 3011174   | .    | .         | .         | .         | .           | .             |
| chr4 | 3017259   | 3017660   | chr4 | 3016701   | 3018331   | GSAT_MM   | Satellite   | Satellite     |
| chr4 | 8426084   | 8426485   | chr4 | 8425968   | 8426087   | B1F       | SINE        | Alu           |
| chr4 | 10284788  | 10285189  | chr4 | 10284824  | 10285070  | L2c       | LINE        | L2            |
| chr4 | 14598595  | 14598996  | chr4 | 14598692  | 14599033  | RLTR15    | LTR         | ERVK          |
| chr4 | 28103922  | 28104323  | chr4 | 28103933  | 28103988  | CENSAT_MC | Satellite   | centr         |
| chr4 | 28103922  | 28104323  | chr4 | 28103949  | 28104365  | SYNREP_MM | Satellite   | Satellite     |
| chr4 | 32028460  | 32028861  | chr4 | 32028630  | 32028828  | LTR88c    | LTR         | Genie?        |
| chr4 | 32028460  | 32028861  | chr4 | 32028856  | 32029132  | Lx7       | LINE        | L1            |
| chr4 | 41300362  | 41300763  | chr4 | 41300402  | 41300491  | B1F2      | SINE        | Alu           |
| chr4 | 41300362  | 41300763  | chr4 | 41300624  | 41300746  | L1M5      | LINE        | L1            |
| chr4 | 43052098  | 43052499  | .    | .         | .         | .         | .           | .             |
| chr4 | 43490972  | 43491373  | chr4 | 43491055  | 43491090  | (CCAA)n   | Simple_repe | Simple_repeat |
| chr4 | 46214365  | 46214766  | chr4 | 46214481  | 46214597  | PB1D10    | SINE        | Alu           |
| chr4 | 53208859  | 53209260  | .    | .         | .         | .         | .           | .             |
| chr4 | 54942521  | 54942922  | chr4 | 54942624  | 54942752  | PB1D9     | SINE        | Alu           |
| chr4 | 54942521  | 54942922  | chr4 | 54942771  | 54942880  | PB1D7     | SINE        | Alu           |
| chr4 | 54942521  | 54942922  | chr4 | 54942880  | 54942988  | (GGAA)n   | Simple_repe | Simple_repeat |
| chr4 | 55115450  | 55115851  | chr4 | 55115732  | 55116156  | MTE2a     | LTR         | MaLR          |
| chr4 | 55266634  | 55267035  | .    | .         | .         | .         | .           | .             |
| chr4 | 55338773  | 55339174  | chr4 | 55338856  | 55339031  | B2_Mm2    | SINE        | B2            |
| chr4 | 55338773  | 55339174  | chr4 | 55339078  | 55339116  | B2_Mm2    | SINE        | B2            |
| chr4 | 55338773  | 55339174  | chr4 | 55339168  | 55339309  | RSINE1    | SINE        | B4            |
| chr4 | 55720718  | 55721119  | .    | .         | .         | .         | .           | .             |
| chr4 | 55734598  | 55734999  | .    | .         | .         | .         | .           | .             |
| chr4 | 56117426  | 56117827  | chr4 | 56117465  | 56117696  | MLT1J2    | LTR         | MaLR          |
| chr4 | 56117426  | 56117827  | chr4 | 56117740  | 56117879  | L2c       | LINE        | L2            |
| chr4 | 56173347  | 56173748  | .    | .         | .         | .         | .           | .             |
| chr4 | 56336208  | 56336609  | chr4 | 56336100  | 56336303  | Tigger6b  | DNA         | MER2_type     |

|      |           |           |      |          |          |           |             |                |   |
|------|-----------|-----------|------|----------|----------|-----------|-------------|----------------|---|
| chr4 | 56386638  | 56387039  | .    | .        | .        | .         | .           | .              | . |
| chr4 | 56406793  | 56407194  | .    | .        | .        | .         | .           | .              | . |
| chr4 | 56432422  | 56432823  | chr4 | 56431997 | 56432674 | MamRep605 | Unknown     | Unknown        |   |
| chr4 | 56546160  | 56546561  | .    | .        | .        | .         | .           | .              | . |
| chr4 | 56698093  | 56698494  | chr4 | 56698072 | 56698095 | (A)n      | Simple_repe | Simple_repeat  |   |
| chr4 | 56698093  | 56698494  | chr4 | 56698098 | 56698133 | (CAGGG)n  | Simple_repe | Simple_repeat  |   |
| chr4 | 56698093  | 56698494  | chr4 | 56698341 | 56698549 | MIRb      | SINE        | MIR            |   |
| chr4 | 56850521  | 56850922  | .    | .        | .        | .         | .           | .              | . |
| chr4 | 57166341  | 57166742  | chr4 | 57166341 | 57166473 | MIRb      | SINE        | MIR            |   |
| chr4 | 57166341  | 57166742  | chr4 | 57166695 | 57166719 | (CAGG)n   | Simple_repe | Simple_repeat  |   |
| chr4 | 57307928  | 57308329  | .    | .        | .        | .         | .           | .              | . |
| chr4 | 57556624  | 57557025  | .    | .        | .        | .         | .           | .              | . |
| chr4 | 57744065  | 57744466  | .    | .        | .        | .         | .           | .              | . |
| chr4 | 57811236  | 57811637  | chr4 | 57811402 | 57811415 | B4A       | SINE        | B4             |   |
| chr4 | 57811236  | 57811637  | chr4 | 57811415 | 57811513 | PB1D10    | SINE        | Alu            |   |
| chr4 | 57811236  | 57811637  | chr4 | 57811513 | 57812075 | RLTR28    | LTR         | ERV_L          |   |
| chr4 | 57852391  | 57852792  | chr4 | 57852538 | 57852658 | B4A       | SINE        | B4             |   |
| chr4 | 57878899  | 57879300  | .    | .        | .        | .         | .           | .              | . |
| chr4 | 57977046  | 57977447  | chr4 | 57976988 | 57977103 | PB1D10    | SINE        | Alu            |   |
| chr4 | 58045533  | 58045934  | .    | .        | .        | .         | .           | .              | . |
| chr4 | 58343731  | 58344132  | .    | .        | .        | .         | .           | .              | . |
| chr4 | 58371968  | 58372369  | chr4 | 58372358 | 58372437 | MIRb      | SINE        | MIR            |   |
| chr4 | 58414998  | 58415399  | .    | .        | .        | .         | .           | .              | . |
| chr4 | 59813021  | 59813422  | chr4 | 59813110 | 59813161 | (CA)n     | Simple_repe | Simple_repeat  |   |
| chr4 | 59813021  | 59813422  | chr4 | 59813402 | 59813456 | L4        | LINE        | RTE            |   |
| chr4 | 59820402  | 59820803  | chr4 | 59820474 | 59820663 | MLT1F     | LTR         | MaLR           |   |
| chr4 | 59820402  | 59820803  | chr4 | 59820663 | 59820850 | MLT1F     | LTR         | MaLR           |   |
| chr4 | 62059976  | 62060377  | chr4 | 62060007 | 62060123 | PB1D7     | SINE        | Alu            |   |
| chr4 | 62059976  | 62060377  | chr4 | 62060354 | 62060443 | PB1D7     | SINE        | Alu            |   |
| chr4 | 62393787  | 62394188  | .    | .        | .        | .         | .           | .              | . |
| chr4 | 62424994  | 62425395  | chr4 | 62424940 | 62425075 | B1_Mus2   | SINE        | Alu            |   |
| chr4 | 62729854  | 62730255  | .    | .        | .        | .         | .           | .              | . |
| chr4 | 62984419  | 62984820  | .    | .        | .        | .         | .           | .              | . |
| chr4 | 63070773  | 63071174  | .    | .        | .        | .         | .           | .              | . |
| chr4 | 63182829  | 63183230  | chr4 | 63182727 | 63182857 | L1M5      | LINE        | L1             |   |
| chr4 | 63191457  | 63191858  | .    | .        | .        | .         | .           | .              | . |
| chr4 | 63329352  | 63329753  | .    | .        | .        | .         | .           | .              | . |
| chr4 | 63335942  | 63336343  | .    | .        | .        | .         | .           | .              | . |
| chr4 | 63446510  | 63446911  | chr4 | 63446686 | 63446743 | MIRm      | SINE        | MIR            |   |
| chr4 | 63737498  | 63737899  | .    | .        | .        | .         | .           | .              | . |
| chr4 | 63985315  | 63985716  | .    | .        | .        | .         | .           | .              | . |
| chr4 | 63999529  | 63999930  | .    | .        | .        | .         | .           | .              | . |
| chr4 | 64158749  | 64159150  | chr4 | 64158708 | 64159112 | SYNREP_MM | Satellite   | Satellite      |   |
| chr4 | 64158749  | 64159150  | chr4 | 64159104 | 64159171 | Lx6       | LINE        | L1             |   |
| chr4 | 64562059  | 64562460  | .    | .        | .        | .         | .           | .              | . |
| chr4 | 64903827  | 64904228  | .    | .        | .        | .         | .           | .              | . |
| chr4 | 64927994  | 64928395  | .    | .        | .        | .         | .           | .              | . |
| chr4 | 65138197  | 65138598  | .    | .        | .        | .         | .           | .              | . |
| chr4 | 66555639  | 66556040  | chr4 | 66555679 | 66555699 | (T)n      | Simple_repe | Simple_repeat  |   |
| chr4 | 66608781  | 66609182  | chr4 | 66608968 | 66609088 | MIRb      | SINE        | MIR            |   |
| chr4 | 67683975  | 67684376  | .    | .        | .        | .         | .           | .              | . |
| chr4 | 68196866  | 68197267  | .    | .        | .        | .         | .           | .              | . |
| chr4 | 68326289  | 68326690  | .    | .        | .        | .         | .           | .              | . |
| chr4 | 68381900  | 68382301  | chr4 | 68382096 | 68382550 | MT2A      | LTR         | ERV_L          |   |
| chr4 | 70039048  | 70039449  | chr4 | 70039150 | 70039288 | GSAT_MM   | Satellite   | Satellite      |   |
| chr4 | 70792946  | 70793347  | chr4 | 70793216 | 70793371 | MER3      | DNA         | MER1_type      |   |
| chr4 | 80617580  | 80617981  | .    | .        | .        | .         | .           | .              | . |
| chr4 | 81680871  | 81681272  | chr4 | 81680956 | 81680987 | (CA)n     | Simple_repe | Simple_repeat  |   |
| chr4 | 82948692  | 82949093  | .    | .        | .        | .         | .           | .              | . |
| chr4 | 82954823  | 82955224  | chr4 | 82954585 | 82955002 | MTC       | LTR         | MaLR           |   |
| chr4 | 83026309  | 83026710  | chr4 | 83026255 | 83026393 | MER5B     | DNA         | MER1_type      |   |
| chr4 | 83026309  | 83026710  | chr4 | 83026570 | 83026680 | ORR1E     | LTR         | MaLR           |   |
| chr4 | 83026309  | 83026710  | chr4 | 83026680 | 83026809 | B1_Mur4   | SINE        | Alu            |   |
| chr4 | 84169052  | 84169453  | .    | .        | .        | .         | .           | .              | . |
| chr4 | 84387281  | 84387682  | .    | .        | .        | .         | .           | .              | . |
| chr4 | 87080827  | 87081228  | chr4 | 87080758 | 87080845 | MIRc      | SINE        | MIR            |   |
| chr4 | 87080827  | 87081228  | chr4 | 87081015 | 87081158 | MER58A    | DNA         | MER1_type      |   |
| chr4 | 87484720  | 87485121  | chr4 | 87484865 | 87484934 | Charlie9  | DNA         | MER1_type      |   |
| chr4 | 87859739  | 87860140  | chr4 | 87859675 | 87859782 | MER33     | DNA         | MER1_type      |   |
| chr4 | 87859739  | 87860140  | chr4 | 87859796 | 87860069 | RMER15    | LTR         | ERV_L          |   |
| chr4 | 88605556  | 88605957  | .    | .        | .        | .         | .           | .              | . |
| chr4 | 88668407  | 88668808  | chr4 | 88668383 | 88668433 | L1Md_F2   | LINE        | L1             |   |
| chr4 | 89127132  | 89127533  | chr4 | 89127072 | 89127213 | MIRb      | SINE        | MIR            |   |
| chr4 | 89127132  | 89127533  | chr4 | 89127219 | 89127283 | Lx9       | LINE        | L1             |   |
| chr4 | 89127132  | 89127533  | chr4 | 89127283 | 89127465 | (GA)n     | Simple_repe | Simple_repeat  |   |
| chr4 | 89127132  | 89127533  | chr4 | 89127532 | 89127571 | AT_rich   | Low_comple  | Low_complexity |   |
| chr4 | 89153655  | 89154056  | .    | .        | .        | .         | .           | .              | . |
| chr4 | 89181641  | 89182042  | .    | .        | .        | .         | .           | .              | . |
| chr4 | 91223649  | 91224050  | .    | .        | .        | .         | .           | .              | . |
| chr4 | 94668154  | 94668555  | .    | .        | .        | .         | .           | .              | . |
| chr4 | 94702044  | 94702445  | chr4 | 94702198 | 94702241 | L2b       | LINE        | L2             |   |
| chr4 | 94771940  | 94772341  | .    | .        | .        | .         | .           | .              | . |
| chr4 | 94870184  | 94870585  | chr4 | 94870325 | 94870397 | MLT1A1    | LTR         | MaLR           |   |
| chr4 | 94984441  | 94984842  | .    | .        | .        | .         | .           | .              | . |
| chr4 | 95083775  | 95084176  | .    | .        | .        | .         | .           | .              | . |
| chr4 | 95093259  | 95093660  | .    | .        | .        | .         | .           | .              | . |
| chr4 | 97572484  | 97572885  | .    | .        | .        | .         | .           | .              | . |
| chr4 | 97670738  | 97671139  | .    | .        | .        | .         | .           | .              | . |
| chr4 | 98369135  | 98369536  | .    | .        | .        | .         | .           | .              | . |
| chr4 | 98418520  | 98418921  | chr4 | 98418664 | 98418771 | MLT1J     | LTR         | MaLR           |   |
| chr4 | 98758063  | 98758464  | chr4 | 98758043 | 98758321 | L1MC2     | LINE        | L1             |   |
| chr4 | 98758063  | 98758464  | chr4 | 98758321 | 98758601 | MTD       | LTR         | MaLR           |   |
| chr4 | 99946508  | 99946909  | .    | .        | .        | .         | .           | .              | . |
| chr4 | 100263457 | 100263858 | .    | .        | .        | .         | .           | .              | . |
| chr4 | 100875383 | 100875784 | .    | .        | .        | .         | .           | .              | . |

|      |           |            |      |           |           |             |             |                |
|------|-----------|------------|------|-----------|-----------|-------------|-------------|----------------|
| chr4 | 100978771 | 100979172  | chr4 | 100978712 | 100978826 | RSINE1      | SINE        | B4             |
| chr4 | 101042352 | 101042753  | chr4 | 101042148 | 101042359 | L1ME1       | LINE        | L1             |
| chr4 | 101042352 | 101042753  | chr4 | 101042381 | 101042394 | RSINE1      | SINE        | B4             |
| chr4 | 101042352 | 101042753  | chr4 | 101042394 | 101042444 | (GA)n       | Simple_repe | Simple_repeat  |
| chr4 | 101042352 | 101042753  | chr4 | 101042444 | 101042590 | RSINE1      | SINE        | B4             |
| chr4 | 101042352 | 101042753  | chr4 | 101042700 | 101042840 | L1ME1       | LINE        | L1             |
| chr4 | 101242634 | 101243035  | chr4 | 101242781 | 101242867 | MLT1J       | LTR         | MaLR           |
| chr4 | 101912212 | 1019122613 | .    | .         | .         | .           | .           | .              |
| chr4 | 102559446 | 102559847  | chr4 | 102559592 | 102559809 | MIR         | SINE        | MIR            |
| chr4 | 102937757 | 102938158  | .    | .         | .         | .           | .           | .              |
| chr4 | 104963950 | 104964351  | chr4 | 104963993 | 104964018 | (A)n        | Simple_repe | Simple_repeat  |
| chr4 | 104963950 | 104964351  | chr4 | 104964233 | 104964330 | MIRc        | SINE        | MIR            |
| chr4 | 105123444 | 105123845  | chr4 | 105123448 | 105123545 | BIF2        | SINE        | Alu            |
| chr4 | 105241943 | 105242344  | chr4 | 105241888 | 105242070 | MIR         | SINE        | MIR            |
| chr4 | 105283508 | 105283909  | .    | .         | .         | .           | .           | .              |
| chr4 | 105313430 | 105313831  | .    | .         | .         | .           | .           | .              |
| chr4 | 105378722 | 105379123  | .    | .         | .         | .           | .           | .              |
| chr4 | 106202354 | 106202755  | .    | .         | .         | .           | .           | .              |
| chr4 | 106286771 | 106287172  | chr4 | 106286603 | 106286791 | MIRb        | SINE        | MIR            |
| chr4 | 106500203 | 106500604  | .    | .         | .         | .           | .           | .              |
| chr4 | 106512495 | 106512896  | chr4 | 106512768 | 106512818 | GC_rich     | Low_comple  | Low_complexity |
| chr4 | 106781071 | 106781472  | .    | .         | .         | .           | .           | .              |
| chr4 | 106836568 | 106836969  | .    | .         | .         | .           | .           | .              |
| chr4 | 106958117 | 106958518  | chr4 | 106958010 | 106958148 | B1_Mus2     | SINE        | Alu            |
| chr4 | 106958117 | 106958518  | chr4 | 106958320 | 106958373 | RSINE1      | SINE        | B4             |
| chr4 | 106958117 | 106958518  | chr4 | 106958425 | 106958534 | PB1D10      | SINE        | Alu            |
| chr4 | 107125745 | 107126146  | chr4 | 107125814 | 107125837 | GC_rich     | Low_comple  | Low_complexity |
| chr4 | 107140889 | 107141290  | .    | .         | .         | .           | .           | .              |
| chr4 | 107196313 | 107196714  | .    | .         | .         | .           | .           | .              |
| chr4 | 107537522 | 107537923  | chr4 | 107537778 | 107538130 | MTC         | LTR         | MaLR           |
| chr4 | 107657027 | 107657428  | chr4 | 107657035 | 107657133 | MER121      | Unknown     | Unknown        |
| chr4 | 107657027 | 107657428  | chr4 | 107657156 | 107657199 | (TG)n       | Simple_repe | Simple_repeat  |
| chr4 | 107730772 | 107731173  | chr4 | 107730673 | 107731031 | MTEB        | LTR         | MaLR           |
| chr4 | 107730772 | 107731173  | chr4 | 107731031 | 107731322 | L1MB5       | LINE        | L1             |
| chr4 | 107743796 | 107744197  | .    | .         | .         | .           | .           | .              |
| chr4 | 108632405 | 108632806  | .    | .         | .         | .           | .           | .              |
| chr4 | 108886566 | 108886967  | chr4 | 108886571 | 108886702 | URR1B       | DNA         | MER1_type      |
| chr4 | 108886566 | 108886967  | chr4 | 108886866 | 108887118 | MLT1A1      | LTR         | MaLR           |
| chr4 | 109154118 | 109154519  | .    | .         | .         | .           | .           | .              |
| chr4 | 109755544 | 109755945  | chr4 | 109755564 | 109755675 | PB1D7       | SINE        | Alu            |
| chr4 | 111318309 | 111318710  | chr4 | 111318444 | 111318499 | (CA)n       | Simple_repe | Simple_repeat  |
| chr4 | 111318309 | 111318710  | chr4 | 111318500 | 111318667 | MER20       | DNA         | MER1_type      |
| chr4 | 113608599 | 113609000  | chr4 | 113608337 | 113609221 | MurERV4-int | LTR         | ERVK           |
| chr4 | 113971744 | 113972145  | .    | .         | .         | .           | .           | .              |
| chr4 | 113972909 | 113973310  | chr4 | 113972925 | 113973110 | L1MA6       | LINE        | L1             |
| chr4 | 114018323 | 114018724  | .    | .         | .         | .           | .           | .              |
| chr4 | 114032347 | 114032748  | .    | .         | .         | .           | .           | .              |
| chr4 | 115595359 | 115595760  | chr4 | 115595682 | 115595748 | MIRb        | SINE        | MIR            |
| chr4 | 115657571 | 115657972  | chr4 | 115657532 | 115657681 | L1ME1       | LINE        | L1             |
| chr4 | 115657571 | 115657972  | chr4 | 115657681 | 115658016 | ORR1E       | LTR         | MaLR           |
| chr4 | 115973450 | 115973851  | .    | .         | .         | .           | .           | .              |
| chr4 | 116050590 | 116050991  | .    | .         | .         | .           | .           | .              |
| chr4 | 116340837 | 116341238  | chr4 | 116341195 | 116341258 | PB1D10      | SINE        | Alu            |
| chr4 | 116793045 | 116793446  | .    | .         | .         | .           | .           | .              |
| chr4 | 116862175 | 116862576  | chr4 | 116862192 | 116862226 | (GAAA)n     | Simple_repe | Simple_repeat  |
| chr4 | 116862175 | 116862576  | chr4 | 116862546 | 116862663 | U5          | snRNA       | snRNA          |
| chr4 | 116874758 | 116875159  | chr4 | 116874559 | 116874769 | Lx8         | LINE        | L1             |
| chr4 | 116874758 | 116875159  | chr4 | 116875132 | 116875249 | U5          | snRNA       | snRNA          |
| chr4 | 116883086 | 116883487  | chr4 | 116883448 | 116883565 | U5          | snRNA       | snRNA          |
| chr4 | 116891139 | 116891540  | .    | .         | .         | .           | .           | .              |
| chr4 | 116961911 | 116962312  | chr4 | 116961886 | 116961914 | GC_rich     | Low_comple  | Low_complexity |
| chr4 | 116961911 | 116962312  | chr4 | 116962092 | 116962127 | (CTGGGG)n   | Simple_repe | Simple_repeat  |
| chr4 | 117459675 | 117460076  | chr4 | 117459605 | 117459694 | FLAM_A      | SINE        | Alu            |
| chr4 | 117459675 | 117460076  | chr4 | 117459747 | 117459778 | (CCCCA)n    | Simple_repe | Simple_repeat  |
| chr4 | 117606600 | 117607001  | chr4 | 117606983 | 117607361 | L2          | LINE        | L2             |
| chr4 | 117689007 | 117689408  | chr4 | 117688935 | 117689028 | MIRb        | SINE        | MIR            |
| chr4 | 117734509 | 117734910  | chr4 | 117734636 | 117734787 | CR1_Mam     | LINE        | CR1            |
| chr4 | 118020503 | 118020904  | chr4 | 118020788 | 118020998 | LTR33       | LTR         | ERVL           |
| chr4 | 118220658 | 118221059  | chr4 | 118220677 | 118220860 | G-rich      | Low_comple  | Low_complexity |
| chr4 | 118220658 | 118221059  | chr4 | 118220896 | 118221083 | G-rich      | Low_comple  | Low_complexity |
| chr4 | 118798073 | 118798474  | chr4 | 118798051 | 118798166 | CT-rich     | Low_comple  | Low_complexity |
| chr4 | 118819403 | 118819804  | chr4 | 118819367 | 118820521 | ERVL-int    | LTR         | ERVL           |
| chr4 | 119335572 | 119335973  | chr4 | 119335490 | 119335716 | MLT2C2      | LTR         | ERVL           |
| chr4 | 119335572 | 119335973  | chr4 | 119335719 | 119336000 | L2a         | LINE        | L2             |
| chr4 | 119458918 | 119459319  | chr4 | 119459262 | 119459378 | (TCC)n      | Simple_repe | Simple_repeat  |
| chr4 | 119605232 | 119605633  | chr4 | 119605217 | 119605243 | (TG)n       | Simple_repe | Simple_repeat  |
| chr4 | 119740174 | 119740575  | .    | .         | .         | .           | .           | .              |
| chr4 | 119898063 | 119898464  | .    | .         | .         | .           | .           | .              |
| chr4 | 120053241 | 120053642  | .    | .         | .         | .           | .           | .              |
| chr4 | 120160975 | 120161376  | .    | .         | .         | .           | .           | .              |
| chr4 | 120189981 | 120190382  | .    | .         | .         | .           | .           | .              |
| chr4 | 120498137 | 120498538  | .    | .         | .         | .           | .           | .              |
| chr4 | 122485393 | 122485794  | chr4 | 122484561 | 122486220 | Lx6         | LINE        | L1             |
| chr4 | 122914743 | 122915144  | chr4 | 122914832 | 122914980 | MIR3        | SINE        | MIR            |
| chr4 | 123480773 | 123481174  | chr4 | 123480732 | 123480805 | BIF         | SINE        | Alu            |
| chr4 | 123480773 | 123481174  | chr4 | 123480896 | 123480938 | (TG)n       | Simple_repe | Simple_repeat  |
| chr4 | 123685941 | 123686342  | chr4 | 123686107 | 123686232 | MLT2F       | LTR         | ERVL           |
| chr4 | 124179023 | 124179424  | chr4 | 124178945 | 124179054 | B1_Mur1     | SINE        | Alu            |
| chr4 | 124179023 | 124179424  | chr4 | 124179183 | 124179295 | LTR33C      | LTR         | ERVL           |
| chr4 | 124179023 | 124179424  | chr4 | 124179371 | 124179635 | MLT2F       | LTR         | ERVL           |
| chr4 | 124386453 | 124386854  | chr4 | 124386717 | 124386791 | PB1D7       | SINE        | Alu            |
| chr4 | 124386453 | 124386854  | chr4 | 124386837 | 124386883 | (TG)n       | Simple_repe | Simple_repeat  |
| chr4 | 124428463 | 124428864  | .    | .         | .         | .           | .           | .              |
| chr4 | 124800552 | 124800953  | .    | .         | .         | .           | .           | .              |
| chr4 | 124808749 | 124809150  | .    | .         | .         | .           | .           | .              |



|      |           |           |      |           |           |            |             |                |
|------|-----------|-----------|------|-----------|-----------|------------|-------------|----------------|
| chr4 | 124955139 | 124955540 | chr4 | 124955034 | 124955394 | MLT1J      | LTR         | MaLR           |
| chr4 | 125091584 | 125091985 | chr4 | 125091850 | 125091870 | (T)n       | Simple_repe | Simple_repeat  |
| chr4 | 125091584 | 125091985 | chr4 | 125091543 | 125091850 | MLT1J1     | LTR         | MaLR           |
| chr4 | 125787992 | 125788393 |      |           |           |            |             |                |
| chr4 | 125809205 | 125809606 | chr4 | 125809594 | 125809711 | MIR3       | SINE        | MIR            |
| chr4 | 125827485 | 125827886 |      |           |           |            |             |                |
| chr4 | 125904302 | 125904703 |      |           |           |            |             |                |
| chr4 | 127001936 | 127002337 |      |           |           |            |             |                |
| chr4 | 127048787 | 127049188 | chr4 | 127048696 | 127048853 | RMER30     | DNA         | MER1_type      |
| chr4 | 127079821 | 127080222 | chr4 | 127080005 | 127080072 | MLT1J1     | LTR         | MaLR           |
| chr4 | 127872081 | 127872482 |      |           |           |            |             |                |
| chr4 | 128105338 | 128105739 | chr4 | 128105404 | 128105445 | ID4        | SINE        | ID             |
| chr4 | 128105338 | 128105739 | chr4 | 128105442 | 128105844 | MTD        | LTR         | MaLR           |
| chr4 | 128488640 | 128489041 | chr4 | 128488579 | 128488881 | MLT1J1     | LTR         | MaLR           |
| chr4 | 128517126 | 128517527 |      |           |           |            |             |                |
| chr4 | 128587826 | 128588227 | chr4 | 128587953 | 128588067 | LTR33B     | LTR         | ERVL           |
| chr4 | 128688808 | 128689209 | chr4 | 128689041 | 128689067 | (A)n       | Simple_repe | Simple_repeat  |
| chr4 | 128713249 | 128713650 | chr4 | 128713450 | 128713595 | MER5A      | DNA         | MER1_type      |
| chr4 | 128745291 | 128745692 |      |           |           |            |             |                |
| chr4 | 128940731 | 128941132 |      |           |           |            |             |                |
| chr4 | 129133351 | 129133752 | chr4 | 129133269 | 129133679 | RLTR15     | LTR         | ERVK           |
| chr4 | 129472532 | 129472933 |      |           |           |            |             |                |
| chr4 | 129727710 | 129728111 | chr4 | 129727631 | 129727740 | RMER12     | LTR         | ERVK           |
| chr4 | 130346068 | 130346469 |      |           |           |            |             |                |
| chr4 | 130415389 | 130415790 | chr4 | 130415480 | 130415623 | LTR33B     | LTR         | ERVL           |
| chr4 | 130752071 | 130752472 | chr4 | 130752203 | 130752375 | MLT1J      | LTR         | MaLR           |
| chr4 | 130796332 | 130796733 | chr4 | 130796479 | 130796631 | MLT1J1     | LTR         | MaLR           |
| chr4 | 135696327 | 135696728 |      |           |           |            |             |                |
| chr4 | 136789543 | 136789944 | chr4 | 136789714 | 136789793 | MLT1J2     | LTR         | MaLR           |
| chr4 | 136790307 | 136790708 | chr4 | 136790469 | 136790655 | MLT1J2     | LTR         | MaLR           |
| chr4 | 136944129 | 136944530 |      |           |           |            |             |                |
| chr4 | 137056805 | 137057206 | chr4 | 137057198 | 137057326 | YREP_Mm    | Unknown     | Unknown        |
| chr4 | 137240702 | 137241103 |      |           |           |            |             |                |
| chr4 | 137295034 | 137295435 | chr4 | 137295202 | 137295314 | MLT1J1     | LTR         | MaLR           |
| chr4 | 138762590 | 138762991 | chr4 | 138762584 | 138762721 | ID_B1      | SINE        | B4             |
| chr4 | 138762590 | 138762991 | chr4 | 138762931 | 138763034 | PB1D10     | SINE        | Alu            |
| chr4 | 139959037 | 139959438 | chr4 | 139959212 | 139959339 | MLT1J1     | LTR         | MaLR           |
| chr4 | 140111267 | 140111668 | chr4 | 140111235 | 140111377 | Tigger5    | DNA         | MER2_type      |
| chr4 | 140111267 | 140111668 | chr4 | 140111640 | 140111736 | Tigger5    | DNA         | MER2_type      |
| chr4 | 140835384 | 140835785 | chr4 | 140835541 | 140835596 | L2a        | LINE        | L2             |
| chr4 | 140835384 | 140835785 | chr4 | 140835633 | 140835704 | L1Md_A     | LINE        | L1             |
| chr4 | 140835384 | 140835785 | chr4 | 140835737 | 140835789 | CT-rich    | Low_comple  | Low_complexity |
| chr4 | 146023687 | 146024088 | chr4 | 146023622 | 146024447 | L1_Mur2    | LINE        | L1             |
| chr4 | 146893069 | 146893470 | chr4 | 146893288 | 146893337 | B1_Mus1    | SINE        | Alu            |
| chr4 | 146893069 | 146893470 | chr4 | 146893337 | 146894069 | Lx6        | LINE        | L1             |
| chr4 | 148118195 | 148118596 |      |           |           |            |             |                |
| chr4 | 148319688 | 148320089 |      |           |           |            |             |                |
| chr4 | 149194712 | 149195113 |      |           |           |            |             |                |
| chr4 | 149340659 | 149341060 |      |           |           |            |             |                |
| chr4 | 149349934 | 149350335 | chr4 | 149349910 | 149349952 | (CAAAA)n   | Simple_repe | Simple_repeat  |
| chr4 | 149349934 | 149350335 | chr4 | 149349958 | 149350125 | ID_B1      | SINE        | B4             |
| chr4 | 149349934 | 149350335 | chr4 | 149350126 | 149350242 | RMER17C    | LTR         | ERVK           |
| chr4 | 149349934 | 149350335 | chr4 | 149350242 | 149350420 | (TTCTC)n   | Simple_repe | Simple_repeat  |
| chr4 | 149423048 | 149423449 |      |           |           |            |             |                |
| chr4 | 150077533 | 150077934 |      |           |           |            |             |                |
| chr4 | 150847144 | 150847545 | chr4 | 150847371 | 150847410 | L2c        | LINE        | L2             |
| chr4 | 150847144 | 150847545 | chr4 | 150847498 | 150847570 | (CATG)n    | Simple_repe | Simple_repeat  |
| chr4 | 151769888 | 151770289 |      |           |           |            |             |                |
| chr4 | 151785116 | 151785517 |      |           |           |            |             |                |
| chr4 | 154282601 | 154283002 | chr4 | 154282658 | 154282683 | (T)n       | Simple_repe | Simple_repeat  |
| chr4 | 154282601 | 154283002 | chr4 | 154282685 | 154282832 | B1_Mm      | SINE        | Alu            |
| chr4 | 154282601 | 154283002 | chr4 | 154282929 | 154283175 | RLTR12B    | LTR         | ERVK           |
| chr4 | 154547525 | 154547926 |      |           |           |            |             |                |
| chr5 | 4530166   | 4530567   |      |           |           |            |             |                |
| chr5 | 4633719   | 4634120   | chr5 | 4633491   | 4633926   | MTE-int    | LTR         | MaLR           |
| chr5 | 4633719   | 4634120   | chr5 | 4634099   | 4634215   | RLTR10-int | LTR         | ERVK           |
| chr5 | 5265216   | 5265617   |      |           |           |            |             |                |
| chr5 | 5689091   | 5689492   | chr5 | 5689437   | 5689578   | MER5A1     | DNA         | MER1_type      |
| chr5 | 8312268   | 8312669   | chr5 | 8312407   | 8312559   | MIRc       | SINE        | MIR            |
| chr5 | 9068856   | 9069257   |      |           |           |            |             |                |
| chr5 | 14733715  | 14734116  | chr5 | 14733688  | 14733756  | (TATATG)n  | Simple_repe | Simple_repeat  |
| chr5 | 14733715  | 14734116  | chr5 | 14733767  | 14734084  | L1_Rod     | LINE        | L1             |
| chr5 | 14733715  | 14734116  | chr5 | 14734094  | 14734764  | L1M4       | LINE        | L1             |
| chr5 | 14973397  | 14973798  |      |           |           |            |             |                |
| chr5 | 15195756  | 15196157  |      |           |           |            |             |                |
| chr5 | 17061857  | 17062258  |      |           |           |            |             |                |
| chr5 | 19388570  | 19388971  | chr5 | 19387674  | 19389671  | L1Md_F2    | LINE        | L1             |
| chr5 | 19762193  | 19762594  |      |           |           |            |             |                |
| chr5 | 20650454  | 20650855  | chr5 | 20650373  | 20650638  | MLT1N2     | LTR         | MaLR           |
| chr5 | 20650454  | 20650855  | chr5 | 20650765  | 20650966  | MIR        | SINE        | MIR            |
| chr5 | 20680832  | 20681233  | chr5 | 20680931  | 20680975  | (CA)n      | Simple_repe | Simple_repeat  |
| chr5 | 20993156  | 20993557  |      |           |           |            |             |                |
| chr5 | 22892773  | 22893174  |      |           |           |            |             |                |
| chr5 | 23805509  | 23805910  | chr5 | 23805548  | 23805587  | (A)n       | Simple_repe | Simple_repeat  |
| chr5 | 23805509  | 23805910  | chr5 | 23805695  | 23805763  | ORR1C2     | LTR         | MaLR           |
| chr5 | 23805509  | 23805910  | chr5 | 23805809  | 23806004  | MER20      | DNA         | MER1_type      |
| chr5 | 23825874  | 23826275  |      |           |           |            |             |                |
| chr5 | 23866389  | 23866790  |      |           |           |            |             |                |
| chr5 | 23911230  | 23911631  |      |           |           |            |             |                |
| chr5 | 24327339  | 24327740  | chr5 | 24327718  | 24327753  | (A)n       | Simple_repe | Simple_repeat  |
| chr5 | 25381743  | 25382144  | chr5 | 25381880  | 25382050  | (CATCC)n   | Simple_repe | Simple_repeat  |
| chr5 | 28369522  | 28369923  | chr5 | 28369697  | 28369815  | PB1D7      | SINE        | Alu            |
| chr5 | 28369522  | 28369923  | chr5 | 28369828  | 28369954  | ID_B1      | SINE        | B4             |
| chr5 | 30169242  | 30169643  |      |           |           |            |             |                |
| chr5 | 31108318  | 31108719  | chr5 | 31108099  | 31108348  | L1M4       | LINE        | L1             |

|      |          |          |      |          |          |            |                           |                |
|------|----------|----------|------|----------|----------|------------|---------------------------|----------------|
| chr5 | 31108318 | 31108719 | chr5 | 31108348 | 31108403 | (CA)n      | Simple_repe:Simple_repeat |                |
| chr5 | 31218306 | 31218707 |      |          |          |            |                           |                |
| chr5 | 31230302 | 31230703 |      |          |          |            |                           |                |
| chr5 | 31302561 | 31302962 | chr5 | 31302871 | 31302934 | BLACKJACK  | DNA                       | AcHobo         |
| chr5 | 31302561 | 31302962 | chr5 | 31302940 | 31303245 | Lx8        | LINE                      | L1             |
| chr5 | 31878928 | 31879329 | chr5 | 31879081 | 31879124 | (TG)n      | Simple_repe:Simple_repeat |                |
| chr5 | 31932302 | 31932703 | chr5 | 31932244 | 31932331 | (GA)n      | Simple_repe:Simple_repeat |                |
| chr5 | 32049457 | 32049858 | chr5 | 32049428 | 32049623 | Lx9        | LINE                      | L1             |
| chr5 | 32049457 | 32049858 | chr5 | 32049659 | 32050456 | L1MEc      | LINE                      | L1             |
| chr5 | 32286760 | 32287161 |      |          |          |            |                           |                |
| chr5 | 32479251 | 32479652 | chr5 | 32479190 | 32479374 | MLT1B      | LTR                       | MaLR           |
| chr5 | 32479251 | 32479652 | chr5 | 32479428 | 32479505 | MIR        | SINE                      | MIR            |
| chr5 | 32479251 | 32479652 | chr5 | 32479569 | 32479631 | ID4        | SINE                      | ID             |
| chr5 | 32498301 | 32498702 | chr5 | 32498282 | 32498396 | L2b        | LINE                      | L2             |
| chr5 | 32498301 | 32498702 | chr5 | 32498552 | 32498618 | CT-rich    | Low_comple                | Low_complexity |
| chr5 | 32719304 | 32719705 | chr5 | 32719527 | 32719626 | Tigger16b  | DNA                       | Tigger         |
| chr5 | 32719304 | 32719705 | chr5 | 32719636 | 32719671 | (TTTG)n    | Simple_repe:Simple_repeat |                |
| chr5 | 32719304 | 32719705 | chr5 | 32719676 | 32719741 | ID4        | SINE                      | ID             |
| chr5 | 33068812 | 33069213 | chr5 | 33068742 | 33068864 | B1_Mur4    | SINE                      | Alu            |
| chr5 | 33071443 | 33071844 |      |          |          |            |                           |                |
| chr5 | 33076583 | 33076984 |      |          |          |            |                           |                |
| chr5 | 33088309 | 33088710 | chr5 | 33088653 | 33088682 | GC-rich    | Low_comple                | Low_complexity |
| chr5 | 33200493 | 33200894 | chr5 | 33200682 | 33200728 | RLTR42     | LTR                       | ERVK           |
| chr5 | 33200493 | 33200894 | chr5 | 33200760 | 33200858 | RLTR42-int | LTR                       | ERVK           |
| chr5 | 33200493 | 33200894 | chr5 | 33200858 | 33200924 | T-rich     | Low_comple                | Low_complexity |
| chr5 | 33581617 | 33582018 |      |          |          |            |                           |                |
| chr5 | 34877656 | 34878057 |      |          |          |            |                           |                |
| chr5 | 34908688 | 34909089 | chr5 | 34908644 | 34908729 | L1ME3A     | LINE                      | L1             |
| chr5 | 34908688 | 34909089 | chr5 | 34908768 | 34908978 | MamGypLTR  | LTR                       | Gypsy          |
| chr5 | 34908688 | 34909089 | chr5 | 34909032 | 34909233 | B3         | SINE                      | B2             |
| chr5 | 35332191 | 35332592 |      |          |          |            |                           |                |
| chr5 | 36147861 | 36148262 | chr5 | 36148209 | 36148286 | L1MB8      | LINE                      | L1             |
| chr5 | 36699437 | 36699838 |      |          |          |            |                           |                |
| chr5 | 37113660 | 37114061 |      |          |          |            |                           |                |
| chr5 | 37682239 | 37682640 |      |          |          |            |                           |                |
| chr5 | 38945104 | 38945505 |      |          |          |            |                           |                |
| chr5 | 53046211 | 53046612 | chr5 | 53046325 | 53046444 | PB1        | SINE                      | Alu            |
| chr5 | 53046211 | 53046612 | chr5 | 53046380 | 53046459 | B4A        | SINE                      | B4             |
| chr5 | 53762841 | 53763242 |      |          |          |            |                           |                |
| chr5 | 53772645 | 53773046 |      |          |          |            |                           |                |
| chr5 | 53821345 | 53821746 |      |          |          |            |                           |                |
| chr5 | 53848621 | 53849022 |      |          |          |            |                           |                |
| chr5 | 53871077 | 53871478 |      |          |          |            |                           |                |
| chr5 | 53882077 | 53882478 | chr5 | 53882406 | 53882503 | CT-rich    | Low_comple                | Low_complexity |
| chr5 | 53934223 | 53934624 | chr5 | 53933944 | 53934357 | RMER10A    | LTR                       | ERVL           |
| chr5 | 54362497 | 54362898 | chr5 | 54362871 | 54362907 | (CAA)n     | Simple_repe:Simple_repeat |                |
| chr5 | 58990940 | 58991341 | chr5 | 58990633 | 58991539 | Lx7        | LINE                      | L1             |
| chr5 | 64925639 | 64926040 | chr5 | 64925227 | 64925710 | RLTR20A    | LTR                       | ERVK           |
| chr5 | 64925639 | 64926040 | chr5 | 64925714 | 64925977 | MER97c     | DNA                       | MER1_type?     |
| chr5 | 64925639 | 64926040 | chr5 | 64925981 | 64926115 | B1F        | SINE                      | Alu            |
| chr5 | 65258464 | 65258865 |      |          |          |            |                           |                |
| chr5 | 65792857 | 65793258 |      |          |          |            |                           |                |
| chr5 | 65849033 | 65849434 | chr5 | 65849262 | 65849356 | L2         | LINE                      | L2             |
| chr5 | 66323653 | 66324054 | chr5 | 66323754 | 66324166 | MLT1J      | LTR                       | MaLR           |
| chr5 | 66437537 | 66437938 |      |          |          |            |                           |                |
| chr5 | 66936744 | 66937145 |      |          |          |            |                           |                |
| chr5 | 67585281 | 67585682 | chr5 | 67585358 | 67585399 | (CA)n      | Simple_repe:Simple_repeat |                |
| chr5 | 67585281 | 67585682 | chr5 | 67585453 | 67585614 | MLT1J      | LTR                       | MaLR           |
| chr5 | 72641369 | 72641770 |      |          |          |            |                           |                |
| chr5 | 73116666 | 73117067 |      |          |          |            |                           |                |
| chr5 | 73247058 | 73247459 |      |          |          |            |                           |                |
| chr5 | 73735764 | 73736165 |      |          |          |            |                           |                |
| chr5 | 73792553 | 73792954 | chr5 | 73792411 | 73792618 | MTEb       | LTR                       | MaLR           |
| chr5 | 73792553 | 73792954 | chr5 | 73792837 | 73793478 | L1MB8      | LINE                      | L1             |
| chr5 | 74438950 | 74439351 | chr5 | 74438899 | 74439249 | RMER15     | LTR                       | ERVL           |
| chr5 | 74438950 | 74439351 | chr5 | 74439249 | 74439440 | B2_Mm2     | SINE                      | B2             |
| chr5 | 74888695 | 74889096 |      |          |          |            |                           |                |
| chr5 | 75149801 | 75150202 | chr5 | 75150034 | 75150175 | B1F1       | SINE                      | Alu            |
| chr5 | 75188317 | 75188718 |      |          |          |            |                           |                |
| chr5 | 75442664 | 75443065 |      |          |          |            |                           |                |
| chr5 | 76775083 | 76775484 |      |          |          |            |                           |                |
| chr5 | 76818666 | 76819067 |      |          |          |            |                           |                |
| chr5 | 77017920 | 77018321 | chr5 | 77017959 | 77018009 | GC-rich    | Low_comple                | Low_complexity |
| chr5 | 77017920 | 77018321 | chr5 | 77018094 | 77018120 | (TCCG)n    | Simple_repe:Simple_repeat |                |
| chr5 | 77796659 | 77797060 |      |          |          |            |                           |                |
| chr5 | 81112817 | 81113218 | chr5 | 81113074 | 81113541 | RMER15     | LTR                       | ERVL           |
| chr5 | 86196165 | 86196566 | chr5 | 86196323 | 86196574 | B4A        | SINE                      | B4             |
| chr5 | 86196165 | 86196566 | chr5 | 86196174 | 86196240 | AT-rich    | Low_comple                | Low_complexity |
| chr5 | 89412076 | 89412477 | chr5 | 89411741 | 89412153 | MTB_Mm     | LTR                       | MaLR           |
| chr5 | 89906462 | 89906863 | chr5 | 89906402 | 89906571 | L2a        | LINE                      | L2             |
| chr5 | 89965045 | 89965446 | chr5 | 89965211 | 89965418 | 7SLRNA     | srpRNA                    | srpRNA         |
| chr5 | 89965045 | 89965446 | chr5 | 89965433 | 89965478 | (TG)n      | Simple_repe:Simple_repeat |                |
| chr5 | 89971497 | 89971898 | chr5 | 89971663 | 89971691 | (A)n       | Simple_repe:Simple_repeat |                |
| chr5 | 90812087 | 90812488 | chr5 | 90812186 | 90812269 | L2b        | LINE                      | L2             |
| chr5 | 91040298 | 91040699 |      |          |          |            |                           |                |
| chr5 | 91090441 | 91090842 | chr5 | 91090652 | 91090801 | MIRb       | SINE                      | MIR            |
| chr5 | 91118866 | 91119267 |      |          |          |            |                           |                |
| chr5 | 91305057 | 91305458 |      |          |          |            |                           |                |
| chr5 | 91539027 | 91539428 |      |          |          |            |                           |                |
| chr5 | 91749353 | 91749754 | chr5 | 91749666 | 91749874 | URR1A      | DNA                       | MER1_type      |
| chr5 | 92649571 | 92649972 | chr5 | 92649841 | 92649901 | (TG)n      | Simple_repe:Simple_repeat |                |
| chr5 | 93724687 | 93725088 | chr5 | 93724836 | 93725105 | MTE2b      | LTR                       | MaLR           |
| chr5 | 97384340 | 97384741 |      |          |          |            |                           |                |
| chr5 | 99319558 | 99319959 | chr5 | 99319573 | 99319611 | (GA)n      | Simple_repe:Simple_repeat |                |
| chr5 | 99319558 | 99319959 | chr5 | 99319666 | 99319823 | MIR        | SINE                      | MIR            |

|      |           |           |      |           |           |           |             |                |
|------|-----------|-----------|------|-----------|-----------|-----------|-------------|----------------|
| chr5 | 99327048  | 99327449  | chr5 | 99327351  | 99327452  | L2c       | LINE        | L2             |
| chr5 | 100996232 | 100996633 | chr5 | 100996211 | 100996268 | (TCTCTG)n | Simple_repe | Simple_repeat  |
| chr5 | 100996232 | 100996633 | chr5 | 100996269 | 100996295 | (TG)n     | Simple_repe | Simple_repeat  |
| chr5 | 100996232 | 100996633 | chr5 | 100996307 | 100996391 | Lx8       | LINE        | L1             |
| chr5 | 101051829 | 101052230 | chr5 | 101051852 | 101051881 | AT_rich   | Low_comple  | Low_complexity |
| chr5 | 101051829 | 101052230 | chr5 | 101052090 | 101052294 | MTEa      | LTR         | MaLR           |
| chr5 | 102802713 | 102803114 | chr5 | 102802861 | 102802929 | MLT1J     | LTR         | MaLR           |
| chr5 | 102802713 | 102803114 | chr5 | 102802862 | 102802939 | LTR33B    | LTR         | ERVL           |
| chr5 | 103422784 | 103423185 | chr5 | 103422901 | 103423073 | B3        | SINE        | B2             |
| chr5 | 104203743 | 104204144 | .    | .         | .         | .         | .           | .              |
| chr5 | 104484192 | 104484593 | chr5 | 104484130 | 104484394 | B4A       | SINE        | B4             |
| chr5 | 104803296 | 104803697 | chr5 | 104803294 | 104803377 | MIRc      | SINE        | MIR            |
| chr5 | 104809622 | 104810023 | chr5 | 104809933 | 104809964 | AT_rich   | Low_comple  | Low_complexity |
| chr5 | 104861852 | 104862253 | .    | .         | .         | .         | .           | .              |
| chr5 | 105000418 | 105000819 | chr5 | 105000283 | 105000589 | RMER13A   | LTR         | ERVK           |
| chr5 | 105929312 | 105929713 | chr5 | 105929708 | 105929934 | MER21B    | LTR         | ERV1           |
| chr5 | 106208343 | 106208744 | chr5 | 106208706 | 106208804 | L1MC4a    | LINE        | L1             |
| chr5 | 107420500 | 107420901 | .    | .         | .         | .         | .           | .              |
| chr5 | 107456524 | 107456925 | chr5 | 107456467 | 107456799 | RLTR15    | LTR         | ERVK           |
| chr5 | 107456524 | 107456925 | chr5 | 107456815 | 107456937 | B3A       | SINE        | B2             |
| chr5 | 107508269 | 107508670 | .    | .         | .         | .         | .           | .              |
| chr5 | 107516198 | 107516599 | .    | .         | .         | .         | .           | .              |
| chr5 | 107553393 | 107553794 | chr5 | 107553199 | 107553411 | B3        | SINE        | B2             |
| chr5 | 107553393 | 107553794 | chr5 | 107553436 | 107553475 | ID        | SINE        | ID             |
| chr5 | 107586508 | 107586909 | .    | .         | .         | .         | .           | .              |
| chr5 | 107625155 | 107625556 | chr5 | 107625553 | 107625592 | (GA)n     | Simple_repe | Simple_repeat  |
| chr5 | 107630085 | 107630486 | chr5 | 107630073 | 107630362 | ORR1E     | LTR         | MaLR           |
| chr5 | 107630085 | 107630486 | chr5 | 107630364 | 107630495 | RSINE1    | SINE        | B4             |
| chr5 | 108429942 | 108430343 | chr5 | 108430031 | 108430080 | RSINE1    | SINE        | B4             |
| chr5 | 108429942 | 108430343 | chr5 | 108430097 | 108430122 | (A)n      | Simple_repe | Simple_repeat  |
| chr5 | 108429942 | 108430343 | chr5 | 108430301 | 108430385 | RLTR42    | LTR         | ERVK           |
| chr5 | 109151020 | 109151421 | chr5 | 109150990 | 109151185 | B4A       | SINE        | B4             |
| chr5 | 110922854 | 110923255 | chr5 | 110923169 | 110923283 | CT-rich   | Low_comple  | Low_complexity |
| chr5 | 110993946 | 110994347 | .    | .         | .         | .         | .           | .              |
| chr5 | 111657351 | 111657752 | .    | .         | .         | .         | .           | .              |
| chr5 | 111676986 | 111677387 | chr5 | 111676947 | 111677205 | L1Mdb     | LINE        | L1             |
| chr5 | 111918059 | 111918460 | chr5 | 111918033 | 111918282 | MLT1J2    | LTR         | MaLR           |
| chr5 | 112228565 | 112228966 | .    | .         | .         | .         | .           | .              |
| chr5 | 112309143 | 112309544 | chr5 | 112309322 | 112309419 | MIRc      | SINE        | MIR            |
| chr5 | 112319765 | 112320166 | chr5 | 112319453 | 112319773 | (TCCA)n   | Simple_repe | Simple_repeat  |
| chr5 | 112422951 | 112423352 | chr5 | 112423060 | 112423190 | MLT1J     | LTR         | MaLR           |
| chr5 | 112669827 | 112670228 | .    | .         | .         | .         | .           | .              |
| chr5 | 113700093 | 113700494 | chr5 | 113699918 | 113700100 | B3A       | SINE        | B2             |
| chr5 | 113700093 | 113700494 | chr5 | 113700252 | 113700370 | MLT1K     | LTR         | MaLR           |
| chr5 | 114263644 | 114264045 | chr5 | 114263624 | 114263701 | B4        | SINE        | B4             |
| chr5 | 114263644 | 114264045 | chr5 | 114263746 | 114263927 | B3A       | SINE        | B2             |
| chr5 | 114263644 | 114264045 | chr5 | 114263950 | 114264157 | B3        | SINE        | B2             |
| chr5 | 114622939 | 114623340 | chr5 | 114622859 | 114622987 | B1_Mus2   | SINE        | Alu            |
| chr5 | 114622939 | 114623340 | chr5 | 114622987 | 114623015 | (CAAA)n   | Simple_repe | Simple_repeat  |
| chr5 | 114622939 | 114623340 | chr5 | 114623089 | 114623185 | MT2B2     | LTR         | ERVL           |
| chr5 | 114622939 | 114623340 | chr5 | 114623114 | 114623206 | PB1D10    | SINE        | Alu            |
| chr5 | 114622939 | 114623340 | chr5 | 114623215 | 114623296 | L1_Mus1   | LINE        | L1             |
| chr5 | 114622939 | 114623340 | chr5 | 114623300 | 114623486 | B2_Mm1a   | SINE        | B2             |
| chr5 | 115939161 | 115939562 | chr5 | 115939467 | 115939611 | U4        | snRNA       | snRNA          |
| chr5 | 115984821 | 115985222 | .    | .         | .         | .         | .           | .              |
| chr5 | 116804497 | 116804898 | chr5 | 116804718 | 116804812 | MLT1A1    | LTR         | MaLR           |
| chr5 | 116821474 | 116821875 | chr5 | 116821346 | 116821744 | MLT1J1    | LTR         | MaLR           |
| chr5 | 116821474 | 116821875 | chr5 | 116821810 | 116822065 | L2        | LINE        | L2             |
| chr5 | 116837522 | 116837923 | chr5 | 116837299 | 116837589 | B4        | SINE        | B4             |
| chr5 | 116896567 | 116896968 | .    | .         | .         | .         | .           | .              |
| chr5 | 117608459 | 117608860 | chr5 | 117608459 | 117608502 | (TG)n     | Simple_repe | Simple_repeat  |
| chr5 | 118399347 | 118399748 | chr5 | 118399342 | 118399525 | LTR16E2   | LTR         | ERVL           |
| chr5 | 118863372 | 118863773 | chr5 | 118863239 | 118863377 | Lx9       | LINE        | L1             |
| chr5 | 118863372 | 118863773 | chr5 | 118863525 | 118863686 | MLT1J1    | LTR         | MaLR           |
| chr5 | 118906828 | 118907229 | chr5 | 118906598 | 118906944 | ORR1E     | LTR         | MaLR           |
| chr5 | 118906828 | 118907229 | chr5 | 118907032 | 118907204 | URR1A     | DNA         | MER1_type      |
| chr5 | 118909088 | 118909489 | chr5 | 118909268 | 118909464 | RMER17C   | LTR         | ERVK           |
| chr5 | 118915204 | 118915605 | chr5 | 118915447 | 118915474 | (TG)n     | Simple_repe | Simple_repeat  |
| chr5 | 118928223 | 118928624 | chr5 | 118928553 | 118928579 | (TTTTG)n  | Simple_repe | Simple_repeat  |
| chr5 | 119062962 | 119063363 | .    | .         | .         | .         | .           | .              |
| chr5 | 119114025 | 119114426 | .    | .         | .         | .         | .           | .              |
| chr5 | 119666055 | 119666456 | chr5 | 119666076 | 119666096 | (GGGTG)n  | Simple_repe | Simple_repeat  |
| chr5 | 119666055 | 119666456 | chr5 | 119666099 | 119666339 | LTR33A    | LTR         | ERVL           |
| chr5 | 120398482 | 120398883 | chr5 | 120398631 | 120398721 | MLT1J     | LTR         | MaLR           |
| chr5 | 120428403 | 120428804 | .    | .         | .         | .         | .           | .              |
| chr5 | 120747940 | 120748341 | chr5 | 120747692 | 120747953 | MIRb      | SINE        | MIR            |
| chr5 | 121511692 | 121512093 | chr5 | 121511648 | 121511704 | (GA)n     | Simple_repe | Simple_repeat  |
| chr5 | 121511692 | 121512093 | chr5 | 121511704 | 121511858 | ORR1D1    | LTR         | MaLR           |
| chr5 | 121511692 | 121512093 | chr5 | 121511858 | 121512040 | MLT1J     | LTR         | MaLR           |
| chr5 | 121669985 | 121670386 | chr5 | 121670286 | 121670312 | (CGG)n    | Simple_repe | Simple_repeat  |
| chr5 | 121669985 | 121670386 | chr5 | 121670356 | 121670424 | (CGCGG)n  | Simple_repe | Simple_repeat  |
| chr5 | 122504401 | 122504802 | chr5 | 122504549 | 122504733 | LTR33     | LTR         | ERVL           |
| chr5 | 122585499 | 122585900 | chr5 | 122585595 | 122585638 | CT-rich   | Low_comple  | Low_complexity |
| chr5 | 122596317 | 122596718 | .    | .         | .         | .         | .           | .              |
| chr5 | 122754037 | 122754438 | .    | .         | .         | .         | .           | .              |
| chr5 | 123220797 | 123221198 | chr5 | 123221030 | 123221065 | (TCCC)n   | Simple_repe | Simple_repeat  |
| chr5 | 123507999 | 123508400 | chr5 | 123508350 | 123508451 | PB1D7     | SINE        | Alu            |
| chr5 | 124442085 | 124442486 | .    | .         | .         | .         | .           | .              |
| chr5 | 124456988 | 124457389 | .    | .         | .         | .         | .           | .              |
| chr5 | 124496970 | 124497371 | chr5 | 124497043 | 124497267 | L2b       | LINE        | L2             |
| chr5 | 124496970 | 124497371 | chr5 | 124497352 | 124497455 | L1MC3     | LINE        | L1             |
| chr5 | 124621755 | 124622156 | chr5 | 124621761 | 124621951 | MER46C    | DNA         | MER2_type      |
| chr5 | 124621755 | 124622156 | chr5 | 124622140 | 124622184 | (CA)n     | Simple_repe | Simple_repeat  |
| chr5 | 124899550 | 124899951 | chr5 | 124899519 | 124900090 | L1MB7     | LINE        | L1             |
| chr5 | 125552221 | 125552622 | .    | .         | .         | .         | .           | .              |

|      |           |           |      |           |           |                  |                           |
|------|-----------|-----------|------|-----------|-----------|------------------|---------------------------|
| chr5 | 125561882 | 125562283 | chr5 | 125561904 | 125561943 | (CCCGG)n         | Simple_repe:Simple_repeat |
| chr5 | 125726079 | 125726480 | .    | .         | .         | .                | .                         |
| chr5 | 125752013 | 125752414 | .    | .         | .         | .                | .                         |
| chr5 | 125764348 | 125764749 | chr5 | 125764533 | 125764601 | MLT1J2           | LTR MaLR                  |
| chr5 | 125873494 | 125873895 | .    | .         | .         | .                | .                         |
| chr5 | 129623245 | 129623646 | chr5 | 129622192 | 129623880 | Lx8              | LINE L1                   |
| chr5 | 131995427 | 131995828 | chr5 | 131995440 | 131995520 | CT-rich          | Low_comple Low_complexity |
| chr5 | 131995427 | 131995828 | chr5 | 131995562 | 131995660 | B1F1             | SINE Alu                  |
| chr5 | 131995427 | 131995828 | chr5 | 131995676 | 131995803 | B1F1             | SINE Alu                  |
| chr5 | 135170904 | 135171305 | chr5 | 135170628 | 135170923 | L2               | LINE L2                   |
| chr5 | 135170904 | 135171305 | chr5 | 135171084 | 135171148 | RMER15           | LTR ERVL                  |
| chr5 | 135170904 | 135171305 | chr5 | 135171153 | 135171330 | RLTR18B          | LTR ERVK                  |
| chr5 | 135393934 | 135394335 | chr5 | 135393948 | 135394070 | MLT1J2           | LTR MaLR                  |
| chr5 | 135998215 | 135998616 | .    | .         | .         | .                | .                         |
| chr5 | 136186727 | 136187128 | chr5 | 136187116 | 136187242 | B1_Mur4          | SINE Alu                  |
| chr5 | 136269460 | 136269861 | chr5 | 136269554 | 136269706 | B4               | SINE B4                   |
| chr5 | 136525835 | 136526236 | chr5 | 136525728 | 136525915 | ZP3AR            | Satellite Satellite       |
| chr5 | 136525835 | 136526236 | chr5 | 136526118 | 136526238 | RSINE1           | SINE B4                   |
| chr5 | 136527480 | 136527881 | .    | .         | .         | .                | .                         |
| chr5 | 136570553 | 136570954 | .    | .         | .         | .                | .                         |
| chr5 | 136584932 | 136585333 | chr5 | 136585166 | 136585326 | B3               | SINE B2                   |
| chr5 | 137488478 | 137488879 | chr5 | 137488471 | 137488561 | MIRb             | SINE MIR                  |
| chr5 | 137488478 | 137488879 | chr5 | 137488740 | 137488776 | (TC)n            | Simple_repe:Simple_repeat |
| chr5 | 137488478 | 137488879 | chr5 | 137488776 | 137488908 | B1_Mur4          | SINE Alu                  |
| chr5 | 137491849 | 137492250 | chr5 | 137491856 | 137491959 | MTEb             | LTR MaLR                  |
| chr5 | 137491849 | 137492250 | chr5 | 137492133 | 137492190 | ID4              | SINE ID                   |
| chr5 | 137491849 | 137492250 | chr5 | 137492198 | 137492240 | (CA)n            | Simple_repe:Simple_repeat |
| chr5 | 137491849 | 137492250 | chr5 | 137492242 | 137492280 | GA-rich          | Low_comple Low_complexity |
| chr5 | 137578812 | 137579213 | .    | .         | .         | .                | .                         |
| chr5 | 137779469 | 137779870 | chr5 | 137779431 | 137779512 | (TAGA)n          | Simple_repe:Simple_repeat |
| chr5 | 137779469 | 137779870 | chr5 | 137779771 | 137779794 | AT-rich          | Low_comple Low_complexity |
| chr5 | 138426967 | 138427368 | chr5 | 138426803 | 138427009 | URR1A            | DNA MER1_type             |
| chr5 | 138426967 | 138427368 | chr5 | 138427269 | 138427291 | AT-rich          | Low_comple Low_complexity |
| chr5 | 139201090 | 139201491 | .    | .         | .         | .                | .                         |
| chr5 | 139465438 | 139465839 | .    | .         | .         | .                | .                         |
| chr5 | 139936380 | 139936781 | chr5 | 139936752 | 139936861 | ID_B1            | SINE B4                   |
| chr5 | 142843276 | 142843677 | .    | .         | .         | .                | .                         |
| chr5 | 142921657 | 142922058 | chr5 | 142921967 | 142922071 | ZP3AR            | Satellite Satellite       |
| chr5 | 143585123 | 143585524 | .    | .         | .         | .                | .                         |
| chr5 | 143682355 | 143682756 | chr5 | 143682281 | 143682364 | (GGAA)n          | Simple_repe:Simple_repeat |
| chr5 | 143697275 | 143697676 | chr5 | 143697201 | 143697348 | B1_Mur1          | SINE Alu                  |
| chr5 | 143697275 | 143697676 | chr5 | 143697436 | 143697563 | LTR33B           | LTR ERVL                  |
| chr5 | 144236360 | 144236761 | chr5 | 144236363 | 144236474 | RSINE1           | SINE B4                   |
| chr5 | 144322549 | 144322950 | .    | .         | .         | .                | .                         |
| chr5 | 145659435 | 145659836 | .    | .         | .         | .                | .                         |
| chr5 | 146041703 | 146042104 | .    | .         | .         | .                | .                         |
| chr5 | 147072556 | 147072957 | chr5 | 147072553 | 147072941 | LSU-rRNA_Hr:rRNA | rRNA                      |
| chr5 | 147072556 | 147072957 | chr5 | 147072941 | 147072973 | (A)n             | Simple_repe:Simple_repeat |
| chr5 | 150115783 | 150116184 | .    | .         | .         | .                | .                         |
| chr5 | 150123104 | 150123505 | .    | .         | .         | .                | .                         |
| chr5 | 150142877 | 150143278 | .    | .         | .         | .                | .                         |
| chr5 | 150155729 | 150156130 | .    | .         | .         | .                | .                         |
| chr5 | 152005485 | 152005886 | .    | .         | .         | .                | .                         |
| chr5 | 152054263 | 152054664 | .    | .         | .         | .                | .                         |
| chr6 | 3151300   | 3151701   | chr6 | 3150778   | 3151677   | SSU-rRNA_Hr:rRNA | rRNA                      |
| chr6 | 3695661   | 3696062   | .    | .         | .         | .                | .                         |
| chr6 | 4369085   | 4369486   | .    | .         | .         | .                | .                         |
| chr6 | 4382164   | 4382565   | .    | .         | .         | .                | .                         |
| chr6 | 6647625   | 6648026   | .    | .         | .         | .                | .                         |
| chr6 | 8122063   | 8122464   | .    | .         | .         | .                | .                         |
| chr6 | 8445973   | 8446374   | .    | .         | .         | .                | .                         |
| chr6 | 12382382  | 12382783  | chr6 | 12382339  | 12382673  | ORR1E            | LTR MaLR                  |
| chr6 | 12382382  | 12382783  | chr6 | 12382722  | 12382980  | L1Md_F2          | LINE L1                   |
| chr6 | 12552186  | 12552587  | .    | .         | .         | .                | .                         |
| chr6 | 12971508  | 12971909  | chr6 | 12971747  | 12971886  | LFSINE_Vert      | SINE SINE                 |
| chr6 | 13633610  | 13634011  | chr6 | 13633861  | 13634084  | RMER15           | LTR ERVL                  |
| chr6 | 16560841  | 16561242  | chr6 | 16561227  | 16561331  | L2               | LINE L2                   |
| chr6 | 16571137  | 16571538  | .    | .         | .         | .                | .                         |
| chr6 | 17022776  | 17023177  | .    | .         | .         | .                | .                         |
| chr6 | 17122059  | 17122460  | .    | .         | .         | .                | .                         |
| chr6 | 17196788  | 17197189  | chr6 | 17196316  | 17197527  | Lx7              | LINE L1                   |
| chr6 | 17303826  | 17304227  | chr6 | 17303611  | 17303827  | MamGypLTR        | LTR Gypsy                 |
| chr6 | 17303826  | 17304227  | chr6 | 17303934  | 17304096  | MamGypLTR        | LTR Gypsy                 |
| chr6 | 17411394  | 17411795  | .    | .         | .         | .                | .                         |
| chr6 | 17428833  | 17429234  | chr6 | 17429133  | 17429242  | PB1D10           | SINE Alu                  |
| chr6 | 17826577  | 17826978  | chr6 | 17826815  | 17826871  | MIR3             | SINE MIR                  |
| chr6 | 22230202  | 22230603  | .    | .         | .         | .                | .                         |
| chr6 | 24577717  | 24578118  | chr6 | 24577552  | 24577786  | B2_Mm1t          | SINE B2                   |
| chr6 | 29380731  | 29381132  | .    | .         | .         | .                | .                         |
| chr6 | 30754705  | 30755106  | .    | .         | .         | .                | .                         |
| chr6 | 31008313  | 31008714  | chr6 | 31008257  | 31008439  | HAL1             | LINE L1                   |
| chr6 | 31008313  | 31008714  | chr6 | 31008473  | 31008564  | LTR33C           | LTR ERVL                  |
| chr6 | 31050319  | 31050720  | .    | .         | .         | .                | .                         |
| chr6 | 31140945  | 31141346  | chr6 | 31141102  | 31141196  | LTR33C           | LTR ERVL                  |
| chr6 | 32454260  | 32454661  | .    | .         | .         | .                | .                         |
| chr6 | 32745529  | 32745930  | chr6 | 32745498  | 32745565  | (GA)n            | Simple_repe:Simple_repeat |
| chr6 | 32885557  | 32885958  | chr6 | 32885727  | 32885910  | Tigger5          | DNA MER2_type             |
| chr6 | 34033504  | 34033905  | .    | .         | .         | .                | .                         |
| chr6 | 34293339  | 34293740  | .    | .         | .         | .                | .                         |
| chr6 | 34746870  | 34747271  | chr6 | 34746146  | 34747121  | L1McC            | LINE L1                   |
| chr6 | 37233319  | 37233720  | .    | .         | .         | .                | .                         |
| chr6 | 38037284  | 38037685  | chr6 | 38037386  | 38037735  | RLTR15           | LTR ERVK                  |
| chr6 | 39284258  | 39284659  | chr6 | 39284487  | 39284612  | B1F              | SINE Alu                  |
| chr6 | 39784612  | 39785013  | chr6 | 39784499  | 39784624  | ORR1D2           | LTR MaLR                  |
| chr6 | 39784612  | 39785013  | chr6 | 39784688  | 39784967  | RLTR15           | LTR ERVK                  |

|      |           |           |      |           |           |             |             |                |   |   |   |
|------|-----------|-----------|------|-----------|-----------|-------------|-------------|----------------|---|---|---|
| chr6 | 42331722  | 42332123  | .    | .         | .         | .           | .           | .              | . | . | . |
| chr6 | 43293580  | 43293981  | chr6 | 43293760  | 43293805  | GSAT_MM     | Satellite   | Satellite      | . | . | . |
| chr6 | 47586705  | 47587106  | .    | .         | .         | .           | .           | .              | . | . | . |
| chr6 | 47601061  | 47601462  | chr6 | 47601044  | 47601135  | (CAA)n      | Simple_repe | Simple_repeat  | . | . | . |
| chr6 | 47731240  | 47731641  | chr6 | 47731622  | 47731723  | HY3         | scRNA       | scRNA          | . | . | . |
| chr6 | 47738137  | 47738538  | chr6 | 47738068  | 47738179  | HY1         | scRNA       | scRNA          | . | . | . |
| chr6 | 48071185  | 48071586  | chr6 | 48071013  | 48071196  | B2_Mm1a     | SINE        | B2             | . | . | . |
| chr6 | 48071185  | 48071586  | chr6 | 48071395  | 48071442  | B3A         | SINE        | B2             | . | . | . |
| chr6 | 48491551  | 48491952  | .    | .         | .         | .           | .           | .              | . | . | . |
| chr6 | 49046353  | 49046754  | .    | .         | .         | .           | .           | .              | . | . | . |
| chr6 | 50204857  | 50205258  | chr6 | 50205207  | 50205304  | PB107       | SINE        | Alu            | . | . | . |
| chr6 | 51201412  | 51201813  | chr6 | 51200510  | 51201465  | MYSERV6-int | LTR         | ERVK           | . | . | . |
| chr6 | 51201412  | 51201813  | chr6 | 51201465  | 51201626  | RLTR15      | LTR         | ERVK           | . | . | . |
| chr6 | 51201412  | 51201813  | chr6 | 51201637  | 51201897  | RLTR15      | LTR         | ERVK           | . | . | . |
| chr6 | 55215095  | 55215496  | chr6 | 55215078  | 55215187  | L2b         | LINE        | L2             | . | . | . |
| chr6 | 55308674  | 55309075  | .    | .         | .         | .           | .           | .              | . | . | . |
| chr6 | 55333942  | 55334343  | .    | .         | .         | .           | .           | .              | . | . | . |
| chr6 | 56754637  | 56755038  | chr6 | 56754453  | 56754662  | ORR1C1      | LTR         | MaLR           | . | . | . |
| chr6 | 56754637  | 56755038  | chr6 | 56754719  | 56754969  | MTE2b       | LTR         | MaLR           | . | . | . |
| chr6 | 56754637  | 56755038  | chr6 | 56754971  | 56755288  | MTE2b-int   | LTR         | MaLR           | . | . | . |
| chr6 | 60637039  | 60637440  | chr6 | 60637216  | 60637324  | GSAT_MM     | Satellite   | Satellite      | . | . | . |
| chr6 | 63848163  | 63848564  | chr6 | 63848365  | 63848575  | B3          | SINE        | B2             | . | . | . |
| chr6 | 67118272  | 67118673  | chr6 | 67118509  | 67118686  | RLTR42      | LTR         | ERVK           | . | . | . |
| chr6 | 69466162  | 69466563  | chr6 | 69466309  | 69466332  | ID          | SINE        | ID             | . | . | . |
| chr6 | 69466162  | 69466563  | chr6 | 69466332  | 69466546  | 7SLRNA      | srpRNA      | srpRNA         | . | . | . |
| chr6 | 72006586  | 72006987  | chr6 | 72006880  | 72007226  | MTE2b       | LTR         | MaLR           | . | . | . |
| chr6 | 72166571  | 72166972  | .    | .         | .         | .           | .           | .              | . | . | . |
| chr6 | 72280125  | 72280526  | chr6 | 72280051  | 72280202  | B1_Mm       | SINE        | Alu            | . | . | . |
| chr6 | 72280125  | 72280526  | chr6 | 72280202  | 72280239  | B3          | SINE        | B2             | . | . | . |
| chr6 | 72280125  | 72280526  | chr6 | 72280297  | 72280409  | PB1D10      | SINE        | Alu            | . | . | . |
| chr6 | 72280125  | 72280526  | chr6 | 72280437  | 72280541  | B4A         | SINE        | B4             | . | . | . |
| chr6 | 72462451  | 72462852  | .    | .         | .         | .           | .           | .              | . | . | . |
| chr6 | 72488696  | 72489097  | .    | .         | .         | .           | .           | .              | . | . | . |
| chr6 | 72605344  | 72605745  | .    | .         | .         | .           | .           | .              | . | . | . |
| chr6 | 72693620  | 72694021  | .    | .         | .         | .           | .           | .              | . | . | . |
| chr6 | 82946622  | 82947023  | chr6 | 82946524  | 82946773  | ORR1D2      | LTR         | MaLR           | . | . | . |
| chr6 | 82964719  | 82965120  | .    | .         | .         | .           | .           | .              | . | . | . |
| chr6 | 83081226  | 83081627  | chr6 | 83081199  | 83081331  | RSINE1      | SINE        | B4             | . | . | . |
| chr6 | 83081226  | 83081627  | chr6 | 83081339  | 83081390  | (TCTG)n     | Simple_repe | Simple_repeat  | . | . | . |
| chr6 | 83228885  | 83229286  | chr6 | 83228516  | 83228886  | MTE2a       | LTR         | MaLR           | . | . | . |
| chr6 | 83228885  | 83229286  | chr6 | 83229000  | 83229170  | B3A         | SINE        | B2             | . | . | . |
| chr6 | 83228885  | 83229286  | chr6 | 83229269  | 83229524  | MER2        | DNA         | MER2_type      | . | . | . |
| chr6 | 86756481  | 86756882  | chr6 | 86756865  | 86756896  | (TG)n       | Simple_repe | Simple_repeat  | . | . | . |
| chr6 | 88074540  | 88074941  | .    | .         | .         | .           | .           | .              | . | . | . |
| chr6 | 88890538  | 88890939  | .    | .         | .         | .           | .           | .              | . | . | . |
| chr6 | 88913915  | 88914316  | chr6 | 88913843  | 88914030  | RSINE1      | SINE        | B4             | . | . | . |
| chr6 | 88913915  | 88914316  | chr6 | 88914033  | 88914191  | B4A         | SINE        | B4             | . | . | . |
| chr6 | 89018344  | 89018745  | chr6 | 89018744  | 89018795  | (GA)n       | Simple_repe | Simple_repeat  | . | . | . |
| chr6 | 89037877  | 89038278  | .    | .         | .         | .           | .           | .              | . | . | . |
| chr6 | 91151839  | 91152240  | chr6 | 91151844  | 91151987  | L2b         | LINE        | L2             | . | . | . |
| chr6 | 91151839  | 91152240  | chr6 | 91151991  | 91152138  | L1M5        | LINE        | L1             | . | . | . |
| chr6 | 91157530  | 91157931  | chr6 | 91157915  | 91157956  | MIRc        | SINE        | MIR            | . | . | . |
| chr6 | 91257995  | 91258396  | chr6 | 91258004  | 91258244  | MLT1A1      | LTR         | MaLR           | . | . | . |
| chr6 | 91438876  | 91439277  | .    | .         | .         | .           | .           | .              | . | . | . |
| chr6 | 91567154  | 91567555  | chr6 | 91567327  | 91567480  | MLT1J2      | LTR         | MaLR           | . | . | . |
| chr6 | 92191195  | 92191596  | chr6 | 92191341  | 92191411  | MLT1J       | LTR         | MaLR           | . | . | . |
| chr6 | 92240773  | 92241174  | chr6 | 92240841  | 92241004  | RLTR42-int  | LTR         | ERVK           | . | . | . |
| chr6 | 92414055  | 92414456  | .    | .         | .         | .           | .           | .              | . | . | . |
| chr6 | 93207496  | 93207897  | .    | .         | .         | .           | .           | .              | . | . | . |
| chr6 | 94175042  | 94175443  | chr6 | 94174857  | 94175116  | B4          | SINE        | B4             | . | . | . |
| chr6 | 94698419  | 94698820  | chr6 | 94698676  | 94698751  | CT-rich     | Low_comple  | Low_complexity | . | . | . |
| chr6 | 97307599  | 97308000  | chr6 | 97307542  | 97307735  | B2_Mm1t     | SINE        | B2             | . | . | . |
| chr6 | 97307599  | 97308000  | chr6 | 97307748  | 97307827  | RLTR11A     | LTR         | ERVK           | . | . | . |
| chr6 | 97307599  | 97308000  | chr6 | 97307840  | 97308074  | L1Md_A      | LINE        | L1             | . | . | . |
| chr6 | 97776527  | 97776928  | .    | .         | .         | .           | .           | .              | . | . | . |
| chr6 | 97874236  | 97874637  | chr6 | 97874219  | 97874261  | (CAAAA)n    | Simple_repe | Simple_repeat  | . | . | . |
| chr6 | 97902817  | 97903218  | .    | .         | .         | .           | .           | .              | . | . | . |
| chr6 | 99167724  | 99168125  | chr6 | 99168002  | 99168026  | (GGCTG)n    | Simple_repe | Simple_repeat  | . | . | . |
| chr6 | 99167724  | 99168125  | chr6 | 99168027  | 99168338  | B4          | SINE        | B4             | . | . | . |
| chr6 | 99334950  | 99335351  | chr6 | 99335103  | 99335248  | MER20       | DNA         | MER1_type      | . | . | . |
| chr6 | 99396746  | 99397147  | .    | .         | .         | .           | .           | .              | . | . | . |
| chr6 | 100456159 | 100456560 | chr6 | 100456308 | 100456416 | PB1         | SINE        | Alu            | . | . | . |
| chr6 | 100456159 | 100456560 | chr6 | 100456474 | 100456709 | B4          | SINE        | B4             | . | . | . |
| chr6 | 100750524 | 100750925 | .    | .         | .         | .           | .           | .              | . | . | . |
| chr6 | 103598956 | 103599357 | chr6 | 103598482 | 103598957 | L1Md_F2     | LINE        | L1             | . | . | . |
| chr6 | 103598956 | 103599357 | chr6 | 103599041 | 103599288 | SYNREP_MM   | Satellite   | Satellite      | . | . | . |
| chr6 | 108486958 | 108487359 | chr6 | 108487291 | 108487319 | (CA)n       | Simple_repe | Simple_repeat  | . | . | . |
| chr6 | 112721030 | 112721431 | chr6 | 112720901 | 112721101 | URR1A       | DNA         | MER1_type      | . | . | . |
| chr6 | 112838856 | 112839257 | .    | .         | .         | .           | .           | .              | . | . | . |
| chr6 | 112950874 | 112951275 | .    | .         | .         | .           | .           | .              | . | . | . |
| chr6 | 113640406 | 113640807 | chr6 | 113640240 | 113640677 | RLTR28B     | LTR         | ERVL           | . | . | . |
| chr6 | 114816011 | 114816412 | .    | .         | .         | .           | .           | .              | . | . | . |
| chr6 | 115234263 | 115234664 | .    | .         | .         | .           | .           | .              | . | . | . |
| chr6 | 115694507 | 115694908 | chr6 | 115694635 | 115694719 | MLT1J       | LTR         | MaLR           | . | . | . |
| chr6 | 115694507 | 115694908 | chr6 | 115694796 | 115695118 | (TG)n       | Simple_repe | Simple_repeat  | . | . | . |
| chr6 | 116216415 | 116216816 | chr6 | 116216781 | 116216904 | L1MC1       | LINE        | L1             | . | . | . |
| chr6 | 117829058 | 117829459 | chr6 | 117828919 | 117829067 | RMER5       | LTR         | ERV1           | . | . | . |
| chr6 | 118934188 | 118934589 | chr6 | 118934359 | 118934477 | MER121      | Unknown     | Unknown        | . | . | . |
| chr6 | 119291441 | 119291842 | chr6 | 119291576 | 119291677 | MLT1J       | LTR         | MaLR           | . | . | . |
| chr6 | 119338683 | 119339084 | chr6 | 119338661 | 119338687 | (CCG)n      | Simple_repe | Simple_repeat  | . | . | . |
| chr6 | 119338683 | 119339084 | chr6 | 119338711 | 119338744 | (CCG)n      | Simple_repe | Simple_repeat  | . | . | . |
| chr6 | 119346252 | 119346653 | .    | .         | .         | .           | .           | .              | . | . | . |
| chr6 | 120140913 | 120141314 | .    | .         | .         | .           | .           | .              | . | . | . |
| chr6 | 120544443 | 120544844 | chr6 | 120544437 | 120544507 | B4          | SINE        | B4             | . | . | . |
| chr6 | 120544443 | 120544844 | chr6 | 120544603 | 120544707 | PB1         | SINE        | Alu            | . | . | . |

|      |           |           |      |           |           |                  |             |                |
|------|-----------|-----------|------|-----------|-----------|------------------|-------------|----------------|
| chr6 | 120544443 | 120544844 | chr6 | 120544837 | 120545028 | B3               | SINE        | B2             |
| chr6 | 121072647 | 121073048 | chr6 | 121072748 | 121072881 | Charlie17a       | DNA         | MER1_type      |
| chr6 | 121123600 | 121124001 | chr6 | 121123949 | 121124018 | MIRc             | SINE        | MIR            |
| chr6 | 121451221 | 121451622 | chr6 | 121451381 | 121451495 | MLT1J1           | LTR         | MaLR           |
| chr6 | 122760625 | 122761026 | .    | .         | .         | .                | .           | .              |
| chr6 | 124374215 | 124374616 | chr6 | 124374170 | 124374321 | MLT1J1-int       | LTR         | MaLR           |
| chr6 | 124374215 | 124374616 | chr6 | 124374345 | 124374560 | MLT1J1           | LTR         | MaLR           |
| chr6 | 124374215 | 124374616 | chr6 | 124374574 | 124374706 | B4A              | SINE        | B4             |
| chr6 | 124755512 | 124755913 | .    | .         | .         | .                | .           | .              |
| chr6 | 125522231 | 125522632 | chr6 | 125521636 | 125522341 | L1Md_A           | LINE        | L1             |
| chr6 | 125522231 | 125522632 | chr6 | 125522626 | 125522723 | MTD              | LTR         | MaLR           |
| chr6 | 125567861 | 125568262 | chr6 | 125567987 | 125568017 | AT_rich          | Low_comple  | Low_complexity |
| chr6 | 125567861 | 125568262 | chr6 | 125568024 | 125568141 | PB1              | SINE        | Alu            |
| chr6 | 125567861 | 125568262 | chr6 | 125568164 | 125568222 | (TG)n            | Simple_repe | Simple_repeat  |
| chr6 | 125826906 | 125827307 | chr6 | 125826928 | 125827013 | (CATTC)n         | Simple_repe | Simple_repeat  |
| chr6 | 125826906 | 125827307 | chr6 | 125827015 | 125827195 | (CACTC)n         | Simple_repe | Simple_repeat  |
| chr6 | 125826906 | 125827307 | chr6 | 125827197 | 125827282 | (CATTC)n         | Simple_repe | Simple_repeat  |
| chr6 | 125826906 | 125827307 | chr6 | 125827281 | 125827349 | (TTCC)n          | Simple_repe | Simple_repeat  |
| chr6 | 126300942 | 126301343 | chr6 | 126301036 | 126301275 | L1MA4A           | LINE        | L1             |
| chr6 | 126437251 | 126437652 | .    | .         | .         | .                | .           | .              |
| chr6 | 127821536 | 127821937 | chr6 | 127821910 | 127822067 | MLT1J            | LTR         | MaLR           |
| chr6 | 127869462 | 127869863 | .    | .         | .         | .                | .           | .              |
| chr6 | 127996762 | 127997163 | .    | .         | .         | .                | .           | .              |
| chr6 | 128246465 | 128246866 | .    | .         | .         | .                | .           | .              |
| chr6 | 128792999 | 128793400 | chr6 | 128793304 | 128793398 | 4.5SRNA          | scRNA       | scRNA          |
| chr6 | 129206158 | 129206559 | chr6 | 129206342 | 129206415 | ID4_             | SINE        | ID             |
| chr6 | 131327385 | 131327786 | chr6 | 131327484 | 131327622 | B1F              | SINE        | Alu            |
| chr6 | 132413602 | 132414003 | chr6 | 132413697 | 132413824 | (GAATG)n         | Simple_repe | Simple_repeat  |
| chr6 | 132413602 | 132414003 | chr6 | 132413871 | 132413977 | (GA)n            | Simple_repe | Simple_repeat  |
| chr6 | 132413602 | 132414003 | chr6 | 132413977 | 132414872 | ETnERV2-int      | LTR         | ERVK           |
| chr6 | 134136351 | 134136752 | .    | .         | .         | .                | .           | .              |
| chr6 | 134423260 | 134423661 | chr6 | 134423154 | 134423369 | Tigger7          | DNA         | MER2_type      |
| chr6 | 135102463 | 135102864 | chr6 | 135102502 | 135102550 | (CA)n            | Simple_repe | Simple_repeat  |
| chr6 | 136417058 | 136417459 | .    | .         | .         | .                | .           | .              |
| chr6 | 136914563 | 136914964 | chr6 | 136914683 | 136914906 | MTC              | LTR         | MaLR           |
| chr6 | 136914563 | 136914964 | chr6 | 136914907 | 136915007 | CT-rich          | Low_comple  | Low_complexity |
| chr6 | 136950033 | 136950434 | chr6 | 136950373 | 136950750 | RMER10A          | LTR         | ERVL           |
| chr6 | 137468502 | 137468903 | .    | .         | .         | .                | .           | .              |
| chr6 | 137507391 | 137507792 | chr6 | 137507546 | 137507621 | AmsSINE1         | SINE        | SINE           |
| chr6 | 137514436 | 137514837 | .    | .         | .         | .                | .           | .              |
| chr6 | 137530987 | 137531388 | .    | .         | .         | .                | .           | .              |
| chr6 | 141138282 | 141138683 | .    | .         | .         | .                | .           | .              |
| chr6 | 142316099 | 142316500 | .    | .         | .         | .                | .           | .              |
| chr6 | 142467721 | 142468122 | chr6 | 142467919 | 142467989 | ID4              | SINE        | ID             |
| chr6 | 142467721 | 142468122 | chr6 | 142468056 | 142468101 | (TTA)n           | Simple_repe | Simple_repeat  |
| chr6 | 142467721 | 142468122 | chr6 | 142468104 | 142469147 | Lx2B             | LINE        | L1             |
| chr6 | 142481274 | 142481675 | chr6 | 142481639 | 142481683 | CT-rich          | Low_comple  | Low_complexity |
| chr6 | 143100838 | 143101239 | .    | .         | .         | .                | .           | .              |
| chr6 | 143483518 | 143483919 | chr6 | 143483461 | 143483554 | MIR              | SINE        | MIR            |
| chr6 | 143483518 | 143483919 | chr6 | 143483629 | 143483697 | ID4              | SINE        | ID             |
| chr6 | 143589204 | 143589605 | .    | .         | .         | .                | .           | .              |
| chr6 | 143807109 | 143807510 | chr6 | 143807452 | 143807572 | B3A              | SINE        | B2             |
| chr6 | 146353855 | 146354256 | .    | .         | .         | .                | .           | .              |
| chr6 | 146634131 | 146634532 | chr6 | 146634407 | 146634522 | L2b              | LINE        | L2             |
| chr6 | 147216872 | 147217273 | .    | .         | .         | .                | .           | .              |
| chr6 | 147718538 | 147718939 | chr6 | 147718632 | 147718722 | B2_Mm2           | SINE        | B2             |
| chr6 | 147718538 | 147718939 | chr6 | 147718726 | 147718773 | MLT1J            | LTR         | MaLR           |
| chr6 | 147718538 | 147718939 | chr6 | 147718875 | 147718977 | RLTR42           | LTR         | ERVK           |
| chr6 | 148084504 | 148084905 | chr6 | 148084570 | 148084775 | ERVL-int         | LTR         | ERVL           |
| chr6 | 148689157 | 148689558 | .    | .         | .         | .                | .           | .              |
| chr7 | 3134623   | 3135024   | chr7 | 3134734   | 3134773   | RMER10A          | LTR         | ERVL           |
| chr7 | 3134623   | 3135024   | chr7 | 3134949   | 3135362   | RMER17C          | LTR         | ERVK           |
| chr7 | 3314439   | 3314840   | .    | .         | .         | .                | .           | .              |
| chr7 | 3331763   | 3332164   | .    | .         | .         | .                | .           | .              |
| chr7 | 3452029   | 3452430   | .    | .         | .         | .                | .           | .              |
| chr7 | 4049956   | 4050357   | chr7 | 4049982   | 4050154   | MIR              | SINE        | MIR            |
| chr7 | 4049956   | 4050357   | chr7 | 4050290   | 4050311   | (CACCC)n         | Simple_repe | Simple_repeat  |
| chr7 | 4049956   | 4050357   | chr7 | 4050309   | 4050392   | CT-rich          | Low_comple  | Low_complexity |
| chr7 | 4515846   | 4516247   | chr7 | 4516144   | 4516320   | B3A              | SINE        | B2             |
| chr7 | 6235185   | 6235586   | .    | .         | .         | .                | .           | .              |
| chr7 | 6351174   | 6351575   | .    | .         | .         | .                | .           | .              |
| chr7 | 6362750   | 6363151   | .    | .         | .         | .                | .           | .              |
| chr7 | 7140766   | 7141167   | chr7 | 7141084   | 7141119   | (TTG)n           | Simple_repe | Simple_repeat  |
| chr7 | 7327226   | 7327627   | chr7 | 7327531   | 7327636   | B1F2             | SINE        | Alu            |
| chr7 | 7327226   | 7327627   | chr7 | 7327623   | 7327974   | RMER10A          | LTR         | ERVL           |
| chr7 | 9112095   | 9112496   | chr7 | 9111754   | 9112105   | RMER10A          | LTR         | ERVL           |
| chr7 | 9112095   | 9112496   | chr7 | 9112092   | 9112196   | B1_Mur1          | SINE        | Alu            |
| chr7 | 13534751  | 13535152  | .    | .         | .         | .                | .           | .              |
| chr7 | 13547145  | 13547546  | chr7 | 13547254  | 13547293  | (T)n             | Simple_repe | Simple_repeat  |
| chr7 | 13547145  | 13547546  | chr7 | 13547453  | 13547572  | B1_Mus1          | SINE        | Alu            |
| chr7 | 16614042  | 16614443  | chr7 | 16614374  | 16614831  | 3P3AR            | Satellite   | Satellite      |
| chr7 | 16898387  | 16898788  | chr7 | 16898585  | 16898724  | MIRc             | SINE        | MIR            |
| chr7 | 16991318  | 16991719  | .    | .         | .         | .                | .           | .              |
| chr7 | 19552990  | 19553391  | .    | .         | .         | .                | .           | .              |
| chr7 | 19716567  | 19716968  | .    | .         | .         | .                | .           | .              |
| chr7 | 19881130  | 19881531  | .    | .         | .         | .                | .           | .              |
| chr7 | 19886214  | 19886615  | chr7 | 19886270  | 19886297  | (CAAA)n          | Simple_repe | Simple_repeat  |
| chr7 | 19886214  | 19886615  | chr7 | 19886592  | 19886678  | tRNA-SeC(e)-tRNA | tRNA        | tRNA           |
| chr7 | 19902084  | 19902485  | .    | .         | .         | .                | .           | .              |
| chr7 | 19912600  | 19913001  | chr7 | 19912956  | 19913043  | B1F              | SINE        | Alu            |
| chr7 | 20011678  | 20012079  | chr7 | 20011859  | 20011893  | MLT1K            | LTR         | MaLR           |
| chr7 | 20015037  | 20015438  | .    | .         | .         | .                | .           | .              |
| chr7 | 20461283  | 20461684  | chr7 | 20461426  | 20461509  | MLT1J            | LTR         | MaLR           |
| chr7 | 20461283  | 20461684  | chr7 | 20461532  | 20461885  | MLT1I            | LTR         | MaLR           |
| chr7 | 20496516  | 20496917  | chr7 | 20496403  | 20496630  | L2a              | LINE        | L2             |

|      |           |                |           |                     |             |                |
|------|-----------|----------------|-----------|---------------------|-------------|----------------|
| chr7 | 20518874  | 20519275 chr7  | 20519173  | 20519358 B2_Mm1a    | SINE        | B2             |
| chr7 | 25172295  | 25172696       | .         | .                   | .           | .              |
| chr7 | 25385937  | 25386338       | .         | .                   | .           | .              |
| chr7 | 25393063  | 25393464       | .         | .                   | .           | .              |
| chr7 | 26052748  | 26053149       | .         | .                   | .           | .              |
| chr7 | 26566640  | 26567041       | .         | .                   | .           | .              |
| chr7 | 28589611  | 28590012 chr7  | 28589951  | 28590061 (TG)n      | Simple_repe | Simple_repeat  |
| chr7 | 28799032  | 28799433       | .         | .                   | .           | .              |
| chr7 | 29586506  | 29586907 chr7  | 29586665  | 29586706 (TG)n      | Simple_repe | Simple_repeat  |
| chr7 | 30092733  | 30093134 chr7  | 30092788  | 30092856 (TG)n      | Simple_repe | Simple_repeat  |
| chr7 | 30134877  | 30135278 chr7  | 30134875  | 30135041 L2a        | LINE        | L2             |
| chr7 | 30134877  | 30135278 chr7  | 30135068  | 30135317 MLT1J2     | LTR         | MaLR           |
| chr7 | 30168274  | 30168675       | .         | .                   | .           | .              |
| chr7 | 30242794  | 30243195 chr7  | 30242634  | 30242816 MIRb       | SINE        | MIR            |
| chr7 | 30303482  | 30303883       | .         | .                   | .           | .              |
| chr7 | 30603772  | 30604173       | .         | .                   | .           | .              |
| chr7 | 30738937  | 30739338       | .         | .                   | .           | .              |
| chr7 | 31001722  | 31002123       | .         | .                   | .           | .              |
| chr7 | 31158518  | 31158919       | .         | .                   | .           | .              |
| chr7 | 31787669  | 31788070       | .         | .                   | .           | .              |
| chr7 | 31993090  | 31993491 chr7  | 31992997  | 31993143 B1_Mur4    | SINE        | Alu            |
| chr7 | 31993090  | 31993491 chr7  | 31993165  | 31993219 (CCAA)n    | Simple_repe | Simple_repeat  |
| chr7 | 31993090  | 31993491 chr7  | 31993222  | 31993259 (CCGAA)n   | Simple_repe | Simple_repeat  |
| chr7 | 38961205  | 38961606 chr7  | 38961255  | 38961308 polypurine | Low_comple  | Low_complexity |
| chr7 | 38961205  | 38961606 chr7  | 38961412  | 38962435 RLTR25B    | LTR         | ERVK           |
| chr7 | 38961205  | 38961606 chr7  | 38961128  | 38961255 B1_Mur2    | SINE        | Alu            |
| chr7 | 38985967  | 38986368       | .         | .                   | .           | .              |
| chr7 | 50508840  | 50509241       | .         | .                   | .           | .              |
| chr7 | 50538181  | 50538582 chr7  | 50538158  | 50538233 GA-rich    | Low_comple  | Low_complexity |
| chr7 | 51536360  | 51536761 chr7  | 51536446  | 51536582 MLT1J      | LTR         | MaLR           |
| chr7 | 52701987  | 52702388 chr7  | 52702277  | 52702464 B2_Mm2     | SINE        | B2             |
| chr7 | 52730668  | 52731069       | .         | .                   | .           | .              |
| chr7 | 52736747  | 52737148 chr7  | 52736635  | 52736772 B1_Mus2    | SINE        | Alu            |
| chr7 | 52736747  | 52737148 chr7  | 52736772  | 52736793 (CAAAA)n   | Simple_repe | Simple_repeat  |
| chr7 | 52736747  | 52737148 chr7  | 52737076  | 52737107 (G)n       | Simple_repe | Simple_repeat  |
| chr7 | 52775102  | 52775503       | .         | .                   | .           | .              |
| chr7 | 52793680  | 52794081       | .         | .                   | .           | .              |
| chr7 | 52844406  | 52844807       | .         | .                   | .           | .              |
| chr7 | 52885729  | 52886130       | .         | .                   | .           | .              |
| chr7 | 53118235  | 53118636 chr7  | 53118081  | 53118325 MLT1J1     | LTR         | MaLR           |
| chr7 | 53118235  | 53118636 chr7  | 53118571  | 53118585 MER3       | DNA         | MER1_type      |
| chr7 | 53118235  | 53118636 chr7  | 53118585  | 53118757 MER3       | DNA         | MER1_type      |
| chr7 | 53507180  | 53507581 chr7  | 53507072  | 53507260 URR1B      | DNA         | MER1_type      |
| chr7 | 53645558  | 53645959 chr7  | 53645396  | 53645612 L1MB7      | LINE        | L1             |
| chr7 | 53645558  | 53645959 chr7  | 53645612  | 53645653 (CAAAA)n   | Simple_repe | Simple_repeat  |
| chr7 | 53645558  | 53645959 chr7  | 53645653  | 53645975 L1MB7      | LINE        | L1             |
| chr7 | 53857388  | 53857789       | .         | .                   | .           | .              |
| chr7 | 54218085  | 54218486 chr7  | 54217908  | 54218176 RLTR6-int  | LTR         | ERV1           |
| chr7 | 54218085  | 54218486 chr7  | 54218212  | 54218247 (TC)n      | Simple_repe | Simple_repeat  |
| chr7 | 54218085  | 54218486 chr7  | 54218247  | 54218375 RLTR6-int  | LTR         | ERV1           |
| chr7 | 54286704  | 54287105 chr7  | 54286729  | 54286954 URR1B      | DNA         | MER1_type      |
| chr7 | 56503965  | 56504366       | .         | .                   | .           | .              |
| chr7 | 56533941  | 56534342       | .         | .                   | .           | .              |
| chr7 | 59074061  | 59074462 chr7  | 59073953  | 59074167 L1MC3      | LINE        | L1             |
| chr7 | 59074061  | 59074462 chr7  | 59074461  | 59074596 (TC)n      | Simple_repe | Simple_repeat  |
| chr7 | 59234043  | 59234444 chr7  | 59234201  | 59234267 ID4        | SINE        | ID             |
| chr7 | 71394631  | 71395032       | .         | .                   | .           | .              |
| chr7 | 71471932  | 71472333 chr7  | 71472113  | 71472253 RSINE1     | SINE        | B4             |
| chr7 | 73263136  | 73263537       | .         | .                   | .           | .              |
| chr7 | 73383045  | 73383446 chr7  | 73382926  | 73383070 B1_Mm      | SINE        | Alu            |
| chr7 | 73383045  | 73383446 chr7  | 73383070  | 73384119 Lx5        | LINE        | L1             |
| chr7 | 77004912  | 77005313 chr7  | 77005067  | 77005164 LTR33B     | LTR         | ERV1           |
| chr7 | 77411999  | 77412400       | .         | .                   | .           | .              |
| chr7 | 77778399  | 77778800       | .         | .                   | .           | .              |
| chr7 | 79255628  | 79256029 chr7  | 79256015  | 79256069 (TATG)n    | Simple_repe | Simple_repeat  |
| chr7 | 79835669  | 79836070 chr7  | 79835389  | 79835762 L1M2       | LINE        | L1             |
| chr7 | 80682615  | 80683016       | .         | .                   | .           | .              |
| chr7 | 82262874  | 82263275 chr7  | 82263056  | 82263123 MLT1J      | LTR         | MaLR           |
| chr7 | 86251018  | 86251419       | .         | .                   | .           | .              |
| chr7 | 86481542  | 86481943 chr7  | 86481828  | 86481948 ID_B1      | SINE        | B4             |
| chr7 | 86733191  | 86733592 chr7  | 86733144  | 86733273 RSINE1     | SINE        | B4             |
| chr7 | 86733191  | 86733592 chr7  | 86733315  | 86733483 MLT1J      | LTR         | MaLR           |
| chr7 | 87158745  | 87159146 chr7  | 87159078  | 87159101 (T)n       | Simple_repe | Simple_repeat  |
| chr7 | 88028059  | 88028460 chr7  | 88028452  | 88028521 B3A        | SINE        | B2             |
| chr7 | 88324141  | 88324542 chr7  | 88324034  | 88324238 ID_B1      | SINE        | B4             |
| chr7 | 88324141  | 88324542 chr7  | 88324488  | 88324678 L1MC3      | LINE        | L1             |
| chr7 | 89167318  | 89167719 chr7  | 89167351  | 89167372 AT_rich    | Low_comple  | Low_complexity |
| chr7 | 89167318  | 89167719 chr7  | 89167443  | 89167464 AT_rich    | Low_comple  | Low_complexity |
| chr7 | 89920151  | 89920552       | .         | .                   | .           | .              |
| chr7 | 90886325  | 90886726 chr7  | 90886316  | 90886380 L2b        | LINE        | L2             |
| chr7 | 90886325  | 90886726 chr7  | 90886626  | 90886718 L2b        | LINE        | L2             |
| chr7 | 91087428  | 91087829 chr7  | 91087302  | 91087543 B4A        | SINE        | B4             |
| chr7 | 91614298  | 91614699 chr7  | 91614145  | 91614549 MTEa       | LTR         | MaLR           |
| chr7 | 104594993 | 104595394      | .         | .                   | .           | .              |
| chr7 | 105564002 | 105564403      | .         | .                   | .           | .              |
| chr7 | 106453507 | 106453908      | .         | .                   | .           | .              |
| chr7 | 108458884 | 108459285      | .         | .                   | .           | .              |
| chr7 | 108575341 | 108575742      | .         | .                   | .           | .              |
| chr7 | 109408012 | 109408413 chr7 | 109407982 | 109408097 B1_Mus2   | SINE        | Alu            |
| chr7 | 109408012 | 109408413 chr7 | 109408154 | 109408278 PB1       | SINE        | Alu            |
| chr7 | 109408012 | 109408413 chr7 | 109408279 | 109408351 ID2       | SINE        | ID             |
| chr7 | 109408012 | 109408413 chr7 | 109408351 | 109408659 L1MB2     | LINE        | L1             |
| chr7 | 116690034 | 116690435      | .         | .                   | .           | .              |
| chr7 | 117324123 | 117324524 chr7 | 117324108 | 117324219 (TTTC)n   | Simple_repe | Simple_repeat  |
| chr7 | 117324123 | 117324524 chr7 | 117324219 | 117324401 B3A       | SINE        | B2             |

|      |           |           |      |           |           |         |             |                |
|------|-----------|-----------|------|-----------|-----------|---------|-------------|----------------|
| chr7 | 117324123 | 117324524 | chr7 | 117324420 | 117324600 | B3      | SINE        | B2             |
| chr7 | 118510477 | 118510878 |      |           |           |         |             |                |
| chr7 | 119441665 | 119442066 | chr7 | 119442004 | 119442093 | B4      | SINE        | B4             |
| chr7 | 120292275 | 120292676 | chr7 | 120292578 | 120292631 | CT-rich | Low_comple  | Low_complexity |
| chr7 | 121326906 | 121327307 | chr7 | 121327051 | 121327404 | L2      | LINE        | L2             |
| chr7 | 125735563 | 125735964 |      |           |           |         |             |                |
| chr7 | 126078792 | 126079193 |      |           |           |         |             |                |
| chr7 | 130040635 | 130041036 | chr7 | 130040279 | 130040657 | RMER2   | LTR         | ERV1           |
| chr7 | 130040635 | 130041036 | chr7 | 130040788 | 130040928 | MLT1J1  | LTR         | MaLR           |
| chr7 | 130573833 | 130574234 | chr7 | 130574157 | 130574267 | MLT1D   | LTR         | MaLR           |
| chr7 | 133898335 | 133898736 | chr7 | 133898335 | 133898456 | B1_Mur2 | SINE        | Alu            |
| chr7 | 134623327 | 134623728 |      |           |           |         |             |                |
| chr7 | 135175154 | 135175555 |      |           |           |         |             |                |
| chr7 | 138379597 | 138379998 |      |           |           |         |             |                |
| chr7 | 139921073 | 139921474 |      |           |           |         |             |                |
| chr7 | 142797012 | 142797413 |      |           |           |         |             |                |
| chr7 | 146862334 | 146862735 | chr7 | 146862467 | 146862603 | CT-rich | Low_comple  | Low_complexity |
| chr7 | 146862334 | 146862735 | chr7 | 146862603 | 146862692 | MER20   | DNA         | MER1_type      |
| chr7 | 147248915 | 147249316 | chr7 | 147249288 | 147249362 | (TG)n   | Simple_repe | Simple_repeat  |
| chr7 | 148211357 | 148211758 | chr7 | 148211413 | 148211435 | GC_rich | Low_comple  | Low_complexity |
| chr7 | 148211357 | 148211758 | chr7 | 148211502 | 148211560 | RLTR42  | LTR         | ERVK           |
| chr7 | 148211357 | 148211758 | chr7 | 148211552 | 148211713 | B3      | SINE        | B2             |
| chr7 | 148282427 | 148282828 |      |           |           |         |             |                |
| chr7 | 150554123 | 150554524 | chr7 | 150554112 | 150554796 | L1M4    | LINE        | L1             |
| chr7 | 152094593 | 152094994 | chr7 | 152094544 | 152094650 | ID_B1   | SINE        | B4             |
| chr7 | 152094593 | 152094994 | chr7 | 152094650 | 152094669 | PB1D7   | SINE        | Alu            |
| chr7 | 152094593 | 152094994 | chr7 | 152094754 | 152094828 | MLT1J   | LTR         | MaLR           |
| chr7 | 152094593 | 152094994 | chr7 | 152094986 | 152095062 | ORR1E   | LTR         | MaLR           |
| chr8 | 3593496   | 3593897   | chr8 | 3593830   | 3594334   | RLTR28  | LTR         | ERVL           |
| chr8 | 3672219   | 3672620   |      |           |           |         |             |                |
| chr8 | 4677659   | 4678060   |      |           |           |         |             |                |
| chr8 | 7814323   | 7814724   | chr8 | 7814597   | 7814633   | T-rich  | Low_comple  | Low_complexity |
| chr8 | 7814323   | 7814724   | chr8 | 7814654   | 7814684   | L1_Mur2 | LINE        | L1             |
| chr8 | 7814323   | 7814724   | chr8 | 7814684   | 7815114   | L1_Mus4 | LINE        | L1             |
| chr8 | 8274946   | 8275347   |      |           |           |         |             |                |
| chr8 | 8328359   | 8328760   | chr8 | 8328497   | 8328564   | MIRm    | SINE        | MIR            |
| chr8 | 8605606   | 8606007   |      |           |           |         |             |                |
| chr8 | 10646550  | 10646951  |      |           |           |         |             |                |
| chr8 | 10664789  | 10665190  |      |           |           |         |             |                |
| chr8 | 10977779  | 10978180  |      |           |           |         |             |                |
| chr8 | 11259885  | 11260286  |      |           |           |         |             |                |
| chr8 | 11273492  | 11273893  |      |           |           |         |             |                |
| chr8 | 11323088  | 11323489  |      |           |           |         |             |                |
| chr8 | 11371331  | 11371732  |      |           |           |         |             |                |
| chr8 | 11382427  | 11382828  |      |           |           |         |             |                |
| chr8 | 11486059  | 11486460  | chr8 | 11485939  | 11486103  | L1M4    | LINE        | L1             |
| chr8 | 11959439  | 11959840  | chr8 | 11959605  | 11959664  | RLTR42  | LTR         | ERVK           |
| chr8 | 11959439  | 11959840  | chr8 | 11959663  | 11959857  | RLTR42  | LTR         | ERVK           |
| chr8 | 13548833  | 13549234  |      |           |           |         |             |                |
| chr8 | 13551048  | 13551449  |      |           |           |         |             |                |
| chr8 | 13624744  | 13625145  |      |           |           |         |             |                |
| chr8 | 14306740  | 14307141  |      |           |           |         |             |                |
| chr8 | 14411635  | 14412036  | chr8 | 14410472  | 14411678  | Lx7     | LINE        | L1             |
| chr8 | 14528613  | 14529014  |      |           |           |         |             |                |
| chr8 | 14600551  | 14600952  | chr8 | 14600502  | 14600740  | MTEb    | LTR         | MaLR           |
| chr8 | 14616491  | 14616892  |      |           |           |         |             |                |
| chr8 | 14651358  | 14651759  |      |           |           |         |             |                |
| chr8 | 14705663  | 14706064  | chr8 | 14705950  | 14706325  | ORR1B1  | LTR         | MaLR           |
| chr8 | 15012917  | 15013318  |      |           |           |         |             |                |
| chr8 | 18699089  | 18699490  |      |           |           |         |             |                |
| chr8 | 19707320  | 19707721  | chr8 | 19707699  | 19707836  | MIRc    | SINE        | MIR            |
| chr8 | 19761722  | 19762123  |      |           |           |         |             |                |
| chr8 | 19762693  | 19763094  | chr8 | 19762645  | 19763027  | Lx4A    | LINE        | L1             |
| chr8 | 19762693  | 19763094  | chr8 | 19763030  | 19763532  | RMER13B | LTR         | ERVK           |
| chr8 | 19784449  | 19784850  |      |           |           |         |             |                |
| chr8 | 19927358  | 19927759  |      |           |           |         |             |                |
| chr8 | 19938479  | 19938880  |      |           |           |         |             |                |
| chr8 | 19953288  | 19953689  |      |           |           |         |             |                |
| chr8 | 19962948  | 19963349  | chr8 | 19963303  | 19963370  | Lx      | LINE        | L1             |
| chr8 | 19982744  | 19983145  | chr8 | 19982654  | 19982794  | B1_Mus1 | SINE        | Alu            |
| chr8 | 20017351  | 20017752  | chr8 | 20017473  | 20017599  | MER5B   | DNA         | MER1_type      |
| chr8 | 20032646  | 20033047  | chr8 | 20032567  | 20036607  | L1Md_F  | LINE        | L1             |
| chr8 | 24205909  | 24206310  | chr8 | 24205871  | 24205935  | (TG)n   | Simple_repe | Simple_repeat  |
| chr8 | 24205909  | 24206310  | chr8 | 24205947  | 24206277  | GSAT_MM | Satellite   | Satellite      |
| chr8 | 26384580  | 26384981  | chr8 | 26384486  | 26384626  | B1_Mus1 | SINE        | Alu            |
| chr8 | 26384580  | 26384981  | chr8 | 26384677  | 26384942  | Zaphod  | DNA         | Tip100         |
| chr8 | 32631565  | 32631966  | chr8 | 32631902  | 32631928  | AT_rich | Low_comple  | Low_complexity |
| chr8 | 32830912  | 32831313  |      |           |           |         |             |                |
| chr8 | 32837944  | 32838345  |      |           |           |         |             |                |
| chr8 | 33397051  | 33397452  |      |           |           |         |             |                |
| chr8 | 34545682  | 34546083  |      |           |           |         |             |                |
| chr8 | 35128187  | 35128588  | chr8 | 35128035  | 35128224  | B2_Mm2  | SINE        | B2             |
| chr8 | 35128187  | 35128588  | chr8 | 35128332  | 35128660  | MLT1J   | LTR         | MaLR           |
| chr8 | 35676163  | 35676564  |      |           |           |         |             |                |
| chr8 | 47310812  | 47311213  | chr8 | 47310999  | 47311084  | L1MEc   | LINE        | L1             |
| chr8 | 47310812  | 47311213  | chr8 | 47311166  | 47311226  | RMER5   | LTR         | ERV1           |
| chr8 | 47772149  | 47772550  | chr8 | 47772048  | 47772382  | L1M6    | LINE        | L1             |
| chr8 | 63820825  | 63821226  |      |           |           |         |             |                |
| chr8 | 64070138  | 64070539  |      |           |           |         |             |                |
| chr8 | 72372910  | 72373311  | chr8 | 72373052  | 72373191  | ZP3AR   | Satellite   | Satellite      |
| chr8 | 72372910  | 72373311  | chr8 | 72373230  | 72373305  | ID_B1   | SINE        | B4             |
| chr8 | 72372910  | 72373311  | chr8 | 72373306  | 72373520  | B3      | SINE        | B2             |
| chr8 | 72985625  | 72986026  |      |           |           |         |             |                |
| chr8 | 73028109  | 73028510  |      |           |           |         |             |                |
| chr8 | 74033233  | 74033634  | chr8 | 74033181  | 74033326  | B1_Mus1 | SINE        | Alu            |



|      |           |           |      |           |           |             |             |                |
|------|-----------|-----------|------|-----------|-----------|-------------|-------------|----------------|
| chr8 | 74669372  | 74669773  | chr8 | 74669403  | 74669718  | Lx8         | LINE        | L1             |
| chr8 | 86528538  | 86528939  | .    | .         | .         | .           | .           | .              |
| chr8 | 86661724  | 86662125  | .    | .         | .         | .           | .           | .              |
| chr8 | 87025807  | 87026208  | .    | .         | .         | .           | .           | .              |
| chr8 | 87266016  | 87266417  | .    | .         | .         | .           | .           | .              |
| chr8 | 88126665  | 88127066  | chr8 | 88126711  | 88126816  | RLTR23      | LTR         | ERV1           |
| chr8 | 88126665  | 88127066  | chr8 | 88126839  | 88127069  | RLTR23      | LTR         | ERV1           |
| chr8 | 88130953  | 88131354  | chr8 | 88130768  | 88130979  | RLTR15      | LTR         | ERVK           |
| chr8 | 88130953  | 88131354  | chr8 | 88131035  | 88131236  | RLTR15      | LTR         | ERVK           |
| chr8 | 88130953  | 88131354  | chr8 | 88131313  | 88131352  | (TC)n       | Simple_repe | Simple_repeat  |
| chr8 | 89749590  | 89749991  | chr8 | 89749753  | 89749856  | MLT1J2      | LTR         | MaLR           |
| chr8 | 89749590  | 89749991  | chr8 | 89749919  | 89750032  | MLT1J2      | LTR         | MaLR           |
| chr8 | 94139838  | 94140239  | .    | .         | .         | .           | .           | .              |
| chr8 | 94295312  | 94295713  | chr8 | 94295466  | 94295583  | MLT1J1      | LTR         | MaLR           |
| chr8 | 94911622  | 94912023  | chr8 | 94911759  | 94912105  | LTR33A      | LTR         | ERV1           |
| chr8 | 96375871  | 96376272  | .    | .         | .         | .           | .           | .              |
| chr8 | 96718681  | 96719082  | chr8 | 96718504  | 96718707  | ID_B1       | SINE        | B4             |
| chr8 | 96718681  | 96719082  | chr8 | 96718711  | 96718796  | L1MC3       | LINE        | L1             |
| chr8 | 96718681  | 96719082  | chr8 | 96718865  | 96718990  | L1MC3       | LINE        | L1             |
| chr8 | 107126574 | 107126975 | .    | .         | .         | .           | .           | .              |
| chr8 | 108811316 | 108811717 | .    | .         | .         | .           | .           | .              |
| chr8 | 109053731 | 109054132 | chr8 | 109053804 | 109053892 | BC1_Mm      | scRNA       | scRNA          |
| chr8 | 109053731 | 109054132 | chr8 | 109054079 | 109054210 | MIRb        | SINE        | MIR            |
| chr8 | 109135966 | 109136367 | chr8 | 109135939 | 109136020 | B1_Mus2     | SINE        | Alu            |
| chr8 | 109135966 | 109136367 | chr8 | 109136155 | 109136229 | ID2         | SINE        | ID             |
| chr8 | 109778936 | 109779337 | .    | .         | .         | .           | .           | .              |
| chr8 | 110013669 | 110014070 | .    | .         | .         | .           | .           | .              |
| chr8 | 113313061 | 113313462 | .    | .         | .         | .           | .           | .              |
| chr8 | 114303621 | 114304022 | .    | .         | .         | .           | .           | .              |
| chr8 | 117139997 | 117140398 | chr8 | 117140156 | 117140303 | C-rich      | Low_comple  | Low_complexity |
| chr8 | 117720765 | 117721166 | chr8 | 117720754 | 117720892 | MLT1H       | LTR         | MaLR           |
| chr8 | 117720765 | 117721166 | chr8 | 117720900 | 117721003 | MLT1J1      | LTR         | MaLR           |
| chr8 | 122233085 | 122233486 | chr8 | 122233280 | 122233310 | (CA)n       | Simple_repe | Simple_repeat  |
| chr8 | 122233085 | 122233486 | chr8 | 122233311 | 122233362 | (TC)n       | Simple_repe | Simple_repeat  |
| chr8 | 122740881 | 122741282 | chr8 | 122740898 | 122741010 | L2b         | LINE        | L2             |
| chr8 | 123335853 | 123336254 | chr8 | 123336014 | 123336099 | MLT1J       | LTR         | MaLR           |
| chr8 | 123451976 | 123452377 | .    | .         | .         | .           | .           | .              |
| chr8 | 123657938 | 123658339 | .    | .         | .         | .           | .           | .              |
| chr8 | 123700095 | 123700496 | chr8 | 123700147 | 123700170 | (TTTA)n     | Simple_repe | Simple_repeat  |
| chr8 | 123700095 | 123700496 | chr8 | 123700268 | 123700419 | MLT1J       | LTR         | MaLR           |
| chr8 | 123711626 | 123712027 | .    | .         | .         | .           | .           | .              |
| chr8 | 123738792 | 123739193 | chr8 | 123738969 | 123739150 | B3A         | SINE        | B2             |
| chr8 | 124197812 | 124198213 | chr8 | 124197800 | 124198104 | MLT1J       | LTR         | MaLR           |
| chr8 | 124514780 | 124515181 | .    | .         | .         | .           | .           | .              |
| chr8 | 124668720 | 124669121 | .    | .         | .         | .           | .           | .              |
| chr8 | 124697933 | 124698334 | .    | .         | .         | .           | .           | .              |
| chr8 | 125430680 | 125431081 | chr8 | 125430642 | 125430745 | LTR41B      | LTR         | ERV1           |
| chr8 | 126189949 | 126190350 | .    | .         | .         | .           | .           | .              |
| chr8 | 126216064 | 126216465 | .    | .         | .         | .           | .           | .              |
| chr8 | 126716721 | 126717122 | .    | .         | .         | .           | .           | .              |
| chr8 | 126936507 | 126936908 | .    | .         | .         | .           | .           | .              |
| chr8 | 127350538 | 127350939 | .    | .         | .         | .           | .           | .              |
| chr8 | 127707844 | 127708245 | .    | .         | .         | .           | .           | .              |
| chr8 | 127777573 | 127777974 | chr8 | 127777253 | 127777577 | ORR1A2      | LTR         | MaLR           |
| chr8 | 127777573 | 127777974 | chr8 | 127777577 | 127777716 | ORR1E       | LTR         | MaLR           |
| chr8 | 127810154 | 127810555 | .    | .         | .         | .           | .           | .              |
| chr8 | 128791019 | 128791420 | chr8 | 128790608 | 128791035 | L1MA4       | LINE        | L1             |
| chr8 | 128791019 | 128791420 | chr8 | 128791393 | 128791504 | PB1D10      | SINE        | Alu            |
| chr8 | 129074894 | 129075295 | .    | .         | .         | .           | .           | .              |
| chr8 | 129090621 | 129091022 | .    | .         | .         | .           | .           | .              |
| chr8 | 129127172 | 129127573 | .    | .         | .         | .           | .           | .              |
| chr8 | 129190240 | 129190641 | chr8 | 129190207 | 129190251 | (TG)n       | Simple_repe | Simple_repeat  |
| chr8 | 129190240 | 129190641 | chr8 | 129190258 | 129190291 | (GGGAGA)n   | Simple_repe | Simple_repeat  |
| chr8 | 129209275 | 129209676 | .    | .         | .         | .           | .           | .              |
| chr8 | 129260029 | 129260430 | .    | .         | .         | .           | .           | .              |
| chr8 | 129356478 | 129356879 | .    | .         | .         | .           | .           | .              |
| chr8 | 129362834 | 129363235 | chr8 | 129362965 | 129362992 | (TG)n       | Simple_repe | Simple_repeat  |
| chr8 | 129373690 | 129374091 | .    | .         | .         | .           | .           | .              |
| chr8 | 129376934 | 129377335 | chr8 | 129377260 | 129377290 | (GGGTG)n    | Simple_repe | Simple_repeat  |
| chr8 | 129443109 | 129443510 | .    | .         | .         | .           | .           | .              |
| chr8 | 130762835 | 130763236 | .    | .         | .         | .           | .           | .              |
| chr8 | 130796862 | 130797263 | .    | .         | .         | .           | .           | .              |
| chr9 | 2999914   | 3000315   | chr9 | 3000002   | 3038419   | GSAT_MM     | Satellite   | Satellite      |
| chr9 | 3004618   | 3005019   | chr9 | 3000002   | 3038419   | GSAT_MM     | Satellite   | Satellite      |
| chr9 | 3015106   | 3015507   | chr9 | 3000002   | 3038419   | GSAT_MM     | Satellite   | Satellite      |
| chr9 | 3019153   | 3019554   | chr9 | 3000002   | 3038419   | GSAT_MM     | Satellite   | Satellite      |
| chr9 | 3026462   | 3026863   | chr9 | 3000002   | 3038419   | GSAT_MM     | Satellite   | Satellite      |
| chr9 | 3031831   | 3032232   | chr9 | 3000002   | 3038419   | GSAT_MM     | Satellite   | Satellite      |
| chr9 | 3035711   | 3036112   | chr9 | 3000002   | 3038419   | GSAT_MM     | Satellite   | Satellite      |
| chr9 | 3258655   | 3259056   | chr9 | 3258511   | 3258766   | LSU-rRNA_Hr | rRNA        | rRNA           |
| chr9 | 3258655   | 3259056   | chr9 | 3258789   | 3259525   | LSU-rRNA_Hr | rRNA        | rRNA           |
| chr9 | 4376190   | 4376591   | .    | .         | .         | .           | .           | .              |
| chr9 | 5264083   | 5264484   | .    | .         | .         | .           | .           | .              |
| chr9 | 6434080   | 6434481   | chr9 | 6434107   | 6434466   | MTEb        | LTR         | MaLR           |
| chr9 | 6434080   | 6434481   | chr9 | 6434466   | 6434647   | MTEb-int    | LTR         | MaLR           |
| chr9 | 7594903   | 7595304   | chr9 | 7594844   | 7595230   | MTD         | LTR         | MaLR           |
| chr9 | 11380615  | 11381016  | chr9 | 11380316  | 11380894  | RLTR1       | LTR         | ERV1           |
| chr9 | 13291529  | 13291930  | .    | .         | .         | .           | .           | .              |
| chr9 | 14446262  | 14446663  | chr9 | 14446598  | 14446624  | (TCC)n      | Simple_repe | Simple_repeat  |
| chr9 | 20556030  | 20556431  | chr9 | 20556002  | 20556067  | ORR1E       | LTR         | MaLR           |
| chr9 | 20556030  | 20556431  | chr9 | 20556239  | 20556468  | LTR33A      | LTR         | ERV1           |
| chr9 | 20985701  | 20986102  | chr9 | 20985609  | 20985733  | B1F2        | SINE        | Alu            |
| chr9 | 21519749  | 21520150  | .    | .         | .         | .           | .           | .              |
| chr9 | 21533746  | 21534147  | .    | .         | .         | .           | .           | .              |
| chr9 | 21608693  | 21609094  | chr9 | 21608735  | 21608807  | GA-rich     | Low_comple  | Low_complexity |

|      |          |          |      |          |          |           |             |                |
|------|----------|----------|------|----------|----------|-----------|-------------|----------------|
| chr9 | 21705922 | 21706323 | chr9 | 21706070 | 21706137 | LTR33A    | LTR         | ERVL           |
| chr9 | 21705922 | 21706323 | chr9 | 21706286 | 21706384 | B3        | SINE        | B2             |
| chr9 | 21727742 | 21728143 | chr9 | 21727649 | 21727767 | B1F       | SINE        | Alu            |
| chr9 | 21727742 | 21728143 | chr9 | 21727994 | 21728109 | ID_B1     | SINE        | B4             |
| chr9 | 21727742 | 21728143 | chr9 | 21728113 | 21728177 | T-rich    | Low_comple  | Low_complexity |
| chr9 | 24346342 | 24346743 | chr9 | 24346317 | 24346416 | RMER20B   | LTR         | ERVK           |
| chr9 | 24346342 | 24346743 | chr9 | 24346451 | 24346603 | SYNREP_MM | Satellite   | Satellite      |
| chr9 | 24346342 | 24346743 | chr9 | 24346658 | 24347870 | Lx9       | LINE        | L1             |
| chr9 | 31073641 | 31074042 | chr9 | 31073647 | 31073754 | MMSAT4    | Satellite   | Satellite      |
| chr9 | 32517544 | 32517945 | chr9 | 32517869 | 32517996 | MIRc      | SINE        | MIR            |
| chr9 | 32788424 | 32788825 | chr9 | 32788484 | 32788700 | MIR       | SINE        | MIR            |
| chr9 | 34087416 | 34087817 | .    | .        | .        | .         | .           | .              |
| chr9 | 34346268 | 34346669 | .    | .        | .        | .         | .           | .              |
| chr9 | 34701629 | 34702030 | chr9 | 34701710 | 34701843 | MIRb      | SINE        | MIR            |
| chr9 | 34777509 | 34777910 | chr9 | 34777806 | 34777860 | L3b       | LINE        | CR1            |
| chr9 | 35112789 | 35113190 | chr9 | 35112790 | 35113194 | GSAT_MM   | Satellite   | Satellite      |
| chr9 | 40204715 | 40205116 | chr9 | 40204818 | 40204838 | (CAG)n    | Simple_repe | Simple_repeat  |
| chr9 | 40564372 | 40564773 | chr9 | 40564316 | 40564421 | PB1       | SINE        | Alu            |
| chr9 | 41283414 | 41283815 | chr9 | 41283770 | 41283990 | MIRc      | SINE        | MIR            |
| chr9 | 41403900 | 41404301 | .    | .        | .        | .         | .           | .              |
| chr9 | 42819165 | 42819566 | chr9 | 42819387 | 42819519 | RMER15    | LTR         | ERVL           |
| chr9 | 42823538 | 42823939 | .    | .        | .        | .         | .           | .              |
| chr9 | 43070018 | 43070419 | .    | .        | .        | .         | .           | .              |
| chr9 | 43506394 | 43506795 | chr9 | 43506257 | 43506421 | L2b       | LINE        | L2             |
| chr9 | 43605429 | 43605830 | .    | .        | .        | .         | .           | .              |
| chr9 | 43753404 | 43753805 | chr9 | 43753377 | 43753948 | MLT1N2    | LTR         | MaLR           |
| chr9 | 43866815 | 43867216 | chr9 | 43867064 | 43867275 | MLT1C     | LTR         | MaLR           |
| chr9 | 44291681 | 44292082 | .    | .        | .        | .         | .           | .              |
| chr9 | 44712982 | 44713383 | .    | .        | .        | .         | .           | .              |
| chr9 | 47969852 | 47970253 | chr9 | 47969880 | 47969963 | MIRb      | SINE        | MIR            |
| chr9 | 49300206 | 49300607 | .    | .        | .        | .         | .           | .              |
| chr9 | 50388465 | 50388866 | .    | .        | .        | .         | .           | .              |
| chr9 | 50866970 | 50867371 | .    | .        | .        | .         | .           | .              |
| chr9 | 50913826 | 50914227 | .    | .        | .        | .         | .           | .              |
| chr9 | 54416525 | 54416926 | chr9 | 54416840 | 54416922 | ID4       | SINE        | ID             |
| chr9 | 54635708 | 54636109 | chr9 | 54636083 | 54636213 | ID_B1     | SINE        | B4             |
| chr9 | 54649317 | 54649718 | .    | .        | .        | .         | .           | .              |
| chr9 | 55209854 | 55210255 | chr9 | 55209708 | 55210158 | MTC       | LTR         | MaLR           |
| chr9 | 56113398 | 56113799 | chr9 | 56113352 | 56113488 | Lx7       | LINE        | L1             |
| chr9 | 56113398 | 56113799 | chr9 | 56113485 | 56113572 | Lx7       | LINE        | L1             |
| chr9 | 56311362 | 56311763 | .    | .        | .        | .         | .           | .              |
| chr9 | 56313075 | 56313476 | .    | .        | .        | .         | .           | .              |
| chr9 | 56356852 | 56357253 | chr9 | 56356977 | 56357057 | L2b       | LINE        | L2             |
| chr9 | 56720262 | 56720663 | .    | .        | .        | .         | .           | .              |
| chr9 | 57275721 | 57276122 | chr9 | 57276045 | 57276122 | (CA)n     | Simple_repe | Simple_repeat  |
| chr9 | 57507522 | 57507923 | chr9 | 57507397 | 57507526 | B1F1      | SINE        | Alu            |
| chr9 | 57507522 | 57507923 | chr9 | 57507864 | 57507878 | ID_B1     | SINE        | B4             |
| chr9 | 57507522 | 57507923 | chr9 | 57507878 | 57508003 | B1_Mur1   | SINE        | Alu            |
| chr9 | 57679232 | 57679633 | .    | .        | .        | .         | .           | .              |
| chr9 | 57819911 | 57820312 | chr9 | 57819929 | 57819977 | ID4       | SINE        | ID             |
| chr9 | 58062305 | 58062706 | chr9 | 58062589 | 58062615 | (TG)n     | Simple_repe | Simple_repeat  |
| chr9 | 58123118 | 58123519 | chr9 | 58123320 | 58123424 | L1MD3     | LINE        | L1             |
| chr9 | 58128363 | 58128764 | chr9 | 58128312 | 58128654 | RLTR30    | LTR         | ERV1           |
| chr9 | 58128363 | 58128764 | chr9 | 58128683 | 58128843 | B3        | SINE        | B2             |
| chr9 | 58147183 | 58147584 | .    | .        | .        | .         | .           | .              |
| chr9 | 58294228 | 58294629 | chr9 | 58294342 | 58294504 | MLT1J     | LTR         | MaLR           |
| chr9 | 58294228 | 58294629 | chr9 | 58294175 | 58294342 | B2_Mm2    | SINE        | B2             |
| chr9 | 58392551 | 58392952 | chr9 | 58392707 | 58393067 | MLT1J     | LTR         | MaLR           |
| chr9 | 58928102 | 58928503 | chr9 | 58928066 | 58928137 | MTEa      | LTR         | MaLR           |
| chr9 | 59037256 | 59037657 | chr9 | 59037599 | 59037984 | ORR1B1    | LTR         | MaLR           |
| chr9 | 59432754 | 59433155 | chr9 | 59432886 | 59433041 | L2        | LINE        | L2             |
| chr9 | 60925000 | 60925401 | chr9 | 60924867 | 60925215 | LTR33A    | LTR         | ERVL           |
| chr9 | 62358335 | 62358736 | chr9 | 62358532 | 62358603 | MLT1J     | LTR         | MaLR           |
| chr9 | 62407659 | 62408060 | .    | .        | .        | .         | .           | .              |
| chr9 | 62456218 | 62456619 | chr9 | 62456082 | 62456291 | MLT2B1    | LTR         | ERVL           |
| chr9 | 62456218 | 62456619 | chr9 | 62456386 | 62456480 | (GAATG)n  | Simple_repe | Simple_repeat  |
| chr9 | 62456218 | 62456619 | chr9 | 62456499 | 62456817 | MTC       | LTR         | MaLR           |
| chr9 | 62472493 | 62472894 | .    | .        | .        | .         | .           | .              |
| chr9 | 62474645 | 62475046 | .    | .        | .        | .         | .           | .              |
| chr9 | 62676647 | 62677048 | chr9 | 62677009 | 62677391 | MTA_Mm    | LTR         | MaLR           |
| chr9 | 62957033 | 62957434 | chr9 | 62957304 | 62957411 | MIR       | SINE        | MIR            |
| chr9 | 62980708 | 62981109 | chr9 | 62981089 | 62981196 | U6        | snRNA       | snRNA          |
| chr9 | 63504902 | 63505303 | .    | .        | .        | .         | .           | .              |
| chr9 | 63550208 | 63550609 | .    | .        | .        | .         | .           | .              |
| chr9 | 63566589 | 63566990 | .    | .        | .        | .         | .           | .              |
| chr9 | 63591694 | 63592095 | chr9 | 63591955 | 63592162 | B3        | SINE        | B2             |
| chr9 | 63651353 | 63651754 | chr9 | 63651652 | 63651939 | B4        | SINE        | B4             |
| chr9 | 63657975 | 63658376 | chr9 | 63657906 | 63658027 | ID_B1     | SINE        | B4             |
| chr9 | 63776971 | 63777372 | chr9 | 63777095 | 63777214 | MLT1J     | LTR         | MaLR           |
| chr9 | 63789549 | 63789950 | .    | .        | .        | .         | .           | .              |
| chr9 | 63838987 | 63839388 | chr9 | 63838993 | 63839100 | PB1D7     | SINE        | Alu            |
| chr9 | 63978796 | 63979197 | chr9 | 63978738 | 63978922 | B3        | SINE        | B2             |
| chr9 | 63978796 | 63979197 | chr9 | 63978930 | 63979040 | B1_Mur4   | SINE        | Alu            |
| chr9 | 63978796 | 63979197 | chr9 | 63979064 | 63979264 | B3        | SINE        | B2             |
| chr9 | 65044432 | 65044833 | chr9 | 65044377 | 65044494 | U5        | snRNA       | snRNA          |
| chr9 | 65049592 | 65049993 | chr9 | 65049532 | 65049648 | U5        | snRNA       | snRNA          |
| chr9 | 65398779 | 65399180 | .    | .        | .        | .         | .           | .              |
| chr9 | 66448810 | 66449211 | .    | .        | .        | .         | .           | .              |
| chr9 | 66836829 | 66837230 | .    | .        | .        | .         | .           | .              |
| chr9 | 69144241 | 69144642 | chr9 | 69144316 | 69144360 | (TTTTG)n  | Simple_repe | Simple_repeat  |
| chr9 | 70089164 | 70089565 | .    | .        | .        | .         | .           | .              |
| chr9 | 70096671 | 70097072 | .    | .        | .        | .         | .           | .              |
| chr9 | 70653813 | 70654214 | chr9 | 70653725 | 70653876 | B1_Mur3   | SINE        | Alu            |
| chr9 | 70653813 | 70654214 | chr9 | 70653941 | 70654051 | PB1       | SINE        | Alu            |
| chr9 | 71746740 | 71747141 | .    | .        | .        | .         | .           | .              |



|      |           |           |      |           |           |           |            |                |
|------|-----------|-----------|------|-----------|-----------|-----------|------------|----------------|
| chrX | 139099876 | 139100277 | chrX | 139099975 | 139100334 | ORR1E     | LTR        | MaLR           |
| chrX | 139917400 | 139917801 | chrX | 139917547 | 139917652 | SYNREP_MM | Satellite  | Satellite      |
| chrX | 139917400 | 139917801 | chrX | 139917676 | 139918331 | L1Md_F2   | LINE       | L1             |
| chrX | 139935704 | 139936105 | .    | .         | .         | .         | .          | .              |
| chrX | 140052696 | 140053097 | chrX | 140052478 | 140052703 | MIRb      | SINE       | MIR            |
| chrX | 140052696 | 140053097 | chrX | 140052756 | 140052787 | AT_rich   | Low_comple | Low_complexity |
| chrX | 158072300 | 158072701 | chrX | 158072407 | 158072705 | MLT1J     | LTR        | MaLR           |
| chrX | 163083764 | 163084165 | chrX | 163083906 | 163083985 | MLT1J2    | LTR        | MaLR           |
| chrX | 165561591 | 165561992 | .    | .         | .         | .         | .          | .              |
| chrX | 166424705 | 166425106 | .    | .         | .         | .         | .          | .              |
| chrX | 166438809 | 166439210 | .    | .         | .         | .         | .          | .              |
| chrX | 166444799 | 166445200 | .    | .         | .         | .         | .          | .              |
| chrX | 166446510 | 166446911 | chrX | 166446740 | 166446765 | AT_rich   | Low_comple | Low_complexity |
| chrY | 2688238   | 2688639   | chrY | 2687752   | 2692209   | SYNREP_MM | Satellite  | Satellite      |
| chrY | 2765602   | 2766003   | chrY | 2761830   | 2766398   | SYNREP_MM | Satellite  | Satellite      |
